# Supplementary material for: Profiling presynaptic scaffolds using split-GFP reconstitution reveals cell-type-specific spatial configurations in the fly brain
Source: eLife. 2026 Mar 18;14:RP107663. doi: 10.7554/eLife.107663 (PMC12999173; doi:10.7554/eLife.107663)
Supplement: Source data 1. [file elife-107663-data1.xlsx]

## Sheet: Figure 1
Figure 1F			Figure 1H
DD	LL		DPM	APL
38	31		21163	10627
34	35		19031	11698
40	37		18213	11609
38	43		18361	12387
40	39		19278	12857
43	33
35	32
37	38
43	36
50	36
31	43
38	35
42	42
38	39
38	39
45	38
47	39
48	36
41	37
39	39
41	34
37	38
37	40
41	38
44	37
41	37
40	40
46	36
42	44
43	34

## Sheet: Figure 1 figure supplements
Figure 1-figure supplement 1A			Figure 1-figure supplement 1B			Figure 1-figure supplement 3								Figure 1-figure supplement 4B
Ubiquitin as reference			R57C10>GFP1-10	R57C10>Brp::rGFP		Ctrl	sample 1	sample 2	sample 3	sample 4	sample 5	sample 6		Brp cluster #1 XY							Brp cluster #1 FWHM
UAS-GFP1-10/+	Brp::GFP11, UAS-GFP1-10/+		1375.64	1107.63		γ1	74245.7	66324.7	70175.1	40275.7	80834.9	52761.6		Distance (μm)	Raw	5x	10x	20x	40x		Iteration	FWHM XY	FWHM XZ
1.48208	1.4432		1221.33	832.564		γ2	159109	103320	119491	131978	131995	161325		0	50.25	36.685	20.766	7.117	0.735		0	0.322	0.6935
0.773532	0.662361		1156.52	1140.89		γ3	167708	152672	137255	146044	155194	163294		0.079	83.295	63.738	37.085	13.765	2.054		5	0.272	0.5826
0.872267	0.802914		1023.43	996.1		γ4	174155	139895	140622	143289	152166	164196		0.158	206.727	210.82	163.916	89.877	22.315		10	0.242	0.5063
			1382.46	1158.39		γ5	195207	135318	136476	154310	163598	145519		0.237	621.136	745.08	664.942	453.17	158.875		20	0.208	0.4123
Tubulin as reference			1104.77	986.824		Rab3-RNAi	sample 1	sample 2	sample 3	sample 4	sample 5	sample 6		0.316	1196.57	1808.21	2021.44	2138.14	1741.18		40	0.181	0.3716
UAS-GFP1-10/+	Brp::GFP11, UAS-GFP1-10/+		1859.54	842.435		γ1	80260.8	57220.1	87548.6	74786.7	51936.1	75398.8		0.395	1627.14	2959.33	3898.22	5478.47	7067.65
1.47957	1.10298		1517.6	872.314		γ2	169708	155214	180565	142611	189994	198889		0.474	1699.2	3288.59	4563.4	6932.32	9819.64
0.946497	0.631837		1231.23	777.461		γ3	176430	195258	188004	169965	200784	235769		0.553	1248.25	2228.04	2906.43	4031.75	5156.65
0.714078	0.730421		1354.87	914.033		γ4	194463	195496	199540	172426	220254	234900		0.632	558.75	760.822	770.807	661.276	347.826
			1254.22	796.243		γ5	192850	205913	220848	190778	211232	236400		0.711	190.159	170.736	117.713	47.872	6.26
														0.79	139.75	82.617	39.749	8.212	0.338
														0.869	193.5	99.827	41.016	6.501	0.197
														Brp cluster #2 XY							Brp cluster #2 FWHM
														Distance (μm)	Raw	5x	10x	20x	40x		Iteration	FWHM XY	FWHM XZ
														0	196.426	101.917	40.203	5.357	0.088		0	0.3465	0.6985
														0.079	187.246	110.324	48.802	8.073	0.197		5	0.2631	0.5126
														0.158	334.827	254.367	153.857	50.429	4.675		10	0.2297	0.4487
														0.237	757.459	1008.69	973.315	689.017	263.243		20	0.1958	0.4013
														0.316	1461.8	2890.2	3727.47	4270.73	3859.58		40	0.1628	0.3737
														0.395	1917.78	4741.49	7328.81	11047.1	14561.8
														0.474	1687.91	4586.13	7742.68	13320.7	20714.3
														0.553	1251.53	2889.42	4334.99	6206.96	7269.11
														0.632	650.944	924.003	910.673	684.259	266.968
														0.711	332.509	326.571	233.039	87.525	9.217
														0.79	148.127	98.194	48.874	9.243	0.254
														0.869	67.59	33.23	12.555	1.404	0.014
														Brp cluster #3 XY							Brp cluster #3 FWHM
														Distance (μm)	Raw	5x	10x	20x	40x		Iteration	FWHM XY	FWHM XZ
														0	65.375	38.125	22.379	6.769	0.762		0	0.3465	0.6985
														0.079	90.753	58.702	37.601	13.726	1.968		5	0.2631	0.5126
														0.158	220.594	196.752	144.24	76.402	21.653		10	0.2297	0.4487
														0.237	685.193	887.822	830.698	595.408	278.201		20	0.1958	0.4013
														0.316	1270.62	2280.28	2708.69	2849.46	2459.13		40	0.1628	0.3737
														0.395	1769.7	4092.22	5870.59	8393.16	11410.9
														0.474	1711.72	4253.64	6409.64	9814.93	14335.1
														0.553	1204.55	2638.71	3625.7	4890.06	6198.68
														0.632	679.849	1140.59	1241.26	1096.59	645.049
														0.711	212.548	237.969	186.788	91.39	22.065
														0.79	122.5	103.271	70.348	26.946	4.371
														0.869	0	0	0	0	0

## Sheet: Figure 1H reconstructions
DPM	Note: z values need to be corrected according to the voxel size					APL
Spot	X	Y	Z			Spot	X	Y	Z
0	1859.35	2368.19	74			0	1118.81	2518.18	0.305556
1	1741.25	2846.72	59.3889			1	1103.91	2505.42	0.48913
2	1659.39	2645.24	118.517			2	994.089	2978.78	30.1538
3	1875.16	2201.97	19.525			3	999.186	2973.4	30.8992
4	1943.3	2404.14	12.5443			4	1005.72	2151.42	0
5	1226.21	2556.5	120.486			5	931.723	3165.9	55.4732
6	1968.24	2477.26	98.425			6	1123.44	2528.18	0.0487805
7	271.721	2823.26	72.5882			7	931.57	3176.99	57.1935
8	2262.26	1591.38	118.431			8	1859.78	2628.2	11.8807
9	393.961	2832.47	41.4935			9	846.676	2654.28	6.23529
10	429.971	2620.3	71.4143			10	1332.88	3023.11	21.9167
11	1508.58	2626.33	21.3091			11	786.692	2427.88	0.423077
12	2149.55	1874.89	119.423			12	1099.76	2532.61	0.516129
13	697.494	2932.13	105.506			13	2227.75	2458.6	12.48
14	567.681	2914.76	81.5139			14	2251.37	2280.94	72.1667
15	2108.18	1867.72	98.5			15	793.797	2314.23	17.5946
16	1715.91	3061.52	39.6667			16	2053.71	2270.4	3.48
17	374.121	2377.91	53.2931			17	544.438	2187.12	24.5068
18	527.163	2688.3	125.728			18	660.519	2309.6	34.0962
19	2413.8	669.419	119.568			19	1502.76	2455.25	23.4353
20	1580.62	2716.74	55.4853			20	2669.6	590.435	104.12
21	1507.81	2961.91	67.5			21	2182.75	2521.32	40.5455
22	350.279	2252.29	106.512			22	1192.08	2355.91	113.83
23	942.306	2259.88	64.2041			23	959.779	2376.69	19.5195
24	2660.45	2999.76	144.505			24	2149.77	2391.84	9.54878
25	1321.6	2846.37	11.4478			25	1330.9	2364.06	35.5417
26	1975.06	2331.65	86.5854			26	2268.34	2435.86	12.6949
27	1544.19	3173.71	49.5147			27	2254.67	2799.01	56.4943
28	1376.61	2383	97.6491			28	2169.1	1221.58	80.481
29	1635.18	2749.16	105.567			29	2359.31	2670.39	27.5059
30	2047.39	2376.17	77.5333			30	701.402	3083.21	84.2803
31	1489.91	2361.66	28.6038			31	2087.54	1711.6	82.6471
32	2220.76	493.126	164.456			32	2472.86	2990.56	51.9549
33	2140.77	2851.13	53.7333			33	413.047	2283.36	31.5581
34	1383.83	2912.79	108.507			34	650.903	2226.69	75.7611
35	1921.24	2624.08	41.5395			35	2103.32	1199.69	83.6528
36	352.172	2562.66	62.4062			36	896.139	2137.32	28.4028
37	2236.1	2510.15	98.5211			37	2248.28	1869.45	77.4699
38	2053.99	2733.37	56.52			38	2327.23	2371.5	10.6163
39	688.771	2514.43	93.4479			39	2111.42	2292.58	5.42308
40	2216.15	2378.92	86.4684			40	2410.72	2238.59	12.4773
41	2085.43	265.486	163.611			41	1103	2500.12	94.3483
42	1470.58	2467.39	62			42	2251.36	2219.43	72.4884
43	2107.28	2172.41	140.259			43	2304.05	2273.03	19.629
44	1800.22	2594.68	98.3478			44	2389.11	1828.78	63.2192
45	721.222	2770.61	75.4583			45	2140.95	919.907	108.593
46	1511.33	2818.94	102.594			46	1342.78	3035.71	22.898
47	1140.89	2730.43	67.4			47	2932.36	2734	87.6515
48	1339.35	2668.94	77.4697			48	2199.06	2447.16	10.5325
49	1214.48	2688.39	101.878			49	2236.48	2541.25	34.6056
50	2108.02	2511.32	49.6032			50	2293.26	1168.31	103.515
51	1089.73	2272.27	64.6406			51	2247.16	2346.74	6
52	2160.03	1583.31	165			52	1976.18	2500.98	17
53	2217.74	1972.18	115.527			53	3149.51	2626.84	90.4384
54	1107.45	2848.45	114.515			54	2215.73	2547.76	13.36
55	1410.52	2627.67	77.6			55	2573.24	496.846	93.8846
56	2155.7	2220.5	115.539			56	870.237	2149.03	29.4474
57	1296.87	3022.67	44.3889			57	2518.99	2182.35	27.5775
58	471.581	2964.7	57			58	1871.77	2536.99	86.5443
59	2147.55	2276.76	94.3718			59	2483.72	2460.01	89.8783
60	1731.84	2808.31	54.4426			60	2467.63	2259.43	34.3571
61	1339.94	2671.12	8.37879			61	1017.31	2091.3	62.4938
62	766.924	2603.11	96.4394			62	2243.69	2419.62	11.2364
63	338.901	2513.45	65.493			63	2528.34	2272.05	37
64	1938.52	2574.36	45.6061			64	573.709	2149.06	40.4684
65	1393.38	2907.07	11.4648			65	2366.88	2516.93	25.5116
66	1432.2	2783.46	5			66	2630.1	2552.88	55.5342
67	960.804	2629.68	61.4107			67	1616.49	2186.08	37.5915
68	2320.43	890.386	168.4			68	2432.7	2609.36	88.5581
69	2182.56	2170.73	73.4091			69	1105.9	2328.16	115.193
70	1715.23	3127.9	62.4			70	2415.96	2260.28	51.6792
71	1437.25	3104.62	73.6727			71	1410.34	2224.25	30.6066
72	1994.75	648.247	130.519			72	2228.59	2011.89	77.3939
73	2501.98	630.111	140.651			73	2046.83	2424.43	72.5057
74	852.841	2636.95	65.5714			74	2307.07	2190.45	51.5205
75	1538.21	2831.58	22.4328			75	2616.42	504.358	128.432
76	2050.99	1689.65	124.556			76	1216.39	2853.5	57.5
77	1167.47	2510.74	56.4932			77	2503.42	2698.74	34.5565
78	710	2309.95	108.52			78	2365.64	2286.19	60.5278
79	1352.62	2278.41	59.4754			79	542.596	2503.02	22.5213
80	2101.24	2330.22	47.6667			80	501.67	2302.57	44.7565
81	1524.8	2804.72	81.8243			81	2384.36	2465.9	30.4932
82	1327.37	2405.01	37.56			82	3136.43	2568.27	77.4935
83	479.981	2464.28	105.887			83	616.455	2320.43	21.4286
84	2248.74	533.236	118.539			84	811.573	2278.85	92.5067
85	1540.59	2322.66	52.3182			85	2890.56	2634.29	70.3974
86	1024.9	2586.69	61.5968			86	2153.22	1492.46	65.6269
87	1487.51	2381.79	44.5738			87	653.871	2700.73	51.3143
88	779.175	2241.76	119.571			88	2599.67	440.92	100.54
89	996.04	2173.14	82.26			89	636.58	2775.9	13.4198
90	1441.34	2738.56	51.4706			90	811.828	2312.5	19.6897
91	2307.19	1587.91	155.328			91	2586.09	423.244	99.4744
92	585.444	2756.96	109.5			92	2222.15	2577.55	27.2769
93	1565.35	2610.71	71.5846			93	560.973	2453.15	45.5405
94	1576.85	2960.26	53.4559			94	1000.67	2365.22	104.522
95	1898.56	2415.61	74.3165			95	2492.33	2171.92	57.5342
96	869.726	2147.81	117.355			96	2571.03	413.256	112.462
97	2232.56	2343.62	126.512			97	652.345	2261.55	36.4405
98	1435.79	2801.31	60.1905			98	1856.4	2428.58	13.5059
99	1592.87	2510.87	24			99	2212.53	2555.14	51.4651
100	2301.42	2405.4	88.6604			100	2254.84	1983.91	68.7091
101	1510.5	2951.61	5.54839			101	2323.26	2020.76	45.1304
102	1352.46	3048.34	19.3036			102	1098.18	2072.88	49.3939
103	1280.15	2926.5	75.5152			103	1854.31	2136.77	10.5952
104	896.656	2304.74	70.5082			104	1720.94	2370.23	24.5325
105	326.963	2428.15	46.7593			105	1274.24	2287.61	27.3611
106	1398.35	2791.89	18.6316			106	923.543	2565.33	80.4429
107	1516.05	2756.97	2.48052			107	649.595	2280.08	18.4881
108	733.268	2630.22	57			108	1194.34	2278.27	65.3
109	1222.94	2454.66	93.4627			109	2142.56	2102.62	40.5417
110	2097.77	1995.72	88.3692			110	2128.05	1334.28	87.5658
111	2221.21	2592.88	54			111	2321.06	2041.19	47.5301
112	2191.56	2708.54	167.506			112	2216.58	2101.14	51.5238
113	796.419	2454.31	59.5323			113	2397.92	2169.77	63.4933
114	1370.01	2532.91	44.4853			114	484.807	2445.89	16.5568
115	932.072	2240.83	73.5362			115	995.764	2706.28	77.9861
116	1480.9	2885.36	99.4478			116	2279.92	2415.03	88.4557
117	1607.35	2330.44	58.5909			117	2222.14	1719.08	74.2113
118	1221.76	2353.45	67			118	2223.29	2409.64	9.46053
119	1457.81	3009.86	128.58			119	958.394	2853.37	62.5634
120	1340.74	2885.1	103.522			120	2312.15	2893.49	40.6269
121	1452.98	3094.25	34.4762			121	2172.32	1221.47	109.514
122	203.192	2795.06	55.2115			122	2265.18	2197.39	27.5222
123	1434.64	2420.56	59.3818			123	2184.85	1731.32	62.7447
124	2067.65	1091.38	139.506			124	2121.82	552.483	118.506
125	2454.68	1010.57	128.493			125	2322.11	1358.4	83.525
126	1420.83	2937.95	83.6			126	2396.32	2295.93	27.5135
127	633.689	2720.35	156.459			127	674.469	2315.52	14.5062
128	504.378	2167.97	163.712			128	2163.75	1294.97	84.4531
129	1464.62	2310.67	58.4921			129	3138.99	2908.87	108.46
130	1317.37	2920.93	48.4478			130	1895.87	2737.65	46.6044
131	1391.91	3056	22.4483			131	1222.36	2411.35	103.579
132	731.085	2681.65	74.3902			132	984.957	2632.25	77.6377
133	2415.7	782.149	132.552			133	1686.44	2213.95	19
134	1722.22	2650.86	102.431			134	1204.05	2322.69	88.9615
135	1922.23	2564.58	76.25			135	2568.55	2955.88	60.5481
136	1898.51	2487.44	51.4118			136	2412.96	2368.27	55.5063
137	1566.71	2564.14	90.3571			137	1527.2	2283.81	43.4933
138	963.773	2381.47	97.4697			138	2259.35	2157.14	34.4394
139	1402.98	2543.06	11.6562			139	1470.25	2183.84	36.6173
140	236.986	2546.01	43.4459			140	2130.52	2255.94	41.3594
141	1531.73	2577.73	44.5			141	2044.04	1626.41	83.4533
142	1448.61	2800.47	104.386			142	2375.08	1773.78	71.5
143	2419.48	1106.34	128.478			143	2408.81	2130.41	75.2069
144	1123.13	2249.13	79			144	1033.24	2355.31	33.5172
145	1604.36	2947.74	84.3448			145	2401.71	2069.32	62.5692
146	1980.42	1462.79	141.634			146	736.28	2778.02	11.5244
147	1389.32	2970.25	126.479			147	2446.04	2857.07	42.5
148	989.395	2523.9	127.556			148	3125.44	2918.74	98.3143
149	519.962	3257.1	124.5			149	2208.84	2200.28	35.8947
150	527.74	2897.89	108.507			150	2215.49	2421.02	90.5227
151	1322.12	2793.88	90			151	2293.13	205.511	135.037
152	2160.03	2851.2	62.6333			152	2352.36	2131.97	73.5325
153	1485.54	2953.79	32.4627			153	2372.86	2293.54	47.76
154	1974.56	1098.52	146.885			154	3063.17	2777.58	107.667
155	2231.33	2747.59	50.5116			155	559.928	2500.31	55.7732
156	764.3	2911.04	148.562			156	2369	2285.74	55.4872
157	2200	2344.36	91.3208			157	1385.24	2173.1	47.102
158	495.123	2555.26	119.507			158	2215.96	1666.37	85.4789
159	1516.03	2585.61	14			159	2176.75	1396.01	73.5694
160	1617.45	2814.92	49.2449			160	2279.78	2389.73	41.6102
161	1115.18	2728.68	90.5616			161	1170.68	2429.42	60.5278
162	2321.04	1076.87	160.506			162	2426.94	1985.02	67.2778
163	2133.79	2352.72	79.4366			163	1603	2207.25	22.375
164	1634.38	2619.96	11.4107			164	1125.3	2064.81	48.4286
165	1607.54	2807.54	15.386			165	3096.84	2653.01	112.414
166	1311.98	2939.2	88.5932			166	1610.36	2366.71	25.5325
167	2694.59	2638.8	115.444			167	932.957	2038.81	62.4143
168	1484.14	2574.14	24.5909			168	1903.4	2625.55	28.5
169	1918.76	2736.96	118.415			169	2358.4	2295.25	65.5422
170	2149.92	2884.17	99.3538			170	444.833	2144.5	28.7
171	1392.9	3141.5	55.3269			171	1213.75	2283.22	36.6522
172	2103.42	2961.95	64.4247			172	1326.77	2249.65	52.6667
173	1034.82	2245.65	76.6			173	2370.08	2301.15	58.5
174	1962.49	2352.68	16.5424			174	2271.12	1593.41	61.3939
175	1687.31	2483.95	36.48			175	2088.51	2848.22	56.6825
176	1334.58	3027.78	72.4667			176	1601.85	2451.8	54.5875
177	2265.88	2210.93	74			177	869.857	2517.62	17.5714
178	609.137	3080.96	109.804			178	2246.1	367.368	111.54
179	1431.12	2878.69	76.7708			179	746.821	3234.94	87.5128
180	1095.09	2656.55	112.515			180	2352.99	2231.67	10.5942
181	1682.18	2952.62	69.0769			181	558.407	2371.12	10.6271
182	2113.8	202.427	162.427			182	2384.06	2227.21	44.5606
183	1133.08	2320.54	56			183	1322.03	2239.4	24.2581
184	948.765	2639.26	58.4559			184	2569.51	2725.85	50.6721
185	1288.14	2491.82	132.506			185	2110.87	719.544	124.467
186	321.329	2921.44	46.4286			186	2309.37	1034.92	127.474
187	1193.66	2673.72	113.393			187	2006.78	2576.12	90.3913
188	794.689	2359.11	120.595			188	528.848	2797.7	20.557
189	1401.36	2997.44	26.6			189	2049.13	2405.78	34.3
190	925.787	2267.39	77.4918			190	1813.54	2604.14	12.4487
191	1286.02	2672.1	97.4032			191	1724.35	2519.71	50.5301
192	2241.55	2251.31	96.5455			192	2322.92	2262.38	8.76
193	1640.17	2737.73	80.4714			193	871.254	2574.48	31.6716
194	2397.62	2979.73	158.644			194	789.455	2541.99	11.5341
195	968.257	2456.17	63			195	2429.64	2214.59	55.4098
196	1081.05	2656.21	121			196	2723.37	2586.23	111.562
197	2097.7	2293.66	62.459			197	2469.54	2356.82	23.4306
198	972.096	2916	163.438			198	2087.13	208.023	138.038
199	2569.31	664.87	158.416			199	2450.98	2250.12	27.7018
200	1322.88	2390.37	72.4868			200	998.257	2549.58	34.6351
201	1580.21	2692.21	69.5634			201	978.909	2283.2	46.303
202	997.4	2228.25	107.538			202	1661.62	2521.49	82.4074
203	2474.58	765.671	139.532			203	2323	2034.26	72.3636
204	427.839	2463.4	43.3548			204	525.818	2093.64	41.2
205	1633.29	2807.28	100.487			205	1978.25	2766	21.1887
206	1885.63	2883.61	59.493			206	1612.1	2304.31	61.1154
207	673.753	2979.99	162.34			207	733.45	2240.85	20.3333
208	1719.89	2686.11	59.5873			208	2109.35	1442.3	77.3542
209	2612.86	780.154	126.569			209	3125.99	2730.32	84.4722
210	1486.38	2784.62	65.6346			210	2267.2	2209.91	82.4324
211	2046.31	1411.75	151.642			211	2048.73	2430.98	8.30303
212	2001.32	1209.13	137.426			212	1567.2	2319.93	19.6622
213	1630.55	2956.08	118.204			213	3227.84	2716.32	108.8
214	420.206	3141.43	127.632			214	1002.49	2782.92	38.8878
215	1596.12	3120.09	59.4923			215	876.589	2797.33	74.5263
216	1470.94	2564.88	80.4627			216	1105.75	2226.09	96.0682
217	1483.85	2474.04	64.766			217	2325.7	2613.88	55.4651
218	2196.46	1623.46	106.723			218	2044.07	2286.1	3.59322
219	1451.32	3154.64	100.5			219	2263.91	250.992	134.317
220	2353.51	786.46	151.413			220	2425.67	2331.09	85.5
221	1873.3	2608.09	68.6818			221	3025.14	2647.44	109.371
222	1977.29	2368.9	76.7959			222	2553.44	2784.24	56.5238
223	1105.54	2826.14	74.5139			223	652.214	2457.93	22.2321
224	294.609	2616.7	46.5625			224	1263.22	2470.8	28.6406
225	1295.45	2614.12	88.4462			225	973.889	2181.26	53.3148
226	1721.4	3013.03	39.5441			226	2236.58	2113	53.3051
227	845.123	2301.46	99.4035			227	1612.97	2579.59	58.7812
228	943.492	2458.63	93.5538			228	2387.86	445.274	94.411
229	1567.9	2772.71	100.655			229	3145.89	2637.87	94.4605
230	1330.02	2881.23	31.283			230	1802.01	2815.7	42.0171
231	367.836	2708.96	93.5205			231	1724.2	2277.34	35.4588
232	2308.07	2186.23	88.4754			232	1204.47	2524.41	35.5185
233	1762.65	2668.95	97.5			233	2269.48	2260.13	9
234	1977.4	2361.38	66.4231			234	2385.1	2237.71	13.411
235	1867.57	3101.82	83.4713			235	750.259	2565.88	30.3103
236	902.448	2407.6	136.345			236	1532.29	2256.66	50.2857
237	2114.97	2234.96	118.543			237	2257.53	2589.22	27.2727
238	2447.81	724.027	164.216			238	2795.82	2645.84	88.4588
239	1662.83	2545.05	62			239	1519.76	2232.96	49.4625
240	1820.09	2231.54	21.5			240	1005.04	2232.64	40.3036
241	329.026	2248.66	83			241	2325.67	2062.11	59.8913
242	684.905	2518.12	48.0952			242	2314.04	2568.83	109.29
243	937.957	2413.34	139.557			243	862.511	2471.33	65.4886
244	1409.51	2593.15	71.4746			244	1818.62	2613.84	11.35
245	2573.04	2928.17	125.396			245	1213.49	2556.97	84.5
246	435.02	2804.94	60.1837			246	478.458	2080.22	30.6271
247	2212.42	2893.61	102.448			247	491.343	2199.51	27.3714
248	1447.64	2869.5	5.71429			248	2203.88	288.813	114.992
249	944.629	2404.37	115.5			249	2174.89	1317.9	82.5417
250	713.444	2845	89.4938			250	573.588	2213.94	24.7451
251	994.15	2774.12	119			251	2217.26	2339.92	12.4167
252	1513.92	3011.04	62.2708			252	2502.7	2040.95	60.6667
253	1679.63	2583.9	108.327			253	2288.17	2300.82	41.5
254	1643.8	2508.25	108.4			254	1994.31	2691.99	28.5059
255	972	2689.59	127.471			255	773.932	2355.18	28
256	618.072	2490.29	100.478			256	1301.72	2825.34	60.3924
257	974.593	2714.1	131.547			257	2163.42	1139.43	120.592
258	2073.06	1850.13	102.586			258	1242.26	2657.89	77.7808
259	2064.73	2678.39	43.5821			259	2853.19	2740.28	93.3103
260	183.067	2712.47	58.3667			260	1200.98	2376.33	21.6984
261	2023.15	2255.58	50.5909			261	2185.99	1235.65	109.559
262	2248.5	2498.27	116.443			262	1075.33	2325.61	49.1667
263	1940.83	2643.72	77.5156			263	529.066	2361.11	37.3553
264	2065.05	2307.18	43			264	2131.33	2365.21	67.3182
265	1267.66	2619.89	122.548			265	2504.29	2200.95	67.7119
266	1344.31	3033.1	42.1905			266	1944.27	2754.03	38.5733
267	2500.62	497.079	134.397			267	1041.12	2194.56	34.5256
268	2436.55	803.852	178.67			268	1162.45	2214.86	42.4805
269	1050.95	2275.59	71.1026			269	2401.27	2134.08	66.5909
270	440.116	2901.72	53.1628			270	2517.18	458.045	98.5227
271	1363.8	2860.34	112.526			271	635.908	2718.61	9.55263
272	734.632	2939.16	104.426			272	883.246	2718.75	72.6462
273	1284.97	2907.28	19.4706			273	1267.78	2597.24	29.2985
274	738	2550.76	53			274	2356.74	1993.33	56.5571
275	2202.63	2591	118.523			275	1514.23	2121.25	30.8462
276	2187.44	1749.93	97.5882			276	2777.06	2998.09	116.4
277	672.1	2701.41	169.488			277	2503.88	2119.81	50.4118
278	1379.06	2569.59	60.5397			278	2645.87	2675.46	110.605
279	1386.68	2324.18	88			279	937.917	2551	41.6528
280	1639.84	2361.96	20.5735			280	2546.45	2492.37	79.4878
281	806.486	2540.14	57.4722			281	2502.3	2990.1	54.1421
282	2347.03	582.948	129.506			282	1570.13	2515.11	70.5301
283	2056.62	1143.94	160.635			283	2185.2	1898.55	72.5846
284	1523.32	2628.29	99.5846			284	564.5	2144.44	22.7917
285	563.838	2417.07	67.4559			285	3048.93	2830.49	115.389
286	2264.32	2307.1	108.587			286	3073.51	2822.3	83.4681
287	1270.22	2401.72	62.6094			287	3084.3	2767.17	93.4219
288	1415.35	2554.1	76.75			288	2626.49	2739.14	46.6522
289	2025.78	2438.64	156.513			289	2261.47	1273.5	90.6897
290	1466.49	2617.96	0.584906			290	2277.58	2064.06	44.5556
291	2140.85	2361.9	104.698			291	2680.23	444.453	100.853
292	1637	2700.61	32			292	2299.27	2311.51	12.4324
293	774.09	2138.14	95.5			293	2433.12	1987.75	65.3684
294	2133.6	2299.96	80.5663			294	1063.54	2280.96	34.5062
295	1424.1	2618.56	29.9756			295	1670.81	2238.04	30.6164
296	1095.02	2644.52	98.4262			296	917.823	2493.56	95.5696
297	1989.31	2441.94	54.6731			297	606.104	2698.06	14.5584
298	2166.91	1810.49	111.519			298	2260.08	2170.46	79.4943
299	1778.02	2738.2	124.424			299	1051.14	2645.69	54.5349
300	947.588	2234.68	152.441			300	1682.35	2584.32	50.5795
301	1998.1	1572.71	137			301	2484.82	2287.87	27.2623
302	1858.58	2464.75	41			302	1028.57	2092.17	43
303	1200.84	2241.13	68.4182			303	2453.65	2617.28	88.48
304	1445	2702.58	57.8302			304	1315.07	2492.88	80.5289
305	1573.1	2450.97	52.1			305	1763.5	2295	33
306	1543.61	2824.12	109.357			306	3122.39	2659.5	93.3214
307	1680.54	2653.95	83.4615			307	2186.26	339.19	115.55
308	2316.79	525.253	157.52			308	2580.87	2509.44	52.4286
309	2017.73	2345.63	162.506			309	2158.37	2245.27	55.3651
310	746.617	2584.45	51.5667			310	1500.88	2203.57	44.5233
311	1258.56	2413.08	34.6094			311	1099.77	2261.44	97.5493
312	2308.73	1386.79	160.457			312	2667.78	2417.28	43.6269
313	1539.47	2904.24	67			313	2251.85	1616.63	73.3387
314	486.292	2101.96	110.5			314	2337.53	1706.31	71.5294
315	1275.65	2430.93	56.5139			315	2054.39	1463.16	72.4342
316	587.922	2245.22	120.625			316	2493.5	2387.36	26.25
317	1628.17	2265.39	24.2609			317	2188.99	2489	11.5844
318	2581.85	785.273	125.636			318	2308.95	226.609	133.322
319	797.05	2203.28	88			319	1882.1	2104.79	15.5065
320	1444.49	2436.85	74.4918			320	2480.03	2451.18	21.3936
321	1271.01	2359.51	77.5385			321	2185.63	1448.05	104.56
322	534.915	2299	59.4237			322	1151.72	2492.8	86.87
323	2051.3	2628.58	88.5432			323	842.701	2297.63	100.621
324	434.054	2921.57	42			324	2417.91	2559.84	39.4416
325	1363.05	2601.57	74			325	1278.48	2437.95	84.3607
326	890.13	2669	75.5362			326	2312.99	2498.53	21.5325
327	1942.9	2267.81	50.5397			327	924.181	2178.32	115.514
328	1403.03	2698.39	117.422			328	1534.25	2137.23	35.6462
329	1789.58	2300.78	15			329	968.673	2221.8	115.382
330	1970.03	824.011	139.477			330	2182.42	1152.88	108.1
331	1461.21	2872.03	51.5821			331	2245.05	1251.13	90.5195
332	2103.13	2504.13	29			332	2714.27	462.726	108.655
333	443.958	2594.67	118			333	1261.29	2161.99	39.3867
334	2232.01	2218.87	134.494			334	2235.49	2321.07	55.6197
335	1514.48	2567.77	71.4667			335	2403.34	2556.1	42.3433
336	1974	2844.17	48.4648			336	2192.8	2274.95	98.2321
337	1515.89	2974.89	15.2778			337	762.671	2678.78	73.5823
338	2706.14	2771.79	156.356			338	2178.72	2191.91	27.3433
339	1181.72	2400	66.3966			339	1236.11	2389.03	65.48
340	2024.23	2899.3	45.5775			340	863.662	2287.04	49.4865
341	376.208	2625.5	38.5139			341	2705.2	530.253	104.867
342	2199.56	2504.38	109.507			342	2189.78	2263.04	82.8
343	1632.74	2395.23	85.5556			343	2347.22	2222.28	21.3148
344	2139.09	2048.81	93.6379			344	2299.77	1481.99	94.8108
345	1950.77	2934.36	60.64			345	2611	2691.53	60.5128
346	1585.48	2618.19	27.463			346	2162.22	986.814	106.661
347	1580.53	2898.41	50.2745			347	2369.94	351.141	97.4588
348	551.868	2686.49	128.5			348	1931.3	2495.47	47.4062
349	470.756	2961.65	129.537			349	775.77	2601.56	81.2989
350	2266.68	2231.88	81.5			350	1836.41	2153.56	9.58571
351	2295.66	2202.64	87.5517			351	1731.45	2383.95	38.6333
352	2105.55	2106.45	75.2941			352	2920.96	2951.62	109.421
353	2505.04	851.913	153.594			353	2476.28	2105.32	63.4638
354	1700.58	3131.21	71.2708			354	2577.03	643.092	138.5
355	1873.35	2159.97	27			355	2172.66	1579.08	73.4932
356	1477.48	2770.2	89.6			356	636.101	2675.09	61.557
357	2011.92	2480	34.075			357	588.145	2213.89	16.2742
358	938.1	2376.22	63.3			358	2078.23	1310.14	93.5233
359	2094.9	1201.61	134.323			359	1200.86	2315.02	89.7778
360	1738.44	2705.51	105.507			360	785.304	2423.19	39.3768
361	1903.95	460.564	140.462			361	2934.41	2617.69	110.72
362	2088.78	918.2	133.588			362	2931.36	2994.84	105.744
363	1328.14	3022.78	107.42			363	2318.77	2874.43	34.6981
364	2015.04	2350.38	20.5479			364	2562.82	2786.06	55.5158
365	1045.51	2833.9	63.4493			365	2142.95	1590.93	73
366	2190.05	386.175	151.537			366	1322.4	2341.49	30.4521
367	1325.85	2324.8	60.5574			367	1294.66	2178.95	56.5122
368	746.8	2891.79	102.586			368	655.737	2329.05	36.55
369	1841.88	2519.22	97.5224			369	2269.06	2516.32	68.5294
370	1182.46	2497.22	79			370	1969.22	2351.65	1.32374
371	1973.05	582.228	132.481			371	2131.88	636.31	108.276
372	2041.19	1567	114.433			372	2745	419.453	111.965
373	1655.2	2707.46	11			373	1087.28	2447.46	51.4444
374	1136.33	2917.33	119.587			374	883.393	2201.36	46.7143
375	2305.12	2397.5	110.514			375	2378.8	1939.63	63.2683
376	2133.32	2756.36	72.3051			376	2321.14	1449.03	85.4722
377	522.833	2259.2	100.417			377	2602.65	2237.81	22.4865
378	839.776	2283.98	75.431			378	629.875	2575.5	33.5694
379	2390.96	1099.01	123.458			379	2421.21	2501.65	29.1923
380	1670.47	2513.15	55.4412			380	2296.83	2930.43	50.6462
381	1316.12	2334.28	90.4386			381	717.482	3108.86	83.8072
382	1633.79	3020.76	34.431			382	2300.58	1193.73	90.3167
383	1269.48	2323.06	65.6825			383	2419.95	2164.23	24.4744
384	2150.28	2337.52	107.562			384	1093.19	2408.97	45.55
385	1399	2795.41	5.46552			385	630.835	2326.43	21.5443
386	1626.86	2450.61	42			386	1879.54	2444.44	81.4304
387	972.987	2360.01	104.56			387	2307.36	511.144	107.533
388	293.967	2432.58	59.4333			388	2289.41	1655.25	77.44
389	1427.46	2921.94	26.5278			389	2287.19	2901.98	45.3594
390	1382.54	2298.82	59.72			390	2126.58	1449.28	65.5116
391	1709.37	2867.04	66.7018			391	2601.13	696.43	132.456
392	731.941	2495.39	62.7059			392	1047.15	2112.5	50.3824
393	1764.67	2872.93	120.448			393	1324.08	2405.84	88.6406
394	2029.78	620.184	157.513			394	1692.68	2426.94	24.0426
395	993.754	2543.04	58.3158			395	1923.1	2157.06	42.5
396	1533.68	2611	113.429			396	2552.37	2552.78	34.3051
397	1564.53	3170.72	56.386			397	2090.2	2321	70.339
398	807.727	2433.35	78.5455			398	2342.08	2463.45	23.4595
399	2263.21	2177.88	77.3966			399	3013.29	2941.71	138.536
400	2105.55	1612.42	116.493			400	2237.01	1647.27	86.5227
401	2123.83	1333.45	134.507			401	2374.98	2433.56	74.6667
402	1000.26	2472.78	161.431			402	2253.96	2048.07	74.5915
403	2067.49	2057.84	140.474			403	2750.09	2922.82	127.5
404	1497.21	2404.46	61.4561			404	2458.61	2603.71	29.25
405	1267.62	2979.5	19.5893			405	2174.7	957.827	100.481
406	1454.9	3093.41	50.4262			406	1477.52	2699.48	46.6393
407	1582.47	2871.96	90.1429			407	470.437	2240.31	23.4085
408	2344.28	847.097	121.556			408	1772.43	2364.84	90.5349
409	266.136	2690.08	72.6102			409	768.894	2874.36	57.4353
410	2111.61	224.243	134.405			410	2117.41	1505.36	64.339
411	1334.03	2608.79	35			411	1018.91	2416.91	53.4198
412	2154.72	1941.16	135.519			412	1129.15	2263.85	20.6164
413	960.5	2510.09	74.5938			413	786.175	2201	107.746
414	1500.51	2464.44	110.655			414	3189.06	2766.58	79.1818
415	763.264	2345.74	73.4528			415	1131.06	2449.77	40.6774
416	731.733	2571.42	89.5833			416	1460.68	2375.04	34.5679
417	2598.75	665.475	109.407			417	2031.07	2162.2	26.4667
418	2101.17	1127.81	127.594			418	2280.46	1969.48	40.7593
419	2050.64	458.519	167.988			419	2861.66	2983.21	124.511
420	754.703	2697.49	67			420	727.541	2309.32	35.5676
421	1903.91	2426.25	88.6094			421	402.846	2786.05	34.4945
422	581.143	2229.79	168.532			422	674	2315.33	62.5422
423	2128.33	635.618	149.273			423	632.431	2163	20.1569
424	2144.38	2555.66	96.5915			424	2253.3	2238.85	24.4881
425	2268.61	2569.89	143.514			425	1365.54	2244.95	55.2105
426	1378.3	2472.59	100.393			426	2327.03	2138.51	77.3973
427	1760.91	2976.24	121.462			427	724.013	3021.01	85.1711
428	838.87	2490.09	96.1739			428	1112.2	2357.28	111.354
429	2160.6	1667.19	124.522			429	1202	2655.76	131.18
430	1424.15	2505.53	92.6604			430	2132.24	302.138	112.184
431	1622.22	2776.05	101.4			431	1060.32	2239.09	116.556
432	2086.27	507.5	159.568			432	2348.89	2171.82	87.5488
433	1424.08	2911.32	90.3774			433	2593.59	2545.03	67.4394
434	1480.14	2468.61	20			434	1943.57	2460.67	90.4667
435	567.357	2299.76	55.1667			435	2011.89	2295.35	67.4684
436	775.5	2424.35	67			436	924.329	2936.58	57.5205
437	1300.52	3018.42	57.4516			437	2490.25	2208.47	29.5417
438	239.882	2655.6	53.5588			438	2622.89	632.88	103.53
439	403.353	2385.9	63.4853			439	2456.51	2271.4	20.5
440	1130.46	2356.39	86.4737			440	2503.98	2579.18	86.75
441	765.973	2628.24	73			441	1283.83	2658.79	71.5
442	250.561	2743.46	45.1463			442	834.456	2673.88	40.6471
443	1507.47	3213.38	67.4521			443	2243.51	2059.36	78.5143
444	2078.3	1131.2	165.493			444	1805.47	2438.71	48.5325
445	1342.64	2986.26	99.4242			445	2559	2268.94	68.14
446	2140.19	472.315	169.493			446	1175.12	2260.41	111.518
447	1612.23	2768.15	10.1795			447	2285.88	1761.92	71.5606
448	2132.6	854.041	157.466			448	679.931	2575.78	9.75862
449	1516.8	2397.37	97.5333			449	2204.26	2610.51	88.4444
450	1582.96	2598.1	104.385			450	2399.68	2096.25	46.5556
451	2449.24	1131	132.707			451	1871.22	2651.76	12.2545
452	2009.1	522.171	173.427			452	3204.35	2877.52	108.366
453	1022.3	2455.91	141.434			453	1269.97	2268.63	65.8615
454	2044.24	1395.09	124.478			454	1924.25	2331.95	20
455	2214.65	2636.87	172.518			455	2230.22	2397.4	51.4127
456	1249.38	2917.88	83.5455			456	2417.32	2626.96	34.4615
457	2228.05	1457.71	120.548			457	1173.79	2667.26	63.5647
458	1556.14	2410.42	46.4648			458	2587.08	744.361	131.528
459	263.817	3054.49	136.512			459	560.762	2559.87	29.5476
460	1169.65	2957.97	109.538			460	1485.46	2558.03	48.6522
461	1539.32	2711.98	20.4151			461	2389.98	3062.13	66.4862
462	776.833	2817.32	70.4167			462	2130.8	2559.52	37.5
463	821.045	2105.58	98.5522			463	2245.53	212.468	143.039
464	1331.62	2584.56	114.471			464	2161.42	2685.89	56.9837
465	464.227	2425.74	50.5758			465	2106.74	362.885	92.8205
466	1215.13	2299.13	69			466	2199.44	2182.8	55.5556
467	1393.57	2794.05	66			467	1855.82	2438.92	12.3919
468	2151.93	2035.04	147.597			468	2135.24	1790.96	73.7593
469	569.609	2791.98	63.9655			469	1545.99	2581.24	49.557
470	2143.31	2492.63	136.465			470	1935.28	2103.78	26.5672
471	1036.02	2501.06	55.72			471	2988.11	2656.78	67.8125
472	1469.5	2711.58	38.0526			472	994.247	2233.37	63.6849
473	1797.44	2885.05	30			473	596.692	2100.81	29.8269
474	1892.45	2658.23	62.4032			474	2325.99	2178.81	48.4638
475	1400.19	3008.69	51.5593			475	2082.57	1813.24	84.4557
476	2253.16	2253	130.522			476	2572.72	2772.36	104.656
477	569.875	2700.54	60.3929			477	815.869	2613.64	14.918
478	2444.28	1154.01	131.493			478	942.099	2964.79	45.6338
479	2048.09	1863.63	120.547			479	2285.61	2402.97	25.3803
480	1461.79	2797.38	91			480	3149.15	2673.68	73.65
481	1639.7	2525.98	87.5156			481	1644.36	2513.58	27.3333
482	1611.25	2496.5	27.15			482	2354.54	2308.24	55.4143
483	2437.21	1002.44	147.661			483	663.615	2395.72	6.97436
484	1884.94	2569.19	60.8125			484	1038.15	2230.98	115.283
485	747.895	2247.79	73			485	2389.32	1973.55	72.6667
486	2161.61	1223.22	157.407			486	1485	2936.06	6.77209
487	1519.05	2626.79	60.541			487	2097.33	952.719	114.684
488	406.317	2262.3	121.439			488	785.126	2436.93	96.4828
489	913.5	2244.29	66.2708			489	908.661	2148	28.3871
490	1276	2958.08	105			490	2065.5	1406.77	78.5484
491	685.702	2221.09	64.5088			491	2298.88	280.336	132.078
492	1945.26	2430.43	40.4412			492	2612.93	725.202	129.44
493	1941.65	609.025	155.512			493	1502.5	2254.79	51.4615
494	419.216	2696.33	38.6471			494	2290.87	2424.13	10
495	2245.64	569.818	120.47			495	2301.7	2390.67	12.7593
496	2062.1	1340.86	152.413			496	2268.29	2371.92	8.45205
497	1762.86	2624.63	73.4154			497	1248.21	2347.71	86.4545
498	1026.97	2264.2	59.4098			498	2621.74	2172.66	49.629
499	889.406	2325.81	100.464			499	2369.22	304.385	139.015
500	2327.12	2287.97	91.4576			500	889.472	2710.6	26.5972
501	2168.27	2698.74	77.4872			501	1466.13	2384.47	42.6833
502	1884.31	2248.03	68.5738			502	1029.42	2291.84	47.6909
503	2305.11	543.772	129.351			503	966.885	2424.33	50.7436
504	1430.51	2299.46	69.5902			504	2571.43	633.135	126.757
505	1812.83	2492.58	83.8491			505	2236.74	1198.88	111.429
506	1287.29	2835	116.444			506	883.086	3029.71	50.6286
507	2138	1694.28	104.26			507	1961.6	2474.64	30.56
508	2026.66	2609.58	125.484			508	1318.34	2363.3	65.3714
509	1624.96	2906.62	70.7083			509	762.507	2840.35	50.3803
510	672.057	2260.43	78			510	2160.8	1490.61	75.4881
511	1163.04	2456.55	47.3019			511	2584.56	2971.79	38.2033
512	2660.59	718.865	127.5			512	1032.53	2331.01	39.4658
513	1636	2927.07	101.514			513	1873.97	2808.22	38.3043
514	676.119	2242.66	114.463			514	2325.74	2312.95	12.6061
515	963.761	2416.3	57.2391			515	2273.84	1929.82	75.3871
516	1658.57	2358.7	67.5833			516	742.013	2808.56	22.4533
517	1455.18	2769.87	15.4096			517	1998.49	2207.52	73.7284
518	1498.32	2565.17	102.667			518	1992.74	2270.34	18.3538
519	2030.7	1552.72	105.367			519	1400.84	2302.95	41
520	1392.98	2396.07	76.386			520	2211.63	1206.25	89.3833
521	615.81	2306.98	75.3966			521	2395.24	2229.12	22
522	2047.36	183.777	158.596			522	1735.55	2556.21	15.4607
523	265.954	2418.06	167.852			523	514.347	2603.38	30.4167
524	636.302	2581.77	50.717			524	710.631	2195.42	91.4524
525	2252.06	1967.02	108.333			525	1927.92	2502.64	8.54054
526	956.596	2740	66.2979			526	1113.99	2374.83	31.4643
527	1699.21	2447.12	96.4394			527	2466.26	2200.74	50.4286
528	1986.25	2531.43	89.5692			528	2022	2461.9	83.3065
529	1620.83	2733.33	38.5			529	2329.62	967.011	133.448
530	2255.46	2120.85	76.6119			530	2625.81	2642.13	79.5696
531	748.722	2412.81	77.3889			531	624.651	2476.62	18.3651
532	1437.92	2937.31	88			532	1472.18	2203	35.3667
533	2314.83	596.961	130.519			533	2021.39	2833.29	70.8257
534	1507.74	2541.79	37.3585			534	2134.4	2493.4	101.397
535	2062.31	2113.32	93.5735			535	561.812	2175.88	41.125
536	1570.81	3072.81	28			536	916.015	2477.85	33.3333
537	1537.73	3018.44	129.508			537	2071.97	2484.74	82.4247
538	582.508	2706.89	48.5082			538	3164.24	2634.63	93.6271
539	2283.37	2598.47	54.661			539	2280.96	2129.28	49.4789
540	2340.7	2406.59	87.6429			540	2333.97	2389.93	11.05
541	786.2	2093.98	121			541	722.88	2070.64	64.4457
542	1673.95	3015.92	114			542	2457.06	2253.9	35.2041
543	1188.83	2812.85	146.567			543	2351.04	2352.19	51.6842
544	969.095	2765.32	142.603			544	796.987	2138.04	40.4744
545	400.232	2967.62	107.464			545	2219.8	1071.47	86.4737
546	593.675	2504.72	74			546	687.025	2791.67	17.4074
547	1550.65	2420.23	108.614			547	709.279	2286.08	98.3279
548	2381.65	517.629	140.323			548	496.987	2180.28	26.4605
549	1229.95	2692.73	45.2045			549	2244.36	2132.74	69.8723
550	891.269	2637.46	120.522			550	883.789	2425.76	43.5915
551	2266.62	2647.5	66.4697			551	1691.64	2281.14	25.8
552	1322.76	3060.76	35			552	2549.45	2087.45	58
553	963.867	3051.93	109.717			553	2571.94	527.182	101.468
554	2472.22	1046.28	129.338			554	2499.83	2370.53	17.2264
555	1035.62	2548.57	153.494			555	1616.62	2371.3	24.86
556	1787.49	3292.59	91.3636			556	1271.57	2186.38	58.5714
557	1440.87	2522.87	69			557	2406.13	2353.29	104.558
558	1325.66	2473.83	81.661			558	2436.56	2353.5	65.9167
559	555.968	3170.77	168.481			559	561.522	2149.85	22.1522
560	1554.02	2742.51	99.5238			560	2203.5	2801.3	55.2
561	949.153	2538.17	174.542			561	472.569	2249.76	20.2586
562	855.167	2879.01	155.512			562	867.014	2788.46	83.493
563	1234.06	2912.94	95.8			563	2465.85	2860.95	39.52
564	902.171	2575.83	141.571			564	953.447	2231.74	22.5658
565	1620.14	2937.78	103.379			565	1882.9	2830.26	57.2571
566	2278.92	1699.03	146.365			566	2201.96	299.889	100.019
567	1632.96	2638.69	63			567	2360.58	2869.61	34.3548
568	2239.86	279.605	161.434			568	844.07	2159.55	105.648
569	2041.99	2155.08	90.4805			569	735.361	2133.64	74.5556
570	2060.05	2199.16	86.4138			570	2412.88	1943.63	46.4179
571	1324.82	2555.67	68.4386			571	2420.1	2320.62	56.4583
572	1987.08	1035.63	141.52			572	1340.33	2310.98	22
573	717.617	2437.57	168.333			573	2477.13	2117.45	77.6833
574	1531.04	3076.79	24.3208			574	2465.76	2223	59
575	1247.52	2401.72	47.65			575	1029.54	2531	69.8519
576	2275.14	2710.66	102.466			576	763.926	2458.21	21.4118
577	1435.24	2611.64	56.74			577	2139.51	2213.13	8.56338
578	1445.16	2785.44	15.4355			578	2029.44	2473.33	96.0492
579	2072.16	1401.42	112			579	2438.72	2139.38	49.3125
580	254.167	2661.35	40.5128			580	1428.2	2703.14	42.4457
581	1669.55	2629.96	106.493			581	1922.42	2361.85	71.4459
582	1581.02	2967.61	67.4375			582	1983.61	2295.43	20.1522
583	2227.27	1661.19	107.559			583	659.679	2160.42	62.359
584	680.047	2216.62	153.625			584	3111.78	2755.77	106.384
585	829.014	2994.87	142.406			585	1624.78	2466.09	78.7593
586	796.977	2597.93	54.1364			586	725.803	2152.83	56.5
587	1617.88	2566.23	8.54688			587	1958.59	2716.32	69.2841
588	803.465	2494.6	72.2558			588	862.411	2768.09	49.5263
589	1587.03	2999.41	40.0769			589	847.382	2164.93	100.727
590	1029.48	3052.59	112.537			590	2196.55	2143.25	60.6462
591	1077.5	2441.6	150.386			591	2359.62	1650.16	75.7143
592	1305.31	2915.17	33.4714			592	1812.26	2511.59	82.6522
593	986.717	2201.42	92.3962			593	2409.19	2797.78	33.4805
594	1619.33	2567.31	78			594	1114.17	2336.34	49.2414
595	1380	2785.5	41			595	1066.32	2461.51	32.4933
596	806.727	2636.16	124			596	2445.49	2465.7	58.6087
597	1575.3	3137.86	84.4531			597	1099.44	2605.38	22.5775
598	1507.53	2406.81	53.2553			598	2224.78	348.367	99.7222
599	1513.79	2513.14	60.7857			599	886.829	2244.39	105.357
600	348.574	2194.56	70.4426			600	1858.19	2301.48	28.5443
601	1281.58	2392.14	90.5541			601	3215.43	2777.47	96.4699
602	1770.04	2676.23	116			602	2582.88	517.387	98.5867
603	824.784	2723.15	151.554			603	1906.76	2366.46	87.6056
604	2078.11	1824.62	138.379			604	2290.47	1666.2	106.421
605	1075.92	2511.45	76.5			605	2383.74	2564.52	40.5325
606	1585.84	2425.51	81.2653			606	2411.88	1487.51	109.488
607	682.943	2307.66	59			607	2519.97	531.151	101.5
608	2663.45	582.176	134.392			608	1189.06	2130.06	54.6471
609	1127.15	2841.25	152.415			609	2558.26	2295.32	26
610	700.84	2224.63	146.547			610	2052.47	1433.08	89.4384
611	844.489	2422.11	58.3191			611	1864.4	2428.36	72.6133
612	1679.08	2757.98	78.2308			612	2509.23	2276.14	76.6154
613	1004.1	2704.19	75.5254			613	2295.55	1091.66	129.39
614	2265.31	2185.41	93.3621			614	2201.46	1997.46	68.7037
615	1058.32	2434.66	83.4464			615	989.175	2491	30.6349
616	613.965	2565.46	72.3509			616	2318.65	2886.77	38.6056
617	1970.41	2340.34	159.632			617	1178.25	2568.72	122.556
618	1874.77	2546.37	116.452			618	1002.44	2420.64	111.52
619	2071.38	1211.74	147.515			619	2234.17	2595.21	14.5897
620	1381.82	3043.31	58.2444			620	2331.27	2193.39	20.6119
621	1952.17	3140.54	94.5571			621	2337.5	2075.79	71
622	1268.8	2461.96	63.5352			622	735.678	2507.56	80.5
623	592	2526.54	48.5254			623	1919.92	2191.75	55.4079
624	2073.89	639	131.333			624	1697.71	2925.8	89.4
625	1312.85	2677.32	83			625	2272.21	1300.51	99.7286
626	2078.89	2171.65	107.458			626	2455.91	2560.55	50.5676
627	1992.49	2446.09	106.553			627	497.333	2449.16	51.5467
628	1164.4	2497.99	119.529			628	2032.96	525.61	111.506
629	799.406	2673.8	95.4688			629	1051	2155.5	37
630	1549.54	2279.51	63.4754			630	2222.01	2540.57	67.3971
631	767.113	2731.37	127.563			631	693.38	2354.62	32.08
632	421.975	3190.15	159.519			632	1942.97	2586.41	39.6479
633	1779.26	2307.36	63.5797			633	2378.5	2240	47
634	1366.97	2728.97	129.464			634	843.623	2250.25	73.623
635	2307.25	2579.27	111.577			635	1779.32	2837.63	41.0806
636	1568.58	2529.05	50.5385			636	2231.09	2757.81	45.527
637	1902.24	2515.43	18.5429			637	1381.45	2252.17	38.4466
638	420.901	2384.21	100.507			638	558.976	2574.8	23.6098
639	2238.6	1802.21	108.448			639	798.386	2548.34	29.4286
640	1456.36	2859.21	20			640	1241	2744.35	60.4058
641	2665.41	2857.63	185.371			641	2833.82	2788.52	87.5211
642	2133.55	2709.97	169.45			642	1766.91	2228.8	40.3857
643	1450.87	2843	59.2391			643	1534.89	2387.41	48.2131
644	2376.12	2669.67	146.513			644	1907.04	2692.62	14.625
645	1728.47	2421.85	35.4324			645	2407.68	2837.79	45.45
646	1855.99	2995.72	103.52			646	1076.19	2484.68	126.271
647	1413.8	3026.07	104			647	1944.85	2802.88	28.4462
648	582.85	2241.72	97.1833			648	1092.81	2300.12	35.3913
649	1080.91	2467.83	73.1915			649	714.53	2711	77.3788
650	2405.02	618.059	174.255			650	2187.59	2149.39	60.5405
651	941.128	2737.19	55.7447			651	3050.71	2754.26	113.578
652	721.115	2151.75	161.361			652	896.667	2183.68	46.3485
653	670.746	2946.05	88.3175			653	2175.41	1104.33	118.439
654	2096.91	1711.08	94.625			654	2193.63	321.512	101.477
655	1411.17	3118.67	26			655	2205.08	2081.86	54.5
656	2194.92	611.483	124.6			656	2166.99	2532.14	88.5
657	1924.62	2407.58	57.45			657	1593.09	2672.47	87.5811
658	2154.3	2582.11	101.557			658	808	2339.6	27.411
659	2103.23	2301.18	88.6557			659	762.529	2559.74	84.3971
660	1828.47	2898.56	35.5325			660	2273.69	2766.69	31.3125
661	900.685	2768.5	87.6296			661	2406.66	1959.33	67.4375
662	1268.31	2739.9	22			662	818.933	2771.56	74.6
663	1974.28	2617.75	129.6			663	1750.05	2487.37	88.2712
664	2376.15	1084.68	130			664	2373.2	1142.26	106.55
665	1692.85	2671.38	114.358			665	2163.16	851.765	118.338
666	2287.85	2470.1	86.2308			666	2154.67	1220.55	114.547
667	2023.7	1634.97	120.47			667	2193.98	1649.66	80
668	1196.37	2573.39	47.629			668	2335.74	2517.99	25.4459
669	2356.57	2338.21	101.765			669	2232.08	2340.63	29.7115
670	778.607	2635.23	145.625			670	1909.92	2113.97	20
671	2484.22	1093.39	136.667			671	2315.6	1894.85	68.4328
672	2296.35	703.592	127.493			672	2310.5	2033.97	42.5833
673	2331.8	688.307	165.493			673	2144.43	2381.29	70.3393
674	363.746	2977.98	62.381			674	1574.97	2201.63	38.3333
675	501.162	2132.27	78			675	2358.52	2739.91	50.4938
676	2091.13	2292.02	62.6481			676	2286.74	2124.91	56.5135
677	2264.12	2343.06	74.75			677	1605.36	2255.91	49.6212
678	2402.14	885.962	164.525			678	2246.8	2113.46	93.6949
679	1372.18	2570.86	131.446			679	1989.01	2473.07	99.4079
680	1848.38	2356.85	13.4615			680	1117.64	2512.68	23.8868
681	2328.29	1074.77	162.196			681	2163.29	1808.54	114.459
682	2004.49	3116.3	115.507			682	677.25	2266.74	70.55
683	1549.19	2597.28	5.44444			683	2192.05	1881.71	95.5658
684	2228.18	2353.28	144.316			684	2340.78	2235.5	77.5278
685	1196.53	2603.85	119.679			685	1081.87	2380.36	101.629
686	1450.27	2971.46	16.6538			686	1259.02	2364.26	37.7586
687	1935.92	2715.46	44.5211			687	2134.58	1687.11	116.554
688	1554.52	2314.4	58.4			688	506.759	2691.41	42.5949
689	1469.26	2871.19	124.704			689	2265.6	2208.58	8.16
690	2219.76	1117.37	131.471			690	639.188	2144.35	97.4688
691	572.167	2547.35	96.5278			691	859.38	2658.65	84.1646
692	276.471	2488.63	34.4286			692	895.28	2398.6	105.573
693	1262.87	2974.51	40.5263			693	2461.85	703.987	113.513
694	1123.38	2474.32	104.446			694	1189.51	2644.86	50.5294
695	1425.54	2773.07	15.4179			695	2020.42	2361.16	29.6727
696	1138.06	2531.33	61			696	1729.59	2342.96	83.5176
697	1380.96	2747.86	126.507			697	2260.85	279.864	105.786
698	1006.03	2770.61	81.5143			698	1171.14	2205.44	54.2281
699	2529.25	778.592	134.606			699	1603.27	2179.39	37
700	2144.68	410.932	114.39			700	2382.84	2300.2	90.9556
701	1616.22	2897.95	131.569			701	878.87	2314.94	101.652
702	2385.06	1423.61	149.62			702	1183.94	2465.52	45.5584
703	378.109	2642.25	109.327			703	530.333	2350.56	15.3788
704	1022.03	2545.45	66.6034			704	517.551	2562.1	50.5385
705	2121.06	1636.87	108.5			705	866.427	2536.8	25.5867
706	1301.63	2981.71	93.2653			706	792.47	2860.04	72.506
707	2425.75	941.441	157.368			707	1030.79	2702.19	93.4778
708	810.431	2347.03	81.3966			708	2688.58	2921.73	150.349
709	1982.62	2214.72	71.4333			709	2601.28	2978.59	37.9942
710	1501.19	2576.68	107.679			710	957.013	2916.32	59.4474
711	2046.55	2374.39	124.641			711	2587.72	476.329	126.5
712	2095.42	384.299	164.582			712	1560.31	2606.81	77.6613
713	303.536	2636.34	74.2679			713	2551.08	622.455	137.667
714	1588.16	2462.94	75.4194			714	2512.49	2240.83	22.1064
715	454.508	2358.68	85.4286			715	2318.94	2131.98	61.4219
716	845.246	2251.77	101.536			716	3050.82	2583	74.5526
717	466.754	2339.91	88.3333			717	1604.69	2463.06	53
718	2070.16	2323.79	15			718	1991.04	2079.94	24.88
719	597.077	2276.89	141.492			719	2315.62	967.728	126.593
720	1747.86	2491.86	100.362			720	1597.64	2443.89	34
721	2315	2555.92	80.4595			721	1853.31	2485	100.471
722	1710.34	2343.85	55			722	2143.94	2509.57	33.2381
723	1467.83	3151.85	58.2609			723	596.085	2155.12	34.6271
724	1947.59	2106.19	161.547			724	1202.9	2407.03	95.3973
725	2492.96	758.071	140.571			725	2443.74	228.235	136.926
726	2404.39	2338.59	99.4891			726	2228.41	1101.17	86.6949
727	1025.79	2361.83	87.283			727	818.259	2190.45	43.1724
728	2220.67	2146.26	108.404			728	1377.91	2304.68	39.473
729	1368.31	2804.05	59.881			729	730.969	2442.4	7.72308
730	1489.65	2521.48	76.4833			730	1884.45	2300.05	5.56627
731	777.329	2403.49	90.6027			731	635.364	2254.61	22.4416
732	1508.85	2500.75	18.3636			732	2439	2809.2	60.5059
733	435.377	3078	77.6393			733	1143.53	2118.4	48.2182
734	1475.92	2879.75	10			734	2204.24	412.824	131.635
735	1460.62	2369.1	38.3462			735	741.448	2711.38	42.7069
736	1255.92	2844.55	141.547			736	1097.25	2260.56	20.5588
737	204.317	2490.85	52			737	1765.65	2672.59	73.4941
738	550.29	2685.52	75.5			738	2377.44	2806.62	94.5
739	2136.96	1809.41	102.321			739	2534.18	2674.47	38.4125
740	1926.77	3000.5	91.5303			740	3199.12	2670.77	85.3158
741	1074.15	2746.33	97			741	2637.64	414.391	102.188
742	799.489	2495.91	77.3333			742	529.279	2089.23	32
743	1306.16	2711.93	116.714			743	2491.67	363.257	104.414
744	732.969	2966.31	125.446			744	2111.85	1231.56	88
745	1295.92	2552.8	26			745	1317.14	2672.17	39.7586
746	681.575	2437.95	68			746	2176	555.282	135.482
747	1021.29	2259.49	84.4237			747	2235.25	1831.18	103.476
748	1634.06	3001.44	59.5286			748	1680.08	2535.56	43.3281
749	1309.33	2644.19	100.36			749	2114.85	1304.43	75.5405
750	2037.17	2802.77	116.529			750	1279.02	2387.58	48.4091
751	1365.5	3088.5	47			751	1866.97	2570.77	19.3594
752	629.26	2304.69	178.571			752	2213.05	305.352	99.6857
753	2041.77	2378.69	15.5325			753	2364.95	2262.03	59.48
754	884.373	2521.4	91.5373			754	1962.09	2441.65	70.5114
755	1483.78	2989.56	109.452			755	2476.7	2497.03	22.7
756	2525.72	2836.65	124.443			756	797.889	2366.44	13.7222
757	2247.58	2675.89	58.5556			757	2575.42	372.095	108.135
758	2225.22	272.675	151.987			758	2217.96	719.829	103.586
759	1675.51	2710.68	95.5714			759	1202.7	2512.44	105.741
760	513.202	2881.25	149.528			760	1688.91	2493.58	66.9333
761	1558.19	2507.58	56.5955			761	635.75	2124.9	43.4118
762	1901.62	2237.62	68.1429			762	762.319	2292.39	33.5972
763	2337.48	2698.19	100.562			763	2990.72	2789.95	96.4474
764	1655.61	3000.18	125.386			764	2510.01	2283.31	27.5181
765	1543.55	2376.9	91.4783			765	614.104	2136.66	27.403
766	1659.07	2851.31	93.5932			766	846.096	3041.37	130.603
767	1387.9	2801.95	71.5323			767	809.478	2483.51	79.597
768	1085.37	2603.36	116.441			768	1976.38	2361.68	84.875
769	1533.76	2848.06	41.7778			769	2480.78	638.391	119.517
770	1512.15	2760.27	100.52			770	2277.17	388.284	116.193
771	2290.29	2139.17	94.5692			771	1252.77	2266.9	58.5422
772	2118.27	2060.39	87.3529			772	2315.36	2104.27	65
773	1650.79	3023.9	76.5			773	1649.91	2251.22	35.5938
774	2159.85	489.167	118.367			774	1919.5	2311	62.2826
775	1449.92	2479.36	51			775	943.797	2734.26	47.5676
776	1157.08	2352.92	81.7115			776	931.971	2179.8	33.6143
777	529.026	2923.92	76.4737			777	2989.19	2627.33	94.8246
778	1262.73	2433.73	67.6964			778	2219.26	2241.85	86.6324
779	484.06	2747.67	74.5672			779	1855.38	2620.1	52
780	2126.91	1264.16	144.556			780	1332.54	2439.46	60.6197
781	2169.11	2841.8	157.439			781	2089.62	671.256	118.439
782	1092.93	2703.5	120.119			782	2128.02	557.817	112.3
783	2137.32	1711.68	99.6667			783	551.783	2571.67	23.5652
784	936.597	2765	142.387			784	372.962	2622.05	27.5385
785	1626.1	2608.47	128.735			785	2328.68	604.685	149.467
786	2199.38	1910.25	141.283			786	780.822	2247.74	94.5342
787	2575.96	2859.89	121.494			787	2269.71	307.506	125.427
788	2334.47	1436.4	148.514			788	2294.47	2626.72	28.3281
789	623.627	2613.56	174.254			789	2182.56	2268.98	10.92
790	2073.26	2647.43	93.5217			790	1320.26	2576.34	91.4588
791	1845.84	2308.43	89			791	2449.33	2132.33	31
792	1859.91	2732.15	101.485			792	1280.53	2533.9	104.4
793	2358.16	456.072	137.494			793	581.663	2646.11	37.4337
794	2562.04	2994.62	158.522			794	2271.58	1498.17	71.5833
795	2241.6	1768.61	148.471			795	1292.12	2636.59	42.7031
796	1512.03	2378.08	24			796	2208.35	1467.77	122.518
797	1938.7	460.925	121.388			797	2126.08	2145.55	68.4471
798	1481.71	2945.34	128.443			798	3045.95	2858.32	83.9365
799	2542.34	841.735	136.618			799	502.194	2172.29	30.5139
800	2085.15	2238.82	115.59			800	1554.69	2682.9	29.5055
801	2143.17	2153.43	105.533			801	1089.99	2741.11	61.6
802	2130.39	1524.82	120.614			802	2195.28	2305.49	55.4225
803	2137.6	2496.47	105.645			803	996.814	2162.55	111.453
804	1816.55	2596.99	120.612			804	2431.09	2813.24	44.9111
805	1536.14	2891.96	75.3188			805	2321.92	2394.69	9.56471
806	1044.23	2348.18	92.4098			806	754.243	2499.51	19.6286
807	2268.64	2756.7	116.425			807	1024.73	2526.02	24.7857
808	734.766	2587.85	107.224			808	2058.94	2451.01	67.1875
809	1886.41	617.145	146.464			809	1320.33	2398.03	48
810	1543.75	2586.02	65.6667			810	2115.03	1448.41	111.609
811	2104.67	2432.02	49.3509			811	2092.3	1186.07	88.5205
812	719.234	2217.12	122.506			812	1995.95	2615.73	35.3896
813	1891.23	2482.34	17.6792			813	2354.86	2035.98	61.4127
814	1861.69	3044.61	93.5156			814	2479.27	2159.96	65.5811
815	2383.99	650.558	162.519			815	2320.18	1948.55	38.7742
816	2143.49	2321.08	95.5455			816	1814.03	2538.25	48.35
817	2133.74	1992.53	111.426			817	2238.14	2559.35	34.186
818	1478.29	2817.02	113.049			818	2376.19	2156.28	45.8085
819	2300.84	831.72	125.48			819	2484.04	2037.94	50.7255
820	2000.51	315.32	127.507			820	2613.43	2440.47	39.7
821	1450.59	3139.83	80			821	459.736	2554.47	14.375
822	2717.17	2879.74	157.468			822	2207.6	2014.92	70.5846
823	529.865	2727.62	45.973			823	2326.85	2071.8	69
824	902.554	2605.75	81.3214			824	1529.86	2715.48	52.5294
825	1201.18	2673.53	119.455			825	2093.52	1958.7	100.612
826	1616.54	2606.5	106.685			826	825.297	2608.78	16.6216
827	2218.87	1765.39	117.58			827	873.366	2188.11	64.2958
828	1850.29	2732.5	120.5			828	2216.95	241.945	118.033
829	2345.71	2913.5	142.471			829	2519.28	3006	55.474
830	2561.74	562.83	129.226			830	2179.54	2003.86	77.4405
831	584.893	2937.19	100.493			831	728.364	2381.91	25
832	1699.38	2736.46	135.541			832	1468.6	2737.26	74.575
833	924.016	2342.7	143.594			833	2088.93	1532.81	90.4932
834	983.212	2409.79	64			834	2376.79	1784.6	101.5
835	1391.74	2568.9	109.6			835	2190.56	2192.77	77.2115
836	2117.62	2278.21	141.413			836	1005.63	2492.76	109.467
837	1915.47	375.21	139.444			837	2582.91	2329.56	18.4242
838	808.463	2452.43	131.493			838	2352.31	1424.6	114.611
839	2188.93	1406.16	122.368			839	734.726	2174.48	46.3548
840	1582.04	2657.72	66.2174			840	1670.99	2322.89	66.4267
841	680.873	2746	142.709			841	2206.1	2491.5	28.2647
842	2484.98	720.792	168.642			842	1951.34	2485.8	45.5429
843	823.47	2889.14	144.53			843	3252.57	2678.8	77.481
844	2029.56	2256.02	72.7091			844	1329.38	2432.54	66.4737
845	2383.3	798.554	141.25			845	2364.1	2493.06	70.4478
846	1811.8	2677.02	120.235			846	2529.04	2114.33	65.589
847	801.087	2191.25	74.5072			847	2890.5	2907.33	130.561
848	2047.1	2664.14	67.4603			848	2158.47	2826.9	79.4675
849	1162.15	2864.58	60.5493			849	1215.28	2349.43	99.4412
850	1445.99	2575.28	90.4079			850	1008.69	2470.01	129.47
851	2584.68	2555.62	163.378			851	2284.37	2215.79	28.7
852	1397.29	2609.9	129.621			852	1555.1	2724.41	31.561
853	2148.53	1957.31	95.2542			853	2213.63	1191.06	125.647
854	2189.28	1242.09	160.575			854	2225.74	1431.37	75.4568
855	2536.47	803.807	153.316			855	1865.77	2282.69	7.53488
856	1837.54	2433.31	73.4038			856	624.204	2123.37	27.1837
857	2249.62	573.436	175.256			857	1031.97	2280.32	100.682
858	2454.68	871.476	136.413			858	1879.99	2325.59	14.525
859	969.716	2390.91	69.5224			859	948.29	2347.68	88.3226
860	1777.7	2728.45	108.585			860	1322.11	2708.23	85.4881
861	2016.54	2785.63	129.371			861	2358.07	2343.78	11.0244
862	1990.4	486.558	164.597			862	1714.87	2154.93	36.2727
863	2134.11	3148.88	115.467			863	2372.58	1490.24	84.4516
864	1073.67	2483.03	129.65			864	2888.41	2978.83	137.286
865	1682.63	2515.37	99.3704			865	712	2820.06	38.3286
866	1218.33	2931.6	111.553			866	732.969	3028.11	47.7188
867	1784.95	3213.08	102.644			867	1105.11	2266.78	108.554
868	577.191	2283.85	85.4559			868	836.129	2493.33	46.5
869	2046.59	2838.49	68			869	2350.6	1724.59	75.4286
870	2188.21	2680.44	160.56			870	912.4	2325.03	55.6
871	504.012	2815.59	140.523			871	1971.6	2334.6	67
872	1181.6	2853.26	141.629			872	2335.41	1542.21	77.7241
873	1689.5	2611.65	39.3043			873	581.957	2906.76	48.8857
874	759.052	2163.9	126.569			874	935.212	2294.35	113.667
875	789.686	2643.55	130.314			875	2252.37	2259.46	8.17308
876	703.633	3078.48	151.456			876	2457.94	2004.69	43.4154
877	699.083	2806.28	163.458			877	786.07	2477.63	36.5493
878	503.731	2468.85	129.388			878	831.194	3052.15	87.375
879	2316.93	564.926	121.494			879	2293.51	2397.13	39.5263
880	1189.01	2980.33	106.627			880	787.214	2507.1	5
881	2071.27	1280.77	137.283			881	1990.6	2743.48	34.5974
882	2070	1564.6	106.521			882	2194.27	2401.86	73.4872
883	1581.05	2618.22	108.417			883	814.392	2389.7	85.5405
884	2201.18	2647.79	44.4605			884	2467.57	2960.3	65.6456
885	1429.23	2831.73	30.5584			885	2609.81	502.56	110.493
886	1869.41	2251.28	56			886	777.358	2206.06	48.2075
887	2099	2827.48	106.597			887	1004.48	2170.29	94.8269
888	2557.32	725.439	164.439			888	2475.85	2434.12	32.5811
889	1335.74	2852.41	79.3043			889	1038.2	2207.41	34.56
890	2077.53	699.083	155.486			890	1182.47	2127.68	48.4744
891	1341.09	2469.91	38.8043			891	1806.62	2321.53	87.5063
892	2202.2	483.15	111.35			892	1630.89	2460.73	75.6515
893	1955.27	2194.77	88.5122			893	1653.78	2191.51	20.1224
894	1417.34	2590.93	106			894	2234.1	1918.28	80
895	370.283	2096.13	87.2453			895	1445.69	2479.77	28.4872
896	2381.51	324.746	149.403			896	518.694	2328.44	31.2581
897	2085.79	2134.13	101.571			897	1465.94	2652.88	31.5641
898	471.27	2141.89	71.4603			898	2166.46	2141.32	93.5
899	1785.26	2648.25	101.528			899	1664.89	2705.63	43
900	2142.88	2278.08	71.74			900	2265.32	2247.26	40.6462
901	2158.69	2391.61	95.5647			901	1097.7	2366.76	54.3016
902	2246.85	1288.7	151.5			902	1174.9	2687.38	85.5942
903	2312.04	2268.1	112.518			903	2289.35	878.837	104.388
904	1703.48	2393.52	88.5211			904	2355.43	1703.83	84.5833
905	1869.01	3063.28	132.474			905	770.433	2528.9	40.3284
906	1742.9	2592.11	45.5375			906	694.467	2682.9	44.3
907	2154.94	1445.68	129.591			907	423.704	2518.21	30.4366
908	408.099	3047.45	120.606			908	843.621	2150.12	79.6364
909	1420.3	2990.05	95.6406			909	2322.86	1785.29	66.8776
910	518.253	2462.59	151.519			910	543.435	2688.96	6.68116
911	1323.07	2864.69	61.1429			911	753.585	2167.13	104.524
912	2115.92	2366.89	43.5			912	1180.96	2757.01	89.2078
913	1584.1	2714.71	14			913	1806.64	2738.99	100.538
914	836.2	2623.96	91.4			914	2125.29	2335.07	54.8889
915	411.159	2119.48	81.5556			915	2184.87	2269.43	99.7778
916	2011.97	2040.05	163.631			916	1735.19	2415.7	93.475
917	2211.51	651.333	151.619			917	2102.39	2522.77	80.3548
918	875.135	2789.12	139.25			918	2142.41	2244.04	8.33929
919	867.134	2416.6	92.4925			919	2502.28	994.722	112.304
920	376.139	2456.61	91			920	837.528	2279.9	21.4444
921	1009.62	2442	113.25			921	2099.27	2227.71	5.4
922	2238.62	639.741	137.69			922	1327.58	2346.4	29.6875
923	1515.51	2905.97	38			923	1554	2771.32	49.84
924	1584.54	2752.57	67			924	2094.53	2741.78	33.5176
925	2124.22	2376.29	120.472			925	2098.12	267.659	134.459
926	604.362	3155.34	121.259			926	2113.66	2446.09	77.5443
927	1349.81	2878.47	125.111			927	2948.94	2830.59	111.391
928	693.032	2118.85	128.355			928	2468.27	2175.13	87.5641
929	2038.71	1623.02	109.582			929	2567.18	2628.41	103.419
930	908.026	2455.21	68			930	1350.97	2396.72	29.5063
931	2748.49	3004.68	147.598			931	2019.02	2670.32	55.2203
932	1402.56	2850.17	54			932	2377.33	1926	62.0889
933	2626.19	553.411	142.384			933	2426.08	188.223	129.126
934	1157.23	2936.98	98.5455			934	2126.72	1910.72	119.471
935	1680.89	2845.03	76			935	790.971	2107.89	41.6143
936	1518.08	2675.95	68			936	1469.53	2531.9	71.7647
937	1124.88	2782.19	77.4655			937	554.329	2398.79	40.5342
938	1378.97	2739.32	85			938	2562.42	510.167	133.551
939	2427.35	2532.11	140.55			939	1267.11	2585.71	97.875
940	2441.98	617.37	164.25			940	2074.27	1338.49	82.2727
941	2087.13	394.24	121.467			941	3198.64	2889.1	107.363
942	1067.19	2396.5	116.594			942	2306.62	2476.38	16
943	1572.62	2398.79	66.9048			943	766.042	2445.56	32.6761
944	1375.15	2692.24	110.537			944	2443.67	2255.98	36.3939
945	1999.07	1240.31	148.493			945	2938.77	2695.31	72.3594
946	2185.78	737.836	128.589			946	2404.44	1605.82	104.439
947	2058.38	2831.32	59.6			947	2328.66	1273.5	118.477
948	1715.72	3108.1	53			948	1169.09	2320.69	31.2615
949	1833.22	2515.83	130.422			949	1654.48	2200.9	49.6721
950	630.585	2737.83	130			950	1876.04	2428.8	12.7551
951	1844.1	2397.34	91.3448			951	2184.52	2399.21	67.5325
952	1360.66	2677.28	88.4462			952	1453.81	2312.7	23.45
953	2156.24	986.25	143.579			953	1668.91	2286.31	23.6481
954	1518.66	2654	64.6034			954	1125.66	2302.99	102.411
955	1140.22	2645.52	88.8043			955	2251.49	2441.14	34.5915
956	1070.77	2415.36	58.766			956	2376.05	2463.82	95.3182
957	2394.76	1006.41	149.474			957	2250.32	2077.36	62.2264
958	2185.98	2273.56	77.6852			958	2634.55	482.27	111.581
959	2012.13	2470.02	113.259			959	2086.06	2327.46	78.7407
960	438.158	2857.61	151.474			960	1673.63	2460.21	88.7302
961	2053.96	2907.06	129.375			961	1025.45	2123.72	69.7077
962	2399.78	651.753	138.506			962	688	2301.45	93.4156
963	1659.75	2746.52	54.5385			963	2815.76	2799.24	78.6552
964	1493.31	2651.59	60.431			964	1981.88	2208.51	41.4459
965	587.617	2818.42	114.633			965	2212.55	1832.08	66.8367
966	1768	2670.4	91.4627			966	2098.68	2337.81	53.6032
967	1626.6	3246.21	71.4693			967	1525.53	2394.46	29.5062
968	1982.56	2600.79	32			968	2070.56	2273.52	84.6923
969	828.441	2232.75	68.4237			969	1963.86	2771.8	40.4242
970	1755.3	2525.44	102.72			970	445.825	2522.3	26.193
971	1512.49	2983.88	12.3265			971	2504.85	2446.59	76.6456
972	1524.57	2311.05	78			972	2218.59	2163.15	22.4324
973	888.235	2863.88	152.588			973	2183.08	2335.46	57.4068
974	1489.14	3025.4	34.6316			974	2215.67	2729.39	25.1343
975	1730	2989	43			975	2201.76	403.47	145.303
976	2288.11	2096.93	82.6667			976	2502.14	640.819	119.458
977	604.606	2588.35	95.6667			977	1344.12	2401.14	92.5349
978	1705.31	2765.58	94.6346			978	747.181	2402.93	59.9167
979	920.792	2540.74	54.3208			979	1891.56	2596.23	40
980	789.727	2159.73	141.327			980	2530.35	2427.94	37.5797
981	1864.5	2307.17	98			981	1539	2635.71	55.6027
982	1024.8	2434.63	167.474			982	983.618	2204.26	31.4474
983	2076.73	2409.92	133.587			983	920.9	2511.95	68.7333
984	1687.44	3050.69	93.339			984	1781.34	2412.14	53.7077
985	2701.6	2665.82	143.5			985	1640.91	2269.38	35.5735
986	948.065	2527.02	98.3261			986	544.521	2272.02	21.9167
987	2157.83	2302.46	144.446			987	553.762	2410.1	26
988	2146.55	2467.94	63.7447			988	1006.45	2261.39	26.6061
989	642.721	2501.57	163.544			989	2330.47	1420.26	87
990	1271.14	3103.97	103.424			990	1710.39	2510.73	14.519
991	1290.43	2885.74	103.414			991	1751.26	2573.58	18.5176
992	2338.96	2250.89	112.532			992	2230.94	1840.12	85.5309
993	327.737	2779.54	52.6842			993	861.889	2995.16	30.5444
994	2142.89	530.266	158.562			994	1890.3	2499.58	78.3594
995	1862.96	2936.69	31			995	2111.57	2589.78	100.385
996	1057.6	2396.74	60.2381			996	3138.37	2886.63	98.4737
997	2219.97	1025.41	165.705			997	2281.94	2322.58	62.4235
998	2087.59	2014.19	113.625			998	1812.64	2415.91	83.5432
999	333.929	2564.21	33.9762			999	2238.72	1441.57	76.7069
1000	359.35	2849.25	95.5375			1000	1948.29	2121.52	24.4
1001	1863.52	2562.88	100.339			1001	1870.61	2517.01	59.4595
1002	447.83	2947.45	59.3208			1002	1958.51	2759.62	59.7971
1003	403.727	2513.17	142.466			1003	2041.68	2548.81	65.7654
1004	1560.72	2343	59.569			1004	1203.88	2742.64	46.5733
1005	2171.02	1667.86	111.159			1005	1746.65	2624.87	35.4416
1006	2090.35	2305	107.727			1006	2569.3	2680.04	99.3188
1007	1104.82	2852.89	131.527			1007	2542.29	2603.36	54.6104
1008	1394.72	2324.02	66.7442			1008	1057.42	2349.49	40
1009	671.861	2575.61	72			1009	1803.91	2168.83	35.1481
1010	2164.05	2186.63	92.7442			1010	3030.85	2578.76	126.506
1011	1458.88	2846.6	84			1011	643.229	2899.17	52.0429
1012	959.697	2607.64	76.7763			1012	703.296	2336.28	14.4507
1013	2180.07	360.928	167.494			1013	2226.95	1849.84	110.506
1014	2608.05	819.8	136.291			1014	2405.73	2155.18	21.7143
1015	1421.24	2318.24	46.5224			1015	825.381	2578.64	21
1016	882.394	2466.71	107.5			1016	2509.87	631.026	117.385
1017	1952.62	3040.71	96.4			1017	959.312	2293.88	92.4
1018	677.579	2277.11	96.6316			1018	1565.07	2316.32	35.0244
1019	1365.84	2903.38	18			1019	2410.34	2261.65	74.6029
1020	1296.46	3018.04	89.6418			1020	2364.32	1146.89	93.625
1021	2686.85	693.932	142.527			1021	2399.22	2224.22	14
1022	1942.58	2669.24	36.6567			1022	1239.26	2722.6	46.6
1023	486.508	2939.16	113.587			1023	2547.1	2421.95	88.3871
1024	1231.32	2780.2	140.462			1024	648.82	2188.39	32.5393
1025	2045.74	1186.09	143.603			1025	2369.16	2709.81	39.6912
1026	2087.86	3148.28	125.487			1026	1103.58	2748.63	78.4699
1027	1716.92	3102.53	127.411			1027	792.432	2371.14	112.477
1028	1512.32	3111.2	83.5072			1028	1017.88	2247.35	51.4459
1029	1971.24	2490.53	74.4242			1029	3397.61	2681.57	88.9036
1030	558.529	2931.2	161.4			1030	2170.8	1334.89	105.467
1031	2380.92	2388.63	116.339			1031	1844.8	2439.59	17.6964
1032	479.25	2532.2	56.65			1032	2222.82	2625.65	87.5647
1033	1450.67	2369.84	83.4478			1033	1594.19	2456.54	53.2373
1034	1153.06	2290.14	95.3968			1034	467.8	2588.05	24.4533
1035	1340.14	2429.18	80.6842			1035	2217.75	2349.48	31.5625
1036	2002.8	1333.04	146.541			1036	2336.07	2348.33	102.362
1037	1962.41	557.534	159.452			1037	1958.73	2413.96	35.5714
1038	1986.89	2644.11	78			1038	3296.87	2708.54	90.4286
1039	1295.25	2331.99	85.4638			1039	1888.8	2691.44	46.6479
1040	343.127	2896.11	145.456			1040	560.615	2095.04	42.5495
1041	1552.92	3117.54	51			1041	3052.45	2957.92	119.4
1042	2345.29	432.946	118.714			1042	2192.08	432.466	144.534
1043	358.869	2759.48	69.6066			1043	1151.46	3176.21	18.8596
1044	2291.89	1411.21	147.435			1044	973.755	2419.45	52.2642
1045	556.804	2991.48	91.3214			1045	1794.61	2823.67	60.6818
1046	966.6	2636.38	147			1046	2346.86	1683.6	60.5714
1047	1573.79	2540.45	40			1047	863.328	2332.52	32.5821
1048	2553.68	494.029	146.632			1048	2124.5	2754.29	57.4211
1049	408.87	2346.04	92.4675			1049	1173.89	2485.73	25.5155
1050	896.265	2499.29	59.5294			1050	2626.54	2659.86	85.4459
1051	2084.55	1154.45	154.656			1051	1286.58	2161.02	49.9778
1052	2026.7	1771.06	124.475			1052	658.521	2551.66	44.4225
1053	627.917	2832.24	119.5			1053	2328.13	2451.53	93.4853
1054	2454.49	324.468	146.571			1054	2037.44	2645.76	54.8
1055	2305.24	1395.4	139.379			1055	1262.16	2539.12	48.2656
1056	2135.52	2713.77	33.6721			1056	775.156	2424.58	97.4889
1057	949.909	2642.27	167.455			1057	1726.46	2735.11	34.2951
1058	1527.42	2290.73	49.4839			1058	1212.97	2114.98	35.8033
1059	1413.62	2912.38	119.2			1059	898.12	2793.87	57.24
1060	1175.72	2390.26	68.4706			1060	2409.92	2403.15	84.7865
1061	2208.66	2839.9	84.6765			1061	3142.94	2889.54	92.4368
1062	398.22	2417.22	109.424			1062	989.39	2190.07	50.5732
1063	2410.64	774.328	157.594			1063	1193.42	2354.16	48
1064	588.75	2920.62	127.512			1064	3069.02	2517.13	78.4878
1065	532.689	2536.85	117.5			1065	2473.18	273.781	111.945
1066	710.814	2097.75	110.644			1066	949.07	2443.31	96.5775
1067	1646.32	2371.9	38			1067	2596.88	2483.79	72.3509
1068	2621.98	2790.62	128.259			1068	2228.08	2370.73	24.44
1069	1912.44	235.73	151.286			1069	940.573	2384.32	111.52
1070	1367.92	2631.83	117.519			1070	2493.06	326.078	124.733
1071	2492.2	816.591	175.394			1071	851.122	2496.59	59.4756
1072	1808.61	2441	54.0909			1072	2610.67	2900.94	99.6567
1073	1513.02	3055.2	85			1073	2302.66	1916.39	67.6119
1074	942.34	2828.57	111			1074	2904.39	2967.73	88.5455
1075	2086.44	1466.03	125.548			1075	1005.46	2431.21	42.5915
1076	2579.68	552.671	124.466			1076	792.377	2675.28	21.6721
1077	1494.62	2301.29	65			1077	835.452	2635.1	46.5484
1078	2199.88	1090.97	131.328			1078	2318.58	2230.25	63.5238
1079	2377.16	2485.7	101.14			1079	2282.44	2011.37	69
1080	2196.98	1168.81	170.397			1080	658.235	2269.63	35.4691
1081	571.676	2086.07	99.5211			1081	2210.9	2212.24	56.7755
1082	2274.81	3009.09	168.387			1082	1284.15	2259.93	24.4189
1083	796.459	2226.39	93.5902			1083	713.225	2677.24	71.475
1084	2100.02	2409.02	112.644			1084	2349.25	2397.14	34.5395
1085	2325.52	773.806	173.478			1085	2233.39	2347.12	7.61194
1086	1696.91	2470.16	124.5			1086	2226.05	2533.32	41.589
1087	1304.58	2736.16	94			1087	688.617	2464.02	35.8298
1088	1237.19	2509.91	67.7925			1088	2358.6	2891.94	36.1887
1089	2129.08	738.286	118.265			1089	1409.07	2763.32	73.6029
1090	1300.53	2749.28	23			1090	2432.8	1088.88	117.5
1091	1443.06	2350.89	71			1091	2065.79	2226.94	41.439
1092	1626.95	3039.57	93			1092	1185.47	2571.1	64.1176
1093	1915.7	2285.42	10.32			1093	664.952	2193.29	89.7581
1094	1033.02	2308.39	130.951			1094	2523.63	2381.99	86.3284
1095	1668.3	2741.05	64			1095	2200.36	621.747	124.47
1096	2279.8	418.543	156.486			1096	1928.23	2510.83	66.283
1097	2438.49	3014.06	158.245			1097	2397.77	2486.23	68.5783
1098	2520.14	629.985	165.379			1098	2482.88	2550.87	54.3
1099	1987.17	2322.47	139.678			1099	1849.46	2222.86	43.4342
1100	1701.89	2838.21	28			1100	2594.48	539.554	120.786
1101	1724.66	2493.31	125.69			1101	696.547	2614.55	43.6133
1102	2159.82	2654.92	71.3137			1102	2857.27	2957.14	94.2958
1103	1897.55	2688.88	104.517			1103	2496.28	2571.42	53.6667
1104	1609	2544.5	45			1104	1720.13	2820.13	46.7308
1105	466.136	2611.23	57.4394			1105	707.59	2868.87	57.7213
1106	1465.34	2509	74			1106	2230.64	666.364	120.667
1107	1755.14	2762.3	19.4386			1107	3084.89	2737.21	106.179
1108	1757	2695.16	137.661			1108	1491.33	2297.75	62.9375
1109	1398.35	2405.66	45.5385			1109	2644.71	2520.99	76.5921
1110	2084.56	2536.22	97.4026			1110	867.289	2221.72	119.511
1111	2035.43	2432.89	111.54			1111	2317.82	2198.68	48.7955
1112	591.389	2310.28	156.486			1112	2463.11	2787.93	47.4267
1113	2062.08	2085.38	85			1113	2411.92	2004.33	43.5972
1114	1411.97	2998.68	61.8919			1114	3006.57	2745.16	71.4684
1115	1467.02	2570.98	4.65			1115	2944.65	2934.36	109.573
1116	2179.36	332.408	133.487			1116	2684.87	2990.73	126.587
1117	2070.03	2468.76	110			1117	527.294	2826.67	16.5059
1118	856.266	2246.42	87.4844			1118	2334.74	449.333	95.5802
1119	1771.08	2657.32	25			1119	576.366	2128.55	18.4366
1120	686.845	2842.81	72.6207			1120	439.136	2618.9	17.6543
1121	388.981	2421.7	45.3704			1121	900.393	2912.25	104.978
1122	2588.13	3080.66	153.468			1122	836.53	2405.18	100.576
1123	1062.13	2304.8	62.7037			1123	783.906	2220.17	51.5781
1124	2270.23	2528.8	93.4615			1124	2737.96	432.737	104.5
1125	1399.64	3039.4	123			1125	2423.08	843.151	117.512
1126	1356.18	2581.36	55.4545			1126	1377.33	2350.18	52.9778
1127	729.353	2500.32	182.494			1127	1931.68	2580.31	48.4943
1128	1653.61	2829.5	61.4688			1128	2033.47	2544.93	10.3971
1129	1537.24	2590.03	42			1129	2060.81	2217.81	84.3871
1130	415.077	2779.15	88			1130	595.302	2524.29	14.4767
1131	1167	2397.69	77.4355			1131	1843.66	2578.76	65.5
1132	420.68	2990.11	75.4933			1132	3015.81	2546.03	110.526
1133	704.111	2345.5	73			1133	2704.88	2944.17	108.44
1134	2408.37	369.789	150.535			1134	2192.72	2104.76	77.8333
1135	2389.02	910.891	126.691			1135	733.779	2515.88	33.5581
1136	896.471	2900.89	84.6571			1136	788.74	2584.88	84.88
1137	2266.66	2788.28	164.479			1137	574.57	2962.64	33.36
1138	2191.22	1603.06	129.722			1138	2154.59	831.343	117.614
1139	2141.66	241.744	147.634			1139	795.17	2145.15	51.2453
1140	2216.07	2580.93	121.487			1140	1241.48	2605.31	56.7049
1141	1444	2646.73	41			1141	1428.96	2192.8	27.38
1142	1415.11	2874.89	93			1142	2217.54	362.312	147.375
1143	2045.52	1384.41	120.556			1143	964.756	2492.18	108.911
1144	1522.88	2399.12	86			1144	2468.4	2072.79	68.5059
1145	444.786	2787.46	81.4714			1145	1025.32	2394.44	20.7937
1146	754.803	2835.45	118.493			1146	1489.35	2319.78	41.8824
1147	827.333	2287.08	64			1147	2154.74	1991.77	84.283
1148	2138.43	1129.67	166.507			1148	1077.85	2212.41	26.6164
1149	2342.78	1041.59	125.333			1149	806.514	2570.75	100.458
1150	1534.26	2377.3	35.4754			1150	1054.18	2561.39	84.377
1151	2160.65	2846.11	73			1151	608.512	2266.15	99.439
1152	1493.92	2963.15	22.6667			1152	2311.04	1427.23	81.3333
1153	2054.93	3009.01	91.4493			1153	2369.49	2094.79	22
1154	834.468	2809.44	91.5065			1154	1028.56	2422.56	31.3676
1155	1962.37	2578.42	18.5667			1155	2494.82	3003.72	54.745
1156	2379.5	2444.58	95.5			1156	3089.36	2787.19	120.537
1157	1138.59	2308.56	60.0294			1157	2556.85	402.616	107.547
1158	428.897	2987.71	157.382			1158	781.435	3031.39	50.4706
1159	833.436	2899.56	113			1159	2459.86	2481.58	16.5422
1160	1801.51	2589.41	125.732			1160	2207.94	406.967	111.233
1161	1848.3	2700.6	119.371			1161	1019.27	2461.28	21.4267
1162	1349.77	2702.66	90.6			1162	2681	2955.57	144.855
1163	1731.17	2877.2	36			1163	1007.58	2690.15	47.7736
1164	1122.9	3083.16	123.516			1164	917.704	2597.3	87.4366
1165	2100.44	1956.16	63.6082			1165	1468.24	2849.84	61.32
1166	1544.85	2647.75	87.7736			1166	2106.16	1376.05	76
1167	2539.02	639.979	139			1167	635.59	2183.95	21
1168	1533.95	2446.92	94			1168	2566.32	585.071	123.405
1169	720.737	2913.72	147.539			1169	1572.43	2419.96	25.0816
1170	2171.13	2221.87	95			1170	2433.14	295.164	134.115
1171	2285.33	2175.74	113.461			1171	2028.2	2755.39	53.4875
1172	350.735	2140.71	90.4706			1172	2281.23	2860.49	77.3944
1173	1823.04	2981.64	103.778			1173	2538.12	2585.93	37.0233
1174	462.03	2612.98	40.5606			1174	895.466	2814.63	24.5342
1175	1424.13	3131.93	118.672			1175	941	2124.29	49.2203
1176	1578.92	2648.12	96.2083			1176	537.253	2514.67	35.48
1177	536.357	2964.14	129.414			1177	2279.61	1295.58	84.493
1178	2230.65	2831.76	163.526			1178	3059.72	2896.47	111
1179	1561.13	2641.13	33			1179	551.455	2348.05	38
1180	1462.5	2554.98	91.9773			1180	2936.98	2857.95	122.568
1181	1350.11	2504.76	56			1181	671.829	2169.3	64.4143
1182	1052.77	2883.3	129			1182	3190.23	2877.46	102.377
1183	788	2888	170.605			1183	2317.92	1909.75	68.7736
1184	806.319	2741.35	144.536			1184	770.921	2509.03	85.6825
1185	1952.06	3192.9	105.481			1185	1835.05	2731.84	24.4211
1186	666.436	2928.93	108.655			1186	1702.46	2524.72	49.2281
1187	1916.27	2546.55	82.4194			1187	2128.03	2620.42	94.6333
1188	674.375	3019.74	105.542			1188	1167.5	2721.54	58.4211
1189	1008.59	2866	110			1189	1931.31	2546.67	60
1190	869.041	2690.58	161.575			1190	1316.02	2678.35	35.7719
1191	1634.33	3114.81	77.5469			1191	688.306	2181.35	34.6129
1192	2117.41	2391.98	87.2391			1192	2536.99	2556.24	31.5333
1193	870.333	2821.14	115.386			1193	2505.52	699.531	134.469
1194	1950.07	318.28	143.44			1194	1212.66	2842.18	54.5244
1195	1974.16	2991.42	88.3273			1195	1840.25	2169.94	23.3385
1196	2208.89	2870.63	67.5965			1196	1119.98	2755.14	77.1961
1197	2218.51	2188.41	104.939			1197	2846.03	2739.93	99.4773
1198	1440.32	2693.41	7.21429			1198	1943.51	359.141	137.62
1199	2179.82	383.675	126.468			1199	3094.4	2758.54	109.515
1200	1558	2536.41	84.2037			1200	2078.13	2177.78	62.6296
1201	950.971	2794.52	77.4928			1201	1338.38	2395.53	46.8723
1202	1227.61	2528.12	39.6735			1202	2365.26	2908.82	57.3846
1203	2031.58	1565.98	123.583			1203	2332.34	2880.19	36.5375
1204	2563.23	605.45	131.417			1204	1245.25	2246.35	35.5125
1205	1716	2806.79	53			1205	874.452	2635.15	28.4384
1206	2063.59	2548.33	79.4744			1206	1256.66	2705.57	49.7679
1207	582.776	2419.66	156.448			1207	1042.36	2503.83	41.4675
1208	1245.51	2844.4	50.766			1208	3271.44	2803.43	125.523
1209	2675.43	673.087	116.761			1209	842.237	2631.81	38.7458
1210	1556.2	2687.46	45			1210	1595.14	2946.64	90.4359
1211	1271.2	2692.88	9			1211	479.448	2261.21	19.6724
1212	2028.83	2249.17	63.1707			1212	1464.35	2667.58	63.4937
1213	2476.46	867.042	126.493			1213	1032.12	2417.95	54.5591
1214	2259.33	2499.08	85			1214	2379.38	2742.64	45
1215	973.881	2617.05	126.644			1215	2108.06	486.817	139.43
1216	1160.67	2300.75	63.3462			1216	488.31	2136.02	32.9286
1217	824.214	2657.8	80.2857			1217	2934.96	2879.79	129.14
1218	1435.78	2788.72	110.463			1218	450.653	2184.33	43
1219	1564.63	2634.27	136.521			1219	2166.33	1923.47	56.25
1220	1918.54	2252.73	81.5522			1220	813.354	3010.77	88.4051
1221	1042.01	2416.95	98.4795			1221	586.456	2802.05	19.481
1222	2525.98	741.82	119.2			1222	1789.66	2506.86	24.6308
1223	605.107	2260.01	179.493			1223	2638.93	472.987	97.5132
1224	649.061	2612.2	50.2041			1224	2323.65	2180.68	32.4941
1225	1724.74	2521.71	110			1225	2587.93	3029.21	141.483
1226	1808.87	2969	130.526			1226	2082.95	346.265	99.1446
1227	2191.45	2248.72	106.128			1227	2434.33	2061.5	71.1852
1228	404.125	2710.05	33.15			1228	2246.96	2162.14	21.8163
1229	1490.93	2950.36	96.5526			1229	963.232	2510.93	62.4203
1230	1837.57	2639.51	91.5873			1230	757.341	2409.18	22
1231	2144.06	2256.43	76			1231	2186.57	696.468	133.442
1232	732.452	2229	134.629			1232	2570.46	2673.09	62.443
1233	1096.68	2525.4	101.444			1233	1191.56	2343.76	63.3333
1234	1505.44	3107.53	33.7442			1234	490.277	2470.29	19.5783
1235	520.977	2516.36	59.2273			1235	2173.92	1849.35	73.4865
1236	918.492	2432.25	73.5538			1236	2165.75	1286.38	89.6901
1237	2244.72	2430.84	106.463			1237	2515.19	2323.64	14.5065
1238	2184.14	3074.92	145.569			1238	1954.86	2160.66	49.4521
1239	592.267	2176.97	168.5			1239	2388.44	2237.32	107.615
1240	1563.35	2366.29	54.5152			1240	2302.77	1519.9	78.55
1241	246.291	2899.8	56.6727			1241	2080.88	1498.76	90.4412
1242	595.158	2450.05	56			1242	3086.42	2656.76	102.091
1243	1161.79	2234.53	71.7209			1243	1584.81	2756.36	38.6094
1244	400.58	2573.41	50.4203			1244	626.169	2798.06	79.5493
1245	1446.05	3032.67	55.7143			1245	701.638	2693.87	13.9149
1246	1383.67	2373.42	45			1246	2130.02	2281.61	105.652
1247	1161.39	2320.37	97.2195			1247	975.058	2240.71	100.212
1248	410.523	2825.09	136.446			1248	2277.46	2137	57.8
1249	2215.77	2823.89	148.557			1249	2512.62	566.173	126.582
1250	1234.63	2689.68	91.4912			1250	1767.46	2823.56	62.5062
1251	332.841	2773.59	93.9773			1251	2507.1	2402.27	33
1252	2164.76	421.759	125.111			1252	2237.43	1139.21	118.333
1253	1565.29	2322.62	74			1253	2608.6	584.944	119.361
1254	1718.82	2696.05	56.6129			1254	2214.94	333.417	136.631
1255	387.08	2430.08	95.66			1255	826.193	2213.39	77.6667
1256	1420.16	2575.5	97.4286			1256	3067.16	2836.18	88.3151
1257	1696.84	3156.35	95.6146			1257	1131.79	2541.28	65.375
1258	651.139	2111.61	91			1258	1584.87	2632.76	32.4634
1259	2454.93	2930.57	133.567			1259	758.536	2458.73	12.2857
1260	1494.91	2688.42	25.4531			1260	2152.49	1702.18	76.5789
1261	2641.65	776.091	121.655			1261	1124.71	2541.89	58.4444
1262	730.15	3044.26	160.537			1262	629.797	2277.36	28.527
1263	2042.18	2107.9	136.639			1263	2226.49	1708.61	115.237
1264	2096.14	2349.24	119.397			1264	891.089	2489.77	108.532
1265	1996.1	2285.56	14.5			1265	2679.08	2636.97	54.7458
1266	2018.25	1764.6	112.431			1266	2129.79	344.357	148.229
1267	1816.13	2500	84			1267	1081.63	2514.37	43.9184
1268	521.25	3120.23	147.512			1268	2556.17	470.886	106
1269	836.902	2337.27	113			1269	2341.56	2122.05	42
1270	1488.15	2614.05	86			1270	1505.33	2501.57	42.5143
1271	1986.18	1560.87	126.393			1271	2126.24	2313.83	33.6092
1272	1277.85	2733.94	40.5556			1272	2917.26	2764.8	150.354
1273	2080.91	1931.74	104.029			1273	3226.82	2720.33	82.2449
1274	659.073	2462.39	48			1274	686.394	2223.28	80.6197
1275	1879.31	2895.95	97.5938			1275	741.891	2722.91	61.2656
1276	625.286	2847.6	130.557			1276	1371.93	2255.3	23.4324
1277	1373.69	2986.89	87			1277	2325	1948.23	73.5068
1278	2367.26	2486.53	110.597			1278	2068.19	2307.96	73.8491
1279	2295.05	2845.16	146.623			1279	584.698	2381.48	22.3492
1280	2643.43	2936.23	196.569			1280	1838.83	2320.46	38.7778
1281	1144.02	2736.39	51.4754			1281	1593.87	2459.29	33.5714
1282	2235.67	1603.95	107.368			1282	970.798	2860.38	42.3936
1283	2283.2	2934.96	145.525			1283	2194.86	2201.46	6.41892
1284	2471.89	551.513	124.434			1284	1125.89	2555.54	83.6615
1285	748.408	2621.52	158.38			1285	1195.84	2279.46	21
1286	878.278	2719.72	92.1481			1286	3180.89	2566.9	82.5185
1287	2184.79	2375.7	115.357			1287	1192.78	2218.7	42
1288	657.608	2449.08	81.2353			1288	2063.81	416.453	108.535
1289	2638.01	2870.74	151.466			1289	3001.86	2610.85	81.4872
1290	2510.32	2981.36	151.568			1290	3101.22	2688.01	84.5132
1291	1966.41	3029.84	96.5714			1291	798.055	2468.62	22.5616
1292	2770.8	3011.11	131.526			1292	1188.55	2683.04	78.7736
1293	2542.01	769.833	152.427			1293	935.765	2584.35	46.5062
1294	750.092	2768.08	87.4462			1294	2549.59	591.406	102.219
1295	2224.58	2779.82	74.4615			1295	544.685	2212.2	25.7407
1296	1491.84	2753.6	129.638			1296	2366.43	2855.32	84.3824
1297	2251.87	1755.05	113.345			1297	722.177	2404.76	25.3065
1298	895.07	2267.23	75.1395			1298	676.684	2874.33	24.4868
1299	1388.14	3093.61	64			1299	2280.19	2752.19	24.8333
1300	1077.85	2290.24	81.1957			1300	2308.65	2081.97	76.4242
1301	2438.88	654.835	176.527			1301	761.197	2379.3	98.3485
1302	528.837	2480.56	92			1302	2357.58	2290.27	13.7885
1303	1461.03	2498.37	107.587			1303	2403.01	1601.86	99.4143
1304	2075.24	2495.34	54.78			1304	2345.48	750.2	137.692
1305	2125.04	1417.46	147.397			1305	2225	2289.72	67.4211
1306	1366.43	2900.77	73			1306	1791.37	2659.51	52.4217
1307	1467.61	2783.66	32.4516			1307	895.892	2452.22	46.6615
1308	1485.25	3150.37	73.3725			1308	1152.63	2276.86	35.6939
1309	406.87	2854.71	90.5652			1309	2044.79	1508.29	91.3636
1310	564.561	2563.12	131.488			1310	1750.18	2504.77	100.571
1311	535.682	2759.97	123.545			1311	2555.44	852.107	117.512
1312	1818.24	2866.43	94.4603			1312	1401.87	2426.39	53.5263
1313	1865.56	2924.33	97.5614			1313	643.899	2705.47	32.427
1314	362.877	2337.82	42.4769			1314	2137.78	1634.22	65
1315	1551.62	2554.04	122.542			1315	2845.09	2889.57	133.935
1316	1613.89	2792.19	12			1316	1099.38	2590.12	22
1317	2015.38	1501.18	117.267			1317	583.141	2371.97	64.5128
1318	1209.07	2836.31	75.5763			1318	1353.09	2481.5	98.4605
1319	2541.56	785.833	140.486			1319	3182.71	2565.56	91.7424
1320	1413.57	3012.05	39			1320	2409.07	2304.98	59.9535
1321	2271.63	2053.85	104.278			1321	2718.92	2593.39	78.5943
1322	397.865	2617.95	62			1322	3219.44	2750.69	100.389
1323	2276.51	2061.39	102.569			1323	1116.28	2714.88	67.5867
1324	1588.05	2557.43	116			1324	1331.27	2585.8	57.4143
1325	2250.08	1623.7	141.094			1325	1975.43	2475.07	62.1964
1326	420.5	2337.47	47.5606			1326	531.154	2490.49	57.5231
1327	760.475	2492.75	98.4068			1327	2187.85	1015.54	122.721
1328	1560.24	3092.29	95.6271			1328	2046.65	1332.52	100.957
1329	371.98	2518.04	37.2245			1329	655.041	2698.14	33.6735
1330	854.737	2556.08	106			1330	2377.29	2190.15	66.1525
1331	881.656	2285.62	63			1331	1179.33	2510.67	56.2407
1332	2560.43	352.772	136.484			1332	1684.29	2181.42	31.3231
1333	2157.05	1366.09	118.547			1333	2496.14	2727.59	50.5781
1334	2243.29	1272.32	167.645			1334	773.067	2764.61	52.3733
1335	548.573	2217.52	179.524			1335	2119.84	1917.5	81.45
1336	2491.61	877.047	161.641			1336	2191.12	2175.75	90.678
1337	1041.19	2590.65	164.093			1337	2116.93	1400.47	86
1338	757.707	2211.16	80.4483			1338	2264.92	1911.15	60.4697
1339	1981	2712.15	68			1339	2189.15	1563.4	76.7736
1340	2120.29	2478.58	118.8			1340	2459.68	1019.37	93.4872
1341	1654.16	2930.23	35.5323			1341	971.921	2220.36	97.3553
1342	1367.27	2609.52	88.5758			1342	458.268	2752.55	19.4634
1343	2121.61	2154.04	158.321			1343	692.286	2144.5	111.268
1344	2102.81	1929.54	156.478			1344	768.481	3238.74	88.6104
1345	1384.3	2942.3	81.3962			1345	2162.22	1630.64	66.4875
1346	1519.22	2542.93	127.672			1346	1790	2389.48	68.3548
1347	2080.98	2413.77	110.574			1347	810.474	2766.61	12.3421
1348	584.368	2384.98	101.614			1348	3083.23	2503.5	68.4872
1349	2032.95	2607.2	35			1349	2344.85	1952.02	74.7222
1350	1401.91	2739.46	67			1350	2967.63	2818.09	128.558
1351	2496.34	3060.52	152.563			1351	1967.95	2583.55	39
1352	980.103	2669.8	155.506			1352	815.418	2513.47	41.519
1353	1520.03	2801.76	15			1353	2108.45	2485.78	82.4459
1354	980.406	2612.59	170.478			1354	2365.96	2242.42	24.5119
1355	2195.98	2033.69	115.111			1355	2089.75	1965.47	99.5
1356	2443.23	882.806	145.597			1356	2157.83	1092.01	114.348
1357	1742.76	2873.62	19			1357	2401.75	2168.07	58.403
1358	578.372	2618.28	160.526			1358	2204.7	1204.98	90.6842
1359	1569.57	2353.19	51.4074			1359	1029.62	2271.75	60.4342
1360	438.636	2857.52	46.4935			1360	1971.53	2534.18	31.5658
1361	693.2	2536.65	153.585			1361	2447.38	268.098	133.457
1362	412.075	3008.05	79			1362	2494.03	2789.91	91.6462
1363	2114.94	2060.1	103.306			1363	2188.89	2709.9	66.486
1364	1487.67	2645.64	36			1364	966.507	2431.32	100.362
1365	841.672	2736.77	88.3607			1365	474.609	2692.17	23.8696
1366	1658.92	2531.54	30			1366	2534	727.79	111.113
1367	582.847	2892.29	158.528			1367	2043.55	2472.73	19.2545
1368	2220.37	2101.11	77.5645			1368	2131.09	864.831	134.351
1369	1493.34	3059.3	31.5909			1369	2186.25	401.947	139.484
1370	1171.49	2475.3	94.4783			1370	2516.34	2679.26	50.4737
1371	2201.1	1491.98	156			1371	2279.79	1377.41	95.4133
1372	2057.29	462.409	112.409			1372	3013.33	2643.67	102.333
1373	2022.69	1743.83	99.3966			1373	2539.37	2103.83	62.3077
1374	2035.76	1916.9	160.644			1374	2694.28	523.528	98.6389
1375	2554.1	650.411	135.493			1375	2414.57	2351.08	53.1429
1376	2063.02	1596.34	102			1376	1353.24	2503.92	63.1837
1377	1736.46	2664.48	104.667			1377	2381.94	2129.97	80.3433
1378	2131.26	1046.88	152.494			1378	2733.98	458.967	112.3
1379	2521.67	600.681	154.406			1379	2284.2	752.783	137.42
1380	1846.18	2444.92	56			1380	1084.38	2287.55	58.4405
1381	2314.38	2329.5	88.26			1381	822.083	3108.36	50.5238
1382	1980.89	244.471	169.586			1382	1036.05	2873.08	52.7385
1383	618.121	2729.98	118.086			1383	836.538	2734.31	49.7308
1384	2068.52	2202.12	90.4658			1384	2429.38	2971.61	59.4937
1385	2188.11	2600.18	52.6462			1385	2157.03	1958.8	77.4928
1386	373.974	2323.76	84			1386	622.465	2380.85	46.6197
1387	1472.71	2327.56	86.8049			1387	2270.02	2386.91	77.5172
1388	1507.82	2732.06	116.549			1388	540.162	2498.21	48.4706
1389	1990.9	2220.23	135.566			1389	2141.68	329.107	149.547
1390	1765.74	2773.42	101.435			1390	1058.99	2487.63	22.4507
1391	1094.62	2580.52	49.4493			1391	1271.67	2447.78	50.3
1392	873.557	2606.57	98.5286			1392	2329.64	1624.09	97.6714
1393	2003.75	442.254	135.408			1393	2291.64	2651	100.213
1394	942.184	2585.76	62.5517			1394	1874.55	2124.1	28
1395	1900.94	2573.06	104.507			1395	2055.92	1390.63	76.7451
1396	430.439	2280.81	73.614			1396	1918.43	2527.74	75.5844
1397	1568.25	2704.04	120.642			1397	1172.36	2612.85	26.9455
1398	1599.23	3059.01	44.5352			1398	2270.08	1444.51	117.302
1399	1739.39	3065.72	128.022			1399	2447.46	300.283	109.685
1400	969.481	2762.28	85.3889			1400	2751.8	2922.54	109.739
1401	778.848	2970.75	161.443			1401	571.321	2318.02	46.125
1402	1392.63	2428.66	82.7895			1402	2417.9	313.5	114.867
1403	2240.53	2161.08	135.774			1403	2335.87	2679.48	87.3548
1404	448.684	2552.04	104.386			1404	912.771	2135.2	107.47
1405	1667.2	2874.26	31			1405	1856.12	378.966	112.43
1406	1566.89	3080.27	42			1406	2410.07	2288.68	48.15
1407	330.148	2553.85	62.6066			1407	2245.04	341.205	112.446
1408	1613.8	2614.07	101.5			1408	954.176	2292.53	110.446
1409	1731.41	2280.21	13.3276			1409	2250.16	1424.9	83.6129
1410	2282.53	2849.2	74.5946			1410	3030.35	2979.87	125.5
1411	2006.37	2487.65	55.6			1411	2360.62	1834.79	88.5714
1412	2547.78	2673.97	169.5			1412	1219.61	2508.47	35.5405
1413	478.4	2605.52	127.547			1413	2598.41	2574.96	67.5571
1414	2369.56	821.47	172.636			1414	2429.93	2373.77	68.4507
1415	619.361	2173.39	114.475			1415	2687.05	521.148	120.77
1416	1617.87	3167.01	51.4416			1416	1790.66	2217.24	33
1417	494.794	2400.26	51			1417	1766.58	2516.3	62.6061
1418	2352.19	1393.6	155.571			1418	1182.34	2658.89	64.5915
1419	1001.06	2711.43	149.571			1419	2044.76	1354.12	86.3137
1420	1957.34	2329.2	90.1591			1420	1982.47	2505.2	96.4632
1421	1274	2771.5	132			1421	618.278	2702.44	84.5972
1422	2340.48	2408	104.25			1422	533.551	2409.58	29.3913
1423	1335.15	2973.2	67.4324			1423	2988.57	2513.89	106.539
1424	684.227	2525.44	147.515			1424	2041.87	343.912	99.6029
1425	704.682	2118.82	114.545			1425	2102.07	1294.05	79
1426	1520.5	2758.01	72.4861			1426	2604.85	458.307	97.56
1427	2108.45	1445.72	104.359			1427	1647.32	2324.21	24.4878
1428	1494.39	2906.34	59.3409			1428	2251.99	2223.88	85.473
1429	2597.16	2676.98	130.737			1429	1414.16	2517.35	78.7544
1430	2166	585.5	161.5			1430	2413.6	2221.28	60.4667
1431	2152.88	2098.76	67			1431	3044.12	2518.9	110.402
1432	593.373	2151.43	73.2745			1432	3310.38	2716.5	93.4342
1433	298.679	3211.9	131.481			1433	686.31	2715.73	30.6056
1434	1749.95	2801.02	90.7			1434	1772.28	2289.97	53.6176
1435	2722.26	2797.17	137.5			1435	1844.54	2456.76	35.3714
1436	2355.28	1340.68	140.2			1436	3206.75	2751.45	91.6301
1437	2245.6	1320.92	134.229			1437	1151.19	2889.39	57.5625
1438	196.38	2676.39	58.5493			1438	1883.82	2183	22.2167
1439	2208.8	1937.88	87			1439	622.189	2597.85	2.55405
1440	2045.97	2302.38	148.577			1440	1105.89	2182.38	48.7547
1441	2228.87	2371.08	108			1441	2187.65	2243	75.5476
1442	615.75	2785.08	127.288			1442	2938.74	2530.19	120.554
1443	1886.54	2649.83	101.951			1443	3109.48	2596.84	89.1136
1444	1739.03	2648.35	130.508			1444	1114.36	2211.4	26
1445	1166.74	2802.07	136.514			1445	1309.07	2449.63	55.7368
1446	2192	2413.24	149.621			1446	638	2894.39	33.4253
1447	2580.16	3053.06	168.506			1447	831.165	2904.57	29.4937
1448	1435.74	2603.56	133			1448	2510.49	358.206	112.603
1449	1948.03	1444.19	136.543			1449	2352.71	1894.26	44.4667
1450	1103.29	2487.5	44			1450	2420.05	724.266	109.443
1451	1995.26	2539.84	30			1451	1153.16	2420.35	38.3784
1452	2084.97	2167.12	106.633			1452	2139.82	1741.68	77.3214
1453	2132.07	1970.69	90.6557			1453	2429.32	2696.27	111.427
1454	1970.11	2883.17	97.6094			1454	2519.02	257.333	122.667
1455	616.936	2787.15	59.1489			1455	1888.11	2831.54	53.4143
1456	631.344	2632.38	163.393			1456	2640.18	469.033	122.7
1457	1842.94	2584.72	103.611			1457	891.576	2240.76	89.3559
1458	2123.25	2963.87	96.4853			1458	596.571	2632.89	43.6984
1459	1286.56	2915.78	107.648			1459	1747.49	2584.35	44.5493
1460	846.358	2273.09	108.377			1460	2111.16	2408.49	71.5467
1461	2243	1056.34	124			1461	2285.5	492.49	93.3646
1462	361.746	2951.89	79.6032			1462	1805.44	2365.49	81.5057
1463	1602.68	2758.03	94.973			1463	2492.21	2251.37	91.2903
1464	547.22	3001.78	163.695			1464	662.121	2395.33	14.303
1465	1709.5	2463.86	27			1465	1533.46	2638.87	44.6176
1466	1150.93	2459.4	52.2381			1466	2043.42	2257.88	49.4875
1467	2151.2	2457.12	86			1467	3187.52	2786.59	91.3889
1468	2255.29	2854.09	129.328			1468	594.729	2723.84	20.6143
1469	1494.03	2375.08	77			1469	902.985	2191.94	46.3182
1470	2051.57	420.824	154.647			1470	1968.56	2123.98	41
1471	800.432	2658.57	82			1471	1894.18	2616.53	11.5479
1472	1771.91	2425.72	113.557			1472	691.12	2412.23	110.542
1473	2040.58	2321.08	67.2			1473	1160.93	3009.26	11.5842
1474	584.955	2509.5	139			1474	2324.15	414.745	128.49
1475	1472.56	2725.98	70.3125			1475	2102.65	2187.13	77.4259
1476	1511	2839.56	75.2885			1476	2341.29	1685.67	69.4533
1477	1282	2909.09	122			1477	2437.77	2560.21	21.4943
1478	2152.93	2865.66	44.5593			1478	1997.29	2201.27	74.7308
1479	2479.51	2989	146.507			1479	2047.31	539.33	124.515
1480	398.111	2285.5	79			1480	1689.12	2330.12	19
1481	1545.1	2798.67	65.6154			1481	2029.07	350.203	117.459
1482	2023.27	2435.89	50			1482	2469.68	2971.66	50.6846
1483	1365.75	2300.82	55.5574			1483	1187.64	2886.7	105.438
1484	862.689	2188.33	88.3934			1484	979.143	2227.05	40.6429
1485	978.143	2746.79	127.393			1485	1040.44	2062	42.3973
1486	1351.76	2817.97	11			1486	636.646	2656.48	59.5692
1487	1248.56	2985.68	32			1487	582.151	2502.3	60.4247
1488	2436.54	3064.76	169.528			1488	896.696	2074.04	41.8261
1489	2397.92	463.652	144.606			1489	2273.89	1884.51	78.5205
1490	412.735	2601.35	122			1490	1448.19	2690.59	39.45
1491	312.732	2987.7	80.2143			1491	2188.85	1467.57	72.283
1492	2186.71	1276.32	163.528			1492	2005.9	2550.68	67.4265
1493	718.17	2296.11	187.189			1493	762.909	2651.17	51.5758
1494	1329.89	2584.21	94			1494	2312.33	2086.72	43
1495	1160.96	2391.2	38.3036			1495	824.214	2546.14	77.8036
1496	586.05	2746.2	50.5667			1496	1990.68	2830.49	89.4828
1497	1486.78	2397.17	90.678			1497	2358.31	425.586	119.657
1498	1921.29	2927.8	75.0244			1498	2488.36	2287.32	55
1499	2026.08	1317.98	118.16			1499	894.733	3019.19	35.6047
1500	2484.83	936.97	138.485			1500	786.284	2629.49	40.5821
1501	1459.57	2837.23	75			1501	645.488	2538.3	38.4524
1502	959.123	2439.66	101.538			1502	3185.57	2693.57	86.4861
1503	2637.33	689.447	136.461			1503	1939.63	356.942	131.372
1504	914	2836	157.565			1504	2256.83	1915.52	63.5733
1505	2536.1	846.343	136.557			1505	2522.53	570.041	127.384
1506	2095.77	731.814	166			1506	724.846	2418.43	69.2923
1507	726.772	2477.82	162.519			1507	2321.59	2030.9	39.4286
1508	1403.3	2875.18	100.679			1508	1072.93	2387.22	106.432
1509	720.521	2591.27	110.493			1509	2909.4	2533.9	135.653
1510	1628.39	2597.14	49			1510	906.22	2508.42	44.2881
1511	2039.23	2462.38	62.5342			1511	1671.89	2728.06	42
1512	2322.76	2579.48	117.435			1512	2294.84	2920.14	40.7755
1513	863.362	2793.19	139.304			1513	739.804	2164.04	55.2143
1514	1455.63	2402.23	81			1514	1256.21	2349.22	38.7302
1515	1466.85	2623.59	0.205128			1515	711.303	2551	20.5658
1516	2250.21	2668.2	100.526			1516	2558.77	2518.92	55.7308
1517	1476.89	2878.38	121.385			1517	2007.36	2531.25	43
1518	1885.01	2759.11	108.527			1518	2066.98	1493.08	83.2745
1519	710.45	2514.97	107.633			1519	1798.38	2459.36	14.0667
1520	2241.08	1864.77	102.361			1520	897.909	2057.38	41.5844
1521	2060.07	2989.07	110.575			1521	998.227	2022.36	52.7121
1522	666.395	2389.97	78			1522	1271.78	2244.62	47
1523	2146.53	390.714	169.457			1523	1000.03	2305.32	33.371
1524	322.893	2536.63	91.3214			1524	1366.38	2726.71	114.539
1525	628.806	2137.06	94			1525	1985.96	2498.51	14.6286
1526	714.8	2675.56	134			1526	2635.82	700.19	114.44
1527	1712.11	2636.75	124.321			1527	1001.27	2415.68	89.3387
1528	1789.53	2615.02	103.638			1528	694.725	2161.85	23
1529	1568.02	2839.76	40.3818			1529	2133.48	1174.02	88
1530	622.5	2865.98	150.845			1530	2572.92	2455.62	89.5909
1531	1278.07	2644.19	116			1531	2488.78	1088.33	100.667
1532	810.175	2039.4	104.556			1532	2175.39	2578.32	79.6774
1533	846.567	2481.18	63.4333			1533	1049.12	2464.84	62.439
1534	2233.75	2253.38	87.3774			1534	842.319	2226.78	65.5652
1535	2211.06	2947.29	114.587			1535	2411.13	2070.01	69.5493
1536	2096.54	652.46	127.619			1536	2613.42	2489.72	44.5769
1537	1147.17	3001.93	138.683			1537	2937.52	2512.52	104.458
1538	2388.98	2503.03	97.65			1538	1132.71	2213.45	67.25
1539	558.111	2217.46	61.7407			1539	2404.55	1547.71	114
1540	1052.13	2551.87	91			1540	2249.21	776.274	143.507
1541	1855	2481.87	80.3774			1541	773.047	2462.21	120.588
1542	1897.32	2637.04	64.48			1542	451.174	2238.43	35.3623
1543	2100.05	2736.34	77.2045			1543	423.691	2209.09	35.5185
1544	1574.09	2688.88	57			1544	1040.27	2263.14	102.196
1545	1975.11	2185.59	63.6786			1545	2274.63	388.31	95.5915
1546	2229.9	1545.6	114.577			1546	450.095	2500.52	18.619
1547	1060.88	2363.76	111			1547	682.214	2530.11	39.6857
1548	2016.93	365.541	156.405			1548	722.111	2668.37	17.2407
1549	2326.84	1171.57	134.341			1549	2060	1411.37	96.5753
1550	2013.31	2302.81	23			1550	2378.83	2271.79	71.5488
1551	752.578	2396.95	87.4375			1551	576.404	2409.6	8.86538
1552	419.393	2190.57	163.214			1552	2425.38	437	110.412
1553	1685.87	2997.77	107.731			1553	1770.37	2361.48	15.3288
1554	1350.28	2588.49	108.233			1554	2349.88	1380.38	123.423
1555	2120.31	2245.13	64.629			1555	1863.79	2782.85	62.4444
1556	901.186	2187.22	113.424			1556	2464.95	2222.08	38
1557	1560.89	2264.79	18			1557	1650.8	2827.33	99.6267
1558	1416.23	3100.98	94.6308			1558	1833.79	2694.42	60.5526
1559	2323.06	2419.54	78.7917			1559	2307.04	1430.82	95.5658
1560	2154.47	707.389	154.467			1560	819.952	2688.17	39
1561	870.079	2344.95	59			1561	660.095	2530.69	29.5676
1562	2173.46	1139.86	130.4			1562	1835.07	2411.26	78.907
1563	2622.67	2650.02	141.524			1563	2641.55	457.88	111.08
1564	1877.48	2886.16	120.627			1564	790.917	2256.08	18.2
1565	312.789	2826.72	86.4507			1565	2356.65	717.733	118.488
1566	2244.98	878.659	152.571			1566	3249.8	2538.61	105.241
1567	519.763	2698.76	51			1567	451.611	2670.52	25.7963
1568	1348.78	2871.89	20.8919			1568	939.388	2679.54	73.5125
1569	2266.54	562.586	132.543			1569	2389.05	818.863	145.521
1570	772.787	2679.96	67.1915			1570	2575.86	2914.83	50.4935
1571	1605.24	2687.43	116.776			1571	447.403	2153.27	25.6129
1572	1322.08	2744.95	21			1572	2441.81	870.333	109.667
1573	2166.94	1813.18	91.4675			1573	3103.04	2806.99	102.5
1574	2247.69	1889.67	117			1574	2345.44	2469.83	41.4643
1575	1285.46	2783.32	92.5614			1575	1466.46	2866.96	82.3472
1576	1411.2	3019.49	81.4783			1576	2320.81	2391.39	27.7778
1577	2082.86	2326.61	98			1577	822	3016.05	86.6986
1578	2034.23	2429.36	86.5652			1578	2033.57	2354.67	59
1579	718.915	3229.34	146.322			1579	922.425	2453.88	69.6027
1580	920.289	2581.04	66.7778			1580	2164.9	2266.56	9
1581	2597.89	810.889	127.619			1581	1700.45	2257.6	23.6604
1582	1138.39	2324.99	73.6056			1582	1621.74	2471.28	38
1583	1386.85	2364.85	80			1583	841.604	2463.7	80.7736
1584	781.2	2557.46	85			1584	2957.42	2925.86	116.646
1585	2247.56	477.857	146.494			1585	2422.74	1165.42	122.45
1586	1043.16	2604.4	82.3824			1586	1349.51	2707.71	84.5067
1587	798.914	2627.46	62			1587	1959.97	2546.05	17.3692
1588	2055.4	2401.12	95			1588	1122.1	2629.05	66.4146
1589	2408.14	431.492	157.646			1589	2667.22	351.025	114.062
1590	1492.42	2449.42	54.2444			1590	651.333	2192.25	52.6667
1591	1640.76	2729.55	45			1591	2114.84	377.61	135.442
1592	815.256	2446.62	173.449			1592	1237.99	2922.62	88.525
1593	2213.02	1792.6	131.298			1593	1482.06	2211.95	26.6825
1594	1444.86	2890.61	85			1594	2957.76	2554.87	120.635
1595	2008.33	2340.64	137.463			1595	431.857	2447.66	30.1607
1596	1441.32	2425.48	26.4			1596	593.759	2581.48	12.2222
1597	2309.46	2625.95	161.474			1597	2077.58	284.179	113.474
1598	2065.9	1274.77	127.167			1598	2311.17	397.048	92.6071
1599	1601.56	2545.64	109			1599	2212.7	2247.79	48.493
1600	298.63	2417.58	39.5185			1600	2451.56	327.043	137.344
1601	1838.24	3187.53	101.255			1601	2109.86	942.936	103.628
1602	2681.91	2976.68	135.506			1602	2477.83	2925.03	76.5132
1603	1956.1	2294.97	82			1603	2185.03	1303.94	103.391
1604	2021.15	552.091	116.636			1604	2554.3	711.049	117.393
1605	2737.12	620.263	124.123			1605	2547.94	2595.57	35.9388
1606	2408.25	2613.18	141.493			1606	3079.26	2669.93	122.537
1607	1520.95	3019.05	77.5303			1607	2260.53	2269.07	48
1608	1449.23	2413.42	91.5645			1608	2346.38	1894.08	73
1609	2523.96	737.662	127.485			1609	451.373	2506.85	18.6949
1610	2488.24	604.028	151.549			1610	1098.24	2534.54	53
1611	1677.61	2865.04	88			1611	1165.03	2266.77	46.3714
1612	1814.06	3180.94	93			1612	2276.75	2621.25	68.2545
1613	1502.52	2704.11	125.507			1613	1835.65	2539.02	104.573
1614	2577.63	719.851	157.597			1614	2314.4	2863.27	65.4615
1615	1592.08	2820.8	85			1615	1157.48	2513.69	41.7705
1616	1625.41	3261.38	72.2614			1616	2480.58	818.961	99.5325
1617	2075.64	2598.84	143.655			1617	2197.63	2175.19	76.5545
1618	2221.59	1019.68	166.902			1618	2761.45	2964.61	141.771
1619	1950.95	2799.21	117.493			1619	2434.47	2376.19	106.506
1620	2141.27	2009.27	79.7059			1620	2207.42	1501.53	61.7818
1621	1662.83	2881.08	104.485			1621	1136.49	2647.94	66.4286
1622	2266.41	2918.33	206.58			1622	3038.89	2783.26	73.3115
1623	1065.4	2711.92	75.3962			1623	2626.38	592.769	105.554
1624	2485.3	1012.62	136.264			1624	2124.55	1618.49	75.1915
1625	637.4	2316	103.618			1625	526.243	2123.82	21.3378
1626	2264.29	2501.43	96.5882			1626	391.828	2715.55	34.0625
1627	895.195	2483.73	97.1463			1627	2440.39	2202.57	37.8409
1628	983	2422	117			1628	3068.87	2605.98	79.6167
1629	637.632	2471.63	47.5294			1629	3118.68	2633.74	114.613
1630	1317.38	3085.38	45.4648			1630	2461.19	772.84	122.469
1631	995.481	2306.92	137.557			1631	2183.81	1552.94	108.468
1632	2018.07	2316.19	51			1632	1495.51	2389.26	54.411
1633	2260.67	385.027	166.787			1633	2432.43	2142.95	58.746
1634	1761.59	2897.39	100			1634	1725	2593.66	44.6056
1635	1636.06	2691.42	108.38			1635	2426.42	889.934	135.447
1636	1963.56	2594.33	119.455			1636	2240.46	1798.56	70.6852
1637	698.5	2315.61	66.1111			1637	1565	2797.62	52.4684
1638	730.462	2441.72	116.462			1638	734.893	2576.86	24.8214
1639	1372.88	2445.06	76			1639	2403.61	2847.4	65.6613
1640	608.054	2347.57	79			1640	876.805	2847.12	22.4156
1641	1839.95	2898.54	95.4426			1641	2412.91	2331.69	76.7015
1642	2675.18	2954.35	168.514			1642	1007.08	2708.57	104.494
1643	2243.35	952.471	169.559			1643	1046.19	2220.57	32
1644	1755.79	2724.13	138.59			1644	1267.69	2265.54	47.3077
1645	1961.28	2651.99	108.48			1645	2479.45	394.662	138.479
1646	2083.28	2552.48	93.6			1646	1479.97	2551.92	74.3906
1647	674.5	2300.28	64.3696			1647	2334	1777.64	74.8636
1648	1746.11	2576.89	103			1648	652.411	2825.22	26.6027
1649	2015.85	756.852	147.557			1649	1208.39	2515.1	100.339
1650	1465.18	2488.92	79			1650	477.851	2194.68	41.1702
1651	2255.95	356.974	133.566			1651	2342.6	2378.75	26
1652	1786.49	3136.72	101			1652	2006.54	2612.78	51.3889
1653	1606.85	3008.18	34			1653	1482.08	2306.3	61.2623
1654	1711.76	2564.05	101.452			1654	2190.84	1916.98	52.8889
1655	2444.5	1026	139			1655	2445.96	1999.16	65.5217
1656	615.234	2767.5	61.4844			1656	2389.76	2368.42	79.4941
1657	735.935	3144.9	172.441			1657	1899.14	2856.75	26
1658	1625.1	2471.1	51.1875			1658	2166.03	1267.33	82
1659	2136.18	2941.5	93.7727			1659	2660.77	645.887	110.679
1660	1820.51	2256.91	16			1660	457.233	2422.01	23.2907
1661	1375.61	2842.86	80			1661	2644.53	2697.42	42
1662	1162.72	2749.2	116.362			1662	2035.89	504.17	120.5
1663	883.608	3018.59	151.519			1663	2425.43	889.357	98.5238
1664	1589.83	2797	70.2292			1664	2242.5	2377.57	14
1665	848.7	2223.47	113.417			1665	739.828	2160.22	100.672
1666	763.519	2416.95	154.506			1666	2311.59	2081.75	62.48
1667	1852.74	2970.86	35.6842			1667	2361.38	2361.11	54.3385
1668	1524.84	2891.22	97.0816			1668	1133.42	2478.16	81.6613
1669	2113.74	2534.59	54.2951			1669	2542.98	823.966	139.293
1670	846.838	2665.47	96.4853			1670	1962.26	2253.97	43.2586
1671	388.057	2199.57	68			1671	2171.92	2257.92	53.4684
1672	1134.54	2569.91	62			1672	2155.16	476.078	112.468
1673	351.314	2674.22	50.2941			1673	738.767	2724.67	99.589
1674	2118.18	2550.39	39.4211			1674	2704.17	3030.36	140.641
1675	1332.72	2506.55	89			1675	1811.93	2759.36	52.6232
1676	2122.3	2490.7	82.4776			1676	2369.27	2214.55	71.5909
1677	2550.16	715.632	143.485			1677	2198.47	2236.41	77.4118
1678	2672.34	3072.42	131.562			1678	2082.46	2335.98	88.3729
1679	2120.49	2300.25	133.596			1679	2525.49	2308.55	14.5211
1680	1559.53	2805.47	62			1680	750.135	2317.49	52.4324
1681	1163.94	2529.66	78			1681	2598.84	659.702	125.649
1682	873.716	2635.15	134.568			1682	2276.75	1728.81	70.3731
1683	631.041	2938.85	123.486			1683	1947.01	400.354	111.57
1684	2190.2	2429.46	97.5072			1684	3093.41	2698.59	90.6324
1685	1300.44	2643.24	38.9512			1685	2222.93	1656.07	120.759
1686	632.418	2401.55	113.309			1686	573.956	2317.54	10.5882
1687	1061.57	2360.23	77			1687	2142.24	2357.9	11.098
1688	2137.89	1863.83	103.476			1688	1409.12	2460.12	50
1689	2160.85	1733.73	157.507			1689	2204.35	1377.91	121.528
1690	2709.12	633.373	125.418			1690	2958.91	2854.99	111.571
1691	1732.08	2833.32	95			1691	2272.02	1879.33	53
1692	1966.83	518.786	136.586			1692	2248.86	1889.11	71.7143
1693	468.788	3138.88	132.475			1693	2267.93	713.945	142.264
1694	2588.41	2784.85	124.486			1694	1239.12	2297.14	93.2653
1695	1603.9	2463.02	37.0976			1695	2495.69	2567.72	88.3385
1696	2203.11	815.263	130.667			1696	1813.48	2441.96	11.8148
1697	2067.31	329.974	155.474			1697	2386.68	1960.49	41.7465
1698	534.333	2571.52	122.606			1698	2275.39	2833.52	32.1087
1699	2368.58	3003.61	190.344			1699	2262.78	314.643	143.184
1700	2116.7	2418.09	98			1700	2287.4	2345.17	53.4744
1701	2247.42	1113.65	134.385			1701	1066.22	2649.55	33.1455
1702	1504.74	3130.09	75.0294			1702	1354.6	2905.13	80.5
1703	2596.12	2819.16	171.459			1703	2195.18	1480.43	121.311
1704	1555.35	3086.18	74			1704	2384.35	1731.26	61.5116
1705	1236.78	2932.22	139.513			1705	1984.6	217.6	121.942
1706	2001.26	1281.38	157.569			1706	2273.14	2039.2	79.8163
1707	2623.49	2840.12	182.377			1707	2515.82	656.911	122.544
1708	2206.05	2943.3	186.439			1708	1080.34	2453.95	50.2903
1709	2148.2	2024.17	127.5			1709	2166.95	1910.72	71
1710	939.2	2349.5	52			1710	2220.78	2391.44	76.5176
1711	2070.88	1876.46	104.26			1711	1978.11	2605.04	40.5833
1712	1477.96	2435.7	14			1712	2349.42	2483.27	46.1346
1713	1344.14	2658.61	73			1713	1423.68	2429.41	53.4384
1714	1381.2	2494.46	31			1714	1577.06	2353.08	55.5938
1715	1370.65	3001	59.85			1715	2794.68	2699.18	86.4483
1716	1944.46	2635.05	125.482			1716	1704.4	2424.31	70.4028
1717	2045.96	953.161	167.714			1717	868.75	2919.5	55.5735
1718	2053.59	3094.05	123.591			1718	2608.35	2218.89	75.3651
1719	652.902	2192.8	65.6471			1719	2066.31	2241.05	87.6719
1720	1411.83	2892.92	17.1875			1720	2076.8	351.547	100.438
1721	2124.75	435.714	162.416			1721	2903.01	2827.32	102.198
1722	2253.03	2117.08	90			1722	1295.46	2478.8	37.8696
1723	438.866	2164.01	163.512			1723	2216.04	1824.85	98.56
1724	1216.84	2638.44	111.426			1724	2615.1	745.83	129.48
1725	331.03	3040.37	81.5373			1725	965.167	2223.03	117.567
1726	936.636	2545.56	79.4697			1726	2132.35	2781.39	44.4583
1727	1522.44	3015.05	23			1727	1231.43	2189.99	40.5467
1728	766.567	2311.43	86.4			1728	2257.76	2917.24	75.3785
1729	2201.31	2000.97	148.574			1729	2593.39	372.424	107.409
1730	2107.71	2306.5	62			1730	771.152	2918.11	94.481
1731	2591.23	733.521	121.548			1731	2421.62	313.868	107.434
1732	745.595	2413.96	101.519			1732	1124.45	2762.16	120.247
1733	1548.42	2917.01	96.5132			1733	614.034	2765.11	59.5402
1734	718.732	3093.29	164.304			1734	1770.98	2418.58	47.26
1735	1482.2	2625.54	68			1735	1816.52	2744.03	56.4795
1736	2375.41	801.268	175.577			1736	2224.85	1333.7	79.2642
1737	691.539	2561.59	177.474			1737	2640.5	2587.39	43.3214
1738	2113.66	1427.9	124.532			1738	2542.18	2702.64	56.5641
1739	2448.12	436.815	141.531			1739	3104.27	2598.77	75.5938
1740	2313.74	614.724	124.345			1740	2608.81	2737.4	88.5588
1741	1106.04	2398.7	90.6852			1741	1100.72	2572.27	136.544
1742	2225.58	1706.72	120.467			1742	2153.63	2555.14	45.7119
1743	1424.97	2578.22	11			1743	2444.56	1984.67	40
1744	306.686	2489.71	70.3137			1744	2484.09	2538.93	46.3824
1745	1141.16	2674.38	103			1745	707.873	2615.62	10.4085
1746	740.796	2216.94	111.204			1746	861.406	2369.23	41.6232
1747	2310.91	684.673	124.691			1747	1707.26	2466.61	16
1748	1935.35	2591.82	14.6909			1748	1724.5	2453.15	62.5357
1749	1968.11	2507.79	13			1749	2048.75	2397.13	55.3896
1750	1053.83	2749.24	75.5455			1750	1906.47	2252.84	61.4795
1751	1512.97	2290.83	33			1751	2311.11	1909.47	60.1778
1752	610.409	2574.23	118.091			1752	2430.59	1974.54	40.4571
1753	1057.79	2682.74	67			1753	1974.37	2499.65	95.1373
1754	2251.79	2882.85	198.516			1754	2049.35	307.779	134.471
1755	876.729	2211.6	118.486			1755	2310.78	2381.85	51.6333
1756	2177.02	516.569	153.477			1756	1941.77	2631.26	13.5325
1757	569.879	2736.03	152.638			1757	2357.16	1020.42	91.5185
1758	705.747	2400.89	189.518			1758	1402.63	2221.75	43.6418
1759	1926.37	2468.8	11.5143			1759	1139.64	2460.51	59.3649
1760	685.261	2674.22	141.522			1760	545.143	2326.52	17
1761	2157.61	2564.41	115.296			1761	2196.6	2783.76	94.5244
1762	1097.06	2514.24	89.5063			1762	1285.65	2302.12	65
1763	1624.09	2503.69	83			1763	2065.74	1358.35	94.4583
1764	494.373	2743.46	124.39			1764	964.667	2203.61	32.2807
1765	926.956	2139.47	72.8222			1765	647.205	2587.44	28.3973
1766	554.333	2418.51	179.513			1766	2371.37	2673.42	24.8077
1767	1210.27	2759.29	113.788			1767	2234.62	2381.19	56.6349
1768	1947.5	435.618	166.618			1768	494.422	2577.67	106.522
1769	1722.04	3057.34	74.2766			1769	1832.39	2706.46	54.6056
1770	2094.97	1526.87	117			1770	2460.38	2237.74	41
1771	2123.82	1015.98	168.864			1771	2736.68	2655.21	87.589
1772	2150.18	1954.79	100			1772	2136.88	2479.78	62.4605
1773	378.535	2766.07	63.1163			1773	2103.7	1682.29	107.818
1774	2082.11	320.581	163.452			1774	1096.5	2441.55	19.3182
1775	2333.11	431.242	163.968			1775	2050.29	512.215	105.662
1776	2238.02	1866.23	108.346			1776	732.646	2526.35	34.0833
1777	600.625	2294.34	55.4286			1777	1236.46	2841.56	61.1852
1778	2066.57	3055.55	99.3			1778	926.481	2059.99	60.5584
1779	723.696	3100.41	121.362			1779	2337.41	2391	22
1780	1613.67	2772.67	59.5926			1780	1916.11	2831.31	43
1781	2070.48	858.6	131.583			1781	3059.74	2550.19	91.475
1782	1220.29	2374.75	97.3968			1782	2166.09	1862.18	68.6324
1783	628.397	2128.87	110.587			1783	2402.31	2107.47	49.4545
1784	2150.21	1194.41	126.426			1784	3008.58	2782.88	89.4805
1785	2221.92	857.577	168.513			1785	2072.11	1736.39	100.437
1786	2412.8	878.415	135.585			1786	2231.46	2051.82	64.5238
1787	2175.17	2238.95	63			1787	2175.99	2310.07	83.4328
1788	1473.51	2544.92	60			1788	1406.64	2282.94	47.5417
1789	1268.53	2421	73.5			1789	2119.69	1017.22	127.625
1790	1250.17	2952.81	79.1389			1790	2309.14	329.955	122.621
1791	1974.97	2735.68	110.478			1791	1130.51	2643.75	64.8095
1792	2081.72	1195.3	122.487			1792	791.3	2179.28	82.7
1793	1019.48	2195.54	78.26			1793	1199.76	2609.32	42.3382
1794	1113.44	2327.56	94.4839			1794	1854.83	2546.33	46
1795	661	2333.85	187.245			1795	3001.24	2884.14	100.544
1796	2459.15	2948.73	180.473			1796	2174.91	1076.64	121.625
1797	2036.81	840.707	135.621			1797	556.763	2804.05	33.525
1798	561.757	2259.43	58			1798	2739.01	483.375	109.181
1799	817.075	2197.16	80.5672			1799	1820.76	2428.32	74.3651
1800	1867.02	2497.51	109.267			1800	803.111	2775.28	11.2917
1801	1347.17	2837.85	52			1801	1524.15	2300.13	33.5769
1802	1413.97	2653.41	5			1802	2293.19	1406.23	94.875
1803	1509.09	2501.45	47.7872			1803	2605.27	2627.22	43.6353
1804	1068	2883.7	147.425			1804	676.764	2883.5	47.4167
1805	1172.86	2762.83	142.603			1805	2577.52	2491.95	39.9091
1806	2306.15	357.851	118.627			1806	1363.44	2675.92	47.3699
1807	1525.11	3012.89	18			1807	1809.74	2183.74	11
1808	1373.98	2592.34	40			1808	2534.7	499.707	132.427
1809	2138.95	2570.35	121			1809	2218.94	2496.77	73.2308
1810	290.136	2668.48	76.3182			1810	2099.93	285.885	118.49
1811	2056.77	2621.62	47.4638			1811	2391.21	2246.8	71.5176
1812	2223.75	2697.95	32.377			1812	1533.36	2396.66	39.4262
1813	665.672	2582.13	156.642			1813	1968.84	2449.3	29.4348
1814	1882.18	312.737	137.513			1814	2086.36	1721.41	88
1815	2526.91	2835.54	158.463			1815	1741.39	2439.82	33.6216
1816	2036.38	2395.4	71.7857			1816	1413.52	2458.44	24.9
1817	2254.45	831.5	137			1817	2304.75	2218.97	29.377
1818	693.05	2545.62	144			1818	738.018	2515.58	17.2182
1819	2088.13	1636.05	137.532			1819	1077.11	2699.52	108.754
1820	1372.03	2944.47	73			1820	2206.36	2552.26	32
1821	2011.66	3155.27	92.4429			1821	3024.98	2695.05	81.7544
1822	1742.24	2822.08	17.7255			1822	2031.17	2268.32	21.7119
1823	1333.65	2348.98	85.6863			1823	2461.42	785.392	146.392
1824	2076.64	2902.43	93.4426			1824	1676.11	2324.21	16.3651
1825	1381.57	3106.96	44.7174			1825	980.635	2605.43	22.5405
1826	2263.88	2297.09	102.641			1826	2510.97	486.097	105.083
1827	2367.64	730.342	178.526			1827	1822.48	2469.06	37.4366
1828	678.412	2125.32	77			1828	2225.17	1070.14	123.519
1829	2205.97	1673.1	99.5139			1829	639.4	2773.33	84.6545
1830	2345.75	1148.79	138.404			1830	2458.34	2275.09	99.4684
1831	1117.58	2731.12	109.731			1831	3076.07	2884.38	98.0222
1832	940.082	2584.15	151.507			1832	2527.35	2488.04	33.0833
1833	2356.07	479.441	135.661			1833	1687.33	2702.27	41.102
1834	2248.32	2688.66	179.412			1834	972.766	2212.84	61.6719
1835	773.111	3086.1	142.458			1835	2365.08	2424.37	39
1836	2133.12	1933.28	107.433			1836	2151.27	2098.69	79
1837	2564.84	560.019	142.111			1837	1329.79	2122.93	34
1838	2553.22	3040.65	177.513			1838	1323.25	2531.43	111.597
1839	1332.9	2640.72	120.328			1839	1331.05	2530.55	94.5312
1840	1240.42	2795.19	113			1840	2508.47	2676.55	39.3103
1841	1152.54	2637.52	117.3			1841	2268.37	2091.7	45
1842	600.729	2102.63	81.5			1842	1018.57	3179.54	95.5833
1843	1886.98	2961.05	76.0698			1843	2196.62	1677.49	85.5072
1844	1469.34	2920.53	111			1844	1553.12	2388.23	38.3478
1845	2333.93	2454.75	148.397			1845	1634.75	2372.98	26
1846	1403.23	2600.57	42			1846	1275.61	2494.73	51.5143
1847	1966.92	2955.73	104.469			1847	1118.04	2602.15	45.36
1848	960.264	2212.08	87.5972			1848	2034.78	318.916	111.116
1849	619.968	2521.48	118.403			1849	2114.94	2228.18	40.5065
1850	1937.73	2527.48	66			1850	2032.66	2745.15	79.6479
1851	2053.04	2513.64	57.5132			1851	872.277	2063.83	65.0638
1852	1531.21	2758.62	28.5079			1852	1989.41	2410.64	93.9464
1853	2235.49	478.819	156.486			1853	2080.1	623.593	116.22
1854	2226.43	566.351	160.608			1854	1934.8	2665.35	27
1855	621.763	2755.36	95.4868			1855	880.975	2145.51	77.5443
1856	2125.31	1525.85	118.229			1856	1072.57	2349.84	100.447
1857	2599.25	638.75	107.308			1857	2190.61	2360.29	65.6452
1858	733.915	2808.71	127.424			1858	714.683	2191.71	47.6032
1859	1613.21	3001.39	18			1859	2278.17	564.153	129.52
1860	925.41	2305	87			1860	643.1	2513.62	7.4625
1861	2082.68	805.446	163.541			1861	1094.59	2632.51	78.5333
1862	1943.14	532.231	147.554			1862	2463.31	959.049	127.344
1863	2057.31	432.015	176.615			1863	1907.88	2898.06	40.3284
1864	1556.26	2276.63	75.5161			1864	930.437	2867.28	59.5172
1865	590.81	2819.93	95			1865	2134.69	2121.36	42.9778
1866	2110.24	2213.3	86.78			1866	1650.17	2507	26.6389
1867	838.533	2175.29	106.222			1867	1031.02	2167.04	108.667
1868	1773.8	2573.49	102.267			1868	2258.75	737.662	130.277
1869	2058.55	1672.17	108.755			1869	3205	2782.92	96.2857
1870	628.636	2097.75	123.8			1870	986.051	2620.76	60.5641
1871	1453.84	2300.47	44			1871	1606.95	2498.67	43.4247
1872	2512.75	597.15	121.633			1872	2816.5	2900.1	92.6176
1873	918.444	3064.96	140			1873	631.619	2509.59	5.7619
1874	1878.76	2422.92	61.5316			1874	2326.28	811.525	137.59
1875	477.5	2576.77	80.4355			1875	1499.93	2466.68	82.9107
1876	2111.8	2716.07	112.5			1876	2222.76	2194.63	85.5867
1877	1566.19	2648.26	131.551			1877	833.973	2670.64	11.6351
1878	2164.1	2255.97	133			1878	1424.54	2340.18	30.0256
1879	460.037	2585.48	91.6111			1879	1079.65	2419.17	88.3
1880	1426.43	2419.62	95			1880	2110.4	275.818	125.045
1881	1565.6	2501.5	119.375			1881	3027.62	2624.14	81
1882	2022.95	2693.92	46			1882	2450.35	743.385	131.569
1883	2110.1	559.565	154.565			1883	2314.12	2309.88	22
1884	1922.38	2297.7	102.298			1884	1999.26	296.645	122.566
1885	2013.07	241.405	151.784			1885	2280.67	1555.07	64.4638
1886	615.875	2847.2	157.562			1886	2265.78	402.235	118.382
1887	1271.63	2921.61	28.2391			1887	1911.2	2403.03	95.5286
1888	758.247	2332.71	181.584			1888	2628.53	2353.52	35.7241
1889	2044.45	290.224	160.506			1889	513.333	2575.1	45.5309
1890	2826.86	2893.06	134.475			1890	943.273	2201.79	102.545
1891	1920.88	2393.88	18.8333			1891	2378.46	1028.06	118.691
1892	2189.82	729.239	155.634			1892	1953.11	2303.72	20
1893	2277.08	549.423	146.365			1893	1789.15	2428.25	41.8113
1894	1103.12	2536.62	88.5667			1894	1755.7	2206.08	50.1321
1895	1992.06	691.551	153.391			1895	2198.73	1273.02	105.163
1896	986.81	2682.1	114.444			1896	2379.15	2115.69	56.8542
1897	1610.21	2333.37	37			1897	2176.78	1037.59	124.271
1898	2067.87	2493.07	150.941			1898	2402.12	2766.44	41
1899	844.123	2559.74	88.3509			1899	2431.34	306.337	124.163
1900	843.957	2462.13	117.217			1900	2133.91	2244.59	7.44828
1901	2338.95	3114.95	121.44			1901	1570.69	2658.66	42.3279
1902	662.886	2510.57	74			1902	2334.54	2056.71	61.3171
1903	2111.71	2413.81	145.653			1903	1763.12	2369.81	89.5844
1904	1885.26	2934.37	109.5			1904	1166.27	2933.79	83.5065
1905	1047.1	2401.36	48.3729			1905	2254.94	2249.04	73.5672
1906	1391.81	2907.51	97.6415			1906	2302.62	275.753	114.624
1907	1005.8	2659.2	102.029			1907	2523.4	358.06	133.464
1908	1858.08	2622.03	111.424			1908	1637.6	2350.72	72.2931
1909	1441.89	2906.16	42			1909	2541.71	2392.89	36.9737
1910	2267.09	1015.25	120.273			1910	815.697	2777.26	85.6212
1911	2182.24	2755.8	77.8039			1911	2073	2650.19	30.3889
1912	1030.1	2256.93	149.53			1912	916.087	2202.87	40.913
1913	2482.74	3039.79	149.303			1913	1412.18	2704.09	44.0444
1914	2465.12	736.673	111.788			1914	700.129	2226.58	95.7419
1915	2078	2272.27	104.836			1915	968.843	2328.78	33.098
1916	2336.35	1189.69	140.771			1916	1826.38	2495.53	80.4125
1917	1592.91	3142.43	49.5714			1917	1303.58	2183.56	32.3281
1918	1207.41	2835.8	91.3878			1918	2379.16	2181.39	65.4865
1919	2158	279.833	154.488			1919	1050.11	2511.89	44
1920	594.757	2399.97	87			1920	1396.64	2487.27	51.3559
1921	1285.16	2413.05	55.3621			1921	3162.51	2680.02	71.0566
1922	1456.47	2529.05	114.561			1922	713.835	2349.84	18.5316
1923	2310.51	637.2	142.111			1923	2607.35	636.733	136.65
1924	1352.74	2577.08	9			1924	484.62	2259.73	41.5915
1925	1481.31	2761.08	75			1925	968.974	2761.87	75.6026
1926	824.453	2649.44	100.531			1926	2292.89	2409.89	9
1927	891.02	2379.65	75.6471			1927	1005.43	2490.28	38.6087
1928	1987.12	643.926	154.5			1928	2455.26	2259.48	48.3846
1929	2297.45	632.048	166.482			1929	2294.43	2873.77	110.581
1930	2295.37	2391.2	96.7174			1930	1289.23	2561.53	26.4773
1931	1721.26	2306.93	68			1931	2864.24	2573.9	134.81
1932	1568.23	2509.45	94.5833			1932	971.638	2329.22	105.276
1933	1389.07	2653.19	91			1933	1036.47	2783.92	81.2419
1934	889.5	2538.5	58			1934	1677.82	2802.55	99.5
1935	2592.04	2636.03	188.429			1935	825.944	2323.35	63.3803
1936	1557.04	2998.14	126.16			1936	1013.69	2476.52	112.222
1937	393.2	2648.49	112.822			1937	1988.77	312.168	139.463
1938	2378.27	2280.17	98.5556			1938	1256.29	2391.42	91.5694
1939	1191.25	2817.03	68			1939	1933.28	2300.83	60
1940	2110.09	748.134	156.549			1940	2067.32	424.333	108.771
1941	908.981	2628.1	97.3077			1941	2363.29	1938.8	72.2245
1942	2261.33	1682.38	125.397			1942	2211.89	2297.04	82.3803
1943	1792.1	2413.41	74.4559			1943	3096.1	2719.31	118.293
1944	1871.86	2292.16	77.5217			1944	2615.86	490.356	133.437
1945	2298.86	2097.43	89			1945	2264.99	2262.01	108.486
1946	979.891	2179.56	97.8125			1946	2363.02	1837.32	62.4211
1947	1063.95	2584.23	127.6			1947	629.348	2565.7	3.95652
1948	1954.5	661.861	155.5			1948	2261.72	994.803	104.311
1949	2099.45	2824.32	118.562			1949	2382.35	2324	56.3651
1950	1709.93	2927.31	91.5301			1950	2156.21	1632.15	59.4706
1951	2049.02	684.793	167.476			1951	3175.3	2665.67	74.5714
1952	2254.07	2724.12	151.322			1952	859.459	2521.26	18.449
1953	1537.69	2934.91	46			1953	2436.93	344.933	144.507
1954	1391.34	2733.6	25.7229			1954	2234.27	2327.58	32.5128
1955	447.03	2624.66	77.5075			1955	2543.65	2566.22	94.5443
1956	534.188	2946.29	109.565			1956	1096.66	2438.39	118.641
1957	1704.91	2616.72	107.477			1957	2113.12	785.312	124
1958	1487.87	2695.32	51.3191			1958	2273.79	2216.62	89.4262
1959	2088.26	2671.75	149.574			1959	2566.83	2270.17	70.125
1960	2627.88	2722.53	177.183			1960	817.109	2225.2	55.913
1961	972.229	2604.57	49			1961	615.326	2181.33	18.9565
1962	1630.64	3132.03	74			1962	1648.61	2471.64	83.5303
1963	2321.89	461.508	153.361			1963	2532.38	649.471	105.264
1964	599	2951.29	92.1556			1964	1717.54	2817.6	57.3492
1965	912.958	2539.08	108.771			1965	774.429	2114.76	64.7143
1966	1890.05	2307.57	102.795			1966	2578.69	2435.7	53.3281
1967	1934.28	373.133	162.493			1967	426.955	2500.86	22.3485
1968	1486.09	2774.69	42			1968	2147.73	2367.29	88.7551
1969	2543.35	819.93	124.563			1969	2463.18	2224.47	32.2807
1970	1591.6	2840.36	16.7857			1970	1660.84	2399.19	36
1971	859.662	2264.59	136.493			1971	2472.56	784.985	121.559
1972	1386.44	2916.37	128			1972	2255.75	1308.64	122.536
1973	1192.8	2230.39	75.2609			1973	695.211	2191.92	33.5658
1974	2035.93	3005.92	122.527			1974	1153.05	2665.98	53.3065
1975	2105.73	1719.66	163.457			1975	776.42	2308.06	52.6232
1976	2240.67	689.807	134.246			1976	2351.33	1969.84	71.7895
1977	2229.31	320.459	148.405			1977	960.312	2213.19	42
1978	1671.75	2478.71	25.5395			1978	609.843	2104.76	49.3429
1979	2161.77	1948.3	154.424			1979	2131.27	2686.24	108.882
1980	607.397	2208.35	76.5			1980	802.129	2112.3	65.4429
1981	1372.04	3062.85	78.8043			1981	2332.32	1999.03	46.4068
1982	2123.08	1246.87	169.051			1982	2172.61	944.775	105.535
1983	1537.36	2985.86	31.75			1983	1781	2378.5	38
1984	514.521	2814.04	108.271			1984	524.796	2927.09	26.0185
1985	1723.07	2640.67	78.3684			1985	891.106	2454.05	53.697
1986	423.846	3042.38	128.615			1986	2159.92	2684.32	113.557
1987	2257.47	2034.15	95			1987	572.239	2561.73	56.3944
1988	589.179	2275.11	66.3393			1988	2354.27	1045.34	108.312
1989	2060.62	1717.87	103.443			1989	2381.8	2444.41	29.5375
1990	448.549	3122.48	112.437			1990	2204.49	1167.62	90.2941
1991	1052.68	2922.18	118.685			1991	1488.31	2478.03	37.3231
1992	1855.94	2737.4	133.5			1992	2307.32	2367.25	75.5753
1993	1971.46	400.783	172.735			1993	1934.35	2446.95	71.35
1994	1156.92	2671.22	97			1994	2183.52	2276.88	50.6154
1995	1004.14	2553.5	88.5781			1995	877.079	2272.99	47.4211
1996	1476.87	3043.08	95			1996	2201.09	2321.45	29.2128
1997	2045.5	1297.31	141.778			1997	687	2091.68	33
[truncated: 19,165 more rows]

## Sheet: Figure 2
Figure 2A																						Figure 2C
γ KC								⍺'/β' KC							⍺/β KC							γ KC	γ5	γ4	γ3	γ2	γ1
Bin Center	Sample 1	Sample 2	Sample 3	Sample 4	Sample 5	Sample 6		Bin Center	Sample 1	Sample 2	Sample 3	Sample 4	Sample 5		Bin Center	Sample 1	Sample 2	Sample 3	Sample 4	Sample 5		sample 1	1.12006	1.02597	1.28868	1.01949	0.545812
10	0.287878	0.0521167	0.0544778	0.015321	0.020061	0.0145089		10	0.388607	0.0966056	0.159851	0.125808	0.169117		0	0.0580734	0.173792	0	0	0.00497909		sample 2	1.06988	1.058	1.23367	1.04087	0.597571
20	1.7391	0.813823	0.438849	0.301312	0.597817	0.628718		20	1.28012	0.720151	1.07011	0.889332	1.20983		10	0.734047	0.622978	0.37089	0.1439	0.114519		sample 3	1.10118	1.07679	1.26255	0.913873	0.645608
30	4.30239	2.9466	1.51932	1.66999	2.09838	2.58742		30	2.3225	1.59838	2.18907	2.18212	2.28958		20	1.07087	1.45718	1.84494	0.994218	1.0705		sample 4	1.23814	1.07069	1.06437	1.04781	0.578992
40	6.49894	5.805	4.15544	4.76993	4.65014	5.29574		40	5.05646	3.72371	3.83198	4.17769	4.11517		30	3.06395	3.37959	3.88721	3.01143	2.89285		sample 5	1.10407	0.940575	1.27174	1.08809	0.595522
50	8.17888	8.42688	7.61781	7.88519	7.61916	8.12981		50	7.6167	6.74044	6.32743	6.98885	6.53484		40	5.16853	5.69503	5.75117	5.58593	5.11352		sample 6	1.19569	1.22005	0.931328	1.11523	0.537699
60	9.4132	10.1106	10.6686	10.2446	9.87402	9.542		60	9.62374	8.77355	9.26691	9.17531	8.82876		50	6.91305	7.57199	7.29417	7.61362	7.02051
70	9.34222	10.0064	11.4736	10.74	10.4117	10.3932		70	10.1404	10.8462	10.2971	10.6416	10.1947		60	8.33004	8.74041	8.02168	9.15727	8.33748		⍺'/β' KC	β'2	β'1	α'1	α'2	α'3
80	9.1687	9.76187	10.9682	10.9187	10.4117	10.1562		80	9.93919	10.8989	10.5724	10.5245	10.4679		70	8.97814	8.9249	8.4211	9.59159	9.39803		sample 1	0.727606	1.49926	1.23432	0.869538	0.66928
90	7.89889	8.68746	9.61533	9.81053	9.43669	8.99067		90	9.48201	9.97234	9.39123	9.75229	9.76107		80	9.15004	8.62276	8.71116	9.27501	9.48765		sample 2	0.862996	1.21691	1.06933	0.884879	0.965887
100	7.16934	7.60504	8.08087	8.27333	8.50987	8.1685		100	7.92301	9.12484	8.71631	8.09509	8.65964		90	8.88522	8.52116	8.33314	8.7308	9.26857		sample 3	0.932093	1.29323	0.960894	0.99598	0.817801
110	5.87586	6.00946	6.65234	6.43992	6.72043	6.54834		110	6.80291	7.59672	7.44638	7.27083	7.36308		100	8.41367	7.59338	7.55094	7.7549	8.63374		sample 4	0.693124	1.3647	1.19647	0.746446	0.999267
120	5.13447	5.33194	5.57489	5.71983	5.56091	5.46501		120	5.46336	6.49453	6.4784	6.03445	6.25298		110	7.41016	6.64153	6.93041	6.88103	7.45618		sample 5	0.873451	1.40806	1.02015	0.946583	0.751752
130	4.22352	4.42992	4.43086	4.52479	4.86278	4.59448		130	4.52613	4.98836	4.93761	4.94122	4.73527		120	6.25566	5.70306	6.33128	5.76908	6.06702
140	3.58072	3.60407	3.70449	3.86599	3.75542	3.94641		140	3.59804	4.21113	4.44918	4.09093	4.26261		130	5.20802	4.83677	5.24239	4.69637	5.25543		⍺/β KC	β2	β1	α1	α2	α3
150	2.88666	2.76219	2.89035	2.64031	3.12951	2.68414		150	3.17286	3.21872	3.26362	3.2016	3.30428		140	4.24168	4.00257	4.22482	4.18095	4.29944		sample 1	1.06183	1.23134	0.825142	0.901698	0.979985
160	2.37006	2.55773	2.37281	2.40029	2.37923	2.3988		160	2.28135	2.47223	2.77519	2.42506	2.66684		150	3.49834	3.55873	3.57814	3.47191	3.50528		sample 2	1.11826	1.11186	1.01246	0.673178	1.08425
170	1.96388	1.95237	1.83106	1.8232	2.13048	1.97804		170	1.90189	1.90137	2.02922	2.11271	1.99471		160	2.71086	2.76998	2.91957	2.69224	2.47461		sample 3	1.01186	1.09117	0.929387	0.948282	1.0193
180	1.51432	1.66774	1.37405	1.59849	1.62494	1.61049		180	1.51328	1.48421	1.46974	1.59212	1.5047		170	2.17427	2.28069	2.22772	2.10356	2.12856		sample 4	1.17406	1.12202	0.819852	0.717505	1.16657
190	1.35263	1.34702	1.24694	1.11332	1.1515	1.32031		190	1.17039	1.12853	1.19	1.19735	1.22718		180	1.63535	1.87161	1.77361	1.72157	1.63563		sample 5	0.764831	1.04451	0.983391	0.975582	1.23168
200	1.12391	1.12251	0.992706	0.924365	0.970952	1.02529		200	1.01038	0.966056	0.879179	0.937053	1.04505		190	1.35892	1.43579	1.4479	1.36312	1.34435		sample 6	1.19198	1.17988	0.834509	0.806992	0.986645
210	1.05292	0.873958	0.711238	0.837547	0.806452	0.812497		210	0.827504	0.711369	0.719329	0.789554	0.797884		200	1.0639	1.24596	1.11029	1.0387	0.973412
220	0.792649	0.665491	0.723344	0.663909	0.678061	0.643227		220	0.66749	0.456681	0.612761	0.611687	0.546377		210	0.838579	0.935804	0.88443	0.905262	0.796654
230	0.686174	0.537203	0.596229	0.556662	0.525598	0.580355		230	0.681205	0.390814	0.483993	0.425144	0.450978		220	0.624869	0.767359	0.739402	0.766594	0.582553
240	0.504772	0.541212	0.393451	0.393238	0.421281	0.415921		240	0.4709	0.219558	0.30194	0.403453	0.307879		230	0.487816	0.614957	0.539692	0.549436	0.525294
250	0.496885	0.380853	0.366212	0.280885	0.377147	0.39174		250	0.361176	0.320555	0.28862	0.251616	0.303543		240	0.446003	0.491965	0.41844	0.447398	0.356005
260	0.366748	0.340763	0.287522	0.296206	0.248756	0.309523		260	0.361176	0.223949	0.173172	0.221249	0.242834		250	0.276429	0.347584	0.31383	0.34536	0.318662
270	0.287878	0.300674	0.217911	0.188959	0.1645	0.256323		270	0.278883	0.122953	0.15097	0.203896	0.143099		260	0.246231	0.245983	0.263902	0.25902	0.221569
280	0.299708	0.23653	0.193699	0.20428	0.140427	0.232142		280	0.160015	0.140517	0.0976866	0.151837	0.112744		270	0.144022	0.221919	0.202087	0.198844	0.16182
290	0.209007	0.200449	0.160407	0.0919258	0.1645	0.154761		290	0.150871	0.079041	0.0976866	0.112793	0.121417		280	0.13473	0.15775	0.14265	0.217158	0.134435
300	0.228725	0.152341	0.133168	0.163424	0.100305	0.135416		300	0.169158	0.0966056	0.088806	0.0911023	0.0823902		290	0.125438	0.128339	0.13314	0.138667	0.0821549
310	0.173515	0.148332	0.0968494	0.0766049	0.108329	0.082217		310	0.12344	0.0570851	0.0488433	0.0694113	0.0607086		300	0.0766568	0.0882329	0.0832125	0.0680254	0.0746863
320	0.114362	0.108242	0.0756636	0.0714979	0.0521586	0.101562		320	0.0777214	0.0483028	0.0310821	0.0520585	0.0390269		310	0.0557504	0.0721906	0.0689475	0.112504	0.0522804
330	0.138024	0.120269	0.0756636	0.0919258	0.0521586	0.0918895		330	0.0411466	0.0307382	0.0310821	0.0433821	0.026018		320	0.0580734	0.0561482	0.042795	0.05756	0.0398327
340	0.106475	0.0681527	0.0484247	0.0817119	0.0561708	0.0386903		340	0.0548622	0.0175647	0.0266418	0.0347057	0.0173453		330	0.0301981	0.0534745	0.061815	0.0366291	0.05477
350	0.0828141	0.0561257	0.0544778	0.0612839	0.0441342	0.0386903		350	0.0457185	0.0439116	0.0088806	0.0477203	0.0216816		340	0.034844	0.0508008	0.0404175	0.0183145	0.0199164
360	0.0394353	0.0521167	0.0302654	0.0561769	0.0361098	0.0290177		360	0.0640059	0.026347	0.0133209	0.0303674	0.013009		350	0.0255523	0.0240635	0.014265	0.0130818	0.027385
370	0.06704	0.0360808	0.0453981	0.020428	0.0160488	0.00967258		370	0.0411466	0.00878233	0.0088806	0.00867641	0.0216816		360	0.0185835	0.0160424	0.0166425	0.0235473	0.0199164
380	0.0788706	0.0240539	0.0272389	0.015321	0.0160488	0.0580355		380	0.0228592	0.00878233	0.0266418	0.0260292	0.0216816		370	0.0325211	0.0240635	0.0118875	0.0104655	0.00995818
390	0.0354918	0.0160359	0.0211858	0.015321	0.020061	0.0241815		390	0.0320029	0.00439116	0.0088806	0.00867641	0.0216816		380	0.0069688	0.0106949	0.014265	0.0235473	0.00248954
400	0.0394353	0.0240539	0.0211858	0.020428	0.0160488	0.00483629		400	0.0137155	0.00439116	0.0044403	0.0130146	0.0173453		390	0	0.0160424	0.0118875	0.0104655	0.00746863
410	0.0157741	0.0240539	0.00907963	0.020428	0.0040122	0.0193452		410	0.0274311	0.00439116	0.0044403	0.021691	0.00867265		400	0.00232293	0	0.0071325	0	0.00746863
420	0.0157741	0.0160359	0.00907963	0.010214	0.00802439	0.0241815		420	0.0182874	0	0.0133209	0.00433821	0.00433633		410	0.00464587	0.00802118	0.0023775	0	0.00248954
430	0.0236612	0.0200449	0.00907963	0.025535	0	0.00967258		430	0.00914369	0.00439116	0.0088806	0	0		420	0	0.00534745	0.004755	0.00523273	0.00248954
440	0.0157741	0.00400898	0.00605309	0.015321	0.00802439	0.00967258		440	0.00457185	0.00439116	0	0.00867641	0		430	0.00232293	0.00534745	0.004755	0.00523273	0.00248954
450	0.0315482	0.00400898	0.00302654	0.00510699	0.0040122	0.00967258		450	0.00457185	0	0	0	0		440	0.00232293	0	0.004755	0.00261636	0
460	0.00788706	0.0120269	0.00605309	0.015321	0	0		460	0.0182874	0	0	0.00433821	0.00433633		450	0	0.00267373	0	0	0.00248954
470	0	0.00400898	0.00302654	0.010214	0	0		470	0.00457185	0.00439116	0.0044403	0.00867641	0.00867265		460	0	0	0	0	0.00497909
480	0.0118306	0.0120269	0.00907963	0.00510699	0.00802439	0.00483629		480	0	0.00439116	0.0044403	0	0.00433633		470	0	0	0	0.00261636	0
490	0	0	0.00302654	0	0	0.0145089		490	0.00457185	0.00439116	0	0	0.00433633		480	0	0.00267373	0	0.00261636	0.00248954
500	0	0.00400898	0	0.010214	0	0		500	0.00457185	0	0	0	0		490	0	0	0	0	0
510	0.00394353	0	0	0	0	0.00483629		510	0	0.00439116	0	0	0		500	0.00232293	0	0	0	0
520	0.00788706	0	0	0	0	0		520	0	0	0	0	0		510	0	0	0	0	0
530	0.00394353	0	0	0.00510699	0	0.00483629		530	0	0	0	0	0		520	0	0	0	0	0.00248954
540	0	0	0	0	0	0		540	0	0	0	0	0		530	0	0.00267373	0	0	0
550	0.00394353	0	0	0	0	0		550	0.00457185	0	0	0	0		540	0	0	0	0	0.00248954
560	0.00394353	0.00801796	0	0	0	0.00483629		560	0	0	0	0	0		550	0	0	0	0	0
570	0.00394353	0	0	0	0	0		570	0	0	0	0	0		560	0	0	0	0	0
580	0	0.00400898	0	0	0	0		580	0.0137155	0	0	0	0		570	0	0	0	0	0
590	0	0	0	0	0	0.00483629		590	0	0	0	0	0		580	0	0	0	0	0
600	0	0	0	0	0.0040122	0		600	0	0	0	0	0		590	0	0	0	0	0
610	0.00788706	0	0	0.00510699	0	0		610	0.00457185	0	0	0	0.00433633		600	0	0	0	0	0
620	0.00788706	0	0	0	0.0040122	0		620	0.00457185	0	0	0	0		610	0	0	0	0	0
630	0	0	0	0	0	0		630	0	0	0	0	0		620	0	0	0	0.00261636	0
640	0	0	0	0	0	0		640	0	0	0	0	0
650	0	0	0	0	0	0		650	0	0	0	0	0
660	0.00394353	0	0	0.00510699	0	0		660	0	0	0	0	0
670	0	0	0	0	0	0		670	0.00457185	0	0	0	0.00433633
680	0	0.00400898	0	0	0	0		680	0.00457185	0	0	0	0
690	0	0	0	0	0	0		690	0.00457185	0	0	0	0
700	0	0	0	0	0	0		700	0	0	0	0	0
710	0	0	0	0	0	0		710	0	0	0	0	0
720	0.00394353	0	0	0	0	0		720	0	0	0	0	0
								730	0.00457185	0	0	0	0

## Sheet: Figure 2B reconstructions
γ KC	Note: z values need to be corrected according to the voxel size					⍺'/β' KC						⍺/β KC
Spot	X	Y	Z	Brp::rGFP intensity		Spot	X	Y	Z	Brp::rGFP intensity		Spot	X	Y	Z	Brp::rGFP intensity
0	858.456	2074.15	75.6228	266603		0	1923.4	2460	40.0936	627291		0	547.269	3036.61	40.9604	756531
1	594	2804.54	70.3097	254203		1	1882.5	2299.26	56.9422	593324		1	957.233	2971.65	40.1143	667446
2	1710.62	2304.6	33.3269	239353		2	2026.64	2238.85	54.4438	584178		2	793.335	2998.81	71.126	652171
3	477.311	2892.95	82.0583	229662		3	1932.11	2285.74	54.6583	579308		3	2011.72	2758.13	34.4126	623252
4	1382.91	2406.61	55.3333	222194		4	2017.65	2401.33	51.4167	532695		4	750.519	3049.8	36.9574	622405
5	678.333	2137.4	83.4615	221877		5	1824.18	2299.06	54.3149	523401		5	969.243	2848.71	35.1277	614107
6	1049.3	2112.03	53.1456	219991		6	1782.89	2423.96	61.7118	504238		6	433.277	3205.42	60.9805	584345
7	567.182	2727.74	61.8099	214758		7	1783.31	2443.03	62.5226	503213		7	2492.29	326.336	114.996	575955
8	530.333	2351.79	82.4028	202663		8	1968.06	2287.74	52	500206		8	2123.64	362.379	106.197	571429
9	1714.01	2383.96	31.5541	201024		9	1598.54	2364.58	79.0264	479975		9	546.046	2868.36	61.731	569999
10	757.379	2248.08	67.2069	196952		10	2052.19	2294.64	46.4491	433972		10	1743.59	2663.77	26.4951	569886
11	658.108	2790.64	77.5405	196621		11	2277.89	2363.12	48.91	424003		11	2433.72	319.454	120.339	569086
12	1706.52	2359.7	34.4778	194515		12	1760.88	2447.18	68.0365	405945		12	750.04	3069.45	32.763	568549
13	1822.41	2230.09	43.4037	191940		13	1918.52	2297.46	60.1854	397709		13	624.492	2764.37	62.7207	566989
14	1877.58	2277.83	39.8305	191387		14	2252.33	1944.25	62.5298	396754		14	805.371	3077.72	40.5676	563851
15	952.52	2192.49	81.1067	189919		15	1794.55	2329.62	79.5594	396173		15	1710.19	2619.91	32.4	563149
16	1390.47	2374.37	34.4586	189733		16	2068.23	2294.38	49.7692	393517		16	605.256	3267.76	51.4524	561715
17	2003.23	2059.16	48.6818	188376		17	1935.29	2288.71	44.1497	390991		17	1735.25	2633.59	35.12	561055
18	1473.76	2539.62	61.5152	187459		18	1717.03	2401.62	67.2028	379639		18	698.348	3019.57	61.5	560594
19	696.009	1992.17	102.505	186961		19	1770.87	2282.25	61.213	372909		19	702.2	3270.25	55.1385	560366
20	382.344	2593.6	70.3033	185773		20	1817.38	2306.93	53.4179	372006		20	513.336	2867.55	64.4218	558219
21	1382.65	2474.97	43.5217	185641		21	1893.8	2264.71	65.2537	366688		21	601.443	2916.08	62.4089	557117
22	325.544	2113.77	92.4889	183905		22	1754.93	2306.3	58.8982	366219		22	752.258	3229.63	67.176	557032
23	766.798	2242.17	71.3936	179503		23	1797.19	2455.35	40.2188	366136		23	593.418	3072.47	43.8424	555131
24	1552.91	1979.95	47.7705	177655		24	1916.62	2280.58	64.0551	361172		24	2187.33	337.301	95.8686	551413
25	1186.73	2344.3	83.5244	177069		25	2003.75	2314.79	60.4103	358552		25	698.634	3177.35	66.9031	551200
26	1698.26	2438.08	35.4805	176844		26	2191.27	2179.94	49.9435	354529		26	976.583	2916.17	40.1181	548019
27	672.548	2830.11	82.5968	175370		27	1825	2281.46	58.8387	354521		27	2526.04	428.622	84.4209	546054
28	348.787	2145.03	100.64	175107		28	1819.51	2266.54	65.9706	352537		28	682.702	3199.01	55.7381	545301
29	584.586	2701.72	64.5057	173518		29	2057.22	2409.28	54.0709	352460		29	981.303	2970.32	77.5158	544165
30	598.296	2277.46	95.376	173089		30	1708.89	2381.1	65.6992	351447		30	725.275	3144.87	72.0104	541752
31	691.816	2030.5	100.757	172957		31	2146.68	2224.43	32.0472	345727		31	797.556	3087.39	35.05	538359
32	629.992	2919.55	86.8015	172609		32	2177.59	2024.48	53.4112	344862		32	2121.97	401.376	104.099	536301
33	464.514	2798.91	67.3919	172402		33	1769.81	2452.84	69.8777	343497		33	525.888	3005.52	38.1739	536147
34	1364.38	2068.61	40.625	172297		34	2301.05	2051.65	49.7107	341568		34	2107.16	2687.12	15.3146	535143
35	1891.91	2084.21	38.7009	172161		35	2162.94	1906.75	71.8442	340622		35	838.144	2867.75	60.8527	534659
36	650.547	2202.27	79.4884	172155		36	1596.46	2470.09	50.0625	339117		36	833.044	2907.73	72.2316	533834
37	1781.46	2139.12	34.2195	171435		37	2313.04	2045.32	46.094	335984		37	789.953	3211.53	61.386	533436
38	1766.44	2120.67	41.5256	170417		38	2210.67	2312.78	75.494	335469		38	2149.77	488.847	95.0278	530190
39	503.908	2576.29	62.5977	170171		39	1680.6	2398.9	70.8881	334400		39	1378.42	2617.03	34.246	529818
40	601.074	2827.78	74.2553	169357		40	1698.6	2304.72	64.0352	333618		40	829.299	3019.71	31.2293	528170
41	510.932	2812.81	72.5068	166637		41	1957.6	2346.14	55.012	332941		41	1356.59	2701.92	35.9153	525123
42	425.886	2654.29	89.5833	165279		42	1647.07	2330.12	71.9922	331756		42	535	2791.41	55.787	523769
43	903.716	2047.82	97.8243	164565		43	1926.89	2486.58	55.6882	329714		43	2482.82	370.022	94.6906	523746
44	725.539	1973.16	97.6316	164331		44	1906.47	2280.92	61.1702	329219		44	591.139	2945.67	40.4615	523574
45	972.261	2165.4	82.4659	163024		45	1854.42	2311.36	58.7857	325279		45	661.603	3092.16	35.2434	522163
46	1363.38	2398.77	38.5455	162967		46	2083.84	2259.2	69.4928	323280		46	2090.85	408.696	90.548	521636
47	435.965	2188.13	105.791	162639		47	675.17	2401.71	125.714	323051		47	858.939	2940.81	50.5415	520560
48	1369.05	2459.91	46.1351	162336		48	2318.5	2048	45.7886	322243		48	802.452	2855.36	39.9619	520122
49	1124.25	2006.69	77.2636	160043		49	2212.4	2305.46	45.2093	320832		49	1245.47	2727.38	30.4719	519553
50	893.635	2035	98.8087	159472		50	2205.46	2151.7	54.2143	320060		50	1077.58	2815.64	52.8204	515389
51	974.884	1946.89	104.463	159259		51	1833.85	2287.73	59.0534	318115		51	440.846	2794.29	57.2158	515174
52	886.628	2177.87	102.462	158740		52	1817.99	2415.53	63.5614	316919		52	966.055	2779.29	58.3917	514728
53	1728.93	2264.56	43.6316	158139		53	2261.79	2142.18	67.8309	316385		53	692.019	2731.38	56.1579	513958
54	1287.89	2213.87	45.234	157326		54	1887.95	2326.74	76.0728	315916		54	691.926	2892.39	67.9362	513598
55	516.263	2488.23	77.5657	156619		55	1837.2	2312.48	49.7805	314697		55	1712.9	2692.69	17.2062	510343
56	1680.43	2474.54	35.5281	156224		56	2166.97	2091.11	22.5802	312820		56	2395.24	2658.78	33.3628	509802
57	1789.14	2041.09	63.5421	154025		57	2129.1	2416.07	49.4098	311010		57	769.735	2914.17	35.173	509011
58	1243.74	2296.15	47.3973	153906		58	2215.62	2336.74	45.7466	310787		58	2166.12	339.315	99.7446	508180
59	303.68	2575.99	80.6875	153801		59	1651.9	2590.74	48.3484	310671		59	575.249	2774.53	68.009	504645
60	855.736	2376.73	66.5714	153752		60	2237.7	2012.87	26.9798	310304		60	664.191	3021.88	62.3502	504308
61	741.802	2770.95	92.8889	152687		61	2165.01	2127.67	26.6667	309447		61	570.05	2859.55	43.9308	503679
62	1630.9	2437.74	41.378	152461		62	2056.04	2249.38	68.9709	308480		62	2008.38	483.786	104.335	500437
63	1129.78	2263.14	52.5844	151900		63	1700.8	2411.92	55.6525	308257		63	2514.16	2837.69	48.6042	500235
64	1272.49	2331.53	36.9333	151627		64	2044.96	2240.71	51.819	307974		64	524.402	2825.1	63.5587	498432
65	949.375	2089.96	69.7083	150711		65	1564.48	2369.92	83.7117	307836		65	811.092	3105	38.8562	497926
66	469.516	2750.68	71.4396	150401		66	1937.02	2353.48	56.1926	307382		66	2011.17	443.564	106.231	496831
67	1654.11	2450.22	44.5333	149763		67	2278.18	2015.77	57.3973	307363		67	1358.75	2755.21	30.0933	496640
68	594.156	2252.86	105.177	149745		68	2242.71	2286.97	68.8627	307321		68	2374.31	428.538	82.191	496305
69	1690.53	2542.63	40.4656	149683		69	2033.57	2299.5	48.0885	305740		69	1434.01	2755.39	36.3677	495457
70	577.343	2218.15	74.6667	149668		70	2060.97	2383.13	52.3538	305367		70	609.264	2879.17	41.3368	494061
71	742.797	2538.73	69.4865	149001		71	1716.31	2301.51	66.2595	303221		71	611.561	2865.26	34.7703	493569
72	1699.43	2320.74	33.2206	148714		72	699.503	2319.3	126.503	302959		72	643.981	3240.84	57.0463	493568
73	304.476	2117.56	98.5714	148356		73	1691.62	2379.83	67.8571	302720		73	1909.21	2709.34	36.355	492340
74	1123.36	2090.31	99.5604	148067		74	2292.64	2043.36	53.9439	301164		74	680.645	3103.88	65.925	491948
75	1648.99	2178.09	34.4922	147771		75	1884.92	2327.32	62.0652	299336		75	578.048	3040.17	55.9634	491665
76	722.379	2758.89	72.4242	147443		76	2079.63	2277.61	43.1857	299323		76	1470.34	2689.1	25.0065	490065
77	465.107	2238.93	82.4286	147434		77	1753.64	2419.85	60.8632	299004		77	1037.5	2921.04	64.7717	488452
78	450.034	2424.19	63.6629	147233		78	2239.68	2217.92	42.2945	298383		78	2182.88	387.546	122.873	486741
79	1312.61	2108.4	41.8095	147148		79	2125.11	2422.42	56.8811	298011		79	1700.36	2728.58	37.3158	486727
80	1850	2023.7	44.3836	147084		80	1900.63	2283.04	66.1825	297847		80	523.46	2845.51	59.0133	486421
81	1799.86	2565.59	45.2588	146988		81	2195.66	2021.66	77.7966	297573		81	1136.73	2816.07	66.4573	485860
82	2040.75	2097.25	40.5738	146885		82	2159.64	2273.54	51.9205	297357		82	625.121	2835.41	36.3404	485683
83	922.944	2379.21	60.5278	146764		83	1617.28	2450.67	50.5118	295819		83	2128.07	457.586	102.99	484825
84	430.82	2206.17	110.875	146531		84	1939.48	2279.05	61.9919	295308		84	2089.04	426.644	85.1152	484074
85	1577.03	2421.33	52.0583	146280		85	2066.44	2231.5	55.1057	294352		85	960.32	2903.7	76.285	483890
86	452.286	2183.51	92.5584	146279		86	1765.62	2298.19	63.4508	293841		86	483.935	2716.32	62.0387	483771
87	1542.45	2398.37	34.6667	146262		87	2249.65	2080.58	77.4698	292474		87	792.493	3015.68	30.7895	483728
88	447.324	2725.49	69.1389	145437		88	1798.07	2291.96	55.1915	290956		88	505.436	2864.64	51.9333	482969
89	756.322	2646.09	81.2231	145316		89	1998.73	2263.13	71.2276	290029		89	528.376	2983.58	41.8859	481075
90	556.189	2479.68	84.4737	145148		90	2002.02	2446.54	52.4503	289725		90	686.656	3223.01	56.9247	480719
91	714.159	2084.03	84.4579	145072		91	1965.01	2284.54	72.1478	288144		91	594.848	2914.19	35.9091	480699
92	907.864	2043.01	95.5062	144695		92	2203.34	2083.87	58.2339	287992		92	906.322	2910.99	38.1168	480565
93	1267.49	2220.31	43.2966	144190		93	1817.01	2257.11	66.6712	287764		93	2355.67	387.243	88.7525	480231
94	763.902	2125.79	79.439	143937		94	1947.22	2338.82	48.1848	287194		94	2373.36	445.353	113.788	479118
95	2029.79	2698.88	60.537	143650		95	2027.53	2393.59	67.5948	285702		95	2275.67	2795.56	24.6294	478299
96	632.5	2029.6	116.525	143447		96	1712.06	2306.58	56.32	285125		96	1391.5	2550.69	40.9483	477873
97	1399.64	2367.84	36.427	143396		97	1838.18	2424.84	59.4504	283611		97	1385.92	2635.57	30.1214	477569
98	1314.57	2256.07	32.4737	143152		98	2088.64	2310.43	76.1176	283271		98	834.894	2915.94	72.5796	477061
99	1873.23	1985.44	45.5641	143109		99	2015.93	2277.74	69.082	282616		99	2418.85	803.798	94.7391	476819
100	727.177	2157.4	83	142800		100	2252.48	2021.97	30.3621	280785		100	592.5	3044.93	45.4857	476491
101	1007.69	2527.13	71.494	142771		101	1989.84	2244.89	53.5794	280233		101	2326.13	1242.99	89.5852	475347
102	1731.3	2389.85	29.1635	142385		102	744.112	2581.98	115.508	279715		102	508.621	2890.42	41.4576	474832
103	1186.69	2147.61	69.7537	142373		103	2283.26	2260.63	35.4649	279635		103	585.493	2898.47	41.9933	474538
104	377.254	2673.19	65	142302		104	1719.03	2313.46	67.6827	279625		104	700.781	2871.35	36.1872	473998
105	942.058	2419.58	95.5072	142131		105	1785.96	2408.39	60.9076	279593		105	685.423	2867.19	30.8993	473672
106	439.96	2710.05	99.3016	141260		106	2127.91	2278.62	66.8125	279486		106	1162.87	2811.96	65.0601	472949
107	1518.34	2673.69	62.6769	141229		107	2081.72	2307.49	32.7197	277311		107	584.643	3225.16	52.2415	472812
108	538.146	2565.45	109.992	140849		108	1928.26	2324.34	54.8712	276471		108	2019.58	487.731	100.915	472436
109	358.031	2141.53	103.695	140677		109	865.973	2365.77	126.322	276406		109	660.199	2975.72	40.0785	472138
110	2090.17	2372.5	42.5076	140642		110	2146.14	2255.35	52.1607	275955		110	2472.51	2871.4	41.5659	471552
111	599.056	2451.4	81.5393	140201		111	2059.38	2246.5	50.8224	274929		111	2197.04	419.223	88.7296	471024
112	1036.43	2123.15	55.3824	139992		112	1865.73	2264.32	66.0877	274708		112	550.264	2828.38	48.2638	469058
113	1348.66	2362.35	34.7903	139802		113	1766.83	2394.33	67.8017	273359		113	2120.18	583.026	105.247	468680
114	1736.38	2141.44	29.3704	139720		114	1828.2	2349.07	53.8586	273312		114	783.344	3054.21	36.8609	468398
115	344.444	2687.06	82.3951	139671		115	1997.42	2250.53	54.9899	273159		115	1194.27	2638.22	40.1458	467592
116	1240.61	2214.06	51.4911	139624		116	1963.88	2301.4	48.4191	272449		116	693.911	2784.52	44.4469	464961
117	1752.66	2396.77	61.5761	138701		117	2281.12	2325	51.8758	272394		117	2452.29	420.524	90.6463	464595
118	1349.08	2370.21	36.3067	138517		118	1930.53	2314.39	53.3178	271871		118	1407.9	2721.03	34.9618	464000
119	1505.46	2205.51	78.2562	138235		119	1859.52	2301.07	62.1489	271702		119	801.465	2932.02	29.8256	462965
120	583.911	2085.32	89.7468	137927		120	895.155	2415.49	111.423	271623		120	1451.8	2580.65	38.6061	462956
121	1106.72	2452.31	67.3861	137833		121	1762.05	2455.38	67.2992	271183		121	723.259	2979.39	37.8541	462929
122	557.627	2694.73	78.4217	137456		122	1948.56	2439.17	52.9291	271097		122	537.257	3007.78	43.0702	462833
123	1225.96	2110.6	56.1346	137292		123	1875.44	2358.16	40.3723	270681		123	836.512	3003.92	52.9488	462531
124	1959.88	2439.43	50.0693	137060		124	1839.9	2281.25	62.2545	270560		124	2070.64	461.685	89.8066	462457
125	660.543	2458.21	97.6143	136808		125	2233.98	2322.28	42.1522	270528		125	983.69	2748.47	56.1988	462276
126	1114.97	2229.9	109.83	136356		126	1876.51	2255.11	59.9241	270311		126	1651.52	2670.12	39.2667	461973
127	1152.14	2326.98	56.2121	136157		127	2289.15	1487.01	110.571	269940		127	1644.19	2707.27	17.9085	461806
128	1267.02	2184.68	36.4907	136055		128	2389.3	2034.01	43.7862	269597		128	611.148	2744.32	66.162	460998
129	511.547	2119.57	126.907	136054		129	1759.04	2478.37	55.9609	269488		129	839.187	2830.25	39.7861	459635
130	311.578	2626.7	72.7812	136033		130	1928.69	2376.15	53.7541	269261		130	502.983	2774.28	46.5434	458375
131	1021.7	2058.55	57.7727	136031		131	1897.88	2373.87	49.4787	268056		131	551.582	2917.85	56.7912	458340
132	982.095	2087.99	87.5	135944		132	2234.84	2024.37	51.031	267265		132	1302.87	2677.53	30.8618	458242
133	1037.45	1989.76	72.9919	135930		133	1756.87	2319.01	61.1166	266646		133	2256.96	2742.91	33.7845	458047
134	443.508	2212.79	104.581	135505		134	1521.54	2336.98	93.6395	266586		134	636.926	2883.17	56.0522	458032
135	659.103	2193.97	70	135496		135	2129.43	2241.54	56.1368	266484		135	734.655	2834.47	72.9867	457513
136	986.925	2156.33	70.4839	135380		136	1763.46	2429.15	63.6792	265997		136	566.148	2828.02	53.6127	457418
137	966.095	1959.32	91.4762	135026		137	2028.8	2267.85	66.4296	265538		137	2299.91	2795.02	28.1414	456473
138	867.466	2485.73	95.5114	134519		138	1724.04	2391.82	66.497	265432		138	873.977	2951.24	36.269	455704
139	899.205	2099.33	94.4615	134258		139	2373.83	2000.19	72.5248	265336		139	537.145	3070.33	62.0415	454556
140	445.408	2200.72	88.4342	134008		140	1919.31	2427.6	40.9858	265007		140	601.853	3111.22	41.8059	454314
141	1600.94	2187.49	80.7089	134007		141	1883.73	2368.65	60.0588	264357		141	700.443	2994.26	37.7071	453622
142	1771.12	2268.96	43.3582	133939		142	1942.36	2295.25	56.3796	264269		142	2096.48	447.07	84.4076	452992
143	423.338	2209.89	80.2958	133820		143	2025.31	2268.6	88.4463	264247		143	2103.27	2820.83	24.078	452433
144	1330.95	2275.95	61.8073	133472		144	777.338	2387.25	118.721	263680		144	2172.42	492.644	94.3244	452338
145	546.876	2226.84	106.086	133433		145	1827.05	2260.22	68.9429	263516		145	652.201	3247.03	51	451884
146	488.623	2940.51	79.5455	133384		146	1883.79	2337.67	60.5794	263153		146	2103	337.874	98.835	450447
147	845.022	2015.87	111.522	133317		147	2039.06	2381.91	100.038	262889		147	704.472	3036.7	34.8135	450333
148	561.519	2115.31	107.877	133280		148	1815.75	2274.71	63.9535	262632		148	651.91	3029.42	57.2921	449803
149	1028.33	2447.8	64.5529	133265		149	1995.96	2326.8	47.956	262512		149	505.593	3049.75	45.9299	449582
150	333.29	2222.84	98.46	133039		150	1613.27	2460.63	54.8087	262415		150	2335.14	393.01	89.2268	449303
151	590.653	2113.67	102.893	132856		151	1088.51	2454.38	93.2012	262234		151	846.109	2912.48	37.5417	448838
152	1613.95	2232.79	29.9048	132796		152	1786.55	2441.19	67.9714	261974		152	876.156	3105.57	68.1818	448289
153	541.107	2321.19	85.44	132715		153	2087.15	2360.84	48.0603	261637		153	505.082	2784.36	42.9592	448084
154	1659.25	2258.85	29.8333	132462		154	2097.22	2321.72	33.5667	260810		154	1195.16	2703.88	54.2955	447710
155	1254.94	2321.04	51.338	132286		155	1236.39	2310.38	110.857	260310		155	1561.67	2705.21	34.6567	447502
156	551.311	2048.44	94.6066	132036		156	2084.41	2356.49	61.1569	260298		156	461.477	2748.62	51.7841	446986
157	1119.64	2102.75	60.2344	131935		157	1863.23	2389.81	37.6289	259256		157	1303.01	2616.42	40.0407	446550
158	1674.79	2468.26	63.4691	131821		158	2241.68	2431.2	41.404	259202		158	658.183	2890.43	30.0947	445999
159	1396.01	2226.34	37.6797	131787		159	2295.27	2185.18	46.9394	259104		159	1805.02	2599.61	28.2	445837
160	825.272	1993.74	105.815	131716		160	958.316	2457.28	99.2158	258856		160	2129.88	502.682	81.0168	445614
161	867.431	2084.74	100.542	131696		161	2256.47	2315.31	71.6132	258851		161	499.39	2892.51	44.1104	445193
162	1774.54	2136.83	31.8148	131616		162	2157.59	2426.04	51.2432	258240		162	635.046	2792.71	49.0914	444531
163	314.812	2396.26	99.575	131543		163	1860.18	2288.36	58.9388	258096		163	1011.58	2813.29	58.2143	444387
164	764.097	2114.92	80.6111	131509		164	2037.32	2379.43	47.56	257697		164	2301.05	422.885	125.537	444310
165	544.462	2626.05	82.7019	131493		165	1944.55	2266.26	56.6897	257574		165	2265	738.353	106.469	444252
166	642.865	2327.42	80.0946	131330		166	2277.28	2059.4	45.6822	257559		166	2069.01	395.045	92.3896	444041
167	720.704	2349.73	70.3611	131308		167	2279.86	2236.75	43.9167	257529		167	548.297	2844.86	54.0909	444013
168	1258.37	2233.87	50.0222	130954		168	2218.5	2086.74	55.9918	257368		168	1670.46	2732.11	39.9345	443354
169	1694.25	2073.1	28.8269	130869		169	1739.98	2312.8	59.5248	257216		169	820.803	2955.21	38.8384	443251
170	456.716	2608.35	62.4189	130840		170	521.126	2535.87	124.752	257199		170	533.22	2686.93	60.8829	442423
171	446.582	2624.46	77.2551	130687		171	1880.6	2355.75	44.227	256945		171	663.186	3012.19	67.887	442388
172	1417.89	2247.12	53.4382	130622		172	2177.16	1968.06	59.7723	256852		172	2206.15	374.862	122.045	441669
173	1218.22	2017.71	61.6308	130569		173	1655.96	2281.63	56.2169	256804		173	550.864	2744.82	48.6283	441487
174	448.437	2312.02	86.2184	130278		174	2257.1	2019.01	75.0971	256652		174	2143.6	383.377	78.6557	441470
175	936.783	2002.22	67.5333	129854		175	2157.22	2070.48	36.5149	256458		175	395.316	2924.8	56.7783	440479
176	946.337	2498.67	85.413	129750		176	1913.36	2309.69	51.1342	256333		176	840.025	2942.73	66.596	440474
177	735.821	2117.48	77.6071	129672		177	2168.84	2313.7	70.3392	256285		177	2358.72	2748.82	41.9767	440033
178	1913.81	2738.41	71.73	129216		178	1926.2	2256.66	57.1497	256214		178	650.127	3034.96	39.6392	439887
179	469.466	2426.78	112.521	129121		179	1878.06	2517.29	41.4141	255977		179	630.708	2705	57.5497	439635
180	1056.75	2265.53	61.5258	128937		180	1819.48	2359.74	50.381	255819		180	787.953	2977.7	28.1875	439156
181	767.082	2556.84	78.5059	128881		181	1782.92	2416.38	63.5263	254993		181	2323.57	2757.67	57.5067	439048
182	1619.01	2453.41	45.5517	128465		182	1006.77	2508.52	111.508	254787		182	576.247	2893.46	44.0065	438957
183	1728.97	2546.7	39.5729	128259		183	1716.5	2287.01	77.0132	254361		183	2330.27	333.208	93.3868	438930
184	671.98	2199.09	119.49	128103		184	2180.42	2277.9	59.8981	254137		184	702.081	2976.73	35.1611	438765
185	816.516	2607.56	77.4615	127980		185	2131.18	2136.46	66.6638	254100		185	845.862	3067.37	56.8563	438705
186	1846.04	2317.93	36.4444	127887		186	1885.4	2461.2	58.2376	253986		186	1108.49	2804.95	54.1917	438479
187	455.064	2733.53	105.5	127698		187	2200.85	2035.6	50.6495	253754		187	1054.07	2894.51	66.3444	438084
188	1327.19	2216.95	51.7107	127452		188	2199.46	2351.55	47.496	253708		188	880.976	2987.79	37.3471	437785
189	1132.33	2247.43	55.123	127386		189	2110.5	2143.34	66.4094	253650		189	763.161	2736.75	56.9195	437649
190	2313.15	2007.65	69.3882	127294		190	2031.55	2362.33	54.2764	252639		190	2228.24	2864.06	23.1974	437475
191	1641.92	2341.13	38.6413	127208		191	2331.43	1929.24	33.8702	252636		191	1579.6	2559.61	29.4422	437370
192	603.384	2442.56	83.3837	127057		192	2005.08	2395.62	72.4336	252487		192	2406.9	2055.75	55.308	437087
193	664.29	2787.12	75.3333	126943		193	1971.4	2256.12	53.975	252207		193	2278.38	2646.99	44.3973	436748
194	577.568	2076.7	117.519	126931		194	2113.34	2437.03	51.8226	251916		194	2162.19	515.545	92.1139	436484
195	575.964	2301.16	69.2857	126869		195	1452.01	2437.47	66.538	251504		195	468.98	2900.45	63.8889	436317
196	1724.84	2306.76	33.3371	126796		196	752.716	2426.51	117.517	251383		196	566.331	3065.24	40.5221	436163
197	966	1954.92	97.5556	126455		197	1872.88	2399.91	72.0803	250822		197	2029.17	462.634	88.7164	435881
198	1555.89	2125.5	75.5048	126201		198	1801.84	2278.19	64.7422	250658		198	673.551	3126.71	57.8019	435666
199	879.319	2453.33	85.9565	126033		199	2330.41	2008.92	64.4286	250203		199	2114.29	274.411	101.924	435317
200	732.404	2655.88	86.1538	125938		200	1927.73	2386	56.2986	249929		200	827.41	3019.54	73.3288	435128
201	1451.75	2046.8	75.0439	125887		201	798.851	2530.28	112.886	249796		201	1210.17	2714.32	35.372	435090
202	1761.39	2250.17	28.5625	125826		202	2022.59	2223.37	55.0723	249640		202	2038.86	382.97	91.0711	434450
203	843.733	2064.98	78.6977	125693		203	2185.29	2353.49	50.5263	249474		203	936.603	3054.28	67.9072	434323
204	1639.94	2468.4	46.5306	125591		204	1927.42	2402.1	49.4948	249209		204	676.29	3147.75	42.7306	434222
205	1272.16	2069.21	82.4634	125585		205	2323.28	1978.58	56.0485	248856		205	2503.31	349.954	104.677	433610
206	377.909	2278.25	87.5	125538		206	1659.57	2320.78	80.2168	248198		206	512.372	2845.99	40.2951	433433
207	1385.19	2344.02	79.5085	125485		207	2789.84	778.283	195.341	247927		207	1932.54	2722.76	34.8645	433412
208	1358.19	2226.51	32.5227	125469		208	2005.9	2300.62	44.4646	247534		208	2368.47	1282.71	83.0163	432770
209	566.367	2516.05	69.6333	125446		209	1941.06	2554.73	45.6699	247420		209	703.524	2800.77	55.6378	432617
210	1671.49	2600.52	65.6709	125280		210	936.977	2399.17	126.789	247079		210	765.116	3181.32	62.1032	432535
211	1283.35	2266.74	45.407	125262		211	1731.24	2461.57	51.2255	246877		211	478.568	2905.51	48.0616	432398
212	990.605	2166.72	57.5263	125145		212	1885.35	2276.86	65.983	246813		212	354.61	2893.17	51.1402	432315
213	554.127	2169.66	85.4608	125120		213	1851.68	2296.16	57.5537	246663		213	2152.61	427.838	91.5519	431994
214	681.379	2482.85	65.5057	124993		214	2334.44	2079.57	48.213	246314		214	635.297	2923.67	67.8791	431684
215	785.6	2279.81	107.459	124961		215	1599.01	2295.72	77.4434	246183		215	1477.03	2636.4	22.8561	431406
216	1590.53	2394.37	35.5714	124808		216	2217.87	1992.93	40.3473	246142		216	1350.79	2746.5	51.5133	431371
217	1289.18	2240.99	44.3731	124807		217	894.348	2224.83	170.671	245371		217	807.207	2940.64	54.3448	430825
218	965.711	2450.8	81.4889	124688		218	1984.14	2267.86	61.22	245340		218	2324.75	1289.69	95.7446	430642
219	646.973	2794.29	74.3067	124682		219	1801.96	2401.4	62.17	245238		219	880.618	2926.82	72.0737	430460
220	1242.85	2390.93	34.9836	124609		220	1843.8	2309.71	57.8582	245182		220	639.251	3067.31	45.5916	429840
221	637.672	2031.97	88.7031	124489		221	2199.96	2032.46	25.5556	244895		221	1640.89	2637.24	41.586	429765
222	1941.97	2757.8	72.1731	124474		222	2167.34	2327.28	48.4679	244316		222	2089.65	502.548	94.713	429542
223	1342	2374.81	33.5185	124448		223	1992.44	2412.06	49.9853	244188		223	2103.75	2708.96	40.3842	429320
224	1752.19	2328.9	32.5375	124434		224	1631.04	2300.89	78.7236	244104		224	2162.72	564.371	96.2335	429319
225	979.977	1992.83	109.517	124388		225	2213.12	2078.73	58.8731	243755		225	680.58	3170.83	71.7293	428958
226	962.806	2111.23	63.7097	124377		226	1845.7	2313.51	48.875	243091		226	2185.1	261	115.703	428131
227	415.544	2245.87	74.6176	124354		227	1757.75	2298.82	92.5103	242736		227	949.009	2941.5	56.2301	428112
228	1752.49	2298.86	31.6575	124327		228	2080.75	2302.71	82.873	242237		228	1418.77	2733.37	30.5436	427791
229	610.296	2113.09	99.4074	124230		229	2551.09	1081.29	215.942	242034		229	2054.98	2710.79	23.7724	427500
230	293.244	2553.74	74.6098	124041		230	1788.91	2516.89	51.5575	241743		230	2509.44	2467.87	62.0683	427454
231	318.724	2199.45	88.2328	123950		231	1997.01	2312.93	86.2981	241742		231	684.874	2735.2	61.3889	427025
232	367.129	2210.91	90.4353	123897		232	2261.35	2267.36	44.9709	241611		232	2182.91	288.914	122.796	426208
233	675.936	2232.87	78.5688	123737		233	1791.73	2437.61	66.2022	241502		233	825.257	3004	56.5389	426207
234	1854.89	2253.9	34.5802	123671		234	1845.88	2357.25	71.4234	241358		234	1209.76	2702.71	33.5128	426194
235	1259.14	2157.76	53.4571	123276		235	1678.8	2462.22	53.9583	241302		235	1834.55	2638.69	32.2947	425666
236	496.447	2621.89	81.5132	123252		236	1611.71	2407.85	82.4962	241179		236	659.481	3014.77	37	425636
237	855.072	1928.41	95.1532	123217		237	1748.11	2418.54	68.1263	240623		237	1419.5	2684.04	35.5756	425309
238	700.136	2408.98	104.424	123141		238	1882.28	2293.44	70.5093	240148		238	2487.66	2098.28	67.0256	425033
239	1366.31	2087.22	80.6	122999		239	2186.99	2309.37	50.1802	240092		239	2255.67	330.541	98.4634	424648
240	673.962	2048.12	109.846	122923		240	2121.68	2042.28	59.8252	240032		240	985.661	2929.67	39.744	424499
241	462.105	2695.5	81.5658	122739		241	2231.72	2281.75	58.0617	239797		241	2386.42	2812.15	36.4036	424359
242	520.904	2467.84	84.1442	122732		242	1875.49	2507.51	46.3178	238610		242	644.924	3020.38	60.1263	424275
243	842.159	2257	111.362	122649		243	1639.1	2281.48	76.5	238398		243	933.313	3058.89	42.9398	423968
244	451.174	2326.46	64.5507	122615		244	1886.28	2330.55	58.7642	238317		244	2121.91	447.633	78.6331	423862
245	365.553	2475.21	67.301	122477		245	1986.86	2277.66	68.2773	238116		245	781.744	2790.44	50.9925	423850
246	1223.84	2155.88	81.0508	122412		246	724.492	2574.91	111.661	238082		246	825.177	3127.02	74.8125	423758
247	1867.88	2274.7	36.879	122393		247	2298.2	2153.15	63.9796	237980		247	2152.61	496.451	75.5491	423006
248	1956.83	2322.89	42.8906	122358		248	2272.88	2220.68	45.9444	237843		248	2338.59	1775.63	55.2189	422756
249	1744.25	2400.26	38.7895	121948		249	2188.79	2405.19	37.5702	237823		249	2463.98	333.165	97.4396	422570
250	1708.1	2394.79	43.439	121797		250	1538.93	2351.49	67.6707	237765		250	2542.33	547.058	104.894	422370
251	653.832	2446.8	83.9789	121794		251	2057.43	2275.27	98.9387	237619		251	630.526	3063.29	34.2254	422197
252	1291.97	2424.02	58.7414	121700		252	2292.32	1982.62	48.7717	237514		252	1470.94	2673.76	27.0737	421987
253	829.098	1969.15	90.5738	121665		253	2330.91	2289.27	47.3864	237440		253	1539.64	2631.54	34.8797	421890
254	740.579	2361.77	112.632	121582		254	1823.01	2378.94	41.42	237354		254	571.856	2855.19	60.5805	421380
255	381.283	2347.53	104.067	121581		255	1873.66	2272.03	70.0066	237180		255	2239.2	2778.28	21.0256	421282
256	1291.12	2260.94	94.4875	121496		256	2128.19	2250.48	43.4867	237101		256	2271.75	1906.22	62.4845	420942
257	1231.66	2320.73	36.4318	121361		257	1956.3	2312.99	68.2466	237016		257	2383.22	2849.3	27.9901	420880
258	920.8	2365.52	63.5231	121282		258	1880.35	2452.33	40.3088	236805		258	2548.46	406.557	103.908	420083
259	1715.24	2353.15	32.3939	121233		259	1933.23	2363.12	45.3471	236765		259	506.186	2725.87	56.1071	419634
260	1152.96	2077.71	77.8091	121163		260	2157.37	2317.79	45.637	236554		260	889	3032.56	48.7245	419503
261	604.209	2018.15	118.462	121120		261	2243.34	2095.53	36.4679	236377		261	1825.86	2703.81	35.1056	419245
262	320.487	2155.79	107.382	120887		262	1555.66	2467.18	60.4046	236085		262	2202.2	583.717	88.0199	418844
263	2043.07	2350.24	49.2148	120879		263	2125.4	1999.94	43.7805	236027		263	2427.72	2744.74	22.854	418712
264	618.747	2951.04	84.3614	120828		264	2432.52	2296	51.963	235642		264	2518.22	490.292	114.092	418049
265	1306.99	2257.38	51.4634	120726		265	2208.24	1998.27	30.9806	235638		265	484.711	3227.04	65.0629	417847
266	716.143	2006.52	117.698	120598		266	1930.32	2463.01	56.3604	235507		266	2323.75	340.475	130.542	417302
267	424.788	2399.11	75.3173	120533		267	2187.82	2270.2	54.0833	235497		267	1432.82	2768.3	35.1586	417248
268	828.835	2088.24	74.8987	120512		268	1972.13	2368.34	50	234957		268	2119.4	2780.17	26.0373	416662
269	560.811	2395.57	87.8889	120474		269	857.403	2505.33	113.769	234815		269	2210.63	318.193	124.583	416413
270	468.376	2183.88	109.479	120460		270	1914.26	2258.87	61.9895	234593		270	405.494	3078.51	56.2146	416293
271	775.733	2572.97	92.4257	120455		271	1787.72	2353.61	72.5258	234200		271	2264.35	331.689	97.6477	415580
272	804.896	1964	90.6119	120407		272	1778.62	2331.14	82.947	234182		272	2289.66	288	104.611	415558
273	1644.95	2056.22	56.6271	120373		273	2113.88	2328.57	75.81	234133		273	1622.45	2751.39	33.984	415166
274	613.87	2168.49	79.8116	120366		274	2162.48	2258.74	49.8188	234083		274	2046.36	412.821	105.026	414615
275	323.331	2194.44	90.6186	120359		275	723.949	2219.89	133.208	233831		275	601.199	3137.42	63.3065	414431
276	857.039	2222.99	61.6579	120175		276	2168.33	2306.43	51.4526	233761		276	2128.61	328.52	122.897	414043
277	1265.42	2443.8	36.473	120096		277	2019.32	2352.54	50.3827	233668		277	2149.08	355.836	88.8362	413710
278	1107.72	2236.16	107.49	119997		278	2083.23	1602.1	98.8931	233621		278	2364.61	500.638	103.24	413708
279	503.409	2831.78	84.086	119910		279	1202.35	2365.82	95.6324	233619		279	2029.77	460.082	99.4041	413624
280	1692.86	2629.28	64.5114	119738		280	1661.46	2516.04	54.614	233453		280	1129.78	2888.31	53.4641	413343
281	1742.89	2327.12	40.512	119678		281	1808.25	2515.78	52.2586	233255		281	839.71	3190.59	54.7379	413337
282	738.466	2198.03	123.356	119643		282	1937.45	2319.63	50.687	233138		282	818.62	2755.27	72.5615	412784
283	416.987	2586.47	74.4872	119549		283	2245.84	2144.76	61.2549	233130		283	746.805	3024.96	33.0473	412682
284	1800.38	2292.51	28.4937	119523		284	1683.37	2480.39	59.3723	233055		284	2107.39	471.29	106.348	412561
285	500.169	2804.07	78.4699	119513		285	2208.38	2084.68	31.217	232878		285	2056.32	495.547	83.0876	412135
286	1865.53	2132.24	49.3301	119301		286	1824.29	2401.5	43.6018	232797		286	987.75	2823.78	56.4231	412030
287	1622.94	2201.56	26.4603	119263		287	1752.47	2270.39	74.8194	232573		287	2316.43	2789.85	32.9891	411088
288	674.065	2337.35	84.7778	119207		288	2145.07	2302.59	45.5638	232539		288	519.877	2818.78	66.648	411073
289	1855.4	2022.6	86.6418	119146		289	2148.41	2153.12	71.686	231887		289	2384.79	456.973	76.0068	410859
290	571.547	2719.45	99.2933	119119		290	1883.2	2319.86	88.8115	231840		290	2265.96	313.03	98.5952	410758
291	1937.89	2354.78	38.8921	119047		291	924.148	2321.28	139.652	231795		291	2308.84	804.054	104.368	410039
292	1333.87	2407.87	39.806	119019		292	2104.79	2345.34	27.7786	230956		292	944.245	2879.49	36.0645	409847
293	1089.14	2233.89	110.167	118981		293	1726.65	2563.11	51.4937	230934		293	788.574	3085.42	46.1026	409793
294	1892.19	2671.3	56.3492	118936		294	2199.55	2270.42	55.961	230855		294	451.935	2743.67	55.2836	409681
295	659.641	2336.79	84.1307	118897		295	2213.77	2384.92	35.825	230553		295	635.362	2962.26	35.1489	408832
296	1617.41	2527.88	44.4865	118790		296	1857.98	2345.24	90.2075	230537		296	1314.67	2601.07	47.6338	408780
297	1970.88	2191.31	35.1277	118787		297	1886.05	2309.59	70.5959	230485		297	544.861	2716.94	55.8133	408654
298	1615.72	2205.23	26.48	118687		298	1790.54	2302.04	54.0962	230322		298	2311.86	564.326	100.376	408398
299	1158	2172.31	84.5352	118566		299	933.251	2135.59	170.196	230310		299	2437.95	619.346	99.2521	407937
300	671.026	2365.42	102.632	118537		300	2006.87	2341.82	55.7895	230094		300	1131.87	2777.43	65.8981	407652
301	405.075	2288.72	66.5484	118330		301	1848.87	2330.99	51.8391	230051		301	660.639	2836.84	32.962	407616
302	745.873	2723.72	96.5211	118296		302	2336.42	2343.98	38.9381	229879		302	892.088	3037.58	39.9708	407263
303	490.793	2380.06	67.5	118218		303	2206.35	2168.47	26.9712	229757		303	413.257	2801.67	60.9029	407223
304	717.464	2758.29	85.5217	118208		304	677.048	2208.6	151.253	229658		304	960.681	2796.77	50.8824	407065
305	1736.13	2481.82	42.6167	118158		305	1709.02	2288.19	63.0593	229529		305	622.304	2985.4	38.5893	406852
306	1219.53	2208.74	52.6842	117999		306	1002.19	2537.21	94.8	229518		306	648.187	2772.85	55.065	406785
307	516.825	2392.51	67.7193	117888		307	2093.04	2415.34	44.0577	229281		307	2218.15	2892.99	26.0276	406505
308	796.736	2082.48	83.5283	117734		308	2294.66	2048.37	47.4512	229267		308	2062.75	2742.17	23.6755	406276
309	921.467	2018.82	65	117727		309	1953.89	2310.13	78.5798	229201		309	810.972	2953.44	40.1901	406222
310	344.265	2347.13	90.1029	117585		310	2197	1953.72	64.2283	229120		310	824.947	2938.34	68.3663	406110
311	395.03	2806.4	94.4356	117501		311	1960.24	2367.24	38.268	229116		311	2105.06	2859.09	22.5444	405996
312	1808.67	2174.96	51.25	117470		312	1814.29	2463.39	60.0412	229027		312	731.303	2953.75	34.4776	405799
313	791.411	2457.5	91.2	117453		313	2131.37	2390.75	47.1605	228981		313	2543.22	422.518	110.241	405678
314	1595.17	2742.13	66.5357	117396		314	1971.61	2300.25	56.2976	228832		314	2305.36	506.374	118.607	405584
315	1307.63	2450.08	39.2183	117386		315	2149.62	2427.82	41.48	228805		315	2091.51	395.394	89.6296	405463
316	1680.08	2110.33	30.9412	117293		316	2136.86	2288.06	91.7273	228704		316	906.013	3076.58	64.5886	405043
317	1871.48	2342.9	35.4384	117284		317	2191.1	2408.14	46.0808	228699		317	1261.25	2643.05	34.2692	404915
318	1506.61	2574.18	66.2807	117178		318	1937.28	2356.31	49.9907	228479		318	2435.53	2070	54.7327	404278
319	742.253	2178.89	73.8987	117171		319	2177.88	2053.26	24.4851	228394		319	479.815	2834.57	61.7022	404164
320	2183.02	2426.18	50.3152	117167		320	1977.97	2246.06	49.823	228209		320	1016.55	2932.04	75.9421	404049
321	1092.78	2416.27	63.621	117123		321	2253.48	2096.38	81.5868	228036		321	993.188	2997.55	62.1883	403809
322	1594.63	2542.69	53.2692	117085		322	1747.27	2289.67	54.1176	227992		322	517.389	2790.88	66.1632	403509
323	432.779	2738.06	74.6618	117041		323	1914.03	2292.79	45.5079	227894		323	1996.6	440.088	110.079	403425
324	1668.98	2238.42	29.3077	116891		324	1740.88	2272.03	79.466	227798		324	2269.5	481.693	116.434	403126
325	793.233	1986.57	88.4556	116852		325	2402.19	2121.68	39.4118	227764		325	578.55	2757.56	40.6291	403095
326	1699.5	2575.19	45.6143	116734		326	1126.26	2481.02	88.5455	227712		326	796.366	3002.18	61.8557	402623
327	502.243	2754.05	101.838	116709		327	2161.89	2025.07	55.7857	227309		327	2475.75	465.537	116.823	402610
328	817.591	1964.47	98.8977	116635		328	2241.56	1866.14	46.9907	227220		328	736.982	3134.66	39.9634	402373
329	861.417	2136.68	75.4881	116571		329	2200.21	2305.72	46.4483	227178		329	646.28	3096.15	40.7202	402362
330	589.71	2959.56	94.5645	116463		330	2094.88	2381.17	71.67	227065		330	873.65	3083.11	57.0395	402357
331	1769.15	2174.83	65.6111	116425		331	1800.96	2347.23	97.922	227063		331	578.143	2701.36	53.754	402288
332	582.231	2440.05	103.22	116273		332	2322.95	2420.8	44.89	226738		332	2142	448.307	105.087	402220
333	362.573	2363.55	79.0909	116189		333	1953.38	2301.21	39.2907	226530		333	872.033	2759.85	63	401880
334	1131.31	2129.96	51.0714	116065		334	2189.3	2077.5	42.4954	226512		334	470.69	2854.34	55.962	401808
335	1277.57	2293.51	49.4714	115870		335	2309.34	2005.17	49.2674	226345		335	605.162	2794.61	57.5074	401710
336	1245.5	2261.88	34.2812	115834		336	1707.47	2272.83	74.0599	226092		336	1314.57	2740.25	37.0774	401610
337	408.25	2166.05	100.5	115750		337	2071.96	2318.2	53.6512	225824		337	620.115	3173.74	56.0504	401245
338	655.032	2220.93	75.2419	115734		338	1990.81	2419.3	51.7542	225715		338	2267.65	341.412	92.2	401139
339	510.464	2644.74	62.6087	115572		339	2176.87	1973.92	63.0833	225577		339	649.659	2959.88	71.8462	400495
340	1919.42	2102.89	34.6966	115547		340	1909.39	2389.92	87.993	225373		340	2095.09	333.2	101.841	400315
341	472.217	2265.94	105.157	115428		341	2374.87	2066.26	44.8049	225279		341	2367.15	406.01	84.1487	400299
342	456.515	2311.55	78.5248	115392		342	1869.13	2346.71	61.3653	225122		342	2123.46	374.759	118.078	400118
343	707.03	2132.73	96.6269	115369		343	684.088	2260.97	147.199	225112		343	2506.13	2708.76	29.9213	400085
344	340.802	2292.63	86.1287	115304		344	2229.22	2426.83	59.438	224977		344	875.703	2844.8	72.5086	399995
345	1124.11	2257.39	51.4583	115216		345	1728.19	2316.52	64.913	224887		345	584.726	2972.55	42.8929	399810
346	1170.29	2428.08	67.4048	115103		346	1864.97	2594.55	40.1441	224880		346	2116.91	356.312	88.5035	399736
347	514.301	2684.91	86.5699	115057		347	1811.51	2340.77	67.5195	224877		347	623.848	2985.72	41.7515	399732
348	321.289	2464.1	97.012	115025		348	624.466	2633.34	101.514	224765		348	1720.12	2710.93	34.9341	399726
349	570.306	2262.04	83.0471	115020		349	1852.96	2321.11	51.4309	224535		349	591.234	3084.89	46.0971	399653
350	833.188	2323.45	61.7391	114932		350	2236.05	2430.25	45.2667	224488		350	2246.28	328.545	90.0192	399576
351	531.878	2394.62	78.5	114677		351	1772.76	2342.54	48.2521	224417		351	501.388	3137.97	62.3878	399488
352	1366.12	2402.83	32.9884	114598		352	1765.18	2299.86	48.9595	224284		352	2508.02	2800.16	31.6593	399430
353	1753.77	2247.06	40.6444	114586		353	1920.56	2480.15	40.4747	224118		353	594.267	3152.78	66.9333	399007
354	1692.95	2117.64	24.7627	114585		354	2356.44	2030.23	51.4205	224086		354	2339.05	2894.7	37.5347	398926
355	749	2391.57	61.5155	114478		355	1764.81	2347.62	71.6439	223916		355	2119.89	457.67	96.8085	398752
356	1307.59	2118.36	56.411	114434		356	1858.82	2297.05	58.6842	223887		356	2418.47	576.257	110.825	398709
357	515.943	2938.47	84.4143	114407		357	1774.47	2356.81	45.8991	223860		357	2290.28	2105.02	57.4428	398671
358	1031.03	1971.86	71.5632	114397		358	2268.47	2097.71	44.4868	223440		358	2140.72	499.234	102.726	398668
359	658.362	2685	78.9783	114363		359	1848.57	2267.88	54.2159	223430		359	679.552	2821.1	38.7388	398656
360	786.351	2460.88	74.4189	114363		360	2196.57	2434.05	51.3023	223371		360	2331.24	2720.18	28.8289	398473
361	708.417	2362.54	104.312	114292		361	2393.83	2239.52	47.7128	223255		361	678.887	2861.87	40.0282	398450
362	1947.63	2365.01	46.28	114284		362	2262.16	1954.66	66.136	223158		362	864.509	3082.53	67.8204	398234
363	448.065	2680.08	69.5652	114193		363	2034.21	2314.14	52.9718	223027		363	2516.31	2779.04	39.3379	398183
364	1715.76	2053.51	70.4819	114152		364	1708.1	2373.36	83.6292	223022		364	765.164	3101.08	34.2579	397873
365	517.561	2303.56	76.8421	114125		365	1157.81	2244.06	149.63	222677		365	1252.14	2730.74	25.0376	397817
366	1555.11	2211.59	62.6071	114113		366	2059.46	2398.92	49.9478	222550		366	2298.98	421.413	91.4127	397780
367	1628.74	2185.18	34.5714	113962		367	1910.87	2306.11	60.1617	222536		367	646.965	3206.99	67.7525	397699
368	301.154	2370.51	84.4846	113934		368	2080.93	2264.1	66.3585	222501		368	912.987	3019.79	38.8165	397680
369	1819.32	2206.93	61.4828	113881		369	1926.29	2337.16	79.5517	222409		369	2173.06	312.965	99.0294	397487
370	1253.39	2376.21	37.4478	113767		370	2269.4	2420.22	56.061	222388		370	582.905	2815.16	71.7354	396649
371	804.252	2237.33	107.176	113739		371	2228.86	2012.54	67.7143	222307		371	1083.38	2915.47	50.9401	396390
372	623.596	2842.19	83.3034	113736		372	2218.66	2388.65	72.9505	222292		372	2431.23	2512.1	68.0584	396143
373	448.929	2613.69	70.9429	113603		373	1766.9	2333.31	49.7093	222272		373	1809.02	2713.09	20.0551	396040
374	428.533	2730.67	96.3733	113477		374	478.08	2545.51	123.32	222232		374	901.887	3028.12	44.9677	395931
375	517.812	2769.73	102.125	113432		375	2307.94	2132.45	53.8182	222144		375	2516.27	393.855	93.5047	395796
376	1260.68	2309.52	40.4592	113216		376	2020.06	2265.24	61.3855	222118		376	812.78	3205.04	62.64	395766
377	1269.73	2209.05	42.5366	113210		377	979.231	2311.62	112.692	222063		377	2138.73	319.892	117.643	395734
378	1221.17	2061.27	45.5	113136		378	2201.62	2382.8	71.1062	221797		378	635.191	3163.07	40.7863	395671
379	489.133	2475.07	82.9778	113132		379	1774.18	2291.11	58.4466	221583		379	2419.66	421.065	88.9405	395445
380	990.196	2422.36	86.6304	113067		380	2123.74	2300	95.05	221560		380	663.014	2761.05	63.2793	395346
381	1391.57	2554.58	62.5522	113065		381	1739.52	2298.48	67.7191	221438		381	2129.07	417.044	87.8188	395039
382	1879.53	2262.52	34.8621	113003		382	2090.69	2306.62	81.4068	221255		382	2218.24	2821.91	23.8971	394958
383	566.8	2980.76	90.3556	112975		383	1877.25	2246.91	61.1845	221250		383	1523.49	2581.74	33.0802	394801
384	859.068	2512.61	72.9545	112769		384	1964.34	2556.89	44.9124	221169		384	1108.64	2769.9	62.6029	394579
385	730.307	2305.56	103.533	112736		385	1865.72	2278.08	51.4884	221069		385	856.653	3095.91	71.2593	394378
386	1535.53	2414.84	46.9123	112725		386	2075.97	2317.13	41.8739	221055		386	2288.23	2878.54	26.6242	394300
387	485.445	2559.55	102.327	112705		387	2067.06	2352.28	65.6818	220975		387	2335.35	1466.11	83.0674	394218
388	1204.56	2258.51	51.2564	112700		388	1122.16	2222.34	119.659	220683		388	676.919	2843.56	39.9195	394159
389	549.991	2864.55	82.5234	112627		389	1950.17	2355.6	58.6116	220435		389	904.436	2880	71.9103	394076
390	1368.35	2249.54	33.5688	112588		390	1967.54	2387.38	64.6092	220302		390	753.838	2905.56	35.8784	393770
391	1688.17	2290.32	26.5714	112486		391	584.57	2448.55	135.095	219806		391	1637.2	2734.01	28.634	393469
392	401.082	2582.34	74.8455	112461		392	2378.91	2122.67	51.7327	219805		392	715.867	2975.08	71.6389	393433
393	906.177	2103.41	73.4937	112444		393	1978.02	2252.21	52.0106	219764		393	2265.93	379.196	97.9345	392986
394	726.038	2081.19	81.4875	112432		394	2241.51	2093.04	49.6055	219730		394	2533.89	455.382	96.8667	392951
395	1973.17	2205.51	44.9405	112419		395	1992.11	2292.53	55.4526	219592		395	616.468	3184.61	56.1139	392901
396	426.082	2321.05	100.344	112365		396	1565.56	2362.85	85.0594	219362		396	1125.22	2750.79	49.5351	392838
397	708.76	2270.52	72.5333	112357		397	1921.3	2436.62	82.3047	219347		397	686.37	2845.68	72.7884	392609
398	351.639	2610.43	77.5833	112295		398	1620.01	2307.55	87.6277	219344		398	2512.75	2711.93	61.6725	392576
399	493.411	2470.41	81.2055	112269		399	1668.23	2477.31	50.2553	219312		399	2437.43	2833.89	28.8012	392560
400	582.011	2585.26	90.3103	112204		400	978.241	2496.84	110.015	219113		400	759.323	2900.17	67.8452	392544
401	1821.71	2625.84	50.6988	112187		401	2123.26	2036.23	64.5426	219072		401	740.939	2909.98	71.8364	392274
402	466.8	2461.46	57.5538	112092		402	2016.29	2311.8	55.4444	219067		402	839.801	3010.27	62.247	392222
403	423.806	2453.11	90.2755	111933		403	2221.65	2333.97	57.0385	219013		403	544.458	2808.22	57.4967	392218
404	694.655	2365.71	65.8276	111931		404	1989.36	2285.11	49.4148	218927		404	641.869	2828.45	66.1202	392086
405	1101.84	2129.35	69.475	111877		405	1937.86	2292.21	70.6204	218923		405	2467.45	2825.63	27.9419	391980
406	1944.21	2624.74	62.3646	111810		406	494.683	2522.6	135.056	218782		406	1981.37	2755.43	18.3931	391744
407	2209.45	2578.19	63.6078	111806		407	2410.37	2105.93	48.9478	218738		407	2099.8	417.435	91.0417	391630
408	1295.01	2213.94	45.9286	111743		408	1788.58	2373.33	62.3469	218655		408	1742.52	2695.13	31.8511	391614
409	293.743	2627.01	74.6571	111699		409	2168.72	2057.81	52.6087	218652		409	2144.66	465.739	107.109	391137
410	762.161	2195.02	83.6897	111699		410	1830.95	2402.24	64.8454	218428		410	548.475	2691.16	58.5127	391073
411	455.585	2210.63	86.7458	111695		411	2138.56	2314.21	40.8375	218305		411	2401.66	459.664	99.7558	391050
412	1566.13	2385.2	45.0222	111689		412	2001.18	2485.74	41.5269	217911		412	352.111	2841.36	55.2263	390978
413	1964.61	2303.93	45.5278	111579		413	1741.73	2374.03	60.99	217821		413	763.925	3087.9	46.2298	390815
414	1283.43	2220.63	46.8361	111376		414	1796.5	2510.71	54.3786	217800		414	694.614	3265.75	62.6772	390181
415	850.514	2143.29	103.639	111320		415	1674.36	2444.89	55.6105	217754		415	718.251	3165.71	68.8744	389677
416	922.422	2113.97	64.9688	111294		416	1750.1	2503.9	49.3985	217714		416	1288.67	2701.32	44.6948	389551
417	534.971	2833.73	94.5429	111149		417	1986.34	2347.18	65.9832	217526		417	2054.56	512.731	103.275	389434
418	1565.69	2177.57	49.2261	111138		418	1973.22	2296.46	71.0707	217523		418	2427.77	329.872	115.511	389222
419	575.486	2236.54	123.181	111028		419	2307.41	2027.34	79.3826	217477		419	834.246	2794.72	39.7897	388917
420	457.861	2690.14	94.4861	111022		420	2342.68	2059.04	68.3086	217317		420	680.894	2931.9	35.3577	388830
421	902.228	2155.48	100.623	111022		421	2288.87	2105.69	22.4609	217178		421	2211.81	257.27	105.241	388815
422	490.383	2580.38	52.3	111019		422	2145.87	2261.8	54.5143	217095		422	2302.59	2719.92	44.2028	388669
423	706.76	1997.8	101.531	110973		423	1874.07	2447.27	57.4494	216882		423	897.91	3068.68	73.0968	388364
424	605.041	2313.32	89.3514	110893		424	2375	2217.09	43.8617	216873		424	772.238	3130.47	67.5238	388347
425	978.282	2225.01	62.9647	110842		425	2129.3	2344.25	79.2907	216674		425	887.797	3068.95	38.5817	388299
426	1848.69	2400.31	45.3692	110830		426	1130.1	2400.44	120.132	216414		426	535.378	2740.83	61.3077	388294
427	428.632	2198.14	86.5921	110800		427	864.69	2301.28	158.396	216408		427	2456.62	2823.15	44.9815	388137
428	1886.21	2473.76	46.5067	110507		428	1242.94	2333.83	95.5789	216225		428	1280.83	2693.45	56.0822	388115
429	675.286	2182.61	68.9796	110406		429	2324.82	2257.24	52.369	216049		429	2429.82	1033.96	88.4706	388088
430	1892.11	2437.16	41.3765	110359		430	1909.99	2439.51	61.0377	215823		430	865.424	2837.68	62.0432	388030
431	414.211	2204.25	86.5775	110326		431	777.831	2482.56	139.559	215582		431	2345.66	415	121.995	387856
432	266.86	2252.35	99.0374	110325		432	2206.61	2241.23	52.4434	215531		432	2208.59	478.182	82.5249	387525
433	638.068	2549.07	75.5342	110258		433	2224.1	2337.79	49.0755	215503		433	2334.65	2626	38.9091	387367
434	567.238	2654	83.4603	110201		434	2111.16	2096.82	73.1008	215474		434	1213.34	2791.55	44.9424	387144
435	528.13	2542.78	54.3117	110173		435	2058.3	2256.67	71.6744	215424		435	437.264	2892.94	54.3786	386941
436	1743.95	2142.21	26.5205	110172		436	1510.52	2499.37	60.9913	215384		436	675.887	3168.05	62.4667	386879
437	420.974	2254.28	106.267	110143		437	2216.63	2467.11	48.1975	214926		437	778.956	3175.22	46.8077	386859
438	1298.77	2491.14	79.4675	110098		438	2213.2	2415.56	44.9556	214909		438	1684.62	2746.3	32.1765	386839
439	1218.4	2176.09	88.4639	109832		439	2152.96	2347.82	60.29	214789		439	702.124	2823.66	60.9005	386816
440	1185.53	2235.13	53.6324	109825		440	2233.12	1497.55	105.765	214747		440	2186.54	653.683	88.0599	386784
441	1681.74	2093.49	28.3452	109621		441	685.135	2178.99	144.525	214695		441	775.051	2756.42	54.1825	386725
442	462.435	2955.45	85.2903	109617		442	1927.68	2394.34	52.8417	214627		442	2324.6	2924.11	31.1257	386670
443	1062.27	2118.59	53.0938	109569		443	536.165	2554.04	115.702	214405		443	1523.62	2701.78	35.5363	386504
444	307.449	2207.92	88.4393	109427		444	1727.27	2348.3	67.3048	214399		444	2225.73	425.109	94.3437	386136
445	990.141	2069.38	99.7949	109371		445	1982.11	2288.19	64.6	214132		445	2084.64	2638.44	25.084	386098
446	413.396	2468.78	113.625	109353		446	1946.5	2400.04	56.0917	213748		446	613.669	2785.23	62.1689	386022
447	994.571	1987.76	87.5	109334		447	2250.9	1952.14	71.0504	213708		447	1986.34	2651.86	29.1839	385794
448	536.188	2778.23	80.4058	109307		448	1936.83	2328.81	56.0297	213631		448	1691.06	2644.93	36.6158	385454
449	1408.83	2222.99	39.9149	109280		449	2534.64	994.906	201.453	213503		449	595.261	3181.65	50.2236	385204
450	1734.29	2254.62	50.5732	109206		450	1943.14	2362.48	88.2109	213427		450	784.114	2870.08	71.7429	385185
451	547.781	2867.16	92.5938	109180		451	1931.9	2481.57	55.425	213355		451	889.036	3134.9	51.1325	385181
452	1273.77	2188.96	56.6709	109116		452	1840.15	2342.06	56.9897	213350		452	1279.66	2770.92	34.7471	385181
453	842.944	2327.18	66.4778	109065		453	2197.45	2281.13	56.3165	213309		453	1252.84	2796.05	39.5964	385018
454	580.577	2118.99	84.6479	108969		454	1906.76	2358.71	50.2444	213225		454	1565.44	2677.89	28.3624	384931
455	1252.97	2127.9	83.8542	108867		455	2145.64	1983.03	57.4878	213185		455	2374.81	404.657	121.127	384696
456	1055.98	2111.96	52.2976	108779		456	2233.72	2289.67	48.84	213119		456	2542.85	2485.36	72.4526	384658
457	594.617	2649.81	74.35	108755		457	2084.24	2291.04	45.2627	212725		457	706.902	3065.78	31.0488	384649
458	1137.97	2031.62	96.6	108684		458	1800.4	2395.95	63.7471	212700		458	2480.06	322.254	97.0794	384557
459	1286.71	2254.51	65.4868	108623		459	2167.55	2341.82	53.7396	212675		459	708.124	3180.35	62.2418	384418
460	1091.94	2321.17	88.5507	108607		460	1828.8	2449.33	51.145	212498		460	2397.03	2844.63	27.1486	384310
461	676.611	2199.24	90.3611	108577		461	1893.49	2269.96	49.4	212382		461	2334.7	363.293	94.311	384025
462	2464.74	2223.76	78.3625	108551		462	1762.85	2261.61	83.208	212212		462	1474.1	2555.59	29	383927
463	652.87	2826.63	85.2174	108539		463	1929.75	2371.19	50.8091	212207		463	2255.62	522.885	88.694	383801
464	961.65	2080.93	93.4125	108476		464	1732	2281.35	76.8841	212159		464	2104.39	449.645	115.235	383685
465	518.868	2809.93	98.3382	108346		465	1906.49	2427.29	81.7685	212111		465	643.065	3118.47	44.1558	383675
466	706.774	2222	73.9247	108310		466	2164.25	1983.92	73.2329	211975		466	1719.74	2617.72	36.1571	383630
467	1052.39	2208.11	100.563	108097		467	2150.57	2279.73	45.4466	211923		467	1656.63	2675.6	20.4497	383205
468	598.768	2374.62	76	108083		468	1790.03	2331.9	56.1405	211774		468	1586.52	2585.46	31.9773	383092
469	888.554	2027.14	97.7538	107912		469	979.222	2355.77	125.051	211723		469	2549.76	459.141	93.0534	383055
470	625.059	2463.19	96.5441	107829		470	1708.53	2388.64	51.4906	211718		470	2314.14	2707.02	31.4867	382940
471	1096.98	2211.61	97.6393	107783		471	732.594	2374.14	120.361	211532		471	877.625	3087.66	66.1375	382714
472	1079.47	2200.16	57.1124	107781		472	905.518	2422.61	117.433	211503		472	2343.81	1359.17	77.6071	382700
473	1871.52	2206.29	36.1977	107689		473	2170.75	1994.6	35.8818	211497		473	1032.91	2862.35	61.1429	382657
474	471	2480.76	53.6129	107682		474	2254.03	1969.25	61.9576	211155		474	587.381	3035.21	39.5149	382594
475	1201.8	2232.74	51.3	107596		475	1800.9	2241.61	67.1348	211138		475	2280.56	520.551	84.2222	382415
476	662.422	2016.06	103.567	107582		476	1601.42	2320.89	87.0755	210921		476	580.737	3040.31	41.1022	382332
477	983.323	2056.23	70.1129	107388		477	1723.74	2399.26	63.8519	210847		477	634.298	3051.43	55.9821	382191
478	762.886	2182.56	85.2429	107343		478	869.905	2273.38	150.917	210795		478	832.288	3139.5	44.0137	382049
479	426.778	2574.61	60.963	107286		479	2030.51	2218.67	55.439	210643		479	2064.13	425.692	109.919	381804
480	558.729	2114.88	129.518	107277		480	2014.38	2283.35	71.0625	210353		480	2081.75	377.969	115.253	381565
481	529.725	2163.05	87.4625	107273		481	1034.6	2197.09	141.277	210245		481	2229.81	448.214	107.042	381556
482	956.861	2010.18	98.519	107260		482	1238.12	2314.85	94.1328	210072		482	1286.42	2681.13	34	381555
483	410.744	2324.03	63.5256	107247		483	2018.6	2341.46	70.8	209956		483	2315.44	419.411	83.0443	381454
484	1138.97	2087.53	53.4242	107219		484	2143.86	2196.2	63.4731	209952		484	904.257	3097.4	68.1148	381356
485	1819.48	2316.55	46.4773	107208		485	1875.87	2456.11	61.0438	209912		485	2435.83	1689.63	56.9417	381334
486	732.62	2080.2	82.86	107201		486	1985.98	2259.58	48.4607	209912		486	682.52	2796.47	50.3133	381217
487	503.171	2170.11	116.463	107138		487	1883.74	2424.37	94.3864	209875		487	2026.64	467.617	108.831	381123
488	1298.18	2134.34	38.5889	107113		488	2124.03	1745.19	81.0984	209714		488	465.971	2795.4	56.8417	380935
489	1362.33	2429.87	55.6911	107102		489	2187.44	1948.63	33.8962	209708		489	717.743	3226.74	66.5988	380609
490	1035.92	1936.73	91.2105	107030		490	2006.87	2253.56	60.4945	209654		490	1751.93	2736.54	29.5243	380421
491	521.696	2277.2	69.4557	107003		491	2146.33	2411	47.785	209461		491	1381.56	2685.32	19.8345	380268
492	1099.66	2077.41	98.475	106898		492	773.214	2148.99	169.395	209387		492	2485.36	438.462	103.815	380210
493	519.328	2629.05	57.5781	106895		493	2125.04	2255.09	48.575	209197		493	2475.44	402.556	114.796	380161
494	1946.56	2609.92	59.4842	106873		494	1705.27	2421.91	66.439	209193		494	2208.13	508.184	95.6211	380127
495	423.284	2345.96	92.4954	106831		495	1771.12	2350.1	48.5159	209136		495	539.569	2941.14	50.6923	380072
496	751.269	2217.82	71.086	106738		496	740.813	2372.66	135.38	209018		496	692.06	3196.31	65.4552	380021
497	405.394	2201.3	86.3182	106612		497	1800.69	2518.93	51.459	208917		497	2233.44	577.701	91.8152	379896
498	382.626	2174.22	96.2424	106562		498	2139.61	2295.59	68.5122	208900		498	483.825	2792.12	66.3557	379836
499	741.943	2221.23	116.071	106501		499	1864.99	2410.04	50.9239	208753		499	544.221	2958.69	57.6933	379232
500	1862.6	2251.68	33.7671	106463		500	1073.87	2353.95	110.517	208708		500	2122.16	2713.92	41.0461	379148
501	827.981	2192.93	108.944	106378		501	1857.21	2434.03	58.0612	208623		501	2028.45	2655.52	29.1838	378990
502	1700.53	2541.5	40.6029	106363		502	2241.74	2073.5	42.4756	208578		502	1455.05	2673.66	46.5082	378968
503	615.23	2649.67	74.8033	106342		503	1153.09	2507.89	83.1667	208497		503	1530.2	2735.99	28.7059	378638
504	1695.91	2191.29	23.5263	106292		504	583.745	2495.31	110.484	208475		504	2345.75	283.629	114.094	378628
505	2144.88	2171.34	39.6552	106242		505	1612.98	2381.71	75.5038	208333		505	534.4	2815.43	39.681	378188
506	1125	2399.63	70.6071	106238		506	2100.91	2276.7	72.6559	208113		506	2461.29	298.779	110.736	378157
507	528.875	2632.43	79.5875	106210		507	1612.89	2428.79	49.0882	208085		507	2351.41	493.388	99.343	377772
508	929.869	2102.74	66.5738	106192		508	1650.96	2515.82	55.0774	207891		508	1149.36	2742.4	53.3735	377572
509	1516.73	2590.05	67.4237	106154		509	1933.11	2323.01	86.0154	207848		509	873.273	3150.27	60.0661	377388
510	923.719	2169.48	57.6094	106121		510	2255.11	2004.94	53.0105	207779		510	567.709	3309.88	66.6592	377290
511	1853.06	2199.47	39.5974	106117		511	1916.65	2420.3	57.8083	207704		511	1549.53	2719.95	37.0714	377189
512	1960.42	2612.55	57.9245	106057		512	1736.28	2408.44	86.1544	207681		512	552.866	2871.2	34.2441	376698
513	1684.97	2390.3	52.6339	106044		513	1630.26	2354.77	80.1	207631		513	1193.76	2672.7	41.1645	376644
514	1226.73	2527.51	78.5195	106032		514	1017.29	2292.32	160.558	207337		514	1679.28	2559.81	38.4317	376632
515	765.338	2221.38	114.465	106005		515	2168.91	1981.31	62.2706	206999		515	2144.91	2688.39	25.3879	376619
516	635.689	2526.41	90.7297	105904		516	990.792	2516.48	85.0649	206895		516	2236.66	399.52	98.5132	376548
517	633.75	2426.29	65.4412	105889		517	2109.35	2291.99	45.6809	206853		517	495.006	3122	47.2469	376480
518	593.914	2133.27	103.471	105827		518	571.213	2348.51	141.801	206803		518	1508.01	2656.52	18.8676	376423
519	2002.5	2116.93	47.2414	105758		519	1617.64	2469.33	54.8542	206765		519	708.856	3293.67	72.6383	376350
520	1351.42	2195.12	43.3636	105756		520	673.274	2139.67	147.654	206748		520	501.661	2876.03	48.954	376298
521	734.221	2158.04	102.519	105680		521	2302.24	2236.44	48.7679	206673		521	654.402	2905.34	62.288	376274
522	1314.61	2060.11	38.1845	105658		522	1593.38	2376.93	81.4464	206626		522	485.957	2829.69	60.2733	376061
523	611.083	2146.92	123.35	105641		523	2079.69	2233.73	45.5204	206489		523	2131.94	331.945	92.4414	375964
524	951.275	1987.3	115.537	105572		524	1854.59	2414.02	45.4773	206486		524	501.631	2793.78	50.75	375907
525	647.482	2462.92	98.5663	105529		525	1749.5	2388.21	59.6204	206427		525	2127.8	523.649	94.7837	375471
526	444.949	2719.71	72.3797	105526		526	1938.21	2336.22	82.6761	206389		526	516.444	2911.18	53.0473	375459
527	813.737	2133.47	69.5051	105524		527	1060.07	2484.56	94.5507	206351		527	1752.39	2642.53	22.527	375336
528	1594.44	2596.78	53.3091	105507		528	1975.42	2278.03	46.2584	206305		528	1768.01	2686.26	24.4299	375270
529	521.724	2657.86	82.5789	105493		529	2259.42	2472.03	50.3394	206199		529	524.374	2776.02	45.0272	375267
530	666.784	2038.27	110.432	105485		530	1125.66	2093.99	130.638	206169		530	653.988	2914.96	38.6627	374869
531	515.622	2486.63	86.2561	105341		531	2304.13	2094.39	52.1739	206166		531	763.92	3099.6	47.6477	374826
532	1188.4	2104.56	81.5584	105338		532	2088.47	2397.02	87.9805	206016		532	1320.64	2646.98	30.1592	374606
533	459.1	2840.9	79.4429	105310		533	1746.18	2378.77	63.9135	205994		533	2340.87	364.825	89.1421	374386
534	1626.78	2388.49	27.759	105209		534	2251.43	2409.23	60.4815	205976		534	2375.51	1029.43	98.995	374378
535	1199.42	2135.25	68.4057	105205		535	1666.84	2438.49	54.7734	205956		535	2063.65	507.188	87.812	374352
536	1371.54	2422.65	54.59	105188		536	2351.07	2113.81	45.1386	205884		536	2086.6	409.766	83.4026	374159
537	1545.07	2479.32	70.3733	105157		537	1866.77	2279.33	61.033	205772		537	527.121	3165.52	65.1277	374067
538	671.903	2190.18	69.3065	105138		538	2242.87	2093.76	82.1092	205418		538	532.388	3275.34	64.1053	373934
539	456.848	2906.14	99.481	105122		539	1265.99	2330.53	96.6387	205398		539	624.793	3166.74	51.0435	373828
540	430.604	2262.95	74.5938	105044		540	2117.43	2338.04	48.629	205371		540	2232.13	530.305	80.9634	373803
541	680.369	2385	96.5846	104937		541	2116.54	1983.95	34.3143	205265		541	840.194	2887.14	71.9312	373653
542	1323.86	2323.69	36.6747	104897		542	2201.15	2434.44	53.7545	205255		542	1387.43	2677.92	33.6774	373603
543	1554.54	2700.82	64.623	104890		543	1663.04	2415.22	63.0312	205247		543	2481.36	2685.97	27.7328	373581
544	1379.33	2400.56	60.4393	104828		544	2195.64	1881.32	47.3368	205235		544	1338.82	2769.18	41.3113	373200
545	593.114	2182.5	78.4286	104809		545	2065.25	2401.34	51.386	205043		545	2342.57	1182.8	75.2252	373137
546	1698.96	2156.68	30.6104	104752		546	2002.27	2407.62	49.0093	204964		546	2429.76	1526.15	66.8895	373137
547	854.508	2212.87	109.164	104731		547	2304.38	2050.4	28.8279	204868		547	2161.99	589.418	90.7733	373075
548	835.942	2159.99	84.3913	104716		548	2047.53	2201.7	57.169	204841		548	668.935	2869.86	74.0774	372899
549	1178.52	2107.62	80.4074	104614		549	1991.5	2439.53	38.6219	204841		549	2361.12	407.081	85.1676	372835
550	621.023	2023.11	96.2045	104605		550	866.965	2330.8	163.721	204792		550	914.567	3048.85	72.1228	372698
551	618.883	2224.45	99.6833	104550		551	2157.97	2289.23	48.9381	204791		551	652.257	3032.29	65.5029	372589
552	474.115	2481.12	93.0154	104542		552	1614.6	2319.61	77.1765	204570		552	2351.95	339.439	116.39	372580
553	628.976	2312.72	77.5294	104416		553	632.111	2513	133.023	204350		553	2213.37	454.174	97.8315	372543
554	614.469	2735.08	70	104412		554	1251.16	2308.25	96.3922	204314		554	2076.41	2735.79	29.9602	372481
555	1877.11	2272.04	36.8298	104336		555	706.225	2191.57	147.894	204310		555	1249.15	2810.91	50.9194	372450
556	322.598	2626.06	75.2989	104330		556	2054.62	2273.27	65.0722	204189		556	1060.14	2910.22	60.7279	372198
557	1297.67	2445.77	61.908	104297		557	2310.46	2206.32	51.6839	203999		557	1497.72	2520.23	37.3139	371818
558	615.767	2055.59	88.6027	104296		558	1868.79	2295.96	75.8034	203996		558	808.609	2971.05	38.245	371813
559	988.978	2092.57	76.8791	104231		559	2218.35	2072.22	85.8824	203986		559	1279.91	2676.45	38.2822	371757
560	569.022	2225.27	115.483	104222		560	2042.24	2258.46	51.5833	203957		560	795.427	2876.45	57.3846	371727
561	2006.42	2400.06	38.9861	104197		561	2157.28	2043.35	33.9759	203891		561	2323.62	424.531	119.296	371656
562	931.679	2151.32	59.1132	104184		562	2204.12	2002.15	51.949	203886		562	893.313	2939.79	61.4933	371612
563	711	2631.14	91.5	104176		563	1881.12	2450.51	59.9426	203796		563	2043.77	496.819	90.9653	371608
564	371	2501.66	100.489	104137		564	2266.09	2094.31	40.1264	203766		564	2220.75	2717.84	27.9091	371602
565	981.392	2069.07	79.3784	104122		565	2340.96	2082.95	45.561	203739		565	2445.67	2574.84	59.8042	371578
566	800.377	1975.03	89.942	104111		566	2136.79	2316.97	45.7583	203570		566	2188.35	577.68	99.0203	371499
567	1300.94	2309.41	36.1818	104106		567	2642.02	944.494	187.028	203564		567	584.584	2985.88	34.3758	371442
568	1199.03	2256.66	104.563	104094		568	1821.68	2427.79	59.0326	203430		568	1648	2713.38	34.4203	371416
569	576.75	2489.6	63.5735	104080		569	1909.58	2263.95	63.8409	203430		569	2384.97	281.554	123.431	371139
570	720.545	2342.61	79.0227	104044		570	624.366	2443.51	107.481	203239		570	1899.51	2686.83	30.6053	371046
571	1753.3	2336.59	39.6066	104021		571	2215.16	1703.3	88.4229	203237		571	2308.34	439.861	123.133	371020
572	421.687	2173.5	99.9116	104017		572	2052.39	2418.33	81.8644	203229		572	586.896	2754.18	62.6358	370962
573	1208.73	2277.71	50.6143	103989		573	2238.74	2299.13	43.5195	203227		573	523.484	3139.32	51.0556	370874
574	1940.13	2388.24	44.5429	103904		574	2322.45	2127.05	49.4156	203206		574	682.059	2835.03	39.8151	370849
575	1491.11	2529.38	49.625	103902		575	1789.6	2332.24	62.3789	203176		575	2311.05	291.072	113.796	370824
576	1031.56	2332.39	69.7031	103893		576	2333.08	2264.07	50.1919	203174		576	625.818	3005.31	35.2176	370785
577	489.568	2408.43	59	103881		577	2419.79	2230.24	65.7203	203138		577	2361.67	462	96.5519	370677
578	1725.39	2395.86	39.6667	103851		578	2224.11	2059.61	46.5294	202831		578	2253.22	486.012	74.9879	370485
579	649	2831.84	87.5333	103835		579	2050.54	2273.28	60.8444	202788		579	698.568	2907.75	45.0753	370343
580	504.942	2692.99	67.5385	103824		580	2243.71	1439.16	115.677	202709		580	849.423	2973.81	44.8889	370260
581	567.178	2457.86	94.4521	103755		581	2208.96	1973.11	55.8812	202665		581	1181.71	2751.9	49.2987	370143
582	917.442	1934.22	88.3896	103691		582	1776.14	2325.99	65.2857	202643		582	756.382	3083.69	58.8092	370135
583	1193.16	2569.45	79.5942	103660		583	2137.03	2073.04	30.6058	202629		583	1760.34	2691.41	18.85	370119
584	1387.09	2135.67	66.5204	103633		584	2318.33	2062.9	29.7941	202434		584	579.209	2878.03	52.4031	370106
585	818.238	2534.65	81.4286	103602		585	2172.51	2283.07	54.5379	202381		585	587.93	2726.42	49.5035	370090
586	1704.82	2210.3	23.5893	103555		586	1742.11	2304.44	64.2959	202377		586	1918.2	2801.31	18.5703	370009
587	578.219	2086.22	85.5312	103506		587	1894.06	2297.99	64.7368	202372		587	2457.71	2509.54	51.9577	369953
588	638.456	2570.99	81.3889	103436		588	2266.19	2003.43	45.6286	202315		588	2359.12	346.388	100.714	369740
589	1108.34	2072.33	86.5738	103435		589	1926.74	2308.72	60.0325	202169		589	545.299	2777.08	60.8902	369517
590	1859.26	2663.95	62.5405	103378		590	1916.72	2455.41	41.4128	201708		590	587.151	2979.42	36.5396	369443
591	1621.92	2444.89	44.5057	103347		591	2477.12	874.066	179.551	201629		591	2138.98	434.764	95.7637	369394
592	406.219	2811.27	82.6849	103305		592	1967.57	2264.61	59.0417	201619		592	626.127	3072.36	38.4254	369312
593	1133.33	2068.67	64.4118	103262		593	2213.55	2449.02	50.8621	201521		593	635.012	2839.27	45.6994	369181
594	1205.57	2268.2	53.4902	103261		594	2259.99	2348.68	74.675	201450		594	2048.03	437.758	94.553	368946
595	1745	2300.1	23.4328	103217		595	2133.63	2297.86	49.9793	201358		595	2116.2	413.929	99.9396	368925
596	1874.38	2246	44.9167	103130		596	1946.86	2329.41	94.9099	201346		596	708.242	3075.34	40.3072	368777
597	905.867	2009.4	119.48	103119		597	2169.6	1869.47	51.9389	201314		597	2143.48	428.266	117.905	368770
598	1368.98	2554.25	59.4719	103092		598	1795.36	2340.34	64.9185	201257		598	703.731	2930.73	41.4892	368605
599	1440.38	2513.69	63.3944	103011		599	1953.59	2365.05	61.7252	201183		599	2595.46	2777.31	67.4897	368579
600	994.278	2193.42	108.468	103005		600	771.337	2402.21	115.772	201022		600	1137.37	2672.67	52.0325	368468
601	1502.25	2649.81	61.4828	103000		601	1887.07	2356.77	52.2578	201021		601	652.622	3181.87	66.2021	368409
602	621.493	2040.24	126.701	102953		602	2053.28	2263.97	49.626	200936		602	602.553	3011.42	34.5379	368274
603	1173.44	2305.01	56.5104	102946		603	2108.48	2081.01	71.21	200858		603	938.27	2893.34	55.9562	368055
604	533.85	2518.25	58.65	102896		604	2157.64	1492.65	110.262	200832		604	674.319	2862.62	33.521	368020
605	327.628	2153.06	107.57	102698		605	907.853	2210.58	168.918	200826		605	542.587	2895.86	60.7	367994
606	747.313	2646.04	81.5152	102646		606	2239.07	2079.69	49.1849	200742		606	2090.96	434.824	89.7676	367947
607	1217.4	2084.07	46.0855	102643		607	2164.97	2104.9	66.25	200691		607	1442.9	2714.98	38.8516	367734
608	552.771	2674.76	82.6	102590		608	2621.08	1014.16	217.335	200593		608	2507.58	2786.02	28.855	367628
609	1039.33	2337.2	74.3457	102576		609	1632.94	2434.17	47.9931	200455		609	1638.78	2646.93	28.9188	367553
610	1504.64	2399.31	46.0595	102575		610	1720.37	2280.72	66.1919	200449		610	2438.57	2024.82	51.9579	367546
611	394.902	2150.29	94.6739	102568		611	2059.8	2455.43	61.9153	200386		611	459.604	3054.99	45.875	367498
612	1333.33	2309.75	37.6364	102457		612	986.897	2485.98	88.1871	200384		612	2376.94	2733.36	25.5462	367418
613	1887.18	2162.87	62.0303	102456		613	2636.63	977.171	219.527	200323		613	2319.39	625.325	99.6707	367394
614	498.064	2264.98	96.8085	102449		614	891.233	2531.01	113.822	200242		614	763.716	2960.64	34.3919	367355
615	707.011	2842.7	87.7826	102439		615	1931.91	2383.82	76.7283	200173		615	2224.8	310.535	128.315	367215
616	557.437	2591.28	94.9612	102336		616	2094.95	2421.47	73.2625	200173		616	2232.02	569.86	111.579	367175
617	1856.46	2265.59	53.7857	102260		617	2610	892.95	200.871	200100		617	2552.36	2722.62	35.0132	367145
618	911	2425.81	63.5373	102254		618	2253.17	2192.62	50.0476	200055		618	2376.63	340.168	99.1801	367096
619	1679.58	2316.13	40.5132	102214		619	2131.46	2304.57	44.0556	200043		619	1304.77	2723.69	34.0726	367071
620	779.362	2116.66	78.6552	102192		620	644.923	2221.15	146.077	199934		620	2263.12	860.588	99.7425	367042
621	1851.17	2004.6	39.8621	102190		621	1859.09	2358.31	53.2701	199926		621	1212.43	2772.52	61.782	366850
622	686.662	2141.56	81.4225	102175		622	908.812	2344.76	148.088	199888		622	2067.64	456.775	103.786	366848
623	1665.57	2335.76	34.3175	101965		623	1695.27	2325.04	67.0075	199882		623	2418.91	341.448	89.9617	366544
624	1853.45	2308.33	59.4958	101935		624	2154.26	2072.11	84.9355	199828		624	2290.49	459.28	89.3065	366455
625	437.904	2194.28	90.1923	101897		625	888.471	2427.83	118.892	199780		625	773.793	3153.65	48.0667	366395
626	597.45	2032.2	107.567	101856		626	2166.8	2429.68	65.5172	199740		626	767.44	3014.18	26.176	366196
627	505.08	2442.49	87.5287	101731		627	1687.56	2281.12	74.8824	199726		627	2324.35	2871.02	44.3054	366166
628	382.169	2635.16	115.517	101728		628	840.673	2161.81	139.893	199712		628	2090.52	351.495	111.879	366159
629	1151.8	2087.88	67.4941	101713		629	2339.09	2381.69	55.5606	199568		629	568.304	2896.41	55.9565	366115
630	1770.61	2072.03	37.8	101676		630	855.018	2594.39	99.5413	199365		630	716.515	2886.9	55.5	366014
631	1560.64	2304.54	63.4746	101657		631	1933.55	2371.53	82.0784	199307		631	482.101	3176.61	61.8274	366011
632	1771.11	2258.57	41.5222	101609		632	2183.13	2111.25	60.5119	199207		632	1197.57	2627.8	41.1761	365885
633	1382.28	2443.75	36.7353	101574		633	2294.61	2025.41	47.1356	199189		633	598.61	2905.82	58.4113	365865
634	1412.82	2067.27	65.7727	101506		634	2156.13	2328.55	60.9885	199172		634	688.037	2776.02	67.1117	365808
635	682.625	2370.3	82.125	101480		635	2064.43	2277.42	40.9814	199167		635	1149.64	2839.79	60.5474	365780
636	1024.51	2319.33	97.6667	101465		636	2083.7	2337.94	36.7939	199095		636	2209.3	2775.65	44.8784	365507
637	1699.68	2206.54	21.5846	101445		637	1143.51	2349.99	94.0333	199082		637	2238.77	2752.6	17.3273	365407
638	652.256	2736.85	68.4186	101410		638	1835.44	2332.26	51.6094	199051		638	2188.18	363.007	107.533	365309
639	1517.85	2608.27	66.6949	101326		639	1586.87	2437.04	51.0244	199005		639	2280.33	325.174	94.2158	365154
640	2281.08	2011.58	64	101293		640	2072.94	2304.48	51.8837	198999		640	565.296	2863.52	68.1358	365029
641	358.949	2418.03	86.5063	101257		641	1955.03	2314.19	52.5727	198968		641	1228.4	2707.49	49.4189	364983
642	1564.74	2336.82	59.3656	101255		642	1937.23	2399.37	59.8098	198955		642	563.914	2723.7	51.6514	364877
643	1021.58	2080.53	81.5301	101244		643	1855.86	2341.65	48.8271	198916		643	890.486	2857.29	39.7394	364872
644	642.624	2663.53	77.5059	101220		644	1701.01	2461.53	43.52	198848		644	2276.54	1457.26	79.4793	364830
645	482.773	2678.35	74.4455	101140		645	2058.31	2285.52	44.0067	198839		645	2342.95	2661.02	34.12	364678
646	1392.24	2546.58	57.5926	101110		646	585.158	2542.92	120.367	198834		646	2125.1	376.433	102.509	364609
647	1008.09	2226.13	98.6029	101076		647	1000.81	2462.99	109.211	198761		647	1012.56	2852.54	67.0805	364547
648	402.887	2197.2	106	101027		648	2533.01	974.125	186.457	198677		648	1467.56	2788.55	37.831	364450
649	1723.35	2313.85	23.7609	100944		649	1092.06	2488.45	87.7895	198617		649	1793.69	2674.76	37.4775	364448
650	501.743	2319.49	75.473	100897		650	1965.71	2438.51	56.4074	198517		650	1948.8	2683.8	33.9487	364438
651	1096.61	2225.85	83.2941	100880		651	2315.22	1996.76	55.1463	198223		651	723.994	3121.47	71.6646	364270
652	784.145	2300.22	99	100865		652	2136.94	2412.53	55.0952	198200		652	518.466	2899.52	47.2857	364161
653	2005.16	2292.79	45.3871	100859		653	2140.26	2361.52	65.3151	198110		653	1166.78	2701.2	42.5482	364009
654	387.163	2639.8	73.2143	100825		654	1950.73	2352.73	69.3205	198107		654	2467.77	369.985	94.0148	363959
655	318.216	2579.93	77.3235	100745		655	2206.37	1958.03	52.4239	198031		655	693.717	2951.11	61.4654	363840
656	552.977	2226.45	105	100725		656	1789.26	2291.11	61.2781	197967		656	2389.11	2695.48	27.5	363439
657	788.523	2330.48	70.9545	100666		657	1166.61	2213.21	109.861	197958		657	2306.64	1329.47	85.6777	363339
658	1971.29	2287.43	45.2769	100594		658	1747.48	2313.54	53.2661	197911		658	694.306	3095.38	33.8629	363280
659	435.712	2252.02	72.5303	100589		659	1837.93	2323.77	50.0734	197908		659	2420.74	2729.05	29.871	363212
660	714.056	2565.86	82.4306	100563		660	1526.2	2470.4	68.7143	197882		660	2201.8	327.459	91.6101	363197
661	1007.02	2292.57	104.099	100542		661	2679.3	864.893	221.137	197879		661	1037.35	2770.17	47.8743	363186
662	566.846	2597.75	85.7385	100499		662	2199.61	1939.54	55.6383	197837		662	797.505	3220.55	66.8911	363151
663	1761.01	1997.2	68.1974	100382		663	2084.64	2335.46	91.0112	197773		663	2520.91	456.166	101.176	363095
664	1058.78	2183.29	88.5385	100367		664	653.471	2202.41	141.692	197753		664	1949.69	2769.17	15.3988	363067
665	495.231	2690.03	70.4725	100351		665	2121.6	1836.59	110.289	197748		665	2573.13	448.669	108.439	362896
666	1512.07	2335.55	72.5135	100321		666	2002.19	2393.41	55.9133	197700		666	534.626	3000.26	59.6196	362810
667	749.425	2549.53	80.4598	100319		667	1764.34	2405.35	66.2089	197678		667	1163.17	2826.41	52.6069	362808
668	652.754	2832.29	78.4928	100267		668	1497.35	2432.1	60.8544	197593		668	2547.54	589.255	95.0163	362795
669	552.923	2546.86	53.5385	100261		669	2020.85	2363.75	56.4836	197586		669	708.739	2837.84	62.7758	362663
670	352.731	2530.03	75.7308	100220		670	2308.86	1981.72	51.4598	197553		670	783.811	3048.04	39.7803	362619
671	1290.79	2451.66	34.4478	100204		671	1654.11	2418.34	65.4444	197531		671	2307.58	1763.09	65.2686	362474
672	402.695	2190.07	81.3559	100157		672	618.392	2553.22	104.546	197468		672	2239.96	542.079	95.3515	362332
673	707.656	2299.14	66.6875	100145		673	1565.71	2393.14	81.9828	197461		673	662.944	3241.95	62.5342	362177
674	406.141	2590.95	71.5	100122		674	2380.62	2032.85	44.4758	197314		674	2147.53	322.755	106.497	362154
675	1945.45	2667.34	70.5	100089		675	2154.75	2353.79	77.1579	197177		675	2102.62	351.545	99.7753	361803
676	769.638	2278.84	113.553	100075		676	2217.24	2153.16	86.3966	197150		676	476.049	2792.39	51.2708	361682
677	1848.58	2353.24	47.3521	100064		677	2025.81	2445.01	44.9596	197092		677	2415.5	388.008	125.447	361663
678	628.111	2609.09	104.278	100010		678	903.553	2488.1	111.467	196937		678	1209.39	2806.15	61.7174	361657
679	1070.8	2352.51	75.4429	99997		679	2080.58	2380.72	68.5222	196885		679	2418.63	1699.26	78.1899	361649
680	949.373	2005.76	75.902	99980		680	2320.24	2007.64	46.9595	196870		680	710.652	2953.86	65.4817	361613
681	1501.02	2275.14	65.56	99977		681	2231.44	1873.27	68.6233	196762		681	770.482	2846.5	56.741	361563
682	1232.5	2227.24	87.4024	99929		682	1706.13	2395.85	89.3333	196551		682	743.576	3194.04	66.1869	361548
683	1519.24	2101.28	84.4535	99927		683	2062.63	2358.73	100.245	196453		683	664.365	2815.65	49.8438	361524
684	1696.49	2156.67	52.48	99905		684	2033.71	2388.59	73.0357	196431		684	1997.28	2725.39	32.3537	361522
685	1659.33	2403.78	30.6812	99873		685	1829.06	2508.78	52.2018	196419		685	2382.81	615.387	115.936	361436
686	1751.48	2234.47	27.2742	99843		686	693.237	2479.5	119.867	196386		686	2425.98	1863.49	74.1304	361316
687	669.138	2784.14	73.7414	99823		687	2213.3	2353.42	44.043	196359		687	632.201	2931.77	57.3958	361038
688	1863.46	1996.78	91.4105	99764		688	1852.59	2283.85	52.0732	196314		688	1164.11	2767.54	66.5087	360876
689	468.119	2568.45	67.5672	99704		689	1897.86	2412.96	81.752	196289		689	2020.18	441.045	101.207	360844
690	1262.32	2079.83	77.4301	99704		690	2469.81	2306.67	33.8113	196198		690	1017.36	2964.18	75.3204	360844
691	530.05	2860.85	92.5625	99648		691	1654.61	2276.1	78	195946		691	804.23	3094.23	68.1585	360741
692	702.436	2612.83	81.5644	99634		692	2323.99	2053.19	72.5309	195888		692	418.832	2742.77	56.6807	360617
693	1686.61	2073.11	55.9469	99625		693	557.015	2164.8	178.69	195841		693	858.518	2916.45	57.1726	360570
694	1681.61	2690.2	61.1845	99584		694	2013.81	2322.37	30.5581	195841		694	2141.03	303.526	108.237	360408
695	915.98	2086.02	75	99517		695	2064.22	2278.68	48.4568	195746		695	2314.32	277.87	104.249	360396
696	1338.04	2103.52	81.3889	99515		696	2268.99	1998.57	41.4328	195689		696	509.793	3146.24	62.0272	360394
697	1878.56	2004.59	48.4615	99506		697	1966.2	2294.92	81.0147	195685		697	2376.18	495.774	89.9245	360336
698	455.95	2496.27	90.5833	99442		698	1872.23	2347.12	70.4848	195611		698	2058.12	472.058	110.727	360228
699	506.176	2558.86	56.4505	99418		699	2683.92	895.156	210.108	195565		699	483.803	2718.63	56.8639	360210
700	1602.07	2162.46	32.4907	99413		700	1956.6	2406.44	59.7841	195513		700	2450.98	379.314	108.039	360169
701	986.42	2134.37	91.58	99370		701	746.933	2588.71	111.084	195438		701	2140.91	427.755	82.362	360066
702	409.144	2818.97	92.4778	99369		702	1087.17	2114.18	147.288	195423		702	2119.78	440.262	107.02	360010
703	1298.23	2266.19	39.6571	99326		703	1985.54	2261.56	53.4804	195338		703	503.289	2832.28	50.3906	359931
704	1448.85	2483.33	53.6705	99283		704	1664.92	2359.85	71.4586	195335		704	2273.54	427.486	80.8702	359721
705	607.529	2457.19	80.0857	99265		705	2168.75	2434.47	28.7304	195248		705	647.024	3206.64	52.3155	359660
706	1319.2	2129.96	37.2	99263		706	2009.59	2386.89	88.2424	195242		706	1185.27	2653.78	49.0955	359628
707	603.398	2553.73	60.4545	99191		707	2188.35	2173.94	20.5294	195196		707	755.53	3037.87	29.5299	359554
708	1339.09	2098.23	43.3372	99186		708	1163.81	2338.32	100.079	195181		708	739.064	3274.89	67.6436	359439
709	1631.87	2231.86	70.3333	99157		709	1791.55	2287.73	54.6849	195095		709	2365.57	415.967	115.588	359392
710	533.333	2244.65	76.3182	99107		710	1947.36	2273.13	54.1368	195089		710	876.113	2975.08	57.4088	359281
711	1115.07	2214.62	101.606	99095		711	2161.65	2221.12	87.6161	195086		711	2107.05	252.701	119.671	359256
712	460.296	2867.81	99.4568	99084		712	689.503	2390.6	109.603	194984		712	2148.26	311.105	109.645	359195
713	882.533	2052.53	108.48	99057		713	1159.15	2330.27	94.2797	194949		713	766.704	2864.68	37.8944	359188
714	499.214	2539.18	77.3929	99053		714	2001.41	2413.08	51.4674	194879		714	2414.28	2845.42	26.1559	359108
715	524.386	2266.24	65.4429	99049		715	1810.63	2258.06	65.3739	194740		715	2465.64	415.106	109.503	358990
716	451.71	2299.48	65.6774	99022		716	2171.7	1958	48.0177	194655		716	1343.93	2696.8	29.6754	358986
717	718.17	2570.26	63.9574	99014		717	2113.41	2145.31	83.9533	194652		717	2397.5	279	118.945	358864
718	330.729	2545.67	91.4206	98945		718	1803.96	2374.8	47.3981	194623		718	568.657	3045.45	44.5051	358720
719	1110.14	2215.26	110.089	98901		719	1920.35	2394.03	51.7156	194598		719	428.548	2850.42	54.5	358703
720	821.258	2364.01	87.236	98891		720	1837.65	2486.72	51.4255	194508		720	965.04	2977.94	35.121	358547
721	1334.64	2465.72	46.5467	98864		721	1709.64	2369.04	61.902	194505		721	2257.01	564.492	84.6541	358546
722	454.592	2420.62	117.479	98830		722	2559.01	955.544	206.328	194494		722	1689.92	2579.49	40.9068	358518
723	1550.34	2707.7	63.96	98827		723	1815.16	2276.44	60.6	194360		723	968.841	3026.66	59.5032	358486
724	939.158	2113.43	89.4868	98803		724	2141.82	2328.37	42.4359	194093		724	1229.25	2765.95	42.1307	358365
725	533.41	2908.13	98.4578	98798		725	2437.78	2108.27	61.4766	194080		725	722.309	3203.28	64.9276	358284
726	916.085	2172.56	96.561	98733		726	1799.13	2525.48	49.9825	194071		726	2384.12	2863.56	31.6871	358271
727	1259.6	2333.97	53.6552	98707		727	2203.97	2436.39	61.1667	194016		727	1651.11	2628.23	19.2757	358168
728	882	2172.69	102.184	98680		728	2312.71	2079.72	57.12	194011		728	1131.18	2679.49	40.6378	358077
729	618.696	2702.03	74.3623	98648		729	679.11	2431.43	104.477	193906		729	806.745	3075.3	67.65	358021
730	1803.87	2665.86	52.4388	98629		730	2214.29	2001.58	34.2126	193864		730	982.586	2910.78	70.9079	358009
731	1340.04	2221.34	48.1134	98607		731	1858.22	2323.94	49.0737	193852		731	574.105	3157.59	66.6776	357890
732	1881.14	2509.3	67.4773	98599		732	2024.18	2415.68	50.4742	193818		732	537.069	2861.63	51.5115	357875
733	446.148	2193.79	111.344	98494		733	1992.27	2392.69	89.4012	193626		733	818.682	3058.12	37.858	357842
734	493.688	2750.22	104.649	98482		734	1103.99	2141.74	148.285	193538		734	1223.41	2696.92	40.1171	357824
735	378.356	2515.56	71.4554	98441		735	1078.82	2420.07	87.9773	193362		735	467.951	3012.62	44.162	357756
736	440.778	2764.62	92.3016	98375		736	2223.14	1915.18	36.0306	193333		736	856.043	3137.81	46.539	357709
737	453.447	2655.8	99.8058	98335		737	2259.88	2338.6	45.1532	193269		737	607.254	2772.98	46.9206	357666
738	1778.35	2070.41	75.5542	98137		738	1793.62	2400.95	59.5106	193249		738	1102.28	2924.23	62.5682	357651
739	1743.92	2461.26	44.8194	98001		739	1122.53	2454.32	92.0189	193170		739	1843.67	2694.27	34.9697	357623
740	366.978	2320.33	112.567	97976		740	2254.49	2118.93	24.0395	193154		740	1422.18	2699.98	22.0231	357585
741	1399.67	2532.44	47.5079	97960		741	2204.39	2055.47	62.1032	192974		741	2548.16	2856.35	42.5455	357454
742	497.677	2602.6	89.5077	97947		742	2154.54	2239.66	44.02	192953		742	2484.25	2755.23	30.032	357433
743	376.085	2198.25	87.566	97856		743	2217.57	1983.8	47.3107	192878		743	1200.82	2698.43	36.9281	357177
744	736.269	2551.62	79.5513	97852		744	2249.52	2086.2	76	192848		744	2340.2	2712.68	55.8537	357159
745	989.045	2356.4	98.1798	97848		745	2258.96	2160.06	63.5529	192750		745	822.513	2778.91	67.1974	357105
746	915.625	2477.83	68.4444	97805		746	1847.96	2531.23	43.631	192703		746	845.721	2977.42	65.0714	357025
747	755.695	2596.1	100.439	97787		747	1781.68	2266.12	55.8398	192561		747	2337.95	266.714	110.337	356996
748	334.308	2357.1	88.8045	97749		748	2303.09	1898.81	57.686	192541		748	901.168	2972.02	31.3511	356955
749	441.172	2672.38	104.516	97696		749	726.561	2372.92	128.848	192519		749	2175.12	376.374	82.0325	356948
750	477.276	2749.14	61.931	97686		750	1742.24	2384.92	63.0337	192494		750	1977.56	453.946	101.395	356873
751	687.619	2000.99	96.5952	97624		751	1942.33	2294.41	89.0446	192484		751	2220.16	525.188	84.3466	356868
752	1000.84	2344.34	92.6364	97574		752	2047.46	2311.96	32.968	192472		752	2314.73	1144.91	93.4826	356857
753	368.631	2605.15	92.381	97548		753	2280.76	1502.21	111.244	192381		753	2400.05	426.682	86.1761	356831
754	1063.41	1992.18	91.4559	97542		754	2660.56	865.148	169.836	192313		754	638.208	3037.01	61.8439	356806
755	420.621	2313.08	78.3939	97495		755	989.085	2402.01	122.442	192236		755	2289.51	332.972	95.095	356798
756	578.774	2746.7	94.4405	97481		756	2200.87	1964.87	52.9259	192227		756	559.809	3274.93	60.5	356672
757	616.053	2075.49	100.507	97469		757	2239.66	2069.01	32.6562	192207		757	2425.73	473.198	88.746	356540
758	1352.36	2443.86	48.4476	97452		758	1060.89	2468.15	98.2	192195		758	2281.4	1440.03	76.6038	356520
759	581.924	2273.94	112.439	97434		759	2143.32	2046.58	39.0917	192178		759	842.633	2890.64	62.2533	356467
760	1592.32	2035.43	72.5556	97421		760	1912.94	2280.1	57.0102	192042		760	757.778	3174.28	56.25	356391
761	446.311	2187.59	85.7541	97324		761	678.744	2133.01	174.772	192007		761	765.707	2991.02	71.7075	356369
762	1888.69	2251.46	44.1505	97286		762	2148.43	2311.87	42.4217	191970		762	553.466	2914.82	66.8957	356355
763	1364.01	2422.91	39.5283	97209		763	2130.36	2112.21	61.5524	191889		763	479.432	2844.58	56.6129	356345
764	2008.81	2750.96	66.7551	97160		764	2239.83	2308.7	61.2742	191875		764	2138.79	363.909	88.9585	356121
765	1734.21	2783.84	62.5062	97127		765	2059.21	2304.63	48.1909	191851		765	710.68	3197.52	72.7907	356083
766	1612.75	2594.45	56.4353	97116		766	926.079	2231.8	164.309	191835		766	2355.04	329.747	108.023	356005
767	948.887	2553.48	83.4789	96995		767	1141.68	2139.9	142.147	191804		767	803.922	2973.89	72.8922	355807
768	342.108	2162.38	108.516	96977		768	1583.78	2313.42	66.9167	191715		768	1133.8	2771.67	45.0405	355793
769	568.873	2297.71	68.6349	96976		769	1951.11	2400.84	52.8172	191691		769	887.34	2750.13	55.7533	355670
770	903.545	2246.23	87.3939	96957		770	2274.77	2259.98	38.4747	191641		770	2446.34	354.438	85.5548	355654
771	650.875	2337.91	62.2679	96901		771	2091.31	2284.04	39.2719	191469		771	2032.53	2663.66	29.5172	355603
772	525.196	2545.14	73.5761	96894		772	504.055	2550.06	119.064	191436		772	1967.47	421.391	105.992	355567
773	1302.38	2093.94	55.4679	96880		773	2058.31	2278.86	56.213	191412		773	606.015	3193.72	44.9848	355521
774	599.215	2570.55	105.708	96880		774	2725.23	769.521	185.493	191397		774	2249.77	609.257	105.864	355481
775	618.638	2089.31	131.387	96831		775	2026.39	2342.3	45.811	191387		775	2316.35	362.093	121.117	355463
776	1654.7	2131.36	97.0761	96822		776	1694.6	2289.69	70.1667	191210		776	532.41	3213.48	61.7689	355451
777	1586.25	2598.07	54.6353	96766		777	654.418	2286.32	137.26	191203		777	1342.09	2648.47	32.2115	355208
778	1785.76	2056.77	62.5	96645		778	1643.37	2387.62	77.4359	191182		778	2152.63	429.577	84.2057	355125
779	2183.24	2283.92	49.5465	96632		779	2291.36	2019.57	45.4861	190912		779	763.193	2778.84	64.6357	354836
780	1165.29	2071.89	74.525	96595		780	1924.97	2352.54	50.6187	190907		780	532.562	2853.1	62.098	354765
781	590.183	2118.35	106.767	96496		781	1845.83	2324.22	49.5098	190887		781	751.207	3109.8	50.8222	354752
782	530.062	2259.92	65.5781	96423		782	1088.45	2491.62	117.03	190842		782	1795.69	2692.96	18.4248	354739
783	1914.83	2404.97	50.5286	96407		783	2189.75	2261.1	56.1092	190782		783	2361.19	383.026	96.4792	354693
784	1856.63	2471.76	42.6267	96391		784	1630.86	2277.71	73.4706	190726		784	1444.62	2656.58	46.0603	354534
785	1034.52	2404.78	89.5432	96276		785	1829.84	2447.69	58.15	190713		785	2474.25	1691.75	60.6421	354503
786	1370.72	2493.5	44.6207	96208		786	2363.14	2401.49	50.6415	190528		786	2111.14	451.882	117.763	354503
787	1648.22	2566.16	50.5	96174		787	1845.85	2436.93	61.8545	190461		787	2272.04	403.023	82.3566	354481
788	1252.88	2298.51	49.3708	96024		788	1992.63	2461.61	63.5238	190394		788	2705.48	2624.93	64.0978	354461
789	937.926	2082.62	79.5294	96015		789	1963.8	2268.54	82.6943	190293		789	1896.7	2635.2	35.881	354443
790	578.973	2956.05	92.5733	95994		790	1062.13	2291.05	148.197	190227		790	1873.66	2628.61	27.2357	354328
791	1529.95	2344.75	51.1505	95941		791	1826.09	2453.39	43.4086	190152		791	2107.86	2715.9	24.3182	354256
792	392.337	2632.92	62.407	95910		792	1992.92	2285.58	56.8824	190104		792	2404.18	406.845	115.311	354236
793	1945.8	2349.83	37.4638	95901		793	1715.05	2267.34	72.0615	190037		793	833.623	2898.75	78.8263	354198
794	599.375	2151.86	115.188	95872		794	2200.5	1913.21	45.4486	190014		794	754.221	3275.04	66.0872	354194
795	1049.5	2122.95	58.4653	95870		795	2219.13	2370.54	45.1098	190011		795	2007.95	484.789	88.8239	354189
796	1199.1	2067.47	61.4744	95833		796	2149.47	2289.89	44.9581	189940		796	1202.41	2739.46	38.7724	354095
797	1186.16	2172.51	46.1311	95827		797	2104	2344.64	54.5128	189928		797	501.774	3061.85	49.1161	353853
798	480.746	2433.08	57.1905	95766		798	2219.19	2075.52	28.7895	189887		798	1934.89	2660.96	20.4508	353524
799	758.789	2408.03	82.4737	95750		799	2349.24	2224.15	48.5545	189849		799	651.071	2984.96	67.1858	353409
800	1390.97	2471.9	46.2	95742		800	1955.03	2267.81	70.0571	189834		800	631.708	2900.09	65.7225	353366
801	575.74	2293.41	106.521	95730		801	1571.32	2380.99	62.1233	189755		801	2391.08	422.378	94.2021	353253
802	699.785	2601.83	98.2043	95722		802	2295.82	1985.69	55.7917	189752		802	577.842	2757.2	56.8224	353187
803	505.337	2620.67	99.551	95713		803	1951.8	2295.17	67.23	189745		803	982.196	2780.76	40.3716	353169
804	1250	2055.68	80.6812	95703		804	2254.24	2347.04	55.49	189592		804	2361.5	431.583	94.9698	353164
805	1569.69	2105.46	73.5143	95703		805	2177.11	2360.43	45.5976	189576		805	2361.57	403.526	99.5592	353006
806	1335.15	2159.21	50.4118	95639		806	1876.96	2283.88	62.8621	189535		806	554.848	2902.19	62.7191	352921
807	1137.83	2087.63	102.474	95617		807	974.648	2536.01	88.497	189485		807	492	2829.88	42.7627	352870
808	1187.71	2098.96	95.7603	95580		808	2337.09	2183.74	31.5389	189429		808	615.52	2891.37	32.04	352866
809	1987.66	2078.84	39.4845	95548		809	994.818	2269.96	179.524	189380		809	709.97	3005.78	66.1098	352694
810	1286.34	2290.57	50.4625	95538		810	2071.87	2369.58	77.6435	189368		810	2303.5	2804.58	18.3772	352665
811	829.481	2018.52	87.519	95502		811	1792.91	2282.5	60.246	189339		811	1725.1	2704.54	19.2761	352653
812	1337.86	2381.49	33.6351	95500		812	1811.05	2267.22	58.5125	189280		812	2309.94	2858	32.5448	352612
813	356.66	2357.4	86.1509	95497		813	2058.1	2370.86	95.3592	189229		813	2385.69	2771.8	45.6779	352603
814	1364.76	2320.21	57.5056	95491		814	1727.48	2469.68	51.1238	189090		814	582.401	2987.53	62.1163	352468
815	487.233	2314.56	76.3721	95483		815	1218.2	2166.24	120.47	189090		815	2304.48	2867.7	30.8175	352451
816	680.982	2034.25	95.9123	95432		816	1164.17	2217.33	152.718	189016		816	442.361	2860.79	61.7161	352298
817	963.035	2435.77	85.5	95422		817	1720.15	2376.79	65.9528	188983		817	574.152	3284.75	55.019	352143
818	679.545	2659.52	67.4394	95393		818	1843.12	2407.45	40.96	188977		818	596.506	3237.65	70.9326	351948
819	980.145	2409.61	76.5132	95283		819	2322.78	1923.5	47.2033	188901		819	2284.71	667.485	89.965	351937
820	401	2512.56	58.9787	95263		820	2138.21	2039.04	36.4393	188829		820	1183.64	2705.52	39.9786	351884
821	1162.14	2110.96	49.5429	95243		821	2685.11	858.323	215.484	188747		821	735.693	2866.94	63.0894	351810
822	1362.74	2367.57	32.6885	95137		822	1781.35	2551.73	45.4737	188596		822	2070.09	381.385	105.453	351765
823	1758.61	1950.98	68.4194	95134		823	2029.8	2313.84	77.519	188543		823	433.906	3006.14	55.482	351748
824	2097.31	2506.68	62.5309	95093		824	1999.74	2300.99	87.3516	188368		824	2322.8	1607.28	59.6232	351748
825	369.962	2340.08	102.577	95069		825	2254.6	1956.67	56.3333	188337		825	817.597	2891.76	37.9328	351717
826	1631.44	1994.91	48.7719	95051		826	1121.28	2325.87	104.163	188273		826	2440.43	469.447	86.9248	351715
827	1533.26	2208.04	75.2195	95047		827	1994.89	2342.16	55.456	188241		827	2366.05	361.887	125.964	351589
828	611.667	2659.91	72.4943	95032		828	2079.78	2371.12	75.5538	188229		828	2292.5	256.425	106.062	351566
829	419.71	2575.6	60.2581	95007		829	2062.28	2390.61	48.809	188187		829	2037.15	362.481	103.346	351396
830	841.53	2378.38	93.2879	95001		830	1986.9	2316.04	68.4348	188181		830	2016.3	2732.82	21.9338	351353
831	979.072	2037.36	79.3188	94992		831	2209.73	2285.26	50.9521	188171		831	1553.85	2552.82	28.1374	351349
832	834.939	2494.14	81.4141	94949		832	1944.88	2473.85	35.5167	188145		832	1062.15	2693.81	46.1475	351206
833	995.672	2187.74	108.623	94933		833	1859.44	2379.47	84.8837	188043		833	916.549	2809.38	56.0301	351048
834	2598.57	2716.56	126.246	94905		834	1851.08	2307.94	73.2958	187916		834	674.267	2846.1	70.95	350846
835	442.5	2624.64	57.4487	94889		835	2194.35	2328.81	45.325	187909		835	1004.39	2901.37	36.0992	350820
836	2048.08	2766.34	82.5738	94887		836	1902.05	2350.45	53.4359	187907		836	711.104	3151.25	54.791	350785
837	579.571	2192.93	76.5571	94886		837	2158.31	2167.93	78.3505	187887		837	1415.41	2791.94	38.817	350739
838	1854.01	2232.58	51.4638	94869		838	1920.54	2463.73	52.6264	187853		838	1482.05	2668.13	17.932	350738
839	943.989	2173.62	100.466	94859		839	2307.15	2427.97	55.2893	187829		839	844.961	2790.94	68.9419	350686
840	1081.7	2413.76	68.525	94787		840	1738.17	2299.1	88.6083	187727		840	1028.18	2816.98	65.1143	350673
841	1356.77	2453.8	57.5	94720		841	2096.46	2357.14	66.7368	187633		841	2569.86	2460.38	62.8603	350619
842	1129.93	2089.16	54.378	94685		842	2209.8	2328.88	48.25	187514		842	2517.41	378.361	104.893	350615
843	407.457	2608.93	68.3857	94655		843	1066.72	2466.06	96.0142	187330		843	634.614	2801.4	65.6396	350539
844	617.436	2296.59	109.5	94616		844	1715.46	2291.6	64.4182	187319		844	965.007	2826	53.94	350519
845	1859.58	2103.04	45.5	94581		845	1939.18	2338.35	58.0149	187240		845	2416.27	511.354	74.5449	350500
846	826.828	2330.41	75.5253	94571		846	1991.44	2321.84	33.2366	187195		846	1321.95	2772.3	56.069	350442
847	1748.95	2177.32	36.0244	94459		847	662.844	2547.16	100.32	187048		847	2356.46	1546.68	65.2793	350339
848	480.051	2483.71	56.7458	94444		848	989.75	2264.21	164.268	187036		848	2084.01	396.746	82.4577	350226
849	368.696	2270.62	105.468	94443		849	2217.95	1966.35	45.0086	187018		849	2073.1	260.747	115.511	350120
850	1030.67	2082.04	67.5281	94428		850	2668.79	814.415	180.067	186980		850	2437.19	2779.41	36.1786	349921
851	1589.93	2427.52	40.451	94414		851	2139.85	2229.12	50.25	186895		851	2143.85	467.335	116.006	349895
852	604.022	2454.07	63.2	94383		852	2217.56	1964.54	39.4719	186870		852	628.362	3140.02	47.0993	349890
853	761.586	2155.88	110.009	94359		853	2307.43	2042.92	31.1905	186863		853	687.159	3109.4	44.3103	349757
854	734.506	2396.53	66.5195	94343		854	2263.07	1433.55	109.99	186709		854	1110.55	2683.24	56.7202	349750
855	1125.28	2137.08	47.4324	94339		855	1666.35	2293.31	71.3276	186580		855	2355.27	1125.21	95.8444	349506
856	616.159	2611.46	102.594	94336		856	1796.4	2321.49	55.9817	186567		856	2451.84	570.971	98.9951	349489
857	2012.2	2407.29	59.4524	94334		857	1870.15	2361.74	53.4062	186564		857	2324.7	399.39	125.456	349463
858	529.426	2723.64	79.8511	94331		858	2060.5	2410.43	79.486	186530		858	2370.97	1098.33	97.4803	349419
859	433.312	2349.78	64.5417	94322		859	723.957	2544.78	143.993	186308		859	625.194	2880.59	29.5612	349385
860	1867.41	2067.98	50.4455	94295		860	1884.47	2278	80.5341	186124		860	1933.29	2660.3	27.83	349377
861	690.189	2595.45	84.527	94284		861	2015.35	2286.12	38.16	186092		861	563.647	2870.99	48.5489	349364
862	1126.17	2139.17	80.5789	94270		862	1853.43	2360.15	60.6308	186047		862	2364.24	1735.36	77.1713	349348
863	867.694	2337.86	87.5556	94265		863	725.754	2540.1	116.119	186029		863	630.075	2909.86	44.5701	349280
864	632.787	2723.71	86.8533	94246		864	2201.59	1991.33	55.0114	185981		864	2606.96	2369.01	55.7888	349137
865	1027.6	2125.34	55.64	94243		865	1049.05	2321.81	155.414	185944		865	2354.19	2827.42	40.5574	349065
866	1417.43	2227.88	43.5122	94192		866	2042.12	2285.05	96.1441	185878		866	2198.58	403.627	106.759	349063
867	854.217	2005.99	99.1304	94178		867	1534.44	2371.38	85.2718	185864		867	2295.72	592.706	112.628	349042
868	322.867	2539.64	102.456	94099		868	1657.29	2366.8	73.6915	185829		868	943.227	3051.65	48.6378	349039
869	1455.59	2255.36	53.5259	94021		869	1944.44	2334.01	46.7534	185799		869	2323.3	291.994	116.138	349001
870	1358.76	2368.07	53.7091	94005		870	2275.61	1962.97	55.0533	185759		870	1470.49	2607.87	32.4143	348946
871	303.825	2627.17	75.2222	93946		871	2385.56	2057.08	44.8231	185759		871	474.119	3197.15	58.7682	348856
872	1323.33	2308.47	37.4615	93924		872	2061.65	2330.08	77.2143	185756		872	534.908	2834.68	45.7231	348828
873	379.143	2586.79	73.4505	93904		873	2219.65	2044.01	84.1848	185670		873	2501.22	343.76	95.095	348722
874	676.276	2497.72	60.6379	93878		874	1561.1	2414.34	60.2841	185551		874	2345.96	317.594	99.3014	348572
875	2936.91	2523.75	134.226	93876		875	1983.24	2283.87	38.9884	185523		875	1836.56	2745.44	33.3973	348532
876	1289.41	2421.33	68.0325	93868		876	1043.16	2448.27	108.471	185477		876	750.248	3187.34	69.4845	348326
877	639.379	2724.69	69.3793	93864		877	884.387	2587.66	91.8871	185452		877	2386.24	381.07	121.598	348233
878	1238.77	2195.02	43.7273	93846		878	2419.41	2184.3	47.4086	185425		878	616.755	3074.65	44.4615	348202
879	358.083	2131.85	99.2	93845		879	2273.66	1981.65	51.4688	185300		879	609.162	2981.72	37.1231	348164
880	1070.69	2511.88	83.4769	93818		880	2264.47	1988.46	28.5059	185258		880	2005.87	462.704	93.9012	348163
881	1870.75	2262.39	40.4533	93813		881	1769.37	2443.37	71.3883	185228		881	704.881	3153.83	65.5459	348096
882	975.583	1997.01	90.6111	93740		882	1812.6	2458.06	64.881	185179		882	597.551	2759.77	48.6377	348012
883	475.973	2331.29	93.8356	93726		883	1810.5	2307.76	79.5513	185159		883	605.752	2809.91	62.0621	347914
884	1239.21	2273.13	36.4762	93695		884	2284.32	2162.69	54.5804	185151		884	1782.7	2723.96	29.8033	347785
885	1493.86	2583.05	60.0678	93690		885	2365.14	2081.17	48.549	184935		885	2199.4	334.416	102.235	347607
886	1328.43	2149.21	36.3036	93686		886	1740.06	2550.14	50.4435	184912		886	624.252	2735.73	71.0126	347512
887	1061.86	2191.55	105.459	93686		887	2136.44	2293.87	61.5211	184905		887	2540.72	1509.88	71.3191	347403
888	488.779	2337.97	61.3766	93616		888	1981.8	2359.38	48.0982	184866		888	2373.09	389.97	93.7284	347355
889	553.25	2253.05	85.2727	93612		889	2299.94	2285.49	40.2258	184832		889	2478.21	415.491	122.702	347332
890	1524.65	2638.49	65.4487	93580		890	2212.26	2075.82	88.2881	184801		890	897.995	2760.82	50.2432	347237
891	584.646	2465.84	81.7722	93562		891	1910.27	2369.41	51.3797	184631		891	2405.43	285.703	110.068	347166
892	479.763	2667.48	72.7807	93528		892	2120.29	2300.99	67.058	184607		892	784.517	3130.72	71.3017	347013
893	620.896	2711.64	77.9552	93514		893	1794.58	2536.73	47.5085	184589		893	2339.11	2701.68	28.8361	346894
894	1872.65	2221.96	30.9407	93495		894	2166.16	2097.45	53.1579	184560		894	521.966	2808.32	45.2432	346886
895	1400.95	2176.99	32.6027	93478		895	2551	1037.07	199.341	184523		895	2212.78	734.987	94.0592	346815
896	897.659	2146.04	65.2824	93473		896	2334.75	2422.19	55.7623	184520		896	2552.39	2747.63	49.64	346757
897	1885.49	2016.21	46.5694	93436		897	2245.53	2125.72	26.8333	184445		897	488.899	2918.09	47.031	346721
898	1829.14	2118.86	34.5517	93436		898	2387.25	2252.82	41.8137	184445		898	786.58	3031.36	36.4852	346699
899	1711.48	2293.81	31	93435		899	2002.44	2287.96	82.8	184310		899	2095.11	385.844	102.277	346694
900	421.431	2506.94	98.7255	93410		900	772.755	2577.43	99.6667	184280		900	2345.54	2693.55	34.8475	346606
901	714.926	2094.49	83.7059	93349		901	1874.27	2491.85	39.55	184262		901	426.697	2811.01	59.1939	346599
902	899.371	2026.66	68.433	93331		902	2130.26	2202.15	60.5	184148		902	2542.38	2255.77	52.7771	346597
903	666.758	2221.14	81.5606	93320		903	831.912	2460.17	119.477	184146		903	2391.58	431.557	99.3924	346597
904	675.673	2372.79	103.215	93305		904	2120.81	2326.09	77.3723	184139		904	531.658	2990.02	65.475	346503
905	609.758	2299.41	83.7474	93295		905	1656.72	2331.17	79.5233	183931		905	894.622	2963.61	52.6528	346431
906	956.341	2387.82	63	93273		906	2287.39	2336.78	41.8304	183929		906	1164.08	2673.41	39.0892	346260
907	1707.02	2587.85	55.5119	93270		907	2202.53	1859.6	48.4239	183925		907	472.626	2971.37	62.1905	346045
908	979.989	2332.74	66.5341	93262		908	905.787	2500.32	119.73	183896		908	700.205	2996.14	55.0361	346032
909	514.698	2497.92	78.7736	93243		909	2372.29	2373.84	59.035	183878		909	1333.28	2796.18	38.586	345963
910	963.593	2226.46	72.1605	93211		910	525.328	2463.08	129.053	183873		910	788.006	3007.79	67.4061	345909
911	531.478	2266.45	65.4203	93178		911	2358.34	2099.47	50.9176	183868		911	2523.1	2421.4	59.9733	345845
912	1758.22	2059.04	60.5125	93130		912	1587.39	2365.5	80.3761	183853		912	2259.44	618.578	84.8438	345724
913	1273.98	2276.19	46.3853	93090		913	554.815	2553.66	118.185	183796		913	853.466	2867.59	73.4933	345723
914	496.568	2543.04	107.495	93016		914	864.493	2261.05	163.261	183749		914	2234.09	406.707	75.878	345711
915	1135.99	2158.61	105.296	93012		915	1288.72	2302.83	93.3702	183722		915	2089.06	402.585	99.1415	345651
916	530.012	2590.39	64.0941	92968		916	1511.59	2426.91	63.8248	183499		916	2310.2	2665.88	36.4724	345610
917	671.208	2779.58	72.2917	92890		917	2188.18	1946.92	54.598	183494		917	1001.88	2949.5	40.0647	345533
918	546.164	2618.37	67.5522	92873		918	1616.78	2310.45	58.6667	183436		918	800	3144.43	37.9012	345529
919	1700.11	2168.91	50.5806	92872		919	2123.85	2387.56	87.1899	183432		919	1532.41	2725.79	30.1259	345516
920	485.041	2609.61	74.4694	92860		920	2218.41	2407.47	54.5116	183432		920	904.214	3037.49	72.2366	345488
921	1152.76	2006.82	66.7522	92850		921	939.041	2466.02	117.73	183365		921	2256.59	2860.62	22.7181	345363
922	947.701	2405.5	95.729	92828		922	2226.25	2193.41	27.8857	183346		922	566.331	3224.27	64.4865	345306
923	372	2540.28	61.1724	92798		923	1024.05	2434.34	111.258	183345		923	2493.3	363.941	107.935	345139
924	1539.01	2294.09	44.4318	92777		924	2214.02	2289.79	58.8485	183282		924	1806.85	2725.78	15.4706	345010
925	1897.13	2180.98	45.6182	92751		925	2187.69	2267.23	74.1194	183266		925	911.374	2802.11	32.5324	344919
926	591.312	2601.26	58.4935	92734		926	959.682	2233.07	164.207	183204		926	557.892	2678.25	61.8735	344893
927	1265.79	2082.64	59.3766	92706		927	2159.13	2294.56	43.7863	183198		927	2407.79	525.046	73.3103	344768
928	1242.68	2086.01	56.3699	92661		928	2158.28	2016.37	36.3537	183143		928	2054.97	518.51	95.4258	344403
929	2291.51	2392.64	61.7685	92614		929	2280.29	2151.47	52.5339	183050		929	850.394	2916.93	61.8662	344384
930	1692.42	2539.81	49.6629	92606		930	2090.91	2386.45	74.6437	183034		930	427.873	2865.49	62.5282	344368
931	917.46	2221.31	65.129	92598		931	1082.25	2180.87	168.358	182990		931	795.699	3061.06	32.3495	344302
932	246.924	2247.64	102.457	92595		932	1963.64	2339.14	41.3961	182984		932	600.662	2926.53	38.7068	344295
933	389.07	2476.91	65.4211	92595		933	1907.5	2337.85	58.8382	182935		933	1243.44	2782.11	46.2023	344293
934	501.148	2252.49	64.4508	92558		934	2405.03	2143.08	68.7174	182934		934	1644.62	2785.8	28.873	344207
935	702.481	1985.94	106.139	92418		935	1897.53	2409.34	54.1765	182867		935	1707.85	2728.82	31.4154	344116
936	1885.74	2252.15	36.1389	92401		936	1994.83	2278.13	51.5	182829		936	593.45	3124.59	44.124	343865
937	1325.59	2173.8	46.5303	92373		937	2270.69	2378.42	24.9899	182672		937	2326.51	461.449	120.395	343653
938	431.259	2491.93	72.3793	92366		938	1832.04	2387.87	41.0986	182574		938	582.006	3186.55	62.3248	343575
939	567.7	2545.9	107.74	92362		939	2242.94	2008.54	42.3711	182523		939	946.458	2978.37	80.1417	343458
940	747.918	2116.88	75.3881	92360		940	1857.99	2385.62	88.1607	182515		940	757.662	2962.58	39.4029	343365
941	459.099	2165.89	131.011	92292		941	1963.58	2299.32	60.9035	182472		941	635.048	2710.43	65.8457	343289
942	465.933	2704.51	78.7778	92267		942	2155.49	2500.52	40.8626	182335		942	2043.12	2679.3	37.2759	343284
943	1280.31	2336.09	51.6379	92259		943	838.184	2148.43	185.679	182322		943	951.627	2919.51	72.4759	343254
944	1803.61	2061.01	101.494	92252		944	2138.59	2091.6	66.6813	182306		944	2320.78	753.744	106.647	343252
945	1239.51	2052.15	61.3692	92235		945	1916.25	2334.28	55.9302	182299		945	2550.05	558.383	100.191	343182
946	1010.04	2311.33	90.3529	92178		946	1913.86	2457.31	51.9624	182213		946	2120.4	385.126	98.7862	343105
947	1346.85	2388.04	34.5765	92153		947	2142.84	1869.93	68.5752	182181		947	2150.33	2848.52	27.8639	342888
948	907.987	2126.06	105.597	92150		948	725.804	2160.02	157.64	182104		948	833.094	2843.4	36.5	342878
949	668.6	2357.19	103.506	92137		949	1954.13	2578.51	37.7402	181990		949	854.287	2749.7	50.7295	342572
950	641.706	2965.89	87.4824	92135		950	2002.83	2264.84	47.7143	181910		950	798.356	2871.04	55.2203	342555
951	359.821	2296.76	111.036	92109		951	1801.56	2305.6	78.0112	181846		951	2142.81	334.894	89.0529	342276
952	388	2417.48	78.8027	92074		952	2172.71	2014.75	66.875	181824		952	425.007	2979.23	48.3699	342214
953	1087.62	2506.57	80.5341	92055		953	2244.18	2022.74	63.4242	181730		953	940.848	2849.03	71.3931	342079
954	688.173	2008.99	115.6	92027		954	2146.55	2360.91	56.6212	181660		954	2206.08	2822.57	25.3677	342044
955	1928.51	2273.64	35.7818	91993		955	1872.73	2370.09	56.1495	181647		955	600.661	3097.48	38.125	341975
956	2037.51	2684.41	63.2553	91981		956	1884.63	2448.74	67.9207	181563		956	582.592	3304.4	56.1316	341798
957	404.034	2596.38	90.4886	91965		957	2201.59	2314.06	71.0088	181451		957	594.241	2988.77	63.6131	341777
958	458.297	2388.75	73.0169	91941		958	2053.74	2263.1	70.4268	181437		958	926.82	2881.22	63.6826	341743
959	434.215	2295.41	92.4557	91926		959	2228.43	2171.5	22.5526	181360		959	507.22	2744.28	58.3071	341705
960	1683.21	2433.87	45.4588	91869		960	2317.61	2068.65	80.4014	181342		960	756.601	3098.73	67.1216	341666
961	1792.12	2473.71	37.8462	91858		961	1807.39	2285.87	59.7632	181300		961	884.308	2884.81	39.4219	341608
962	427.538	2310.42	63.5513	91779		962	545.637	2454.83	126.815	181280		962	556.878	2884.25	36.513	341583
963	606.851	2090.9	85.3218	91778		963	2025.42	2475.53	32.7826	181236		963	2294.58	760.676	93.7892	341465
964	1246.42	2045.88	79.7101	91763		964	2323.33	2099.24	77.9451	181222		964	2126.68	327.535	99.1419	341411
965	1073.35	2474.96	74.5054	91744		965	1834.55	2339.85	59.5541	181144		965	2336.52	339.267	100.425	341317
966	1384.62	2434.73	35.4727	91728		966	2148.86	2364.7	67.12	181128		966	2088.11	360.788	117.515	341171
967	903.628	2353.81	63	91727		967	1266.19	2342.03	91.1849	181084		967	2320.91	428.088	76.7027	341168
968	1572.01	2155.82	50.5556	91662		968	1838.73	2410.84	45.3516	181004		968	747.256	2832.98	49.0427	341119
969	799.37	2242.85	67.4691	91660		969	1171.59	2129.6	144.027	180807		969	2429.9	409.864	82.9882	341039
970	1926.08	2434.44	39.9386	91639		970	2322.27	2156.08	72.0721	180660		970	2337.86	744.679	111.092	341011
971	916.536	2406.78	89.6087	91616		971	2239.16	1998.11	43.4786	180633		971	2326.69	1896.43	57.3785	340994
972	1744.62	2476.6	45.5	91580		972	1908.3	2276.62	46.5	180511		972	553.093	2762.16	63.776	340988
973	1561.27	2605.44	56.5156	91552		973	2210.57	2018.43	34.5242	180373		973	738.151	3161.01	68.2945	340982
974	724.023	2274.66	70.5	91541		974	1961.23	2533.83	34.6436	180373		974	554.946	2822.79	37.6462	340887
975	365.663	2735.86	109.684	91523		975	2353.58	2073.26	50.3871	180341		975	743.93	3113.32	71.386	340734
976	423.02	2272.1	99.6327	91482		976	1859.88	2276.79	58.8015	180323		976	1236.33	2742.17	41.2891	340680
977	1643.01	2438.34	56.6203	91475		977	2161.24	2032.13	52.907	180304		977	586.223	3120.3	63.4629	340631
978	1684.86	2104.24	29.84	91452		978	2040.6	2393.82	76.3474	180303		978	1734.1	2666.48	34.5725	340625
979	1793.09	2049.04	61.8667	91419		979	727.025	2584.21	101.492	180117		979	2475.92	439.995	117.508	340541
980	478.27	2867.82	79.7302	91358		980	2327.01	2149.6	75.5222	180097		980	2412.88	2855.93	30.0368	340490
981	478.296	2413.62	108.395	91323		981	2158.19	2095.28	25.6607	179962		981	683.488	2966.22	40.864	340426
982	734.289	2037.02	126.2	91287		982	2305.76	2259.48	39.5258	179938		982	759.55	3059.76	28.7207	340376
983	881.639	2447.67	81.875	91272		983	1987.74	2452.26	32.6706	179866		983	571.06	3164.69	65.3103	340328
984	1051.92	2215.05	62.7833	91237		984	2258.07	2132.64	54.4215	179844		984	508.266	2829.66	43.9177	340296
985	923.962	2061.68	73.443	91235		985	548.198	2535.27	150.939	179806		985	2292.77	277.784	125.784	340294
986	1686.4	2367.22	45.7538	91232		986	1699.57	2338.02	67.5	179717		986	2305.98	457.83	82.3836	340142
987	1671.82	2260.3	36.2817	91227		987	2051.77	2375.22	39.5327	179712		987	2272.35	2025.45	61.7178	340121
988	570.519	2040.88	129.584	91212		988	2074.46	2310.59	34.7125	179624		988	679.659	2779.89	46.4729	339967
989	298.5	2633.96	73.087	91204		989	1814.73	2420.86	47.4545	179577		989	762.292	2787.12	65.6854	339909
990	359.048	2709.49	73.4578	91191		990	2039.85	2470.07	55.2418	179574		990	878.939	2745.18	63.4049	339849
991	691.118	2479.1	72.6129	91180		991	1903.77	2416.04	61.0657	179571		991	2054.41	2683.02	38.8562	339745
992	1386.55	2327.36	45.5733	91163		992	2182.18	2292.58	82.7849	179549		992	2405.43	350.333	90.1954	339626
993	584.032	2671.57	74.617	91117		993	2339.79	2055.92	43.2527	179531		993	611.655	2727.89	56.4622	339538
994	1847.31	2445.88	51.5065	91060		994	2164.38	2248.5	60.2368	179473		994	2293.33	433.367	80.7467	339526
995	590.462	2169.72	101.474	91036		995	924.63	2412.77	104.601	179439		995	2171.39	2848.5	19.3115	339488
996	459.488	2738.19	61.7209	91030		996	2226.04	2460.96	46.25	179397		996	2318.29	312.647	126.827	339485
997	1931.39	2065.03	40.1818	90988		997	2197.39	2051.98	57.6916	179308		997	492.992	2721.84	47.5966	339448
998	862.76	2245.34	112	90987		998	776.203	2224.58	150.709	179297		998	495.116	2879.53	62.0137	339444
999	426.264	2164.83	124.189	90951		999	2557	987.249	198.584	179278		999	2000.79	2836.49	18.875	339326
1000	1670.15	2379.64	36.1475	90947		1000	964.983	2235.45	148.992	179259		1000	1229.32	2756.44	56.8671	339270
1001	684.043	2407.87	79.5072	90897		1001	1044.99	2462.67	112.727	179197		1001	2063.59	365.677	108.323	339182
1002	841.653	2007.59	111.373	90888		1002	2018.44	2289.4	73.0741	179187		1002	560.551	3245.39	58.7215	339106
1003	983.966	2064.93	88	90886		1003	832.495	2537.05	115.236	179079		1003	2518.63	552.045	94.4916	339078
1004	569.843	2095.02	137.193	90819		1004	1963.24	2246.34	74.4937	179029		1004	1210.55	2677.56	33.7299	338925
1005	399.47	2214.2	102.458	90815		1005	2362.01	2005.63	41.5735	179022		1005	2425.29	2238.71	62.4847	338824
1006	1537.38	2336.22	49.3875	90777		1006	2035.4	2389.86	46.1143	178930		1006	486.352	2944.31	53.1803	338806
1007	418.702	2173.46	109.731	90766		1007	2114.37	2042.18	42.4902	178909		1007	2262.35	807.964	101.228	338755
1008	508.99	2458.1	114.408	90761		1008	671.625	2547.22	130.758	178902		1008	1121.71	2885.89	55.8042	338735
1009	743.186	2300.9	76.6392	90751		1009	2278.33	1991.62	32.2857	178869		1009	679.453	2850.76	53.8647	338639
1010	1228.97	2121.09	46.3276	90727		1010	1899.02	2269.1	74.4138	178820		1010	2427.97	660.79	105.403	338581
1011	427.149	2494.61	102.552	90691		1011	2678.26	947.01	211.546	178737		1011	893.16	2840.02	68.0062	338560
1012	637.73	2784.28	62.5405	90663		1012	2285.55	2177.5	51.4459	178610		1012	2171.22	534.664	98.7123	338552
1013	802.389	2022.97	92.1895	90654		1013	1983.77	2337.26	48.567	178605		1013	502.776	2698.78	52.6014	338478
1014	855.511	2046.55	74.8298	90636		1014	2049.35	2378.41	55.5541	178568		1014	761.398	3070.9	37.0619	338478
1015	409.571	2858.7	83.0649	90604		1015	2333.34	2120.76	22.6822	178562		1015	970.659	2800	56.2045	338304
1016	812.431	2248.88	113.588	90597		1016	2200.25	2411.27	42.5158	178557		1016	2465.78	1539.07	73.5153	338267
1017	476.276	2181.09	103.197	90552		1017	1960.42	2285.91	49.6848	178552		1017	2214.99	359.873	125.924	338239
1018	1131.02	2117.24	50.1163	90545		1018	2095.73	2051.85	70.9278	178542		1018	1298.62	2773.37	46.4118	338193
1019	796.535	2676.55	78.4186	90541		1019	1087.82	2089.54	150.427	178489		1019	1585.89	2710.31	26.25	338171
1020	1966.64	2102.03	33.5408	90526		1020	2160.06	1989.65	38.525	178434		1020	2079.23	357.819	111.699	338167
1021	1013.97	2081.01	88.1154	90524		1021	629.74	2227.84	137.32	178345		1021	732.819	3165.63	46.2536	337990
1022	724.375	2401.46	96.55	90523		1022	1859.77	2360.93	44.8298	178339		1022	809.865	3003.98	70.6235	337801
1023	964.82	2357.18	78.5574	90515		1023	1652.58	2296	66.1447	178298		1023	1012.83	2962.25	61.6243	337770
1024	1010.48	2374.3	59.506	90509		1024	706.279	2536.62	127.382	178260		1024	1410.51	2801.41	30.5753	337753
1025	1862.52	2022.24	41.038	90417		1025	934.538	2139.78	165.601	178192		1025	544.261	3301.63	57.2364	337544
1026	1470.72	2113.97	78.4348	90391		1026	2056.27	2288.87	56.5181	177983		1026	2410.59	562.036	78.1333	337536
1027	1135.98	2061.3	63.3036	90378		1027	2001.89	2315.8	52.5119	177973		1027	721.189	3150.9	38.5676	337459
1028	649.303	2802.26	85.4079	90371		1028	1275.9	2307.41	105.354	177948		1028	2524.31	2707.66	35.7357	337450
1029	413.894	2344.79	117.745	90361		1029	1093	2228.17	154.828	177935		1029	562.826	2870.88	41.0311	337318
1030	731.111	1980.58	99.0123	90339		1030	767.056	2379.55	129.486	177878		1030	563.46	2887.3	66.292	337257
1031	642.857	2456.41	96.5934	90311		1031	2338.56	2074.27	39.7955	177876		1031	2362.69	554.691	119.154	337150
1032	1480.55	2628.51	67.3188	90306		1032	1729.32	2338.38	64.5154	177813		1032	871.285	2848.17	78.5645	337100
1033	1013.81	2136.4	56.4384	90305		1033	2047.4	2335.92	46.0824	177799		1033	717.084	3232.98	63.4122	336891
1034	976.821	2065.7	69.8209	90297		1034	664.109	2618.49	105.297	177684		1034	2326.3	1118.76	81.8289	336860
1035	944.831	1972.86	111.506	90281		1035	1867.86	2449.81	56.6438	177636		1035	1542.74	2601.92	23.8095	336813
1036	559.906	2229.61	104.854	90281		1036	1658	2341.36	74.4953	177619		1036	866.654	3111.53	57.6346	336799
1037	1888.89	2120.31	48.6389	90265		1037	2259.12	2127.89	22.9608	177610		1037	731.115	3184.11	67.1475	336788
1038	446.705	2461.9	100.564	90250		1038	939.899	2486.55	127.193	177551		1038	751.841	3217.29	60.6304	336737
1039	1367.4	2535.19	62.4545	90224		1039	2426.72	2210.62	42.4342	177538		1039	2215.21	509.571	111.441	336726
1040	1589.8	2599	63.8182	90147		1040	2315.67	1997.48	23.3488	177537		1040	715.05	3152.98	46.2571	336664
1041	696.884	2207.51	75.9302	90117		1041	2225.5	2090.73	60.4563	177397		1041	743.173	2828.35	46.3727	336652
1042	547.671	2740.15	78.0274	90056		1042	654.279	2285.36	140.879	177383		1042	821.208	2994.32	38.698	336397
1043	1943.87	2591.19	53.6154	90029		1043	2258.9	2111.3	38.4935	177375		1043	1621.88	2529.6	36.0791	336381
1044	1118.42	2247.93	57.5979	89980		1044	1859.39	2347.04	72.2	177347		1044	2329.16	1155.31	85.8135	336322
1045	811.557	2382.21	70.3286	89979		1045	2225.27	2343.49	42.6667	177322		1045	2046.26	388.98	84.1757	336286
1046	682.197	2325.03	89.4605	89963		1046	1643.46	2419.4	95.2063	177313		1046	617.696	2934.34	63.9275	336283
1047	557.514	2647.25	99.1111	89949		1047	1777.17	2334.96	56.5309	177269		1047	2299.74	2847.5	22.464	336199
1048	418.306	2229.56	86.1935	89876		1048	1985.83	2418.51	58.4359	177245		1048	2448.5	1575.07	71.9205	336161
1049	1874.02	2063.6	43.6667	89863		1049	883.792	2213.09	165.326	177227		1049	2154.98	433.713	111.246	336150
1050	1978.11	2131.36	41.2576	89842		1050	2188.49	2291.32	64.8085	177204		1050	2372.5	294.659	108.81	336012
1051	803.697	2323.42	71.6061	89797		1051	760.174	2107.93	134.148	177181		1051	590.53	3254.75	68.302	335861
1052	661.594	2100.23	89.5217	89797		1052	1832.4	2375.03	47.4045	177138		1052	813.135	2858.2	50.1706	335756
1053	528.102	2711.41	80.339	89796		1053	2332.08	2087.72	48.5354	177037		1053	2155	2696.13	22.5147	335737
1054	1229.69	2335.84	56.5321	89790		1054	863.649	2277.2	143.59	177026		1054	2204.63	2837.01	24.0952	335688
1055	961	2167.54	102.403	89788		1055	2097.44	2306.43	78.0684	177002		1055	668.889	3042.58	34.8889	335620
1056	1350.73	2334.49	41.6269	89781		1056	560.542	2465.71	118.092	176972		1056	545.935	2966.73	64.1159	335615
1057	581.567	2632.66	95.5224	89779		1057	2143.84	2143.55	53.3426	176972		1057	2375.51	2702.74	25.0347	335611
1058	1249.23	2303.26	31.2807	89770		1058	1520.4	2388.45	66.9355	176777		1058	2096.87	328.994	94.9299	335535
1059	958.641	2119.86	69	89768		1059	1785.08	2337.37	65.8598	176751		1059	660.08	3261.2	60.84	335472
1060	745.487	2264.53	62.5256	89745		1060	2188.45	2304.15	55.4592	176728		1060	2053.76	420.416	98.9017	335465
1061	1719.08	2577.98	52.2222	89724		1061	2234.19	1905.14	51.0127	176649		1061	845.783	2903.84	65.012	335443
1062	720.39	2822.58	92.678	89687		1062	2352.13	1978.57	54.6098	176626		1062	2029.1	2832.26	20.6091	335402
1063	1017.72	2013.49	74.4598	89633		1063	753.404	2371.73	124.936	176584		1063	774.272	2972.68	41.5	335398
1064	1394.82	2309.68	33.4118	89595		1064	847.925	2073.83	165.947	176537		1064	2242.73	2676.02	40.0828	335365
1065	326.746	2665.1	78.3729	89548		1065	2131.22	2325.82	82.7328	176371		1065	2526.15	481.493	83.9104	335358
1066	1711.19	2569.84	44.6812	89545		1066	2626.3	875.503	212.286	176322		1066	1062.53	2894.06	69.7857	335231
1067	1388.34	2500.34	66.625	89545		1067	1986.2	2328.55	53.1404	176260		1067	2490.88	500.595	81.8889	335192
1068	1878.4	2230.29	55.5256	89524		1068	2137.87	2372.3	45.9565	176232		1068	945.582	3021.77	66.9452	335190
1069	389.443	2219.24	104.466	89516		1069	511.381	2481.88	131.261	176133		1069	1656.37	2758.22	29.8112	335166
1070	749.886	2327.49	63.5443	89497		1070	2225.22	2177.49	57.0776	176101		1070	1444.95	2722.73	39.7796	335103
1071	340.168	2443.92	93.4159	89477		1071	2150.53	2178.85	64.2605	176086		1071	845.079	3094.2	48.9758	335095
1072	943.125	2393.27	95.3036	89458		1072	1560.18	2478.74	56.9375	176042		1072	1552.01	2611.75	31.9737	335088
1073	1794.39	1973.24	73.7639	89456		1073	2255.54	1922.6	55.0185	176016		1073	2161.7	414.418	104.449	335005
1074	1420.54	2513.86	54.5054	89454		1074	2252.78	2446.68	44.9237	175906		1074	715.681	2868.21	39.8188	334851
1075	591.042	2818.15	84.3229	89450		1075	1754.56	2278.64	62.7103	175838		1075	536.438	3113.14	44.0822	334834
1076	1277.67	2159.91	37.5116	89413		1076	2131.5	2254.06	60.0211	175838		1076	2142.88	434.222	112.265	334729
1077	1345.36	2288.47	61.2288	89394		1077	1840.7	2372.28	65.5517	175822		1077	443.11	2811.31	62.9416	334579
1078	1767.08	2178.56	50.6901	89394		1078	2112.74	2417.04	65.2717	175773		1078	719.605	2773.04	56.0672	334570
1079	1963.92	2138.53	35.5125	89367		1079	2230.42	1948.47	33.506	175706		1079	404.073	2957.75	55.4637	334487
1080	716.426	2211.23	90.3279	89314		1080	736.694	2533.63	129.471	175627		1080	895.403	2902.39	39.6996	334422
1081	556.186	2822.76	87.4143	89310		1081	2191.13	2321.36	48.028	175626		1081	601.877	2934.42	66.0675	334339
1082	453.429	2522.2	66.5165	89294		1082	846.385	2555.49	114.932	175625		1082	2479.26	1914.54	53.4843	334279
1083	1295.02	2343.77	29.4032	89269		1083	887.494	2323.73	163.253	175623		1083	2438.32	475.534	101.18	334216
1084	1646.32	2390.75	62.8491	89251		1084	2243.38	1946.07	31.4211	175529		1084	1348.47	2777.68	40.2133	334206
1085	1797.98	2058.45	28.6531	89234		1085	2043.08	2205.26	50.58	175495		1085	2186.1	386.046	95.1098	334194
1086	893.636	2013.36	99.4697	89171		1086	774.621	2468.95	126.874	175482		1086	1060.2	2881.25	63.9171	334123
1087	419.523	2861.17	90.5	89170		1087	2221.21	2275.23	82.5327	175398		1087	2266.24	583.366	83.9448	334057
1088	1269.73	2167.44	76.4815	89166		1088	2045.4	2235.74	60.9189	175342		1088	2468.06	545.457	113.882	333938
1089	1374.82	2165.78	37.3077	89016		1089	2211.04	1944.57	33.4565	175339		1089	2229.12	456.331	81.2828	333838
1090	963.753	2472.7	68.4444	89012		1090	2194.98	1949.28	57.0424	175280		1090	2554.57	431.369	106.05	333770
1091	737.236	2369.67	106.472	88970		1091	1029.67	2425.01	106.602	175251		1091	844.194	2954.99	34.482	333725
1092	581.861	2724.54	86.5	88967		1092	1710.07	2358.72	66.5783	175242		1092	707.152	3193.46	58.1739	333716
1093	1504.51	2058.1	80.4231	88913		1093	885.589	2286.46	156.841	175183		1093	1222.36	2809.94	58.9929	333697
1094	1699.72	2292.72	28.3607	88891		1094	2228.8	2455.45	52.1354	175182		1094	727.66	3026.43	26.934	333643
1095	356.288	2195.35	83.1125	88848		1095	2020.66	2416.15	37.125	175178		1095	2520.97	2716.73	29.9474	333625
1096	1166.48	2232.37	60.7258	88840		1096	2159.07	1976.33	55.5111	175156		1096	831.593	3079.63	38.5133	333606
1097	1291.18	2118	82.6909	88835		1097	2184.11	2238.47	65.5417	175147		1097	518.678	3063.8	40.6186	333585
1098	1925.24	2752.01	69.2101	88814		1098	711.775	2274.09	135.075	175071		1098	500.359	2837.25	52.6107	333566
1099	988.054	2391.84	83.75	88783		1099	2077.47	2285.61	80.8015	175016		1099	1254.74	2613.79	46.2018	333564
1100	618.187	2544.35	77.52	88782		1100	1775.18	2381.47	58.3776	174946		1100	2410.21	336.014	109.615	333442
1101	1483.82	2651.64	65.9286	88752		1101	2209.2	2240.84	69.4688	174924		1101	971.566	2911.34	37.3689	333431
1102	972.946	2397.04	61.4054	88739		1102	1768.96	2315.95	58.589	174908		1102	890.156	3009.19	44.6741	333409
1103	823.407	2340.24	83.4419	88735		1103	2141.26	2347.13	65.0556	174891		1103	2200.89	344.322	99.2752	333355
1104	1688.98	2463.85	38.4272	88718		1104	1959.15	2298.65	41.0842	174830		1104	657.856	2896.57	57.023	333335
1105	837.247	1993.28	104.506	88712		1105	1768.21	2387.46	40.8095	174797		1105	2191.1	462.275	86.1477	333272
1106	1746.01	2113.66	62.4545	88669		1106	2280.1	1976.02	37.5333	174716		1106	1032.54	2799.14	35.3529	333247
1107	1470.51	2257.33	51.48	88668		1107	1504.69	2490.24	62.5349	174712		1107	678.826	3046.39	64.9621	333247
1108	1347.77	2248.32	81.8833	88642		1108	1795.7	2278.38	50.5079	174704		1108	523.342	2700.48	56.0592	333206
1109	971.951	2262.38	95.549	88620		1109	877.363	2449.23	120.488	174691		1109	1222.32	2777.86	44.8346	333081
1110	1510.6	2130.31	38.475	88612		1110	1781.49	2495.12	52.1129	174652		1110	867.628	2971.14	62.9122	333077
1111	1443.3	2130.09	48.375	88594		1111	2027.63	2368.16	52.2388	174545		1111	2430.26	559.405	119.214	333019
1112	1592.96	2330.28	28.5075	88583		1112	1115.71	2072.43	134.166	174505		1112	2130.25	491.602	84.1667	333019
1113	325.178	2558.69	101.111	88544		1113	1862.31	2554.14	42.4578	174490		1113	997.852	2970.24	71.3352	333017
1114	1419.49	2335.6	37.5435	88537		1114	2011.55	2322.85	50.1042	174464		1114	2223.52	393.124	95.212	332996
1115	2012.83	2351.31	60.6034	88536		1115	627.054	2355.82	136.081	174464		1115	1029	2893.8	59.2517	332927
1116	1980.13	2204.37	46.1667	88506		1116	1985.86	2256.33	63.5	174426		1116	2401.88	2731.49	25.8229	332844
1117	854.123	2063	101.466	88479		1117	611.019	2545.57	107.969	174373		1117	2187.79	507.546	98.9483	332791
1118	1385.91	2195.07	47.5625	88457		1118	1851.51	2522.31	43.5181	174355		1118	762.548	3142.75	73.5987	332756
1119	970.72	1990.13	95.4624	88457		1119	2172.17	2054.68	40.5	174354		1119	898.749	3015.64	67.1444	332703
1120	1328.9	2394.9	62.2097	88453		1120	2131.37	2398.53	56.637	174292		1120	904.026	2920.95	37.3621	332649
1121	897.756	2018.33	123.523	88452		1121	2160.5	2343.47	55.1176	174215		1121	2356.4	2862.83	49.3812	332617
1122	1413.18	2409.01	39.6269	88443		1122	2234.31	1810.1	72.3543	174209		1122	2190.49	2731.72	41.6826	332614
1123	445.68	2336.3	83.5082	88416		1123	2347.39	2171.75	22.4886	174185		1123	2130.18	489.335	88.4294	332600
1124	1044.57	2113.09	67.4923	88384		1124	1114.45	2183.33	147.32	174156		1124	2177.78	532.5	112.046	332549
1125	887.802	2247.21	74.3086	88341		1125	1795.68	2284.69	66.3455	174150		1125	646.158	3157.35	56.3453	332497
1126	1244.91	2004.87	62.4808	88325		1126	2048.48	2294.08	67.5146	174113		1126	2188.18	569.718	85.5593	332405
1127	590.375	2228.07	72.6071	88306		1127	1963.12	2308.43	71.0417	174087		1127	907.736	2856.29	38.5286	332375
1128	550.344	2614.95	101.721	88304		1128	1745.26	2387.71	49.157	174073		1128	670.979	3337.6	65.4362	332333
1129	1685.84	2384.16	45.3247	88286		1129	2061.69	2240.82	62.2126	174071		1129	2504.66	1717.71	61.8716	332277
1130	671.598	2783.96	82.1951	88220		1130	2279	2231	82.9068	174038		1130	886.887	2997.04	39.6352	332251
1131	1591.14	2041.89	77.4521	88219		1131	1901.15	2347.84	39.55	173967		1131	528.174	2912.69	44.8347	332022
1132	460.292	2361.43	61.4583	88218		1132	1630.18	2480.51	62.3684	173929		1132	2489.58	2179.34	56.7791	331952
1133	1779.94	2181.76	30.6735	88209		1133	2163.74	2193.73	80.6754	173896		1133	2530.76	2487.73	68.5827	331915
1134	1011.3	2166.51	65.475	88177		1134	1873.46	2368.82	64.0866	173894		1134	2463.4	507.852	84.679	331859
1135	1380.88	2531.87	77.6667	88173		1135	2194.77	2089.13	68.2394	173814		1135	2330.18	1084.68	79.9026	331809
1136	1787.21	2085.2	38.4615	88162		1136	1087.05	2379.58	148.731	173774		1136	617.656	2844.96	68.5	331693
1137	1504.23	2215	65.6316	88160		1137	1207.24	2114.81	137.101	173760		1137	2160.22	310.935	104.384	331648
1138	656.953	2924.7	83.6719	88149		1138	2063.48	2266.81	55.4632	173744		1138	2353.5	350.475	91.7278	331635
1139	799.617	1981.58	86.7664	88104		1139	752.244	2567.74	111.215	173743		1139	1458.97	2688.37	28.2045	331429
1140	803.821	2200.1	69.0769	88102		1140	846.872	2179.85	161.215	173741		1140	830.126	3179.43	52.1368	331397
1141	1305.13	2139.78	40.375	88094		1141	2142.82	2032.6	58.9231	173665		1141	1177.26	2846.54	40.457	331375
1142	2034.63	2323.57	41.5596	88089		1142	2120.25	2320.08	54.4247	173658		1142	1196.97	2758	52.3147	331369
1143	605	2753.1	78.6438	88065		1143	1846.81	2294.44	86.5309	173645		1143	466.455	2784.37	64.7015	331319
1144	637	2147.43	106.486	88054		1144	691.473	2552.25	119.078	173579		1144	540.521	3291.65	55.8286	331260
1145	1698.18	2101.92	50.5376	88015		1145	882.757	2555.6	120.734	173540		1145	606.273	3267.71	62.1515	331251
1146	2044.74	2197.28	43.6296	88010		1146	2079.01	2274.07	78.1791	173525		1146	873.02	3067.85	73.1569	331241
1147	1066.64	2197.42	48.5217	87963		1147	2302.82	2412.64	47.4602	173521		1147	751.321	3054.07	61.2044	331197
1148	731.42	2564.98	72.3704	87962		1148	2266.15	2343.58	75.5062	173492		1148	2037.67	2765.11	20.0588	331176
1149	744.458	2495.08	62.2203	87959		1149	1802.53	2290.29	65.7664	173479		1149	1699.84	2722.18	29.2013	331119
1150	513.7	2518.56	61.78	87954		1150	1668	2313.79	77.5214	173452		1150	635.72	3256.37	56.4067	331102
1151	663.241	1988.09	114.87	87948		1151	1819.38	2410.18	60.2427	173303		1151	2607.63	2662.23	66.013	331095
1152	492.434	2432.9	60.6867	87948		1152	1947.26	2378.93	51.5514	173291		1152	638.938	2855.99	45.2014	331089
1153	496.812	2129.3	90.0703	87946		1153	2587.08	839.121	208.492	173207		1153	2265.21	304.04	99.0265	331054
1154	433.13	2527.91	88.6667	87944		1154	2247.12	1975.25	46.427	173190		1154	1638.17	2672.56	30.7899	331038
1155	1778.05	2565.88	45.1951	87923		1155	2166.69	2027.01	24.5972	173170		1155	862.459	3034.76	39.8239	331008
1156	306.683	2176.47	110.983	87869		1156	2064.18	2382.53	93.7541	173134		1156	550.178	2712.8	62.3488	330897
1157	795.515	2126.8	101.515	87859		1157	1633.54	2465.72	48.55	173095		1157	2264.77	700.671	94.0898	330558
1158	770.606	1990.5	82.5152	87849		1158	1617.51	2417.23	47.6214	172987		1158	2128.72	264	110.711	330532
1159	1950.73	2566.22	73.551	87847		1159	1268.19	2295.56	100.069	172975		1159	2134.01	568.57	109.925	330453
1160	567.494	2240.27	92.2022	87809		1160	2338.38	2224.16	66.9182	172967		1160	1447	2737.02	28.9322	330362
1161	1525.31	2573.14	53.4906	87771		1161	2125.46	1954.36	69.7946	172935		1161	2004.34	453.026	97.75	330358
1162	774.678	2223.86	78.5778	87761		1162	2090.35	2191.35	75.5619	172874		1162	882.989	2837.86	44.0625	330319
1163	1209.24	2210.07	50.3944	87736		1163	1648.11	2486.91	50.1616	172850		1163	2243.97	324.639	123.961	330304
1164	1799.24	2141.84	33.1857	87723		1164	1948.3	2320.21	61.8182	172805		1164	2407.45	509.041	85.0058	330245
1165	589.217	2561.19	83.3913	87714		1165	2160.9	2233.15	55.1831	172789		1165	790.789	2991.79	34.985	330192
1166	746.477	2317.06	71.4767	87695		1166	1709.16	2380.91	86.3667	172737		1166	2164.49	523.089	89.8987	330187
1167	1081.37	2141.67	73.5357	87695		1167	2415.08	2169.47	38.964	172670		1167	960.821	2767.15	45.6423	330053
1168	1933.1	2109.67	29.5233	87691		1168	724.933	2536.72	103.149	172571		1168	408.404	2777.66	56.5674	329977
1169	418.791	2229.15	82.7253	87680		1169	2214.34	2400.62	47.5042	172541		1169	2308.55	2061.24	66.7083	329639
1170	1366.51	2340.59	38.5	87679		1170	2399.91	2237.95	54.8447	172533		1170	2414.88	515.367	116.311	329552
1171	1786.03	1979.09	67.6119	87672		1171	740.087	2528.84	125.353	172432		1171	1783.58	2648.87	27.7043	329529
1172	662.342	2031.88	100.507	87672		1172	2304.65	2364.88	48.3824	172426		1172	1330.94	2768.99	42.7671	329430
1173	744.765	2298.65	104.469	87644		1173	1146.88	2164.62	124.075	172414		1173	538.76	2919.26	55.1173	329331
1174	394.521	2552.73	79.5342	87623		1174	1471.5	2381.73	72.8291	172361		1174	2299.65	435.905	115.716	329320
1175	617.033	2069.98	94.5495	87615		1175	2150.16	2420.16	45.1084	172324		1175	1977.13	2824.45	17.3636	329317
1176	1924.14	2612.82	58.6111	87607		1176	2010.89	2307.87	42.9828	172318		1176	695.882	2737.91	69.0694	329308
1177	946.18	2404.58	87.6978	87605		1177	931.541	2108.96	158.851	172289		1177	765.479	2774.39	51.9437	329175
1178	1622.29	2441.5	36	87604		1178	2178.13	1524.44	99.8725	172176		1178	1111.61	2820.36	57.0331	329119
1179	571.106	2963.3	85.0426	87599		1179	928.029	2283.55	126.276	172162		1179	734.816	2755.98	56.896	329057
1180	1284.38	2400.69	37.6154	87574		1180	1977.77	2379.44	49	172101		1180	2052.98	450.348	93.0758	329043
1181	1517.8	2613.39	66.3469	87560		1181	747.5	2286.41	126.233	172083		1181	824.088	3134.21	43.5074	329016
1182	870.349	2532.16	70.2698	87532		1182	1032.18	2116.91	124.608	172051		1182	522.798	2865.98	48.3387	329011
1183	549.027	2284.21	87.2667	87529		1183	2227.09	1779.31	77.7797	172019		1183	2200.88	560.581	87.0129	328993
1184	1331.77	2220.17	44.8795	87512		1184	2163.5	2048.81	43.2202	172018		1184	2430.29	2701.63	55.6223	328850
1185	1168.84	2190.76	43.5795	87511		1185	2105.64	1501.3	105.248	172011		1185	2639.14	2723.59	70.5862	328826
1186	420.493	2473.82	82.5479	87505		1186	932.438	2091.12	164.053	171870		1186	1156.93	2714.15	57.9676	328740
1187	2105.75	2394.98	44.4239	87456		1187	2107.79	2110.21	51.0161	171802		1187	2473.08	2776.18	43.875	328685
1188	2635.22	2672.58	123.944	87453		1188	2306.25	1889.56	81.5263	171749		1188	1655.49	2726.55	24.5873	328659
1189	488.391	2782.14	70.3281	87447		1189	1688.63	2441.61	102.358	171660		1189	2312.17	1095	81.1796	328501
1190	1166.32	2090.46	67.7193	87441		1190	1822.01	2325.11	63.6211	171657		1190	736.19	2791.73	41.4463	328472
1191	638.382	2766.53	66.3235	87436		1191	2042.59	2386.09	48.9767	171641		1191	2445.32	1851.7	61.2717	328432
1192	1757.77	2039.26	69.1286	87436		1192	2299.57	2067.53	37.8605	171578		1192	2530.55	2664.67	56.2615	328414
1193	460.632	2767.54	70.6316	87431		1193	2524.75	1098.95	214.208	171577		1193	2299.66	1431.52	72.5191	328223
1194	1052.59	2345.96	95.9012	87428		1194	1955.2	2371.66	87.8529	171574		1194	2403.63	524.698	88.9763	328194
1195	583.222	2582.5	84.7037	87407		1195	694.669	2191.02	137.115	171548		1195	2315.22	412.405	85.0763	328194
1196	689.96	2181.06	78.4646	87372		1196	1973.09	2411.69	91	171537		1196	2435.44	336.304	112.478	328148
1197	487.338	2561.96	64.4156	87360		1197	2386.31	2219.73	50.8165	171530		1197	1662.49	2693.71	26.5122	328145
1198	414.783	2403.3	67.0241	87357		1198	1657.67	2286.81	70.875	171497		1198	1847.6	2635.9	28.7574	328137
1199	562.011	2656.85	100.191	87340		1199	2139.96	2267.21	54.0288	171475		1199	2135.92	392.385	83.9944	328122
1200	878.939	2059.62	69.5606	87307		1200	509.68	2501.78	119.8	171440		1200	1168.31	2798.51	46.7956	327969
1201	1973.25	2436.03	47.575	87272		1201	2007.31	2427.09	53.2687	171413		1201	591.172	2675.66	60.9569	327964
1202	554.6	2762.48	67.3	87262		1202	2022.82	2268.12	51.2	171392		1202	1667.54	2624.5	31.8271	327964
1203	641.39	2363.78	80.961	87199		1203	1572.43	2306.89	67.494	171360		1203	1641.86	2678.32	39.2581	327930
1204	361.093	2202.94	79.4884	87133		1204	691.816	2369.78	161.178	171338		1204	2231.87	292.867	121.526	327919
1205	1397.21	2088.25	61.2917	87099		1205	1589.12	2453.67	58.5604	171274		1205	579.963	2812.06	46.0147	327897
1206	881.176	2442.08	78.7059	87081		1206	1845.43	2416.62	96.4872	171206		1206	2375.76	480.739	116.888	327805
1207	1777.2	2353.29	44.6364	87032		1207	1994.28	2312.2	94.945	171197		1207	1414.94	2772.31	22.0216	327787
1208	533.3	2343.9	76.825	87010		1208	2165.94	2138.87	56	171148		1208	1688.27	2585.3	39.5065	327770
1209	883.816	1946.25	94.5132	87004		1209	1981.3	2273.28	53.4086	171136		1209	860.535	3018.84	37.8915	327758
1210	1610.06	2333.18	40.5	86996		1210	1004.33	2346.91	122.168	170992		1210	2171.25	360.16	90.1	327724
1211	294.27	2613.5	83.36	86977		1211	1877.04	2356.47	61.82	170965		1211	655.186	3093.41	43.5641	327661
1212	846.598	2181.16	113.5	86909		1212	2025.18	2507.7	34	170836		1212	2500.46	2541.5	70.3027	327602
1213	1026.06	2091.31	60.3803	86888		1213	2146.37	2061.17	31.573	170819		1213	1265.27	2666.7	40.082	327502
1214	705.937	2866.89	91.5823	86877		1214	1977.37	2315.74	62.5921	170800		1214	821.76	3071.18	43.26	327482
1215	418.68	2516.31	57.5979	86875		1215	2075.79	2264.61	70.5567	170782		1215	1029.83	2939.89	49.7886	327417
1216	534.012	2073.72	131.537	86862		1216	2085.89	2413.99	48.4944	170737		1216	2441.51	1201.43	95.8593	327366
1217	419.921	2298.12	100.395	86859		1217	1902.25	2371.57	94.0833	170688		1217	673.887	2829.41	55.8933	327307
1218	437.219	2574.58	72.5205	86799		1218	1842.85	2349.03	72.5263	170668		1218	2284.15	435.363	122.731	327296
1219	1817.28	2298.75	42.381	86789		1219	2001.88	2232.64	55.0072	170656		1219	569.492	2843.1	37.5231	327293
1220	1259.27	2248.77	49.5256	86760		1220	1029.31	2199.02	164.478	170640		1220	2154.5	2666.17	19.2681	327157
1221	1044.22	2088.04	64	86731		1221	1337.26	2297.24	98.3955	170600		1221	831.418	2797.89	71.4184	327121
1222	1072.89	2377.08	58.5979	86727		1222	945.794	2526.88	97.0476	170583		1222	2240.64	375.758	91.025	326973
1223	1028.83	2058.64	57.8286	86727		1223	609.974	2481.54	144.034	170551		1223	1336.77	2688.21	55.446	326951
1224	1546.69	2216	75.7419	86715		1224	2156.88	2288.74	55.4125	170543		1224	2465.38	2030.64	55.288	326942
1225	1387.49	2105.87	63.2316	86703		1225	802.289	2482.13	126.691	170503		1225	2362.92	1575.29	66.6863	326940
1226	638.573	2215.47	93.4533	86702		1226	1926.45	2525.85	40.4125	170480		1226	779.845	2764.66	67.3818	326860
1227	883.015	2312.33	85.9701	86666		1227	2294.85	2201.61	56.4309	170382		1227	2361.43	2746.47	27.8087	326792
1228	380.338	2759.58	72.5195	86650		1228	936.304	2232.39	174.387	170378		1228	875.771	2860.44	76.0208	326680
1229	402.613	2484.92	61.96	86649		1229	1940.53	2373.89	51.8793	170325		1229	2492.52	1911.26	46.0138	326583
1230	1242.91	2036.71	60.1007	86634		1230	556.669	2553.84	111.347	170306		1230	2329.34	609.652	110.554	326578
1231	666.297	2373.2	102.281	86623		1231	1146.77	2387.07	120.925	170291		1231	794.023	3106.88	34.4419	326542
1232	588	2014.61	98.5125	86605		1232	2177.95	1991.51	90.2	170226		1232	596.695	2794.15	42.7053	326534
1233	461.82	2494.34	89.7213	86596		1233	1942.68	2315.68	63.5616	170224		1233	1570.65	2613.39	42.0714	326522
1234	292.573	2135.23	97.5122	86580		1234	2048.8	2308.96	48.0556	170161		1234	2497.78	2746.25	39.5729	326515
1235	1013.85	1988.26	105.436	86542		1235	2416.74	2063.02	50.4348	170097		1235	2451.67	447.842	89.9942	326437
1236	1251.89	2370.06	35.4625	86535		1236	2151.19	2345.22	50.5229	170043		1236	1368.33	2744.06	27.537	326271
1237	1017.82	2294.38	92.519	86507		1237	947.958	2500.98	116.741	170011		1237	1645.34	2703.51	30.7297	326265
1238	658.743	2182.91	70.3857	86467		1238	682.417	2434.47	118.288	170005		1238	2340.01	2725.88	48.7763	326208
1239	262.747	2199.07	91.5055	86460		1239	804.212	2376.88	121.036	169864		1239	2137.2	434.471	83.8387	326179
1240	470.418	2887.69	94.7143	86393		1240	2043.41	1390.27	133.603	169853		1240	2120.99	2718.96	13.9917	326141
1241	1984.19	2349.06	38.5556	86346		1241	2328.08	1920.09	43.5541	169840		1241	642.787	2918.13	28.2	326126
1242	799.086	2612.49	95.4	86344		1242	2057.45	2296.68	103.479	169829		1242	2573.38	472.821	110.696	325931
1243	1060.64	2212.73	63.8571	86318		1243	2419.83	2197.17	46.4653	169822		1243	2322.3	323.785	91.1556	325865
1244	882.451	2060.94	94.5634	86303		1244	1088.74	2054.34	145.013	169678		1244	535.598	2815.31	59.4646	325852
1245	1605.32	2100.3	59.4815	86290		1245	1830.06	2279.83	50.4028	169672		1245	2200.46	412.883	121.041	325824
1246	1528.4	2633.01	65.5926	86278		1246	1690.58	2283.7	57.5811	169644		1246	2529.88	391.532	116.655	325603
1247	1184.83	1982.77	70.5652	86275		1247	1747.12	2404.52	59.9609	169617		1247	1374.89	2735.27	35.3757	325559
1248	1833.34	2026.88	45.625	86253		1248	838.904	2250.99	173.836	169610		1248	753.958	2898.86	36.8403	325530
1249	1774.76	2085.4	54.5769	86246		1249	2048.31	2333.98	28.5309	169520		1249	593.525	3268.67	65.2187	325504
1250	534.61	2163.88	124.271	86237		1250	1885.81	2246.06	58.1122	169515		1250	952.581	2748.64	52.7519	325488
1251	489.69	2537.17	72.7586	86226		1251	2313.66	2373.54	43.3443	169444		1251	2340.07	598.711	109.079	325333
1252	1335.38	2244.46	32.4928	86213		1252	1779.71	2285.31	62.0609	169388		1252	1066.39	2810.39	35.7333	325300
1253	1659.43	2437.08	44.1024	86204		1253	994.034	2381.6	120.245	169342		1253	708.71	2957.55	54.8225	325276
1254	850.918	2160.55	78.4658	86199		1254	2081.17	2194.39	76.121	169310		1254	859.114	2978.47	40.9773	325265
1255	478.156	2188.82	78.7556	86168		1255	1839.85	2368.67	52.5366	169267		1255	2256.2	728.19	104.464	325145
1256	859.967	2299.23	100.35	86154		1256	2282.69	1982.7	53.4098	169065		1256	2072.06	487.9	90.0332	325053
1257	1462.96	2258.64	75.3	86136		1257	2205.35	1985.92	61.8182	169037		1257	675.299	3010.98	38.6929	325027
1258	512.321	2793.85	86.4198	86123		1258	1953.63	2421.82	75.5495	169033		1258	1440.58	2667.31	49.8974	324993
1259	1340.1	2035.91	47.5065	86122		1259	589.03	2659.77	98.0752	169026		1259	2346.68	329.22	93.72	324966
1260	377.598	2623.78	110.448	86122		1260	1942.55	2367.38	50.0263	168901		1260	2384.75	302.214	105.348	324823
1261	972.467	2347.25	59.65	86093		1261	2114.04	2194.88	78.6222	168885		1261	2469.77	433.593	108.67	324723
1262	869.662	2450.91	76.4054	86085		1262	2182.69	1684.66	98.1152	168810		1262	2480.21	345.948	104.848	324711
1263	1870.06	2031.85	43.75	86079		1263	1913.17	2379.99	63.9792	168732		1263	2119.83	483.166	100.462	324680
1264	1587.16	2254.93	32	86026		1264	1817.06	2373.43	47.5811	168670		1264	438.538	2839.2	59.4118	324654
1265	366.865	2243.74	85.3958	86017		1265	1892.74	2404.28	50.6923	168668		1265	558.872	2705.83	61.4527	324619
1266	2029.12	2685.31	61.5647	86017		1266	1123.8	2224.48	152.227	168653		1266	712.106	3206.7	61.0303	324569
1267	509.767	2605.83	82.9333	86013		1267	744.652	2202.91	137.667	168646		1267	2202.84	601.18	89.7923	324519
1268	718.786	2465.13	89.2571	85989		1268	1045.23	2411.87	119.404	168584		1268	2083.97	238.795	116.481	324487
1269	853.918	2284.1	78.5068	85973		1269	2089.78	2238.22	45.3864	168573		1269	643.906	3239.64	65.518	324466
1270	544.149	2375.32	116.218	85964		1270	2185.91	1966.67	56	168553		1270	2299.41	1447.18	83.0566	324345
1271	1353.29	2354.42	53.4487	85957		1271	2127.98	2231.3	77.1204	168550		1271	2283.38	1264.41	88.0427	324127
1272	1227.81	2082.04	53.6078	85954		1272	1771.53	2299.36	52.8235	168537		1272	998.87	2831.39	54.4427	324004
1273	558.262	2137.54	115.639	85943		1273	1820.16	2484.03	58.0299	168529		1273	511.083	2784.78	61.9241	323998
1274	1099.39	1988.54	91.7746	85943		1274	2282.9	2339.53	51.7372	168453		1274	1001.59	2959.16	67.9085	323997
1275	878.545	2127.44	79.5455	85911		1275	2272.45	2077.93	45.5263	168366		1275	2537.07	468.063	110.965	323994
1276	1846.99	2053.04	88.5063	85908		1276	1845.47	2464.29	41.5571	168253		1276	1028.05	2767.08	40.3831	323990
1277	1801.83	2223.14	62.6277	85905		1277	906.314	2192.6	154.592	168235		1277	2238.2	345.68	93.7938	323955
1278	1448.97	2349.66	36.6392	85893		1278	1147.96	2171.19	135	168199		1278	820.143	3082.45	61.3333	323891
1279	1061.5	2513.57	88.6351	85849		1279	561.223	2390.27	175.714	168161		1279	1888.62	2769.58	19.4918	323817
1280	806.587	2607.19	93.6032	85843		1280	1769.24	2288.19	73.5385	168127		1280	2339.55	2742.22	44.9385	323771
1281	727.377	2178.48	83.5455	85842		1281	2167.8	2128.86	60.7024	168101		1281	1835.1	2723.84	34.6222	323738
1282	834.038	2601.71	99.2692	85738		1282	2205.36	1861.72	56.3059	168019		1282	2572.99	572.852	100.838	323543
1283	1637.45	2130.72	65.6092	85737		1283	2182.92	1942.43	87.8814	167986		1283	2065.49	311.656	108.565	323479
1284	454.815	2509.86	105.615	85730		1284	2133.45	2434.48	71.5072	167960		1284	2048.71	545.177	97.2245	323415
1285	1027.46	2259.12	105.133	85717		1285	1729.47	2444.84	57.4133	167842		1285	2564.7	2721.43	62.0463	323405
1286	1578.05	1991.93	63.8909	85692		1286	2490.55	1098.53	187.083	167828		1286	662.53	3127.3	72.753	323391
1287	652.162	2712.19	64.5	85639		1287	2093.17	2160.38	64.5806	167728		1287	789.854	3196.46	57.3544	323279
1288	890.543	2375.28	84.4568	85632		1288	736.383	2536.26	110.24	167694		1288	879.667	2774.36	63.7727	323271
1289	662.907	2221.2	75.2933	85622		1289	1714.33	2519	50.0753	167683		1289	2759.8	2627.9	55.1361	323149
1290	1958.05	2096.88	37.3548	85580		1290	2521.45	938.873	183.46	167673		1290	1751.35	2661.6	41.9101	323097
1291	2268.3	2433.3	61.3944	85561		1291	2360.59	2121.45	51.4744	167661		1291	2306.08	353.739	110.039	323075
1292	306.625	2184.85	95.675	85510		1292	1840.91	2399.6	62.5556	167635		1292	1742.89	2686.22	35.8553	323029
1293	930.907	2489.88	78.1333	85467		1293	894.561	2590	93.9355	167592		1293	794.717	2922.12	36.6195	322947
1294	595.646	2587.85	81.6771	85442		1294	766.078	2384.1	125.078	167569		1294	2309.1	484.291	81.709	322907
1295	441.645	2470.41	90.3947	85405		1295	2127.18	2414.77	75.5	167555		1295	2353.36	2905.25	25.0611	322785
1296	1824.09	2067.81	34.234	85404		1296	1083.81	2431.69	102.944	167544		1296	1031.96	2882.9	71.9864	322782
1297	965.877	2315.63	86.3699	85403		1297	2696.19	865.202	217.442	167505		1297	1376.68	2717.78	36.8333	322781
1298	763.521	2488.93	82.1146	85394		1298	2134.71	2120.7	56.1754	167503		1298	1401.32	2651	45.7399	322765
1299	1546.2	2251.45	71.7959	85378		1299	907.769	2214.87	175.918	167476		1299	1037.68	2805.08	54.4876	322692
1300	1122.06	2203.24	59.6029	85358		1300	2143.72	1999.95	62.8247	167469		1300	2175.22	277.919	104.77	322687
1301	600.964	2884.49	79.7455	85354		1301	645.077	2425.69	132.814	167454		1301	740.106	2936.98	64.6138	322610
1302	1401.12	2382.04	67.5135	85344		1302	2076.72	2204.27	39.8319	167421		1302	2236.22	617.404	108.252	322507
1303	1750.88	1978.14	79.09	85343		1303	1775.92	2519.98	48.2473	167400		1303	1307.47	2741.22	44.9874	322466
1304	757.187	2558.41	76.56	85336		1304	1016.75	2302.25	113.034	167387		1304	2222.15	522.358	99.858	322438
1305	1229.63	2223.74	100.16	85324		1305	2363.96	2225	40.2429	167321		1305	911.02	2958.14	38.9338	322422
1306	1811.74	2459.02	43.4943	85323		1306	2582.59	972.551	202.443	167309		1306	2435.79	400.459	94.2842	322391
1307	814.904	2223.88	71.4699	85317		1307	2626.97	831.887	191.64	167204		1307	2224.52	618.974	84.1258	322344
1308	592.868	2642.77	65.4725	85300		1308	2175.4	2138.2	23.8929	167148		1308	2454.03	683.081	92.7297	322317
1309	1750.63	2269.86	37.3608	85300		1309	1990.78	2340.77	67.0345	167133		1309	540.36	3163.91	58.964	322310
1310	1159.89	2237.84	107.461	85286		1310	2732.97	812.271	183.953	167073		1310	1797.09	2627.64	34.9933	322300
1311	791.744	2453.22	71.4512	85285		1311	1841.95	2358.99	58.9872	167049		1311	2382.55	809.218	89.859	322266
1312	1667.09	2081.91	32.4	85278		1312	703.025	2325.72	141.936	167042		1312	1467.71	2582.46	35.1765	322221
1313	1594.81	2608.12	52.4545	85261		1313	1766.28	2469.39	52.9865	166984		1313	939.267	2829.39	37.9	322212
1314	803.783	2356.32	73.4203	85224		1314	2256.65	2027.39	46.5176	166970		1314	2165.71	2622.06	32.4972	322119
1315	584.471	2030.44	94.5286	85220		1315	1980.98	2281.78	65.7416	166865		1315	578.766	2805.98	50.6946	322118
1316	1197.47	2155.43	82.5325	85217		1316	737.412	2161.89	135.342	166791		1316	2264.74	256.8	110.629	322080
1317	1175.14	2206.28	45.525	85170		1317	2313.04	2358.27	53.3333	166747		1317	2499.65	1692.25	72.1154	321905
1318	1128.61	2041.75	93.4773	85151		1318	781.292	2508.85	129.118	166723		1318	643.13	3196.11	53.2987	321891
1319	594.052	2235.45	103.831	85129		1319	2129.54	2031.48	56.505	166700		1319	2432.71	622.614	86.8911	321839
1320	1858.92	2446.51	44.6981	85128		1320	1557.02	2392.65	70.1589	166578		1320	2098.5	366.687	90.4478	321782
1321	1306.72	2440.38	61.3529	85115		1321	981.417	2250.06	145.015	166568		1321	1658.95	2736.75	35.0909	321753
1322	1385.14	2217.91	30.5484	85107		1322	2173.34	1827.81	73.1504	166538		1322	717.49	2828.14	71.9085	321745
1323	1413.98	2342.66	43.4268	85099		1323	2630.43	877.174	202.329	166516		1323	2601.24	2486.65	45.6707	321740
1324	1785.96	2201.58	53.3919	85099		1324	2138.84	2311.38	83.9884	166500		1324	2489.68	2656.49	41.2478	321676
1325	403.903	2841.41	88.8447	85088		1325	2168.78	2291.92	51.5	166466		1325	2403.15	2584.38	71.9864	321651
1326	1564	2177.42	86.4778	85080		1326	2365.77	2411.2	53.3261	166406		1326	2187.99	448.67	94.5565	321624
1327	1945.32	2138.07	34.5658	85064		1327	1641.89	2354.83	63.2817	166372		1327	638.296	2870.46	37.449	321556
1328	1397.86	2205.08	30.6667	85045		1328	2072.97	2249.57	85.5402	166370		1328	2396.6	1839.36	55.2077	321416
1329	623.076	2048.58	90.3182	85040		1329	2133.54	1573.95	103.61	166347		1329	2314.38	1046.4	86.6705	321404
1330	826.147	2187.75	70.5733	85029		1330	1739.07	2318.11	54.2421	166283		1330	544.936	2764.06	46.8455	321386
1331	1395.45	2449.91	43.5256	85024		1331	591.526	2436.36	123.14	166239		1331	2383.48	495.197	82.7226	321358
1332	452.36	2443.89	98.8739	85002		1332	1829.74	2483.04	56.9434	166223		1332	1106.27	2886.5	50.9152	321171
1333	702.03	2524.02	78.6818	84994		1333	2329	2060.38	50.6066	166200		1333	842.067	3069.25	74.4352	321155
1334	1546.21	2175.52	52.5152	84990		1334	2009.02	2215.2	58.5811	166191		1334	2414.98	615.322	83.0452	321125
1335	1311.66	2420.25	64.9326	84969		1335	925.315	2109.06	131.5	166151		1335	2474.56	2324.9	53.1722	320965
1336	1705.8	2317.78	29.2	84923		1336	2519.49	1059.84	191.519	166128		1336	866.301	2997.7	61.5789	320887
1337	2041.24	2365.41	42.1727	84896		1337	2250.11	2140.64	30.8716	166075		1337	1352.63	2682.57	51.7161	320879
1338	1286.9	2285.72	56.5588	84894		1338	2291.94	2391.89	45.0633	166003		1338	2099.17	432.714	99.2755	320843
1339	1766.74	2317.79	37.1698	84871		1339	2372.91	2077.03	51.4947	165951		1339	1382.75	2603.4	23.1091	320838
1340	435.672	2290.43	99.6207	84860		1340	999.512	2333.85	136.545	165937		1340	836.046	2976.57	36.7099	320803
1341	1011.38	2237.43	76.4583	84833		1341	2269.11	1983.72	25.4699	165922		1341	2113.04	367.045	99.1518	320695
1342	1151.5	2557.75	82.3971	84831		1342	1742.04	2412.1	94.131	165908		1342	2560.4	553.052	103.644	320657
1343	465.394	2305.64	64	84785		1343	2088.09	2361.3	70.1398	165907		1343	930.263	2934.2	37.8644	320657
1344	544.08	2466.64	84.4483	84752		1344	2171.22	2108.09	56.3	165874		1344	1888.36	2688.04	32.7757	320651
1345	689.567	2115.9	106.925	84750		1345	1739.08	2402.02	63.8333	165868		1345	2120.97	468.638	82.8054	320648
1346	1263.12	2467.53	67.525	84718		1346	2261.57	2132.86	46.9474	165864		1346	2107.59	442.945	99.9695	320566
1347	739.67	2033.93	124.777	84709		1347	659.886	2588.46	117.786	165856		1347	2413.19	2826.75	19.98	320552
1348	687.793	2240.11	76.4828	84702		1348	744.333	2337.75	163.377	165839		1348	739.592	2962.56	65.7126	320545
1349	1324.15	2081.35	59	84701		1349	2177.01	2456.32	27.9829	165785		1349	2177.24	469.421	99.9649	320482
1350	1225.72	2310.66	47.8852	84700		1350	2146.23	2029.42	66.1532	165782		1350	1196.61	2682.66	51.0275	320414
1351	1392.26	2459.82	42.5341	84690		1351	1773.84	2347.55	62.9452	165750		1351	2469.54	2585.19	46.3471	320381
1352	882.667	2449.9	85.098	84625		1352	1947.76	2455.28	67.156	165701		1352	493.256	2784.13	51.1395	320354
1353	1479.71	2635.18	65.5968	84625		1353	1920.76	2302.97	87.0222	165683		1353	2360.64	356.64	85.528	320340
1354	1628.33	2454.93	37.2706	84612		1354	1635.04	2439.98	107.904	165678		1354	2129.3	395.603	94.1374	320319
1355	1381.36	2070.24	73.0172	84606		1355	1137.81	2143.69	121.051	165634		1355	2075.28	367.25	86.1319	320298
1356	1240.76	2019.16	59.8113	84600		1356	751.006	2178.84	142.012	165537		1356	611.286	3066.06	43.8367	320248
1357	1780.67	2115.86	38.8605	84590		1357	1804.94	2320.36	85.98	165453		1357	2281.48	2751.94	27.3611	320226
1358	913.903	2050.05	103.694	84580		1358	1910.35	2579.74	40.8125	165416		1358	2410.23	2568.25	55.5519	320188
1359	1994.34	2116.6	36.1343	84556		1359	2085.23	2194.51	30.5568	165396		1359	492.715	2831.41	58.9051	320151
1360	390.557	2687.02	81.8689	84544		1360	2161.54	1958.58	67.4198	165363		1360	649.654	3351.04	61.9	320137
1361	934.366	2310.25	63.7465	84530		1361	2380.01	2011.14	58.554	165346		1361	2535.15	509.695	114.225	320124
1362	451.13	2491.87	58.3478	84524		1362	724.248	2184.16	142.936	165301		1362	565.829	3097.35	49.5722	319944
1363	1075.06	2106.07	49.5319	84500		1363	717.778	2386.34	121.095	165194		1363	1144.25	2877.89	49.897	319943
1364	864.938	2267.88	63.7231	84493		1364	1870.02	2282.53	65.1694	165176		1364	1327.84	2613.42	37.6352	319840
1365	400.632	2736.85	73.9412	84492		1365	2202.91	2023.82	28.4342	165098		1365	2124.96	343.074	111.178	319837
1366	579.734	2669.81	67.6406	84447		1366	2144.52	2267.96	51.4615	165094		1366	2450.69	348.891	98.1749	319798
1367	1104.3	2056.87	60.5714	84422		1367	1966.83	2273.86	52.5437	165082		1367	2386.97	639.265	114.967	319596
1368	691.934	2612.7	98.5275	84415		1368	1915.65	2319.66	52.4086	165057		1368	1564.01	2628.98	38.2385	319541
1369	1098.6	1996.23	67.4019	84407		1369	932.518	2299.28	145.107	165040		1369	583.773	3290.59	60.6875	319450
1370	785.28	1981.96	86.272	84373		1370	733.06	2333.87	148.201	165035		1370	590.388	2764.8	63.9328	319428
1371	793.404	2243.46	74.1923	84372		1371	2339.58	1963.01	71.9159	165019		1371	2005.36	438.058	111.321	319422
1372	769.874	2541.54	81.479	84359		1372	1544.3	2480.42	59.8091	165009		1372	460.805	2999.12	61.8225	319340
1373	1298.77	2460.92	61.3679	84336		1373	1925.32	2280.44	47.55	164987		1373	589.167	2873.41	33.5294	319298
1374	355.944	2668.74	109.431	84297		1374	2126.26	2406.87	71.0519	164964		1374	2319.49	1321.11	72.1776	319291
1375	1297.94	2451.98	60.2769	84291		1375	2550.28	884.621	176.434	164950		1375	963.106	2913.04	53.7958	319227
1376	434.8	2668.25	97.4286	84251		1376	2278.09	2038.83	46	164924		1376	661.986	2934.54	44.0676	319209
1377	502.19	2792.84	77.8889	84248		1377	1636.57	2427.7	59.5283	164914		1377	2239.51	453.622	76.5803	319093
1378	1775.27	2111.32	32	84204		1378	2210.15	2112.66	41.4235	164848		1378	1589.6	2703.01	31.7477	319090
1379	390.2	2425.99	73.3571	84203		1379	1030.76	2249.78	153.076	164792		1379	2471.85	1282.48	78.0616	319086
1380	1255.01	2205.67	55.2564	84189		1380	2552.22	797.114	191.235	164781		1380	937.566	2977.75	42.1321	319067
1381	599.408	2462.49	98.5634	84178		1381	1688.97	2464.41	48.7467	164761		1381	885.741	2908.03	72.8038	319065
1382	1816.78	2184.26	52.5294	84176		1382	2346.26	2034.59	37.2727	164750		1382	1021.23	2764.84	41.9099	319045
1383	1997.23	2442.74	66.5325	84146		1383	1994.68	2281.11	60.1545	164744		1383	2427.5	2679.45	29.9787	319035
1384	922.862	2191.4	71.4253	84074		1384	2091.6	2136.73	64.9032	164648		1384	514.452	2772.78	57.9935	319009
1385	930.534	2187.89	87.8182	84065		1385	719.534	2140.41	171.639	164619		1385	677.171	2876.86	54.9241	318993
1386	495.129	2184.8	128.094	84051		1386	1154.95	2354.04	92.6867	164613		1386	2310.31	542.905	79.4464	318966
1387	391.05	2155.56	100.8	84038		1387	2222.09	1958.4	53.1207	164610		1387	755.841	2949.52	63.6138	318959
1388	429.535	2529.45	63.4507	84001		1388	2286.97	2120.88	21.4545	164571		1388	724.862	3004.88	37.8188	318889
1389	563.284	2620.26	96.527	84001		1389	1597.22	2369.19	66.4419	164415		1389	744.671	2776.13	56.7977	318886
1390	765.364	2188.09	118.818	83978		1390	2093.03	2400.87	46.8427	164381		1390	748.79	3031.73	70.1465	318698
1391	1123.18	2225.99	46.5342	83974		1391	1183.09	2373.34	100.115	164352		1391	850.495	3027.36	38.3	318694
1392	1084.87	2099.03	78.6324	83964		1392	735.711	2158.84	148.127	164339		1392	2303.99	1725.54	75.3548	318665
1393	890.84	2543.76	83.16	83883		1393	1870.85	2270.66	53.3846	164328		1393	962	2741.91	62.8571	318593
1394	994.698	2022.71	87.5116	83882		1394	1903.47	2394.73	77.2422	164325		1394	2238.02	690.319	93.5351	318537
1395	666.971	2036.81	97.3714	83852		1395	2044.27	2294.16	51.3223	164312		1395	2130.1	637.994	99.9333	318528
1396	445.907	2668.78	70.9897	83850		1396	2033.23	2378.44	59.8046	164270		1396	2399.53	319.43	107.242	318483
1397	391.569	2474.53	75.5833	83848		1397	2162.52	1911.9	77.6667	164264		1397	678.715	3036.66	62.2778	318480
1398	1538.85	2396.49	55.8146	83843		1398	2269.35	2180.84	51.0549	164257		1398	509.067	3025.83	45.5619	318287
1399	1678.52	2803.21	66	83820		1399	1857.97	2456.86	61.3232	164245		1399	1130.66	2788.39	62.7152	318280
1400	1431.03	2474.44	47.6104	83786		1400	2343.21	2309.96	45.6607	164184		1400	493.348	3132.73	58.9778	318220
1401	1270.9	2333.17	54.6949	83773		1401	1874	2356.1	70.9398	164115		1401	2157.07	385.622	126.539	318121
1402	1192.15	2115.12	47.4353	83766		1402	2294.26	2105.99	45.5568	164071		1402	2448.72	2857.12	29.087	318064
1403	1606.36	2213.53	26.506	83749		1403	2180.73	2271.49	77.5	163996		1403	1534.54	2531.45	38.4395	317995
1404	393.684	2586.75	73	83709		1404	2186	1881.18	50.1217	163897		1404	988.468	2988.1	58.2222	317961
1405	770.607	2033.8	118.786	83670		1405	2096.81	2275.98	45.784	163855		1405	580.286	2851.36	52.0062	317919
1406	1854.57	2223.43	42.0238	83667		1406	1173.19	2482.12	132.492	163819		1406	2391.35	2362.17	74.629	317916
1407	981.112	2358.43	100.265	83656		1407	1898.42	2424.48	59.4058	163808		1407	2441.34	541.006	116.458	317891
1408	1936.14	2067.53	34.473	83644		1408	2057.55	2507.53	35.4535	163802		1408	2312.93	1693.18	59.3071	317785
1409	469.957	2325.46	93.4017	83638		1409	2021.12	2394.28	45.1786	163767		1409	2339.7	1429.19	77.6058	317742
1410	374.319	2320.29	108.194	83633		1410	1109.49	2214.52	130.908	163744		1410	701.757	2873.06	45.7847	317737
1411	783.444	2339.21	85.6333	83625		1411	1020.77	2426.31	121.136	163723		1411	719.91	2959.7	42.9861	317645
1412	1900.16	2250.84	39.7302	83590		1412	2133.19	2219.81	31.6102	163710		1412	2259.89	305.582	88.9836	317601
1413	816.531	2155.23	110.422	83588		1413	2088.36	2230.59	46.8679	163694		1413	564.887	2883.23	42.3451	317576
1414	770.885	2443.81	104.244	83586		1414	1680.49	2497.97	49.5652	163639		1414	988.142	2886.09	74.7162	317534
1415	319.157	2638.06	74.902	83556		1415	612.765	2307.33	136.457	163625		1415	954.872	2912.75	33.6068	317441
1416	1207.23	2116.14	42.4091	83537		1416	800.424	2207.27	158.965	163592		1416	2395.47	605.852	90.4631	317425
1417	437.667	2125.35	105.464	83532		1417	892.156	2249.73	142.411	163508		1417	504.711	2935.07	55.9145	317406
1418	464.263	2306.46	66.7237	83526		1418	1996.43	2319.99	34.7143	163501		1418	1312.88	2652.57	29.3675	317381
1419	1162.42	2159.05	56.7976	83492		1419	1608.11	2466.5	50.4271	163495		1419	2210.76	2861.84	26.2111	317293
1420	1373.26	2099.48	53.5902	83464		1420	2413.94	1041.62	234.606	163366		1420	1317.08	2743.28	26.8396	317253
1421	730.74	2439.74	71	83459		1421	2108.58	2415.21	54.1011	163282		1421	2199.7	490.579	87.0409	317238
1422	307.962	2259.41	92.4872	83459		1422	1908.95	2406.49	52.7364	163242		1422	1474.76	2631	32.1447	317229
1423	2266.53	2798.48	97.4556	83437		1423	2100.03	1483.7	104.133	163199		1423	1999.22	509.381	99.2245	317221
1424	1530.2	2214.4	58.5056	83435		1424	1101.33	2220.93	120.903	163188		1424	730.333	3059.97	66.8848	317220
1425	1686.84	2255.62	22.5	83420		1425	744.786	2602.72	99.269	163177		1425	2115.21	2683.16	19.4948	317123
1426	608.082	2824.03	90.6885	83419		1426	1795.59	2448.73	42.1918	163164		1426	854.352	2887.17	77.568	317115
1427	1089.63	2138.5	49.6154	83416		1427	2545.8	929.032	202.25	163139		1427	2303.57	316.454	130.059	317106
1428	694.655	1981.95	104.488	83415		1428	2287.37	2093.73	67.5545	163078		1428	935.126	2804.97	67.4241	317103
1429	1126.39	2565.96	81.4937	83397		1429	1763.7	2267	77.1625	162970		1429	2457.83	1481.51	85.1489	317072
1430	2188.23	2396.58	52.4091	83391		1430	2116.94	1539.3	102.94	162970		1430	2159.35	414.964	89.4107	317049
1431	580.481	2542.52	96.5823	83369		1431	1961.71	2368.4	47.5319	162931		1431	754.756	3051.34	72.9432	317036
1432	860.99	2207.93	86.52	83312		1432	1614.15	2313.41	84.5109	162892		1432	665.667	2746.29	50.2619	317015
1433	1763.95	2145.07	36	83311		1433	2243.4	2099.88	22.8452	162870		1433	896.759	3114.23	54.1121	316965
1434	560.351	2056.97	98.5258	83311		1434	1929.49	2278.86	82.3431	162847		1434	1138.24	2714.88	38.3478	316926
1435	1100.8	2237.59	114.493	83305		1435	2252.47	2337.39	45.8125	162742		1435	619.937	2990.04	62.8671	316920
1436	1919.25	2169.44	40.3951	83275		1436	765.8	2384.07	103.779	162725		1436	530.957	2895.99	61.2128	316882
1437	1075.21	2200.04	48.4556	83273		1437	1857.82	2342.61	65.5476	162695		1437	1509.99	2744.44	40.9389	316874
1438	1063.91	2244.75	76.2247	83255		1438	1739.28	2413.99	71.8416	162600		1438	703.169	3132.42	43.9032	316867
1439	1651.32	2413.04	44.519	83221		1439	2217.16	2428.32	60.1765	162585		1439	2434.42	431.033	111.191	316842
1440	379.988	2534.09	88.4767	83193		1440	2206.57	2051.53	30.5413	162578		1440	1346.5	2725.34	37.7163	316839
1441	1854.87	2647.09	52.3091	83191		1441	2243.66	2036.77	55.5493	162576		1441	2274.4	2834.17	27.9167	316801
1442	1338.05	2101.38	49.4758	83171		1442	2123.79	2386.14	65.7025	162514		1442	1734.89	2609.86	29.8012	316776
1443	1310.35	2191.32	39.8636	83162		1443	2154.74	2032.12	52.3068	162478		1443	928.945	2994.34	67.774	316713
1444	375.028	2318.56	79.3803	83145		1444	2571.33	987.646	191.095	162465		1444	1781.93	2660.26	32.729	316692
1445	1743.15	2487.32	42.6438	83138		1445	1823.45	2393.41	71.7733	162390		1445	534.572	3019.59	46.8722	316669
1446	1074.56	2125.55	50.4731	83138		1446	1896.81	2372.79	79.5327	162390		1446	691.341	2835.25	36.4048	316667
1447	1215.46	2199.46	43.661	83125		1447	1927.22	2237.17	71.7686	162382		1447	1822.93	2630.04	34.9882	316652
1448	713.857	2621.09	82.5	83047		1448	784.649	2257.72	171.615	162369		1448	1779.98	2607.09	38.5616	316632
1449	1869.95	2633.83	60.7364	83030		1449	2172.2	2357.87	53.783	162346		1449	2402.03	2744.02	31.0294	316622
1450	674.981	2036.56	96.8704	83003		1450	2256.21	2085.31	15	162304		1450	951.959	2954.96	65.7787	316359
1451	1654.48	2349.92	34.3874	82945		1451	2552.78	1010.71	197.35	162303		1451	2450.94	2692.67	63.251	316342
1452	1428.08	2491.63	63.7333	82934		1452	706.235	2565.86	117.383	162289		1452	2184.75	439.825	102.571	316308
1453	1036.27	2436.06	61.2885	82919		1453	1081.79	2194.39	166.546	162155		1453	2128.67	323.913	119.467	316237
1454	1766.7	2216.13	56.4416	82898		1454	2331.21	1925.12	71.3077	162154		1454	1747.87	2624.64	43.2302	316201
1455	382.714	2195.16	97.6349	82877		1455	2169.93	2366.58	25.3125	162099		1455	1075.49	2728.14	36.6154	316122
1456	839.883	2315.17	76.5833	82876		1456	1752.71	2309.56	66.4109	162084		1456	2306.18	441.949	94.7707	316063
1457	1855.35	2286	63.3048	82864		1457	2011.06	2434.4	47.6514	162080		1457	442.623	2921.67	56.0123	315991
1458	1746.35	2309.33	24.1458	82861		1458	1585.96	2372.33	81.2124	162043		1458	2144.01	311.877	102.815	315985
1459	562.941	2581.99	92.3529	82848		1459	847	2380.77	124.056	162011		1459	906.24	3144.84	57.496	315981
1460	554.576	2855.79	66.4394	82838		1460	573.897	2495.4	133.603	162000		1460	2225.06	337.487	120.987	315902
1461	442.91	2241.55	75.8507	82835		1461	2140.56	2259.55	66.5519	161947		1461	1898.48	2713.61	22.3868	315873
1462	459.603	2135.84	118.345	82825		1462	2358.36	2347.55	48.5887	161938		1462	1000.69	2894.2	52.6122	315851
1463	674.484	2712.05	85.9844	82822		1463	1061.01	2312.28	138.28	161931		1463	2286.99	2185.29	68.2773	315845
1464	608.912	2918.75	77.5147	82811		1464	1952.58	2241.42	53.6706	161925		1464	958.098	2924.46	64.0492	315838
1465	363.967	2219.3	82.5934	82803		1465	2262.47	2012.63	51.3976	161865		1465	1532.62	2689.78	44.2754	315776
1466	1155.67	2279.24	88.52	82777		1466	1903.08	2414.07	86.2083	161863		1466	659.865	2858.68	53.8446	315771
1467	695.333	2188.63	80.9333	82772		1467	1888.07	2381.8	51.2262	161852		1467	2356.68	401.408	107.598	315767
1468	615.986	2747.16	90.3714	82707		1468	545.867	2487.08	118.295	161841		1468	1266.7	2808.87	36.3433	315686
1469	1372.23	2376.92	38.5225	82700		1469	1842.13	2291.83	49.3684	161770		1469	952.836	2868.36	55.7071	315659
1470	1289.74	2292.55	31.45	82694		1470	2002.39	2372.53	62.8454	161741		1470	2455.63	412.102	88.506	315644
1471	852.695	2522.43	86.8105	82680		1471	561.091	2510.26	116.324	161728		1471	1485.64	2750.93	38.8074	315569
1472	576.737	2338.3	69.4342	82676		1472	570.42	2560.04	109.071	161718		1472	495.043	3210.16	61.9676	315489
1473	1751.08	2119.68	50.3492	82655		1473	1062.33	2462.32	104.034	161683		1473	1312.1	2762.67	38.1618	315489
1474	967.384	2539.05	77.5068	82638		1474	1765.72	2342.7	93.1011	161667		1474	1136.24	2665.85	62.5357	315488
1475	1699.89	2495.58	45.6364	82629		1475	2285.56	1967.19	20.4091	161667		1475	1048.83	2949.42	44.8705	315453
1476	424.245	2698.62	89.3774	82617		1476	2118.77	2298.28	41.5	161640		1476	907.878	3003.89	71.8851	315434
1477	481.213	2404.9	107.197	82614		1477	2231.54	2376.87	49.9574	161605		1477	2360.15	2824.05	19.7339	315428
1478	1028.94	2482.46	82.9375	82607		1478	831.765	2293.79	141.285	161580		1478	920.719	2887.28	38.3481	315407
1479	592.221	2675.93	71.4265	82594		1479	2238.19	2434.89	55.3077	161564		1479	2361.39	383.906	79.2969	315402
1480	1081.37	1974.14	75.5	82567		1480	2198.23	2441.81	56.1308	161538		1480	1150.1	2783.81	66.8121	315397
1481	1479.87	2304.3	49.3881	82536		1481	2350.87	2178.55	41.3134	161536		1481	1948.13	2628.86	32.2326	315365
1482	1265.84	2328.73	88.3605	82529		1482	881.301	2538.67	124.669	161479		1482	969.286	2723.84	55.4381	315350
1483	497.019	2346.48	84.6852	82528		1483	888.628	2534.26	120.837	161463		1483	2062.65	458.748	116.528	315226
1484	1848.04	2436.52	43.0864	82511		1484	2297.81	2405.25	29.8235	161461		1484	2321.43	272.217	114.489	315170
1485	370.672	2704.39	105.594	82509		1485	1130.45	2237.15	120.063	161444		1485	878.956	3035.27	57.7876	315150
1486	1219.34	2404.94	62.5686	82446		1486	2122.65	2329.6	43.5256	161365		1486	913.282	2899.49	73.2471	315131
1487	562.07	2701.05	74	82446		1487	1891.98	2402.08	41.5581	161302		1487	1904.49	2792.72	20.8485	315101
1488	939.841	2343.99	73.4058	82441		1488	576.354	2543.2	129.795	161295		1488	2342.65	556.986	115.716	315058
1489	434.113	2715.85	102.513	82421		1489	732.874	2184.21	142.655	161285		1489	849.732	3211.97	62.1667	315039
1490	827.312	2444.3	91.4545	82420		1490	2654.21	797.57	178.887	161278		1490	2526.49	366.201	102.054	315024
1491	441.867	2730.05	89.5067	82369		1491	751.453	2540.62	110.237	161270		1491	2081.59	370.158	117.007	314965
1492	1497.31	2612.65	66.268	82357		1492	744.173	2138.25	145.227	161269		1492	2289.37	483.436	76.2179	314947
1493	1152.41	2259.85	56.3662	82326		1493	2025.06	2315.34	37.3838	161269		1493	2354.03	367.628	92.8686	314930
1494	1390.09	2316.77	33.0175	82317		1494	2330.7	2084.15	34.6707	161218		1494	2074.17	425.051	121.038	314913
1495	652.985	2235.82	69.5606	82314		1495	2000.51	2392.15	46.0305	161209		1495	2422.36	2904.99	36.55	314838
1496	1392.6	2582.86	56.1724	82296		1496	1635.99	2396.87	77.5429	161195		1496	881.537	2990	61.8692	314827
1497	357.688	2431.24	86.5125	82289		1497	1215.8	2213.18	117.043	161154		1497	2108.95	537.417	88.2343	314819
1498	871.71	2433.52	59.5652	82266		1498	795.787	2225.62	138.664	161134		1498	1629.18	2642.16	31.6301	314809
1499	1865.84	2203.3	34.4262	82226		1499	2374.81	2313.56	64.6316	161084		1499	1219.62	2696.09	32.4554	314776
1500	959.611	2346.47	65.3194	82221		1500	842.736	2531.46	118.936	161077		1500	2536.42	487.584	115.988	314756
1501	507.722	2407.09	59.6667	82211		1501	1103.68	2483.9	89.2735	161055		1501	691.419	3015.48	29.0427	314754
1502	555.814	2591.74	107.477	82193		1502	2183.48	2301.7	53.6629	161050		1502	807.707	2898.56	56.2994	314731
1503	968.574	2084.49	91.6618	82192		1503	2266.86	2230.18	44.3333	160980		1503	857.636	3067.52	54.2775	314672
1504	683.5	2676.3	64.7407	82182		1504	2539.72	965.014	206.671	160957		1504	2286.11	299.256	105.981	314606
1505	1317.01	2040.18	53.3521	82179		1505	2322.7	2015.89	82.75	160944		1505	2440.93	461.318	121.98	314589
1506	1675.36	2275.15	23.9485	82168		1506	1061.34	2074.45	143.232	160934		1506	2319.37	2780.99	27.1057	314580
1507	1719.77	2146.48	78.4026	82167		1507	686.019	2430.02	122.37	160782		1507	497.496	2855.72	47.1969	314512
1508	1705.89	2261.38	33.5278	82158		1508	1840.25	2373.88	89.0235	160777		1508	2305.5	2226.12	61.078	314477
1509	507.589	2240.03	79.3973	82139		1509	2121.96	1997.7	85.2124	160763		1509	676.408	2971.84	37.864	314452
1510	840.048	2317.64	66.2857	82134		1510	2109.01	2256.86	51.2976	160734		1510	629.704	2778.76	66.1652	314353
1511	1876.33	1982.78	58.4432	82127		1511	2018.99	2307.9	47.8571	160655		1511	1964.94	2684.81	26.3	314284
1512	292.64	2210.46	88.1985	82122		1512	2169.11	2020.41	56.1717	160651		1512	2322.41	416.478	79.8088	314260
1513	635.769	2305.23	78.5256	82117		1513	1987.71	2228.42	72.5455	160537		1513	2369.62	368.399	120.532	314240
1514	512.765	2177.46	123.551	82107		1514	713.642	2165.44	146.038	160475		1514	806.681	3001.91	61.2609	314165
1515	387.164	2820.93	83.0299	82096		1515	1194.96	2457.53	94.0424	160451		1515	2494.96	2757.81	36.0932	314164
1516	359.129	2200.95	89.6774	82093		1516	1072.14	2081.5	146.959	160451		1516	610.856	2856.72	39.9733	314140
1517	748.402	2723.4	91.4512	82092		1517	2039.72	2350.05	76.4756	160394		1517	2068.57	386	87.6412	314073
1518	1836.11	2652.81	58.9277	82082		1518	2095.36	2308.35	55.0247	160368		1518	2353.15	1600.53	83.4656	314069
1519	594.734	2599.17	87.3511	82081		1519	2228.29	2004.72	38.3818	160295		1519	2148.35	367.154	88.9321	314067
1520	437.114	2289.03	92.6	82055		1520	1586.29	2319.46	63.785	160265		1520	865.426	3064.45	48.1479	314038
1521	1377.84	2343.22	37.3451	82047		1521	1684.19	2357.63	90.7054	160163		1521	859.362	3002.53	59.5462	314031
1522	1452.27	2422.93	53.5049	82046		1522	838.248	2306.05	142.46	160134		1522	2160.07	290.379	104.825	313973
1523	1053.11	2205.82	78.3846	82038		1523	2290.39	1702.42	98.8224	160052		1523	2266.26	516.954	81.3355	313958
1524	1196.02	2393.02	73.6818	82019		1524	2172.51	2338.43	28.6377	159914		1524	2127.41	2694.4	35.0847	313956
1525	584.824	2636.18	63.9608	82009		1525	1798.3	2305.26	50.9495	159907		1525	2540.14	413.206	92.8894	313944
1526	819.987	2044.49	76.557	81997		1526	2315.42	1974.79	58.3205	159881		1526	1299.6	2597.37	40.5506	313940
1527	686.87	2096.38	118.532	81996		1527	617.036	2538.53	136.319	159809		1527	2426.6	478.351	82.0936	313898
1528	336.388	2668.03	86.2836	81983		1528	1833.72	2431.87	81.8191	159779		1528	2398.16	529.874	82.2814	313844
1529	864.398	2058.43	100.614	81983		1529	510.624	2514.99	117.275	159778		1529	985.114	2858.67	38.5429	313843
1530	570.607	2119.48	103.607	81976		1530	615.943	2186.99	148.807	159778		1530	549.017	2844.78	47.2435	313801
1531	1064.2	2323.26	92.9714	81902		1531	1937.57	2348.21	76.5625	159762		1531	2323.7	1763.86	77.1189	313765
1532	533.59	2485.62	84.2393	81902		1532	1992.71	2289.93	65.2444	159759		1532	543.164	2814.61	61.2761	313744
1533	1660.92	2508.44	59.4795	81898		1533	1784.91	2275.51	55.3496	159747		1533	1528.83	2699.81	29.2018	313707
1534	1782.26	2627.11	50.3692	81889		1534	2231.15	2124.59	79.3448	159744		1534	1303.52	2613.93	28.4112	313577
1535	474.645	2477.91	59.9342	81854		1535	2233.08	2026.93	67.2632	159742		1535	2166.05	375.56	123.142	313550
1536	395.474	2250.85	106.5	81850		1536	1025.09	2302.33	151.867	159672		1536	1027.52	2898.16	66.5674	313524
1537	447.838	2162.84	113.647	81829		1537	2121.05	2017.78	89.8018	159664		1537	2103.31	484.076	89.0892	313402
1538	731.358	2302.84	60.4938	81817		1538	739.652	2146.21	147.787	159580		1538	2555.1	380.558	110.987	313386
1539	642.848	2237.16	70.4557	81799		1539	942.726	2358.73	101.767	159557		1539	2213.5	473.682	88.7197	313361
1540	1374.26	2090.78	41.4384	81785		1540	855.051	2154.46	161.481	159545		1540	2352.82	717.959	85.9932	313353
1541	556.961	2241.01	93.5526	81776		1541	2368.97	2047.55	76.5217	159521		1541	620.69	2705.61	63.0078	313308
1542	1753.62	2123.74	37.9787	81773		1542	1082.35	2059.12	146.982	159456		1542	430.743	2868.76	56.973	313266
1543	1021.26	2286.27	55.2222	81761		1543	2412.56	2183.44	33.9292	159410		1543	2097.23	2718.34	33.3117	313214
1544	1044.21	2251.12	63.3951	81722		1544	1068.48	2294.34	156.077	159398		1544	2285.79	714.974	90.7906	313212
1545	1961.77	2064.32	39.283	81690		1545	2448.42	2233.28	45.1505	159327		1545	2345.72	2867.6	19.4	313195
1546	1151.23	2126.09	82.6308	81687		1546	1053.29	2440.53	95.3786	159320		1546	2429.34	511.596	119.808	313174
1547	855.645	2516.26	76.5968	81676		1547	1873.86	2267.57	65.4066	159277		1547	682.403	3130.07	60.8387	313156
1548	515.582	2922.48	77.4328	81673		1548	1655.13	2476.83	47.955	159245		1548	751.702	3099.53	33.7193	313012
1549	1453.56	1975.25	51.3448	81649		1549	982.15	2346.47	175.617	159195		1549	544.803	3100.93	47.0136	312968
1550	1238.53	2048.43	56.5135	81648		1550	1002.45	2250.11	157.548	159168		1550	2378.37	2874.21	56.743	312953
1551	1834.76	2486.78	47.6383	81646		1551	688.53	2127.23	180.113	159110		1551	769.496	2743.82	50.4118	312951
1552	1889.05	2080.31	48.5679	81631		1552	845.762	2343.89	125.123	159039		1552	546.171	2714.5	44.3248	312903
1553	766.182	2243.98	108.691	81606		1553	2195.07	1940.41	59.1604	159032		1553	2389.93	1609.73	82.8402	312888
1554	872.017	2150.2	60.678	81597		1554	1581.49	2383.07	62.2842	159025		1554	893.058	2793.53	42.529	312771
1555	1241.96	2313.36	49.597	81593		1555	2078.04	2235.88	89.8053	158986		1555	2283.24	1048.41	82.2232	312725
1556	966.016	2047.29	74.629	81582		1556	2110.47	2316.95	86.7723	158920		1556	962.094	2867.76	71.3597	312626
1557	830.07	1992.3	88.5965	81581		1557	1999.83	2460.69	47.4468	158917		1557	1092.36	2753.75	41.4889	312577
1558	1259.43	2372.49	38.4714	81564		1558	2437.41	2211.6	42.2222	158904		1558	2542.96	2545.92	64.2176	312536
1559	870.483	2371.62	71.5167	81551		1559	2118.68	2202.24	88.7447	158880		1559	839.025	2923.64	75.5339	312510
1560	704.049	2636.43	71.7377	81530		1560	2115.54	1248.8	162.893	158871		1560	633.328	2847.82	72.5538	312493
1561	1661.11	2229.76	34.5455	81525		1561	1903.2	2379.78	42.25	158870		1561	2260.19	2667.58	45.8889	312452
1562	601.333	2857.11	72.2222	81512		1562	744.62	2195.26	139.75	158865		1562	1847.01	2644.3	29.9353	312431
1563	1005.68	2427.38	81.1786	81498		1563	2174.8	2348.73	34.5816	158840		1563	2396.5	1358.94	70.8961	312348
1564	1133.21	2102.38	60.8175	81493		1564	1902.74	2249.95	61.7132	158805		1564	837.363	3160.78	72.3185	312301
1565	800.362	2053.9	96.5862	81472		1565	1521.28	2357.4	83.6493	158780		1565	763.159	2982.21	35.5455	312217
1566	938.969	2149.79	61.5625	81415		1566	1737.69	2422.15	95.8791	158741		1566	566.246	2991.45	61.0986	312200
1567	639.324	2450.9	104.886	81400		1567	2068.77	2263.57	46.7368	158687		1567	2133.69	539.978	95.1011	312190
1568	740.028	2608.02	93.4537	81398		1568	2356.53	2103.94	84.8019	158645		1568	2354.19	2152.88	72.0048	312139
1569	1158.5	2246.6	54.2258	81394		1569	1543.71	2422.99	100.383	158644		1569	1237.77	2713.19	43.9338	312109
1570	1722.88	2178.65	31	81391		1570	1749.91	2370.16	70.9483	158629		1570	2372.58	405.829	89.7643	312082
1571	1003.55	2395.77	92	81380		1571	1985.03	2348.41	57.8228	158607		1571	971.97	2800.83	40.9172	312066
1572	1599.53	2417.22	41.5263	81370		1572	1071.07	2126.68	131.019	158578		1572	2144.03	2704.55	42.9862	312041
1573	663.987	2452.25	74.5063	81368		1573	2153.39	1887.64	54.3448	158488		1573	1751.59	2606.93	44.903	311999
1574	695.757	2742.4	82.6	81294		1574	2098.49	2391.01	52.1684	158473		1574	2226.15	2789.7	27.4754	311945
1575	1109.24	2087.23	99.3721	81293		1575	1666.1	2281.73	60.8723	158469		1575	815.697	3088.28	40.8073	311944
1576	927.453	2141.99	82.6	81280		1576	2024.8	2205.09	60.0463	158432		1576	1222.9	2739.58	62.1465	311912
1577	1741.55	2717.68	71.5342	81277		1577	1063.87	2106.45	151.754	158388		1577	650.884	3170.38	46.3261	311910
1578	1761.32	2784.4	63.5119	81274		1578	1959.96	2324.64	54.1308	158384		1578	2065.75	2679.75	20.481	311873
1579	929.553	2099.1	76.4043	81263		1579	2059.77	2420.51	52.4773	158381		1579	2472.89	1544.56	68.1126	311865
1580	595.49	2385.83	106.108	81248		1580	2319.24	2093.65	32.1417	158351		1580	1807.94	2687.22	29.2549	311861
1581	1212.46	2338.2	49.7077	81214		1581	2610.65	925.145	199.451	158350		1581	2196.03	728.214	99.5	311859
1582	1542.96	2375.79	45.1786	81202		1582	2350.47	2185.71	41.0267	158327		1582	2299.67	1734.54	56.3687	311844
1583	654.532	2024.55	111.419	81199		1583	935.109	2421.67	102.828	158239		1583	1783.06	2653.69	24.8257	311791
1584	1894.79	2685.55	55.575	81187		1584	2021.28	2332.93	52.9912	158239		1584	716.017	2766.97	61.2056	311727
1585	1206.67	2077.49	56.5556	81182		1585	2111.19	1974.05	44.12	158229		1585	790.539	3117.96	38.8383	311706
1586	1048.41	2215.52	56.6267	81180		1586	2356.5	1994.5	38.8056	158127		1586	811.871	3084.81	70.8645	311666
1587	270.318	2253.26	105.561	81173		1587	2012.58	2350.61	58.8929	158075		1587	2330.38	2809.18	35.1507	311647
1588	455.311	2675.43	64.3279	81170		1588	2010.42	2236.66	44.4156	158069		1588	628.375	2978.32	60.5078	311614
1589	432.413	2225.31	83.2975	81162		1589	2233.62	2302.22	59.6705	158026		1589	2394.71	1174.23	73.8113	311602
1590	783.681	2724.09	94.5851	81161		1590	2143.09	2412.2	58.3939	158007		1590	748.891	2860.56	68.9886	311585
1591	1816.11	2752.06	71.6571	81155		1591	1887.29	2389.27	69.5484	157980		1591	1878.25	2650.46	31.7523	311557
1592	1744.23	2010.71	75.5652	81144		1592	907.151	2460.73	161.092	157970		1592	480.814	2746.95	59.8454	311556
1593	1734.85	2135.75	28.6226	81134		1593	962.569	2310.33	134.715	157931		1593	2393.49	494.645	123.638	311544
1594	1055.43	2187.33	94.3968	81131		1594	2194.94	1984.61	58.3636	157894		1594	898.193	2819.71	38.6832	311439
1595	253.13	2195.92	100.824	81122		1595	872.381	2461.83	116.169	157879		1595	2471.1	2683.43	52.068	311439
1596	508.132	2086.18	131.088	81106		1596	745.022	2571.87	111.181	157866		1596	599.278	2859.83	40.9537	311301
1597	1625.15	2246.33	60.7303	81088		1597	2327.96	2115.68	49.2179	157853		1597	2258.54	2819.72	15.9862	311286
1598	1374.92	2245.32	88.473	81064		1598	728.041	2166.72	141.101	157717		1598	2711.09	2824.81	115.332	311253
1599	2088.79	2236.48	49.4935	81054		1599	2110.37	2231.27	35.3524	157713		1599	2441.02	293.054	109.149	311233
1600	1865.59	2416.97	48.7344	81023		1600	2357.17	2386.62	47.8739	157698		1600	757.237	3165.97	49.8986	311186
1601	1219.86	2355.62	74.4557	81019		1601	1814.43	2440.71	45.9691	157677		1601	787.538	3009.13	52.9423	311175
1602	788.632	2133.72	100.75	81002		1602	1109.71	2446.62	91.8607	157666		1602	774.37	3121.62	40.1092	311170
1603	1430.6	2120.85	35.6176	81001		1603	1994.38	2395.07	55.486	157603		1603	1529.81	2683.97	45.2478	311094
1604	1776.18	2506.19	41.4265	81000		1604	2355.31	2203.88	64.1059	157483		1604	791.349	3092.47	62.2071	310995
1605	882.303	2051.26	72.4211	80999		1605	2485.89	992.058	239.822	157463		1605	733.641	3114.26	45.1795	310901
1606	1176.15	2007.66	69.9697	80991		1606	2045.55	2361.58	78.3736	157438		1606	659.628	3080.33	41.1667	310837
1607	438.39	2523.99	112.549	80986		1607	1825.84	2407.59	88.5573	157435		1607	2401.12	511.284	97.4383	310759
1608	1649.48	2291.8	45.6667	80931		1608	2172.09	2085.08	43.3759	157394		1608	2366.88	308.178	100.473	310735
1609	449.414	2421.01	59.8649	80908		1609	2111.14	2129.72	57.5596	157358		1609	905.576	2980.26	46.8079	310728
1610	1114.39	2173.68	69.5443	80828		1610	2263.7	1557.5	108.524	157349		1610	976.092	2751.16	59.8846	310718
1611	1625	2479.13	60.5	80825		1611	1597.11	2327.78	88.9057	157325		1611	2470.5	454.308	112.771	310688
1612	1767.39	2636.42	59.6486	80802		1612	1185.22	2134.97	142.056	157312		1612	2240.13	2836.81	31.1337	310683
1613	1397.76	2361.32	39.629	80795		1613	2118.59	2400.87	41.8947	157283		1613	1465.95	2638.78	45.9767	310630
1614	597.525	2526.07	105.131	80792		1614	741.105	2251.26	138.295	157257		1614	2464.09	1810.22	71.9603	310625
1615	1714.87	2153.49	24.7447	80786		1615	2200.39	2242.47	68.5547	157256		1615	729.583	2992.17	66.9449	310588
1616	729.448	2034.95	128.149	80767		1616	2323.36	2181.15	40.4651	157206		1616	798.34	3171.15	50.183	310588
1617	1533.14	2199.17	79.37	80756		1617	1189.32	2313.28	107.875	157202		1617	1146.38	2895.14	46.592	310583
1618	1215.91	2253.59	35.5309	80700		1618	1580.18	2352.23	60.9588	157169		1618	577.254	3284.57	62.2676	310521
1619	436.103	2538.28	59	80685		1619	657.148	2563.03	120.081	157164		1619	879.793	2944.21	31.2621	310439
1620	992.742	1982.06	74.5484	80682		1620	2087.3	2254.22	75.1237	157158		1620	641.36	2986.44	32.176	310422
1621	1439.91	2547.53	59.5714	80669		1621	1712.2	2323.61	73.3832	157148		1621	2372.62	2843.03	26.712	310402
1622	409.959	2353.03	71.5342	80659		1622	2212.18	2450.12	64.4286	157141		1622	1390.62	2728.68	41.9861	310386
1623	1788.95	2251.44	63.3091	80655		1623	2153.25	1399.07	120.662	157126		1623	1668.88	2731.97	21.4832	310347
1624	1453.93	2228.06	84.0247	80634		1624	2360.57	2378.55	55.6042	157120		1624	2119.56	432.984	86.3577	310320
1625	1661.54	2249.56	39.4667	80631		1625	2196.51	1998.55	29.3534	157078		1625	755.538	3136.86	74.9077	310250
1626	1605.46	2472.11	55.8434	80558		1626	1041.92	2493.38	88.2414	157069		1626	567.224	2764.22	45.2039	310229
1627	826.28	2315.8	63.92	80553		1627	1088.03	2501.67	93.5962	157063		1627	448.231	2873.82	52.5385	310194
1628	444.891	2671.93	61.7273	80551		1628	2078.08	1549.26	103.856	156988		1628	490.035	2701.64	59.4539	310157
1629	1384.65	2357.78	44.3514	80547		1629	2113.2	1790.18	114.17	156987		1629	2059.74	487.535	92.2708	310125
1630	324.245	2586.67	73.7143	80491		1630	854.752	2286.99	145.177	156979		1630	1601.89	2583.69	23.5495	310087
1631	929.009	2047.53	72.4643	80461		1631	1950.32	2476.91	56.8974	156971		1631	2484.05	2243.08	60.7548	310054
1632	1911.66	2269.49	40.6792	80445		1632	673.521	2585.61	121.294	156945		1632	2218.32	402.797	79.8116	310026
1633	1949.32	2778.81	71.6087	80419		1633	1803.19	2386.17	67.5195	156888		1633	628.637	2757.46	66.6593	310017
1634	952.016	2151.58	74.625	80418		1634	2335.51	2230.84	37.06	156869		1634	1629.74	2593.84	25.3103	309980
1635	1951.52	2215.3	54.45	80418		1635	1589.47	2330.66	82.8966	156852		1635	2126.59	496.006	111.516	309850
1636	581.356	2439.74	81.4658	80417		1636	562.562	2490.75	101.5	156835		1636	2308.11	2901.8	34.549	309813
1637	609.833	2576.68	54.5833	80416		1637	2185.9	2041.8	38.4937	156777		1637	2461.67	1204	79.4654	309806
1638	966.07	2324.44	100.488	80393		1638	660.456	2433.82	118	156733		1638	2125.07	2747.52	19.6391	309789
1639	953.987	2362.99	89.3544	80382		1639	1147.86	2148.9	120.397	156730		1639	2059.47	440.14	97.7622	309788
1640	1908.82	2348.72	56.6262	80348		1640	1708.6	2409.73	86.3727	156679		1640	817.719	2997.42	69.1953	309772
1641	738.34	2260.15	66.2268	80344		1641	2251.98	2059.74	30.6316	156662		1641	688.782	2757.6	54.9182	309744
1642	622.15	2509.22	91.55	80334		1642	1203.94	2339.85	98.9189	156660		1642	2482.54	626.357	97.7143	309726
1643	1567.06	2675.82	63.5556	80331		1643	1658.06	2314.71	61.3729	156626		1643	718.918	2883.93	67.0815	309708
1644	913.361	2174.19	81.5422	80326		1644	2000.34	2468.02	56.8068	156608		1644	2428.48	1178.7	78.582	309674
1645	765.754	2350.49	75.377	80316		1645	2010.93	2388.23	54.9787	156532		1645	514.415	3047.62	60.4718	309668
1646	926.365	2171.03	99.5714	80288		1646	2627.51	792.94	195.339	156513		1646	2327.39	2768.33	24.3092	309657
1647	270.296	2214.12	97.4691	80284		1647	2154.62	2194.72	35.5319	156511		1647	1507.87	2729.73	32.8322	309646
1648	1666.06	2365.18	43.6308	80280		1648	2087.81	2366.38	73.0645	156509		1648	917.917	3124.34	68.725	309607
1649	1320.68	2037.15	72.2615	80267		1649	2289.83	2087.98	55.4881	156509		1649	1582.79	2644.02	37.0672	309606
1650	723.544	2575.42	81.481	80259		1650	2149.4	1928.92	79.2	156499		1650	397.475	2804.59	51.925	309591
1651	1597.91	2624.19	64.2632	80259		1651	2047.53	2369.25	98.7615	156467		1651	2214.79	554.415	85.0252	309571
1652	1809.1	2307.68	28.64	80257		1652	1883.21	2317.44	48.6765	156466		1652	846.651	2843.72	44.7852	309503
1653	460.887	2257.97	110.525	80251		1653	651.404	2512.41	102.382	156456		1653	2476.55	2882.37	36.3594	309500
1654	971.16	2365.28	94.4444	80245		1654	2548.14	922.815	207.056	156411		1654	2336.89	2687.12	29.0196	309493
1655	1341.88	2441.76	36.8088	80226		1655	2315.98	2151.61	70.5567	156357		1655	2119.87	572.126	105.83	309490
1656	1912.84	2090.17	39	80218		1656	1803.2	2390.28	61.0241	156344		1656	2100.18	327.934	117.691	309477
1657	698.913	2097.39	86.5543	80211		1657	2292.04	2410.3	44.0143	156332		1657	644.247	2996.48	33.4	309470
1658	541.477	2569.55	68.4312	80204		1658	1802.8	2379.67	81.1856	156281		1658	2440.82	587.136	88.2313	309358
1659	414.973	2813.92	89.5	80173		1659	738.528	2547.51	114.098	156234		1659	782.743	3195.74	52.8382	309341
1660	1543.06	2171.07	49.403	80137		1660	580.042	2363.75	173.339	156200		1660	591.863	2896.88	64.451	309340
1661	1339.39	2095.42	79.1404	80121		1661	2195.61	2136.61	51.5053	156067		1661	2331.02	426.24	91.4431	309292
1662	1438.54	2506.43	61.6984	80111		1662	2181.37	1952.57	62.7126	156032		1662	2412.18	1689.05	63.5817	309285
1663	1656.91	2468.35	45.557	80108		1663	2026.22	2280.22	64.687	156019		1663	890.949	3075.54	75.9855	309283
1664	1365.18	2440.85	50.5	80085		1664	1187.41	2211.16	130.735	156004		1664	2057.84	365.669	90.5923	309237
1665	1515.66	2016.27	67	80055		1665	2150.29	2063.14	24.4884	155984		1665	1000.81	2905.08	68.1944	309206
1666	1823.79	2102.33	35.0938	80027		1666	583.688	2513.93	125.568	155956		1666	2179.97	309.59	95.8952	309074
1667	1725.63	2764.95	66.4819	79990		1667	2174.93	2228.2	53.449	155936		1667	2815.46	2770.02	98.7712	309047
1668	855.82	2207.38	60.86	79985		1668	2185.96	1960.24	23.3556	155896		1668	739.373	3024.67	35.3818	309037
1669	865.227	2134.61	119.454	79984		1669	2167.22	2316.35	47.2232	155893		1669	2432.49	2688	38.0632	308958
1670	1217.27	2299.85	54.5238	79975		1670	1976.85	2312.83	35.471	155871		1670	774.391	3273.32	71.4203	308898
1671	484.964	2782.62	102.696	79958		1671	2379.46	2312.07	35.4	155846		1671	846.763	3155.19	53.7554	308897
1672	487.612	2158.67	113.343	79947		1672	2217	2016.13	23.9667	155839		1672	647.647	3000.14	38.5665	308883
1673	434.738	2267.37	68.5692	79935		1673	1983.01	2478.09	33.0864	155805		1673	763.449	3184.54	72.7373	308864
1674	1103.5	2248.36	78.4625	79922		1674	568.989	2496.78	117.809	155796		1674	1574.43	2600.98	29.7162	308858
1675	807.5	2073.53	109.875	79921		1675	696.865	2571.06	120.192	155790		1675	573.411	2888.97	39.5	308847
1676	1788.49	2766.68	69.5395	79910		1676	2210	2036.89	31.4615	155767		1676	1368.06	2658.83	48.6389	308834
1677	1558.15	2249.19	29.4865	79897		1677	909.348	2422.21	103.887	155760		1677	2345.15	2774.57	31.5099	308820
1678	1010.78	2362.14	60.5625	79889		1678	1824.86	2307.55	58.0641	155682		1678	632.665	3012.94	60.9908	308771
1679	734.19	2137.9	84.3291	79872		1679	696.372	2466.7	126.174	155678		1679	1498.58	2750.29	19.7672	308733
1680	465.094	2665.67	61.4219	79868		1680	565.625	2498.52	125.469	155569		1680	2042.92	470.594	99.6391	308730
1681	1420.68	2569.73	58.5244	79861		1681	2232.17	1959.39	49.8073	155564		1681	1519	2579.69	30.4107	308716
1682	1870.34	2253.95	41.5714	79857		1682	2143.35	2163.34	60.8554	155552		1682	651.357	3170.88	56.7442	308660
1683	405.797	2777.75	71	79829		1683	1615.51	2497.16	56.8765	155497		1683	1482.75	2659.36	25.2571	308512
1684	1256.34	2297.16	41.5049	79813		1684	880.907	2266.16	153.525	155489		1684	2111.57	499.895	102.197	308498
1685	1088.74	2106.56	88.5556	79812		1685	1036.59	2380.36	119.026	155389		1685	2162.73	461.42	78.4286	308490
1686	520.2	2187.78	86.2222	79805		1686	1198.14	2299.14	111.854	155367		1686	2513.05	2526.45	63.2629	308466
1687	315.1	2241.51	104.478	79779		1687	2183.01	2394.27	56.0182	155351		1687	775.446	3098.09	36.6071	308457
1688	1657.96	2149.81	33.4133	79773		1688	606.085	2530.17	100.636	155322		1688	1125.97	2751.39	65.0347	308414
1689	689.593	2888.44	86.314	79765		1689	2087.03	2524.66	40.3496	155293		1689	825.437	3168.99	62.2465	308337
1690	937.193	1997.81	98.5789	79718		1690	2534.25	839.254	195.807	155256		1690	2134.12	414.476	111.113	308310
1691	2215.08	2470.17	60.4886	79710		1691	2098.51	2154.59	39.2151	155238		1691	2256.11	504.7	84.7357	308263
1692	1280.76	2511.04	65.5135	79702		1692	1984.54	2346.87	47.0448	155235		1692	713.321	3010.29	42.8839	308261
1693	1247.06	2360.2	70.8367	79697		1693	1836.8	2354.51	67.0633	155188		1693	2362.66	1181.16	71.1357	308254
1694	1622.55	2124.09	31.2667	79684		1694	1669.62	2298	74	155181		1694	2024.76	2669.29	25.0132	308226
1695	1844.05	2457.75	40.4433	79620		1695	2161.31	2417.63	58.48	155166		1695	2326.69	2757.06	33.8723	308090
1696	872.091	2198.92	96.5	79618		1696	2302.97	2048.7	42.9104	155140		1696	2291.02	493.233	88.9939	308090
1697	526.775	2188.97	88.9775	79607		1697	2079.19	2179.69	55.4806	155018		1697	2188.64	355.889	103.032	308077
1698	954.623	2057.13	61.6393	79600		1698	2078.49	1500.49	115.524	155006		1698	2485.4	372.302	113.849	307969
1699	864.23	2252.99	109.419	79593		1699	881.054	2331.25	153.302	155002		1699	631.953	3308.48	57.6226	307952
1700	541.512	2344.23	63.6071	79588		1700	2503.41	905.159	196.272	155001		1700	775.297	3086.45	29.5446	307922
1701	416.905	2283.19	82.5259	79573		1701	2125.91	2050.1	86.0463	155001		1701	2255.74	566.831	91.9727	307914
1702	322.585	2333.78	80.5854	79560		1702	1966.44	2264.97	48.3382	154987		1702	2307.34	271.163	108.86	307913
1703	794.519	2220.56	101.442	79542		1703	2208.14	2266.93	55.5789	154983		1703	2181.61	668.723	99.4865	307908
1704	1449.13	2337.14	37.7308	79526		1704	1582.16	2359.25	78.2174	154956		1704	989.125	2874.91	64.8684	307871
1705	639.16	2797.08	83.6933	79524		1705	1244.48	2220.78	120.874	154889		1705	593.8	3011.25	61.2462	307785
1706	315.455	2189.32	93.9697	79522		1706	2160.21	2254.53	59.4722	154862		1706	705.553	2775.58	70.9267	307765
1707	1128.37	2095.33	58.5368	79503		1707	2294.82	2417.07	51.4118	154779		1707	2077.13	341.981	94.8491	307758
1708	2039.47	2521.38	48.7091	79484		1708	2168.79	2357.39	74.4375	154773		1708	1806.41	2629.31	37.5	307674
1709	1000.32	2011.06	108.264	79475		1709	1731.34	2412.19	68.1039	154750		1709	2018.45	2664.5	31.7801	307624
1710	2207.65	2471.09	61.4086	79461		1710	2074.04	2318.46	25.4578	154671		1710	2180.46	482.397	112.668	307494
1711	2180.08	2115.1	47.0449	79434		1711	1943.83	2305.16	55.4818	154644		1711	2527.99	2707.57	56.7933	307481
1712	974.862	2187.62	88.6462	79427		1712	2130.11	2382.06	39.5444	154622		1712	2335.2	2904.97	34.0124	307481
1713	1651.66	2440.99	46.2208	79426		1713	2248.06	2093.18	73.8065	154609		1713	978.452	3033.02	71.9881	307452
1714	1048.07	2228.62	62.1522	79417		1714	2163.41	2077.79	72.725	154599		1714	2385.34	2700.66	42.223	307411
1715	540.118	2093.21	121.539	79411		1715	2298.42	2214	43.0194	154584		1715	504.289	2843.9	54.7113	307353
1716	914.783	2277.83	85.7826	79398		1716	1738.27	2331.83	69.3293	154570		1716	2082.11	471.077	94.986	307348
1717	809.104	2539.09	100.179	79392		1717	1190.27	2174.6	115.458	154565		1717	711.164	3220.99	55.1691	307342
1718	581.714	2942.23	79.2143	79370		1718	2169.76	1918.16	63.3918	154484		1718	2087.16	2676.66	23.96	307333
1719	519.475	2187.15	92.5	79355		1719	2271.62	2019.09	32.4737	154440		1719	838.787	2876.83	32.3015	307298
1720	934.867	2433.05	66.48	79348		1720	2311.95	2089.54	59.6264	154436		1720	661.018	3224.69	72.973	307270
1721	1345.05	2315.92	28	79305		1721	1933	2492.49	36.5778	154435		1721	2533.73	2385.27	46.029	307224
1722	451.459	2585.07	110.541	79289		1722	2141.89	2178.63	41.4483	154419		1722	540.266	2771.94	51.1406	307198
1723	1372.58	2057.15	67.6962	79259		1723	2146.22	1941.13	50.6693	154396		1723	645.587	3268.86	66.2464	307162
1724	927.308	2241.23	77.4308	79241		1724	1835.88	2273.38	50.641	154376		1724	1320.56	2670.14	39.8705	307091
1725	855.663	2205.69	82.3625	79239		1725	2072.67	2334.04	83.6372	154352		1725	2318.76	2836.83	19.4	306949
1726	583.419	2641.03	106.113	79239		1726	947.04	2332.11	115.384	154327		1726	2556.78	2731.35	50.9627	306946
1727	366.866	2136.87	109.476	79225		1727	1585.55	2387.86	58.8182	154308		1727	2155.98	342.903	106.968	306919
1728	2056.77	2378.45	51.3494	79221		1728	1789.48	2226.22	75.433	154282		1728	672.199	2877.15	60.75	306878
1729	645.019	2492.32	72.6792	79220		1729	2114.67	2246.09	53.3182	154273		1729	569.497	3249.69	58.5793	306854
1730	1093.31	2155.72	105.918	79207		1730	1016.79	2441.42	115.217	154268		1730	736.367	2790.94	61.2	306752
1731	953.074	2459.27	79.5802	79169		1731	1788.85	2350.36	41.3333	154257		1731	956.184	2739.23	50.0253	306704
1732	496.564	2539.93	93	79154		1732	2259.16	2358.06	66.2066	154222		1732	851.778	2859.22	75.9177	306694
1733	443.987	2890	87.4935	79149		1733	709.515	2443.79	131.045	154128		1733	1311.76	2697.63	35.8095	306682
1734	1079.09	2283.73	105.224	79149		1734	516.173	2423.2	142.602	154118		1734	2161.37	658.565	90.9542	306663
1735	1292.76	2318.91	58.2	79147		1735	978.884	2303.54	122.15	154110		1735	676.754	3167.02	43.9947	306600
1736	437	2817.31	99.3455	79090		1736	691.471	2491.38	121.143	154092		1736	1850.19	2668.75	35.1269	306584
1737	714.566	2358.99	104.964	79081		1737	2263.41	1830.98	70.4793	154084		1737	672.86	3305.11	57.3049	306567
1738	1413.98	2490.12	65	79073		1738	1766.15	2340.43	65.8387	154083		1738	1019.88	2853.27	35.4692	306468
1739	874.928	2420.03	83.4783	79064		1739	2089.33	2209.59	33.2558	154068		1739	2562.56	459.101	106.022	306462
1740	705.361	2186.35	94.4028	79053		1740	2221.84	2282.45	58.4651	154044		1740	1363.47	2709	52.5157	306425
1741	968.95	2391.9	78.3	79039		1741	2134.18	2242.07	48.6806	154040		1741	751.242	3073.53	45.0242	306418
1742	595.011	2262.99	111.495	79031		1742	847.055	2274.14	175.963	154011		1742	2409.18	337.431	101.252	306391
1743	933.893	1975.48	76.5467	79024		1743	1634.1	2305.37	82.866	154010		1743	674.743	3001.11	62.0135	306370
1744	1668.53	2402.79	47.4122	79014		1744	1948.19	2431.32	91.7089	153974		1744	404.386	2931.95	45.0351	306334
1745	695.105	2593.99	96.7105	79012		1745	2117.85	2405.03	48.3028	153966		1745	785.851	3184.25	59.9386	306332
1746	1312.03	2153.86	72.5132	79003		1746	2161.59	2140.53	53.4062	153896		1746	1580.76	2759.14	31.5	306286
1747	1802.92	2554.81	46.098	78997		1747	2061.5	2384.02	72.5116	153896		1747	2466.29	2885.43	32.6912	306234
1748	1767.04	2561.03	60.4416	78995		1748	901.241	2237.11	174.828	153894		1748	2188.75	321.455	123.157	306014
1749	1752.05	2230.86	41.3651	78977		1749	2174.1	1539.21	100.046	153884		1749	599.764	2874.58	50.9514	305893
1750	677.236	2042.11	105.542	78977		1750	2475.83	1033.68	206.636	153856		1750	2285.96	367.381	107.801	305880
1751	1121.03	2276.19	62.3571	78974		1751	677.315	2122.48	142.336	153826		1751	701.925	2875.34	61.2289	305864
1752	714.121	1993.86	99.7241	78964		1752	2183.09	1972.94	56.5294	153809		1752	1381.74	2644.18	33.056	305785
1753	1669.63	2543.81	59.4923	78951		1753	2217.34	2237.25	66.9032	153804		1753	1064.14	2787.83	56.015	305759
1754	1350.56	2252.83	64.4366	78933		1754	2400.98	2051.79	45.8261	153801		1754	2079.93	423.213	108.246	305756
1755	921.703	2110.55	96.3281	78929		1755	2090.02	2461.13	39.4767	153792		1755	532.326	2741.98	43.7029	305655
1756	1371.83	2384.62	67.4026	78924		1756	2567.09	962.034	195.128	153771		1756	2471.66	1958.88	52.8767	305642
1757	1656.97	2540.35	49.5211	78924		1757	1659.73	2349.18	93.5245	153746		1757	810.322	2892.89	32.0805	305613
1758	386.511	2290.79	82.5444	78912		1758	1883.61	2355.36	57.1216	153720		1758	2274.34	590.5	88.9101	305576
1759	1771.83	2260.5	35.4375	78886		1759	2245.9	2528.71	35.5857	153653		1759	769.833	2805.9	67.1176	305512
1760	758.232	2223.24	70.4842	78850		1760	2523.74	866.642	188.755	153624		1760	2387.68	2719.71	55.6258	305490
1761	295.273	2219.44	96.3182	78844		1761	502.475	2515.41	125.854	153620		1761	2111.87	368.982	104.58	305478
1762	578.358	2839.87	78.3881	78843		1762	649.994	2439.93	119.63	153596		1762	2219.05	2782.71	25.1579	305364
1763	2248.6	2140.24	56.4625	78834		1763	1862.97	2500.22	46.5426	153593		1763	2314.76	2917.66	33.9542	305330
1764	1464.99	2308.78	35.675	78816		1764	717.732	2444.91	120.13	153583		1764	2156.2	220.969	121.62	305278
1765	570.324	2650.57	81.0811	78812		1765	1128.51	2391.29	120.047	153582		1765	2205.08	299.838	126.838	305278
1766	707.073	2264.85	72.6909	78810		1766	684.342	2286.61	131.191	153572		1766	1276.45	2656.83	40.5379	305240
1767	788.296	2237.57	64.5612	78807		1767	2239.22	1921.35	93.2869	153497		1767	1312.94	2701.28	22.4059	305215
1768	1855.53	2242.12	37.2031	78795		1768	1802.67	2325.98	72.0081	153486		1768	605.853	2780.17	66.6765	305170
1769	1025.61	2480.21	78.5714	78784		1769	2044.86	2494.66	40.5342	153478		1769	520.185	2857.23	62.8333	305135
1770	1904.35	2041.98	39.8462	78780		1770	641.829	2242.05	157.678	153467		1770	2412.8	284.246	104.078	305094
1771	514.695	2293.58	78	78749		1771	1310.01	2325.12	97.9444	153456		1771	775.815	3160.89	61.8231	305089
1772	1073.33	2180.29	109.524	78741		1772	947.059	2310.53	177.089	153394		1772	2530.16	402.524	109.886	304962
1773	995.989	2437.78	78.3333	78725		1773	1189.67	2228.81	108.063	153381		1773	724.353	3159.4	38.5	304954
1774	1209.21	2137.11	76.7414	78704		1774	921.026	2345.6	102.539	153331		1774	1645.07	2774.53	25.6983	304938
1775	1863.62	2035.38	43.0256	78695		1775	2228.4	2438.13	62.0496	153249		1775	642.57	2933.19	31.8495	304933
1776	582.032	2652.21	63.371	78685		1776	2116.34	2185.69	30.2568	153206		1776	2374.2	582.52	88.9392	304833
1777	1087.97	2243.6	111.691	78664		1777	1737.85	2356.15	74.4796	153162		1777	2318.68	489.615	91.2973	304827
1778	422.964	2351.21	66.5714	78644		1778	2554.54	873.942	205.791	153094		1778	2413.18	534.164	79.4474	304813
1779	1668.16	2641.28	59.3971	78632		1779	2189.58	2093.47	35.2255	153067		1779	2237.7	436.571	86.6836	304812
1780	941.672	2077.79	89.3881	78631		1780	2180.16	2035.13	30.1497	153061		1780	1871.8	2742.95	26.1104	304796
1781	2005.02	2225.38	63.4941	78622		1781	2556.96	862.301	192.316	153047		1781	1992.46	2852.59	20.6505	304779
1782	396	2388.02	98.9375	78622		1782	2254.72	2299.75	21.9701	153036		1782	666.705	3055.19	38.1667	304766
1783	1621.69	2596.09	58.5821	78605		1783	2077.24	2328.89	39.5	153015		1783	530.679	3056.33	48.1927	304751
1784	409.051	2515.55	92.4487	78601		1784	923.809	2490.3	124.487	153015		1784	2333.55	2692.56	27.8908	304627
1785	1257.58	2234.38	42.3194	78584		1785	1782.28	2335.6	99.5408	153003		1785	545.587	2934.59	39.0275	304566
1786	1469.39	2550.61	64	78581		1786	2257.43	2416.12	48.5824	152999		1786	2414.22	622.229	106.098	304556
1787	1057.83	2277.06	70.4286	78557		1787	2532.32	900.768	184.31	152989		1787	634.218	2951.41	47.9864	304527
1788	2126.07	2249.39	49.4598	78536		1788	1077.3	2543.55	92.74	152986		1788	2188.47	291.36	106.516	304511
1789	1855.97	2424.74	41.1681	78535		1789	979.804	2097.7	140.118	152982		1789	601	3097.99	55.1125	304503
1790	1712.6	2389.97	28.4143	78528		1790	2097.2	2043.61	96.8919	152981		1790	1311.76	2593.21	47.1538	304500
1791	610.122	2137.11	88.4459	78493		1791	2600.25	1052.61	218.322	152938		1791	2236.29	393.115	120.115	304417
1792	2045.34	2322.28	51.4605	78491		1792	646.973	2530.67	105.036	152937		1792	837.806	2985.04	57.2158	304369
1793	1279.22	2417.14	55.3968	78489		1793	2409.7	973.676	246.365	152880		1793	512.663	2762.47	55.35	304286
1794	537.1	2577.92	68.6	78476		1794	2216.15	1918.94	51.3558	152872		1794	2261.22	430.493	79.1181	304257
1795	1776.44	2768.21	71.9535	78462		1795	2200.47	2321.67	41.8523	152868		1795	2335.65	1637.8	62.9574	304213
1796	1623.05	2242.63	34.2712	78441		1796	2109.82	2061.52	66.5222	152818		1796	2445.49	2647.62	71.0957	304153
1797	1068.65	2299.35	64	78408		1797	1980.78	2408.7	52.4078	152807		1797	2434.7	2410.48	62.3333	304146
1798	1382.99	2379.52	36.5714	78404		1798	722.907	2356.45	135.804	152795		1798	450.809	3124.34	58.586	304118
1799	1682.74	2103.21	60.7571	78398		1799	1852.11	2410.3	77.3835	152778		1799	2459.88	2895.12	48.8854	304064
1800	1441.3	2352.29	42.4026	78398		1800	2589.22	947.775	233.696	152778		1800	1003.49	2784.68	46.3176	304021
1801	540.875	2224.62	105.696	78397		1801	913.845	2124.82	147.491	152721		1801	2318.05	2220.84	66.274	303926
1802	597.338	2267.94	93.6761	78387		1802	2245	2276.83	58.4375	152710		1802	794.432	3051.64	38.9932	303888
1803	1657.05	2570.46	61.3529	78347		1803	1693.53	2415.7	87.039	152695		1803	977.268	2922.54	62.7517	303887
1804	338.349	2200.11	94.3253	78342		1804	1165.17	2211.64	115.758	152652		1804	583.569	2713.87	57.7236	303824
1805	529.767	2849.28	75.5465	78337		1805	2223.47	2036.61	25.1415	152618		1805	2471.96	529.115	76.2628	303802
1806	1039.94	2127.24	106.565	78331		1806	2127.41	2286.57	46.587	152609		1806	2406.55	2629.88	61.3232	303790
1807	1917.06	2083.19	58.4559	78325		1807	2095.39	2050.57	65.5672	152596		1807	1044.49	2975.76	74.6176	303758
1808	607.923	2133.76	82.7564	78324		1808	2366.1	2013.9	68.5652	152556		1808	2121.99	444.39	119.089	303748
1809	1463.1	2516.1	55.6111	78324		1809	2162.8	2184.61	57.2619	152549		1809	1275.4	2751.35	37.713	303737
1810	348.839	2362.79	103.754	78309		1810	1745.56	2282.69	79.1846	152523		1810	677.081	2951.28	38.9797	303668
1811	577.034	2486.95	58.2045	78309		1811	2164.23	2436.85	39.9741	152515		1811	666.647	2968.88	62.5815	303644
1812	409.18	2247.86	90.4101	78300		1812	2186.26	1930.9	81.4419	152440		1812	452.297	2895.77	57.4903	303587
1813	580.778	2036.38	93.4127	78300		1813	1933.47	2456.57	70.2785	152376		1813	2466.56	2732.29	50.1132	303466
1814	1657.2	2141.9	87.1728	78296		1814	1503.74	2440.23	60.1901	152341		1814	586.944	3074.29	47.232	303453
1815	366.773	2269.57	92.8369	78294		1815	637.315	2175.55	147.993	152259		1815	799.703	3144.71	65.7754	303408
1816	590.309	2947.24	91.7818	78288		1816	2081.43	2272.59	66.6833	152231		1816	1457.23	2525.49	40.1234	303398
1817	1049.54	2104.68	81.6102	78280		1817	674.969	2270.32	133.143	152221		1817	743.557	3014.56	71.7643	303391
1818	1706.59	2184.65	25.7959	78280		1818	2125.09	2063.04	61.2706	152218		1818	2424.58	1825.63	51.6619	303336
1819	1200.21	2332.33	54.4545	78273		1819	510.279	2488.42	122.457	152218		1819	565.701	2757.4	61.5276	303277
1820	683.658	2201.49	81.3797	78266		1820	2037.99	2277.46	44.8	152209		1820	769.342	3036.21	40.4276	303270
1821	1388.83	2108.81	83.4306	78265		1821	1720.61	2376.44	72.9242	152188		1821	588.929	2732.74	65.4841	303205
1822	394.778	2539.53	58.5417	78261		1822	914.832	2440.34	120.88	152142		1822	660.176	2853.82	34.9916	303167
1823	502.283	2119.73	102.7	78258		1823	1106.24	2243.89	142.281	152060		1823	779.889	3145.92	63.5802	303141
1824	552.697	2550.32	77.4091	78252		1824	2191.29	2414.54	70.746	152053		1824	2483.44	1185.02	82.517	303099
1825	275.614	2220.19	100.702	78249		1825	588.113	2314.3	135.413	152048		1825	2317.45	2851.88	39.8757	302994
1826	876.651	2152.08	101.556	78226		1826	2125.53	2318.85	45.1562	152033		1826	693.942	2878.51	52.5372	302993
1827	904.364	2558.53	82.7636	78213		1827	1798.19	2349.3	77.7922	152024		1827	526.154	2819.32	52.6434	302992
1828	1639.16	2167.73	35.5873	78212		1828	2241.97	2244.44	78.6176	152015		1828	1252.21	2720.82	41.6978	302953
1829	754.719	2340.74	61.3684	78197		1829	1906.46	2375.49	63.7164	152003		1829	2290.97	2747.49	31.9115	302939
1830	1555.03	2373.32	44.4851	78168		1830	2152.53	2113.64	59.7391	151991		1830	2149.58	442.992	83.8644	302866
1831	1295.44	2489.36	41.4697	78163		1831	795.288	2410.74	131.561	151957		1831	965.964	2872.7	57.8061	302866
1832	1839.23	2479.08	68.2289	78156		1832	2094.28	2496.86	45.9298	151938		1832	748.067	3098.92	38.7583	302832
1833	1137.62	2129.1	84.0182	78147		1833	1895.57	2395.72	91.5333	151934		1833	863.286	3079.93	39.0571	302810
1834	380.105	2548.8	62.4342	78144		1834	2306.27	2304.11	52.5857	151891		1834	2518.37	1741.6	66.9494	302788
1835	1840.73	2018.28	97.3881	78142		1835	2067.14	2311.63	51.6283	151799		1835	833.532	3194.94	60.2411	302761
1836	1235.51	2515.64	74.4767	78135		1836	710.289	2185.16	136.826	151783		1836	2468.76	638.896	92.974	302744
1837	456.71	2679.93	70.8116	78128		1837	1875.9	2407.57	81.8757	151725		1837	863.697	2803.49	67.2065	302686
1838	1161.8	2334.84	61.2623	78099		1838	754.124	2521.24	120.71	151699		1838	1425.52	2796.4	40.3082	302683
1839	1370.84	2394.5	35.5789	78069		1839	1822.12	2243.24	65.6739	151676		1839	688.091	2843.98	38.4444	302627
1840	715.167	2856.46	82.5778	78019		1840	2151.85	2201.28	64.8182	151673		1840	586.682	3112.28	63.5166	302590
1841	402.988	2190.3	111.568	78019		1841	1803.52	2455.27	60.4153	151667		1841	2289.63	2742.81	50.0864	302565
1842	1274.85	2126.88	37.2466	78016		1842	2395.01	2246.74	48.1236	151639		1842	2264.01	2805.04	31.6087	302406
1843	2029.31	2383.96	48.425	78007		1843	1778.81	2468.28	65.6667	151594		1843	2024.47	2723.79	24.8542	302385
1844	392.704	2567.02	81.0816	77986		1844	2249.84	1979.36	53.5667	151586		1844	743.369	3168.74	61.8156	302355
1845	954.787	2197.27	110.453	77975		1845	951.762	2278.55	144.317	151573		1845	507.975	3187.19	61.2288	302339
1846	673.386	2587.57	62.4429	77975		1846	2036.61	2363.67	60.9231	151544		1846	1201.27	2655.47	37.8175	302301
1847	1700.34	2463.99	41.5634	77968		1847	589.873	2582.54	106.784	151513		1847	2380.83	1288.75	88.2577	302234
1848	820.226	2249.14	115.274	77940		1848	759.256	2164.26	162.558	151507		1848	908.194	3013.76	73.7722	302231
1849	680.733	2525.51	78.48	77925		1849	1794.61	2313.44	72.4588	151455		1849	605.624	2891.92	54.4946	302213
1850	462.276	2143.05	137.561	77915		1850	2501.35	840.924	212.492	151454		1850	607.612	2845.14	70.4412	302176
1851	627.706	2540.75	112.48	77905		1851	874.852	2305.84	164.422	151391		1851	2336.56	508.717	110.26	302147
1852	656.789	2468.5	100.385	77880		1852	2026.5	2298.18	73.9709	151381		1852	2254.15	2824.91	18.5625	302140
1853	691.775	2094.21	77.375	77873		1853	1839.7	2479.81	40.375	151379		1853	1827.56	2657.65	33.4754	302119
1854	978.897	2089.91	60.6471	77843		1854	2241.13	2224.98	49.0323	151370		1854	644.076	3125.62	61.0833	302088
1855	616.759	2782.25	82.4337	77842		1855	1647.3	2323.63	92.023	151340		1855	2332.4	1050.86	92.6352	302087
1856	2030.59	2164.46	48	77821		1856	845.031	2548.61	125.938	151336		1856	2141.53	538.12	103.232	302049
1857	822.588	2503.12	96.7794	77821		1857	2123.93	2036.22	67.7128	151270		1857	795.336	3066.25	42.9732	302041
1858	504.903	2177.43	118.056	77804		1858	2097.04	2282.68	77.7403	151193		1858	2482.92	2780.04	51.1724	302004
1859	1006.66	2139.1	55.18	77791		1859	2176.54	1579.2	102.461	151143		1859	983.452	2953.1	55.875	301995
1860	329.7	2251.26	79.86	77790		1860	2251.11	2224.88	64.575	151139		1860	701.658	2912.36	36.1484	301961
1861	1671.76	2245.69	32.8017	77774		1861	768.432	2174.27	172.554	151122		1861	554.889	3127.52	44.8571	301943
1862	633.204	2091.2	82.0816	77769		1862	2076.83	2282.37	52.3398	151116		1862	2298.27	208.239	121.924	301919
1863	371.633	2149.03	108.444	77766		1863	2129.36	2264.32	46.1983	151116		1863	2158.79	463.244	101.643	301874
1864	1173.31	2364.06	88.3951	77762		1864	1008.58	2442.88	109.14	151104		1864	655.424	2990.95	44.1304	301873
1865	547.238	2028.6	96.2381	77748		1865	2283.29	2122.15	52.9756	151075		1865	715.689	3053.11	45.2295	301836
1866	2006.84	2803.79	79.4945	77744		1866	1693.45	2420.22	44.6	151066		1866	837.538	3068.49	39.5326	301781
1867	298.778	2153.32	87.8111	77734		1867	1889.75	2458.3	66.5375	151057		1867	593.267	2817.06	57.9704	301768
1868	1176.98	1983.45	68.3208	77725		1868	2061.54	2269.73	36.4789	151044		1868	887.24	3080.84	54.4574	301766
1869	1254.93	2374.77	65.4384	77722		1869	1211.9	2170.91	122.648	151043		1869	616.045	2817.31	51.9103	301764
1870	417.883	2326.12	96.5455	77710		1870	2047.56	2346.86	61.5	151027		1870	538.528	2929.31	41.2037	301687
1871	623.494	2785.25	82.5556	77707		1871	2142.53	1959.05	91.0211	151022		1871	559.014	2970.26	71.2817	301645
1872	963.8	2548.55	78.5455	77674		1872	2086.92	2229.85	77.1902	150990		1872	2274.35	990.783	91.9889	301621
1873	473.211	2637.82	67.807	77652		1873	2155.26	1586.63	90.5824	150882		1873	1555.28	2657.45	29.6554	301614
1874	504.745	2694.98	81.1277	77631		1874	2302.59	1974.85	27.5632	150878		1874	639.156	2731.18	62.8074	301606
1875	448.301	2245.47	114.521	77595		1875	2562.16	948.658	204.199	150872		1875	2599.71	2275.77	51.8403	301566
1876	1865.52	2516.36	46.3939	77551		1876	2311.41	2098.37	52.5897	150698		1876	2393.31	2748.65	44.6275	301546
1877	598	2593.12	59.0606	77547		1877	735.721	2253.34	128.13	150689		1877	794.088	2828.94	69.096	301520
1878	435.093	2241.22	96.5116	77546		1878	2248.9	2179.18	49.0348	150688		1878	2352.13	348.127	118.198	301481
1879	632.029	2118.09	91.5	77537		1879	1937.21	2522.09	49.5327	150683		1879	514.711	3306.69	57.2544	301470
1880	1782	2050.22	45.6029	77533		1880	2309.73	2367.22	45.359	150663		1880	2488.91	2633.09	67.8098	301416
1881	701.833	2644.13	66.3148	77513		1881	2150.27	2007	92.2366	150635		1881	510.533	2883.87	46.1053	301403
1882	676.102	2483.8	103.204	77511		1882	1791.53	2563.92	44.1717	150622		1882	1555.91	2660.77	39.1479	301384
1883	592.232	2586.91	99.4058	77510		1883	1077.38	2027.12	138.045	150594		1883	628.986	2910.74	63.0208	301355
1884	613.22	2094.14	87.8475	77500		1884	2090.58	2250.95	92.6538	150574		1884	961.152	3040.37	71.6067	301349
1885	1092.39	2360.02	63.1186	77493		1885	2175.08	2066.82	68.9722	150525		1885	1275.55	2628.43	46.1583	301336
1886	1807.73	2377.81	65.5393	77490		1886	2166.09	2300.71	46.7636	150483		1886	822.645	2937.33	78.5248	301317
1887	745.23	2191.32	81.5946	77490		1887	2084.78	2402.54	70.57	150472		1887	2029.71	443.019	105.094	301315
1888	445.576	2539.97	57.3051	77457		1888	2581.02	841.479	179.613	150456		1888	1735.01	2600.39	39.9767	301257
1889	1989.86	2213.45	37.6232	77448		1889	878.312	2543.11	93.2143	150429		1889	427.939	2799.16	58.4242	301223
1890	545.975	2452.28	102.543	77439		1890	1720.19	2513.6	58.3146	150426		1890	869.685	2969.52	72.3065	301164
1891	2171.66	2577.01	59.602	77410		1891	2604.62	814.695	191.159	150409		1891	467.563	2807.93	43.5126	301096
1892	438.949	2331.89	62.4051	77391		1892	2114.13	2274.5	47.376	150383		1892	847.239	3080.36	62.6101	301060
1893	1156	2517.03	77.58	77365		1893	830.761	2521.1	117.126	150368		1893	1222.42	2676.7	57.8038	301042
1894	520.016	2383.49	112.377	77350		1894	705.28	2475.02	125.136	150332		1894	2243.8	351.801	121.205	301033
1895	1065.06	2189.66	66.6618	77337		1895	2236.27	2218	68.5934	150332		1895	520.209	2892.57	49.1364	300992
1896	1066.59	2184.95	54.5745	77334		1896	917.039	2503.66	115.855	150293		1896	1099.76	2842.72	55.0625	300960
1897	1194.77	2110.1	81.5532	77332		1897	2283.23	1917.51	49.9327	150290		1897	599.219	3029.82	63.1598	300897
1898	1911.15	2193.39	42.4086	77319		1898	2083.19	2423.39	86.7955	150262		1898	826.21	3091.48	52.7972	300850
1899	1054.53	2420.57	62.8511	77310		1899	566.254	2437.27	121.049	150226		1899	2212.99	773.557	99.4027	300818
1900	363.848	2150.3	106.405	77289		1900	2138.02	2342.97	81.1038	150221		1900	2390.71	405.356	92.8528	300799
1901	909.846	2346.26	97.3846	77285		1901	678.46	2584.86	99	150205		1901	2197.32	2717.29	30.9203	300757
1902	1674.25	2175.42	34.382	77281		1902	1708.1	2440.59	54.819	150200		1902	604.716	3200.25	62.7095	300735
1903	1597.12	2468.92	68.36	77266		1903	1653.57	2492.19	49.129	150192		1903	500.206	2817.05	62.1742	300717
1904	936.444	2487.56	76.7778	77232		1904	1891.48	2300.33	49.5862	150188		1904	1631.64	2676.12	27.6346	300712
1905	1652.48	2080.68	79.0351	77220		1905	1272.07	2323.36	87.5114	150184		1905	814.955	2987.13	36.974	300701
1906	607.839	2745.99	72.8686	77214		1906	1137.19	2131.05	116.247	150180		1906	817.373	3066.62	72.6158	300649
1907	917.984	2406.97	58.4127	77213		1907	766.129	2442.77	170.49	150130		1907	815.585	3093.34	56.5782	300636
1908	564.967	2625.89	55.4426	77195		1908	1629.31	2327.48	70.9695	150082		1908	843.719	2880.77	63.9111	300605
1909	1692.56	2215.49	39.5254	77193		1909	1858.95	2417.5	88.991	150070		1909	2435.52	2740.57	47.5283	300546
1910	440.717	2211.7	90.4674	77163		1910	1847.51	2436.33	44.4	150037		1910	896.717	2954.17	76.6096	300469
1911	1210.66	2248.1	48.5195	77151		1911	856.614	2256.91	179.981	150018		1911	1328.05	2577.51	45.5735	300425
1912	549.58	2387.99	87.7101	77123		1912	2296.78	2219.27	25.4458	150007		1912	960.689	2925.24	34.8778	300407
1913	1382.6	2182.63	38.6027	77117		1913	2109.63	2311.91	56.1919	149995		1913	580.496	2813.97	61.295	300373
1914	2498.63	2708.62	100.321	77115		1914	2337.06	2052.32	35.0569	149989		1914	2436.8	365.745	116.873	300373
1915	343.31	2154.55	109.126	77107		1915	1681.38	2285.25	80.5417	149984		1915	1041.14	2731.94	44.4839	300367
1916	371.734	2577.16	73.5823	77104		1916	2101.47	2254.09	68.4369	149980		1916	2516.72	2622.26	50.0427	300366
1917	1199.91	2389.11	65.6204	77101		1917	845.37	2492.9	100.281	149944		1917	2066.74	542.4	89.6581	300342
1918	419.239	2343.01	60.6056	77095		1918	951.462	2334.87	140.759	149941		1918	1242.5	2792.99	39.1319	300305
1919	301.946	2193.85	109.514	77092		1919	2159.27	1867.64	97.0769	149922		1919	2480.36	2294.49	49.3979	300304
1920	1347.81	2174.42	55.71	77084		1920	2049.52	2491.74	43.8506	149916		1920	2153.95	366.427	80.9818	300295
1921	1031.69	2024.94	69.5139	77071		1921	2299.32	2013.32	23.8333	149913		1921	2306.86	935.645	93.1479	300288
1922	378.061	2673.15	77.6364	77054		1922	2047.99	2253.86	87.9603	149904		1922	694.93	3261.76	51.0703	300275
1923	1704.38	2286.33	53.9167	77041		1923	1634.38	2273.96	65.1863	149877		1923	2187.95	410.7	77.1917	300271
1924	915.186	2394.2	67.5286	77036		1924	2354.21	2030.38	42.4818	149829		1924	1349.64	2725.37	26.7073	300232
1925	1799.63	2332.52	32.3881	77028		1925	2127.68	1982.2	80.275	149820		1925	676.893	3011.59	56.1356	300200
1926	1556.97	2178.05	74.2021	77024		1926	811.684	2473.13	103.857	149809		1926	2514.59	405.627	90.9933	300169
1927	656.614	2134.26	133.333	76979		1927	991.816	2497.58	92.068	149797		1927	947.957	2734.62	48.3381	300126
1928	588.667	2106.74	84.6842	76972		1928	1991.53	2268.71	68.5517	149795		1928	2474.53	1556.38	74.1505	300088
1929	1021.65	2228.04	108.469	76950		1929	2210.95	984.811	234.568	149737		1929	1716.55	2670.82	21.1563	300081
1930	1707.19	2368.6	25.4478	76943		1930	1590.33	2437.82	66.3579	149713		1930	2414.42	1405.26	64.7733	300068
1931	1078.74	2482.77	75.3108	76942		1931	2287.05	2145.15	64.2674	149696		1931	2152.41	438.504	88.0593	300056
1932	820.373	2600.33	78.3433	76940		1932	2631.73	951.158	185.337	149664		1932	574.872	2938.52	63.5061	300050
1933	987.784	2096.26	92.5946	76938		1933	704.146	2563.8	113.746	149653		1933	1518.17	2648.71	53.0972	300013
1934	517.972	2845.86	84.5278	76930		1934	2064.53	2340.14	45.0843	149612		1934	799.219	3034.81	56.25	299979
1935	1952.21	2157.05	28.4302	76919		1935	707.297	2388.33	131.588	149609		1935	1560.89	2573.92	37.024	299946
1936	1735.37	2251.22	59.4851	76898		1936	2122.28	2136.02	67.4623	149588		1936	2365.97	2724.22	43.6379	299818
1937	1798.22	2309.38	37.6825	76860		1937	2146.83	1240.53	159.445	149577		1937	2297.65	2885.28	28.3651	299779
1938	1683.99	2601.1	53.6471	76845		1938	2021.52	2304.59	50.3562	149577		1938	607.302	3002.89	43.845	299712
1939	719.103	2565.97	85.1471	76796		1939	1989.38	2222.4	55.5333	149525		1939	2102.26	431.861	118.454	299687
1940	339.648	2563.94	76.7222	76789		1940	1605.57	2307.16	89.3504	149488		1940	2142.83	400.234	86.955	299609
1941	712.114	2138.68	76	76785		1941	1933.66	2363.93	36.4884	149473		1941	2340.44	2847.7	35.4225	299578
1942	1537.94	2548.38	70.14	76771		1942	1757.8	2326.06	75.1509	149464		1942	1397.71	2693.6	40.4412	299551
1943	1171.93	2140.08	76.0755	76752		1943	667.485	2293.29	136.022	149457		1943	740.913	3147.63	67.8733	299496
1944	1972.54	2559.48	50.6049	76724		1944	1187.82	2329.19	99.1597	149405		1944	2213.62	448.262	121	299460
1945	786.919	2743.52	86.4884	76703		1945	902.373	2536.72	94.1695	149392		1945	1353.5	2583.08	31.5821	299448
1946	471.889	2504.89	84.4889	76684		1946	1547.6	2498.66	53.6395	149380		1946	2330.95	2878.58	27.4458	299440
1947	1248.85	2201.25	73.3443	76674		1947	534.336	2546.05	115.788	149332		1947	2263.87	2885.07	26.055	299437
1948	570.769	2518.6	103.631	76664		1948	1908.51	2458.65	40.5243	149322		1948	474.418	2873.95	58.1148	299425
1949	447.85	2333.27	61.15	76655		1949	2148.31	1966.32	87.2766	149309		1949	2296.2	1098.66	97.3767	299220
1950	1690.09	2407.63	34.4771	76649		1950	858.876	2189.19	163.555	149298		1950	2019.9	2735.21	34.325	299218
1951	940.475	2040.12	82.45	76608		1951	1890.28	2289.05	76.4875	149235		1951	2077.84	394.586	94.8672	299176
1952	990.432	2371.25	94.5432	76599		1952	1170.97	2324.1	115.06	149204		1952	2403.98	2691	29.5507	299167
1953	1410.34	2279.44	66.5	76581		1953	2193.22	2153.76	66.6471	149148		1953	868.109	2845.34	57.0504	299137
1954	1193.52	2004.69	79.3962	76546		1954	588.26	2436.06	119.927	149136		1954	2547.29	2266.97	63.1508	299133
1955	447.115	2710.83	103.484	76543		1955	2140.85	2393	50.7327	149133		1955	2620.69	2613.96	33.6136	299109
1956	586.955	2462.09	61.2386	76531		1956	2134.22	2237.67	88.9921	149096		1956	873.789	3155.28	65.7303	299072
1957	507.403	2497.75	105.571	76507		1957	2254.74	2053.15	29.8452	149089		1957	2161.28	408.456	107.825	299028
1958	1139	2016.8	58.5333	76496		1958	2048.06	2247.05	48.8218	149073		1958	1344.96	2701.53	23.5455	299010
1959	1855.83	2584.86	68.9158	76489		1959	1101.71	2396.57	129.012	149037		1959	2227.87	2858.58	22.9293	299000
1960	358.319	2263.7	85.6232	76478		1960	2298.57	1928.45	83.3491	148987		1960	2290.2	1380.43	81.5688	298999
1961	1069.73	2082.67	83.7091	76466		1961	895.37	2257.99	145.815	148967		1961	2355.2	239.49	121.821	298976
1962	1321.15	2474.59	67.5333	76454		1962	2136.64	2026.42	68.2791	148918		1962	2101.83	336.758	108.939	298960
1963	1780.57	2602.24	54.5658	76449		1963	1852.37	2522.9	48.254	148916		1963	956.115	2898.88	54.0687	298912
1964	447.073	2465.34	62.2561	76449		1964	2450.16	943.774	180.805	148908		1964	436.907	2967.73	56.3488	298903
1965	600.153	2271.49	107.486	76440		1965	1198.76	2286.57	116.427	148876		1965	552.277	2770.18	40.5308	298849
1966	1012.26	2440.59	64.061	76437		1966	2405.62	2105.65	46.5625	148862		1966	1152.58	2844.93	66.8993	298829
1967	524.612	2811.78	86.2449	76428		1967	1995.45	2284.46	39.1495	148854		1967	1156.09	2699.28	46.3397	298798
1968	1252.88	2362.26	53.4861	76419		1968	2224.29	2256.6	50.1455	148815		1968	2257.62	1803.88	56.0897	298785
1969	736.485	2175.76	68.3939	76410		1969	1751.27	2320.19	96.2661	148767		1969	2335.66	1320.95	79.1618	298773
1970	1662.91	2133.49	96.5	76404		1970	2208.33	1831.03	77.92	148750		1970	2161.98	2625.28	45.9298	298769
1971	619.268	2688.49	92.567	76396		1971	2304.78	1861.58	74.1789	148748		1971	998.245	2883.12	59.9694	298764
1972	423.621	2644.8	87.9158	76384		1972	2090.35	2316.11	72.7952	148744		1972	759.054	2924.19	41.3692	298762
1973	440.192	2911.29	90.2222	76380		1973	1591.85	2447.05	61.0099	148734		1973	1053.71	2853.66	59.8235	298757
1974	430.123	2290.59	96.2469	76371		1974	2048.9	2282.19	43.963	148725		1974	2453.52	483.306	90.5041	298752
1975	792.833	1973.48	86.1667	76346		1975	2192.09	1518.63	109.397	148723		1975	2288.41	316.681	104.274	298733
1976	651.529	2195.59	68.8966	76345		1976	2312.31	2229.07	74.9452	148697		1976	533.676	3239.06	54.9333	298709
1977	498.465	2727.65	88.2817	76341		1977	1948.52	2441.71	67.0722	148654		1977	2217.07	469.331	116.298	298651
1978	1077.27	2378.63	78.3898	76320		1978	746.313	2441.44	102.737	148639		1978	915.233	2814.72	64.3023	298645
1979	872	1970.49	85.4068	76289		1979	1660.37	2443.58	69.494	148618		1979	499.215	2763.28	50.2692	298590
1980	414.171	2769.06	74.3659	76281		1980	2558.82	1079.88	212.08	148572		1980	2323.49	2683.23	37.1716	298589
1981	1357.33	2102.6	72.4878	76269		1981	2271.04	1693.84	94.8867	148544		1981	2286.08	1464.55	73.9454	298461
1982	707.817	2314.38	96.3521	76246		1982	2170.38	2213.39	50.4135	148448		1982	2152.15	2855.94	27.6894	298456
1983	1098.04	2115.14	93.4343	76238		1983	2604.34	961.97	207.735	148406		1983	885.351	2860.11	48.8702	298451
1984	1702.5	2266.31	28.4853	76233		1984	2270.56	2389.38	61.6835	148354		1984	2322.85	574.673	84.7756	298441
1985	433.821	2172.37	102.299	76221		1985	2090.41	2248.73	45.4312	148352		1985	1520.65	2637.27	33.5328	298435
1986	2847.91	2569.74	125.906	76204		1986	2257.77	2154.06	57.0345	148328		1986	2090.34	494.89	114.571	298423
1987	1596.28	2476.88	60.494	76174		1987	2278.98	1958.59	60.0964	148314		1987	2340.81	423.424	90.0265	298376
1988	709.716	2382.67	104.138	76173		1988	2084.37	2254.16	45.52	148298		1988	493.602	2864.94	51.708	298231
1989	1071.28	1957.45	104.471	76167		1989	2378.58	2057.46	64.6	148294		1989	1081.27	2772.67	54.0928	298216
1990	1792.67	2654.65	52.6735	76164		1990	974.372	2545.91	106.713	148270		1990	631.361	3040.62	35.3333	298134
1991	807.662	2557.93	85.5775	76149		1991	2221.26	2289.03	43.9633	148256		1991	640.835	2899.47	73.4734	298118
1992	1248.25	2268.26	93.5714	76133		1992	1113.9	2080.95	151.72	148236		1992	1350.31	2716.71	33.8824	298054
1993	2052.2	2705.79	70.4889	76126		1993	1798.78	2347.31	89.5464	148231		1993	2257.17	756.467	91.8107	298048
1994	792.177	2725.82	93.629	76116		1994	1920.97	2336.48	66.4457	148203		1994	1117.7	2870.65	45.0922	298026
1995	694.063	2584.03	86.4051	76108		1995	816.186	2486.49	108.543	148151		1995	511.248	2712.36	46.9725	298018
1996	319.055	2277.79	110.989	76107		1996	2234.28	1507.77	110.747	148149		1996	2156.2	463.078	93.5391	298012
1997	1735.04	2520.51	46.6026	76088		1997	1902.71	2361.35	39.8718	148148		1997	574.708	3176.97	68.7692	297999
[truncated: 41,051 more rows]

## Sheet: Figure 3
Figure 3A				Figure 3B							Figure 3C							Figure 3D							Figure 3E
Distance (nm)	AZ 1	AZ 2		DPM							APL							⍺/β KC							DPM	APL	γ KCs	α'/β' KCs	α/β KCs
0	80.087	77.604		Volume histogram		Intensity histogram		Scatter plot			Volume histogram		Intensity histogram		Scatter plot			Volume histogram		Intensity histogram		Scatter plot			0.304415	0.325348	0.484359	0.592762	0.708617
39.5	128.522	162.207		Bin Center	% Frequency	Bin Center	% Frequency	Volume (Vox.)	Integrated intensity		Bin Center	% Frequency	Bin Center	% Frequency	Volume (Vox.)	Integrated intensity		Bin Center	% Frequency	Bin Center	% Frequency	Volume (Vox.)	Integrated intensity		0.355621	0.294365	0.515624	0.574321	0.671655
79	267.319	393.238		40	0.0189018	20	0.0378143	137.874	484.439		40	0.075287	20	0.282619	342.777	1817.11		20	0.0821549	0	0.0049802	283.941	538.97		0.320492	0.322532	0.452633	0.585185	0.721539
118.5	875.703	1259.4		50	0.236273	30	0.921724	137.874	456.504		50	0.611707	30	1.24352	291.995	1524.85		30	0.450607	10	0.114545	302.26	515.274		0.230149	0.248745	0.455565	0.587163	0.644731
158	2108.62	3096.61		60	5.11766	40	5.30819	166.598	454.337		60	5.76887	40	3.50447	268.191	1347.62		40	1.51364	20	1.07074	207.613	479.221		0.237546	0.321737	0.096882	0.439727	0.673272
197.5	4351.52	6450.56		70	20.4376	50	10.2288	153.194	425.921		70	14.9633	50	7.22562	204.714	1014.98		50	3.67706	30	2.8935	228.985	459.731		0.27913		0.466477
237	7731.29	11682.1		80	13.5857	60	12.1242	151.279	418.123		80	11.6977	60	9.58078	206.301	942.652		60	5.97739	40	5.11467	280.888	456.438
276.5	10294.4	16175.6		90	9.67772	70	11.9682	137.874	417.289		90	11.9142	70	10.6924	177.736	796.375		70	9.73661	50	7.02209	231.02	448.675
316	12203.9	18270		100	9.58794	80	9.85536	153.194	406.305		100	14.7374	80	10.6171	130.128	646.99		80	12.2759	60	8.33935	195.4	425.165
355.5	12306.7	17385		110	11.5443	90	7.88429	130.215	399.089		110	12.4506	90	10.0707	147.584	482.783		90	13.8618	70	9.40013	281.905	418.434
395	9809.5	13166.8		120	9.18155	100	6.75931	137.874	390.984		120	11.4342	100	9.10975	172.975	480.079		100	13.1722	80	9.48978	181.152	405.933
434.5	6759.56	8299.21		130	7.97656	110	5.62488	147.449	388.489		130	8.29098	110	7.62129	107.911	440.069		110	10.2569	90	9.27065	234.073	402.838
474	3413.49	4351.52		140	5.85483	120	4.47627	134.044	383.999		140	3.73612	120	6.78285	114.259	432.826		120	9.31836	100	8.63567	211.684	401.055
513.5	1308.74	1713.63		150	3.40705	130	3.97523	105.321	381.319		150	1.69396	130	5.04946	123.78	416.363		130	6.68691	110	7.45786	245.268	397.233
553	548.213	604.182		160	1.83348	140	3.36075	135.959	374.282		160	0.865801	140	4.37117	98.3896	401.938		140	4.59072	120	6.06838	194.382	389.478
592.5	174.957	204.847		170	0.557603	150	2.90225	151.279	370.971		170	0.489366	150	3.31606	119.02	378.341		150	3.11442	130	5.2566	233.055	385.51
632	94.808	65.501		180	0.392212	160	2.34449	137.874	368.321		180	0.254094	160	2.87329	123.78	373.674		160	2.01404	140	4.30041	192.347	385.011
				190	0.174842	170	2.10815	172.343	366.362		190	0.235272	170	2.08196	117.433	364.221		170	1.24726	150	3.50606	211.684	378.685
				200	0.10396	180	1.99471	103.406	366.318		200	0.169396	180	1.56382	119.02	344.382		180	0.809102	160	2.47516	146.55	373.606
				210	0.0661563	190	1.55511	111.065	365.821		210	0.141163	190	1.04569	115.846	333.576		190	0.49044	170	2.12904	238.144	373.078
				220	0.0378036	200	1.47003	176.173	365.663		220	0.112931	200	0.932642	165.041	333.241		200	0.234017	180	1.636	149.603	368.197
				230	0.0425291	210	1.1297	141.704	363.527		230	0.0564653	210	0.546397	134.889	308.582		210	0.21908	190	1.34465	184.205	365.413
				240	0.0236273	220	0.926451	130.215	362.527		240	0.0658762	220	0.433349	145.998	306.424		220	0.0896236	200	0.97363	237.126	361.312
				250	0.00472545	230	0.718472	122.555	359.434		250	0.0470544	230	0.30146	122.194	305.459		230	0.0672177	210	0.796833	177.081	360.448
				260	0.0189018	240	0.505767	164.683	358.664		260	0.00941088	240	0.207254	168.215	304.359		240	0.0473013	220	0.582684	275.799	360.103
				270	0.0330782	250	0.392324	93.8311	358.605		270	0.0376435	250	0.131889	122.194	302.417		250	0.0224059	230	0.525411	224.914	359.382
				280	0.0094509	260	0.363963	197.237	358.344		280	0.0188218	260	0.131889	130.128	301.345		260	0.0149373	240	0.356085	212.701	358.324
				290	0.0189018	270	0.297788	128.3	358.11		290	0.0282326	270	0.0565238	114.259	298.547		270	0.00746863	250	0.318733	197.436	357.846
				300	0	280	0.226886	157.023	356.955		300	0.0188218	280	0.0565238	93.6288	298.172		280	0.00995818	260	0.221619	175.046	356.877
				310	0.0189018	290	0.122897	130.215	342.781		310	0.0282326	290	0.0188413	138.063	295.183		290	0.00497909	270	0.161857	171.993	355.203
				320	0.0141764	300	0.108716	109.15	342.406		320	0.00941088	300	0.0565238	125.367	289.812		300	0.00746863	280	0.134465	213.719	354.318
				330	0	310	0.0992626	128.3	340.141		330	0.00941088	310	0.0282619	134.889	287.542		310	0	290	0.0821734	198.453	353.672
				340	0.0141764	320	0.0472679	143.619	339.013		340	0.0188218	320	0	209.475	284.469		320	0	300	0.0747031	209.648	352.262
				350	0	330	0.0378143	101.491	336.758		350	0	330	0.0188413	107.911	284.092		330	0	310	0.0522921	204.56	351.499
				360	0	340	0.0283607	197.237	336.684		360	0	340	0.00942063	457.036	277.574		340	0	320	0.0398416	173.011	350.944
				370	0.00472545	350	0	114.895	334.298		370	0	350	0	136.476	276.581		350	0	330	0.0547822	230.002	350.606
				380	0.00472545	360	0.0378143	135.959	332.895		380	0	360	0.00942063	179.323	275.228		360	0	340	0.0199208	177.081	348.501
				390	0	370	0.0330875	145.534	331.588		390	0	370	0.00942063	114.259	275.081		370	0	350	0.0273911	221.861	347.841
				400	0	380	0.00945358	122.555	331.457		400	0.00941088	380	0.00942063	114.259	273.653		380	0	360	0.0199208	184.205	346.955
						390	0.00945358	135.959	330.4		400	0.00941088	390	0	131.715	270.92		390	0	370	0.00996041	187.259	346.835
						400	0.00472679	143.619	330.118				400	0.00942063	136.476	269.887		400	0	380	0.0024901	149.603	345.856
								183.832	327.989						123.78	268.486				390	0.00747031	189.294	344.263
								151.279	327.188						139.65	267.487				400	0.00747031	177.081	343.806
								137.874	324.932						141.237	266.751						187.259	342.628
								109.15	323.763						136.476	264.102						193.365	341.724
								111.065	323.575						98.3896	263.786						227.967	337.648
								132.129	322.102						115.846	263.126						174.028	337.253
								137.874	321.629						136.476	262.426						169.957	336.571
								122.555	320.276						77.7595	262.261						221.861	336.204
								124.47	320.249						104.737	261.819						178.099	334.782
								126.385	318.775						122.194	261.618						179.117	334.771
								172.343	316.816						112.672	261.224						265.622	333.408
								120.64	316.389						153.932	261.155						210.666	332.735
								122.555	313.927						79.3465	260.822						149.603	332.376
								118.725	313.326						79.3465	257.098						161.816	331.989
								141.704	312.152						115.846	255.956						199.471	331.41
								185.747	311.978						119.02	255.615						176.064	331.003
								114.895	311.893						123.78	255.5						227.967	330.648
								145.534	311.366						120.607	252.418						212.701	330.598
								103.406	311.252						112.672	251.239						189.294	329.916
								82.3415	310.776						125.367	251.145						264.604	329.105
								149.364	310.197						182.497	250.743						212.701	328.234
								116.81	309.795						111.085	250.414						181.152	327.896
								126.385	309.385						128.541	249.151						243.233	327.367
								126.385	309.279						87.2811	248.125						236.109	326.837
								135.959	308.996						69.8249	247.408						263.587	326.207
								126.385	308.703						125.367	247.084						259.516	326.203
								135.959	308.618						136.476	246.328						194.382	326.164
								67.0222	307.808						115.846	246.256						220.843	325.956
								107.235	307.648						112.672	246.08						211.684	325.736
								134.044	306.561						136.476	245.155						215.754	325.384
								126.385	306.381						139.65	245.117						190.312	323.986
								114.895	306.006						84.1073	243.362						180.135	323.657
								105.321	305.523						96.8027	242.821						173.011	320.533
								147.449	304.938						104.737	242.44						180.135	319.859
								120.64	303.422						138.063	241.336						212.701	319.084
								120.64	303.006						115.846	241.003						186.241	319.038
								128.3	302.408						128.541	239.269						214.737	318.718
								155.108	302.133						161.867	238.873						166.904	318.657
								139.789	301.103						182.497	238.863						184.205	318.201
								143.619	300.274						114.259	238.609						211.684	318.003
								116.81	299.994						149.171	238.576						199.471	317.515
								103.406	299.546						182.497	237.87						299.207	317.189
								141.704	299.483						115.846	237.652						149.603	316.15
								143.619	298.238						122.194	237.436						192.347	315.591
								101.491	298.092						122.194	237.428						210.666	315.336
								170.428	297.934						119.02	236.994						179.117	315.072
								84.2565	297.249						123.78	236.215						196.418	314.724
								118.725	297.235						106.324	235.945						132.302	314.199
								116.81	297.186						111.085	235.719						155.71	314.112
								120.64	297.165						138.063	235.319						236.109	312.905
								95.746	296.724						128.541	235.293						211.684	312.75
								130.215	296.189						92.0419	235.262						171.993	312.663
								111.065	296.061						123.78	235.113						179.117	311.374
								137.874	295.637						103.15	234.512						198.453	309.19
								124.47	295.439						117.433	234.414						139.426	309.087
								130.215	295.423						142.824	234.313						134.338	308.78
								151.279	294.974						115.846	233.492						185.223	308.486
								118.725	294.414						123.78	232.782						159.78	308.403
								164.683	293.042						133.302	232.665						195.4	307.887
								80.4266	292.729						134.889	232.382						201.506	307.57
								74.6819	292.308						136.476	231.565						179.117	307.23
								101.491	291.941						87.2811	231.523						177.081	306.881
								118.725	291.62						72.9988	231.427						159.78	306.664
								107.235	291.473						104.737	231.402						195.4	306.553
								126.385	291.435						133.302	231.318						180.135	306.442
								116.81	291.177						122.194	231.152						148.586	306.01
								103.406	290.557						114.259	230.359						224.914	305.882
								109.15	290.34						111.085	230.329						162.833	304.941
								147.449	289.84						133.302	229.152						149.603	304.356
								78.5117	288.875						111.085	228.905						195.4	304.205
								128.3	288.263						114.259	228.901						163.851	303.392
								124.47	288.225						120.607	228.8						184.205	302.768
								80.4266	288.212						131.715	228.099						143.497	302.478
								151.279	287.796						133.302	227.948						142.479	302.365
								118.725	287.475						119.02	227.694						153.674	301.191
								130.215	286.972						139.65	227.55						148.586	301.149
								132.129	286.766						114.259	227.177						147.568	299.87
								128.3	286.393						125.367	227.156						149.603	299.727
								126.385	286.056						112.672	227.102						155.71	299.05
								72.7669	285.717						120.607	227.005						131.285	299.021
								132.129	285.246						112.672	226.98						189.294	298.934
								132.129	285.222						106.324	226.852						148.586	298.595
								120.64	284.841						114.259	226.817						212.701	298.551
								99.5758	284.475						142.824	226.404						221.861	298.389
								105.321	284.17						74.5857	226.258						191.329	298.377
								147.449	283.822						138.063	224.32						155.71	298.2
								143.619	283.727						126.954	224.259						217.79	297.939
								114.895	283.692						117.433	223.995						143.497	297.753
								141.704	283.588						128.541	223.834						205.577	297.59
								212.556	283.249						101.563	222.917						171.993	297.543
								120.64	282.537						138.063	222.82						147.568	297.444
								128.3	282.403						144.411	222.707						116.019	297.058
								111.065	282.194						150.758	222.686						186.241	296.9
								157.023	282.183						109.498	222.548						186.241	296.763
								128.3	282.091						65.0641	222.01						159.78	296.716
								111.065	282.004						123.78	221.89						152.656	296.378
								91.9161	281.844						165.041	221.815						217.79	295.305
								130.215	281.789						125.367	221.809						182.17	294.891
								107.235	281.784						119.02	221.74						200.489	294.596
								126.385	281.64						104.737	221.704						203.542	294.164
								122.555	281.308						128.541	221.673						133.32	293.803
								141.704	281.278						101.563	221.501						183.188	291.593
								126.385	281.273						119.02	221.404						170.975	291.404
								109.15	280.601						114.259	221.229						171.993	291.34
								128.3	280.498						92.0419	220.489						259.516	291.014
								74.6819	280.457						138.063	220.225						166.904	290.899
								111.065	279.955						103.15	220.144						237.126	290.55
								135.959	279.889						130.128	220.106						130.267	290.123
								135.959	279.881						130.128	219.959						150.621	290.06
								155.108	279.145						111.085	219.597						187.259	289.986
								149.364	279.104						120.607	219.593						208.63	289.879
								139.789	278.794						139.65	219.182						173.011	289.816
								82.3415	278.731						214.235	219.017						168.94	289.484
								114.895	278.71						122.194	218.837						130.267	289.284
								128.3	278.669						79.3465	218.772						178.099	289.066
								99.5758	278.604						109.498	218.702						195.4	288.695
								164.683	278.454						153.932	218.478						152.656	288.491
								153.194	278.345						123.78	218.336						137.391	288.06
								101.491	277.998						77.7595	218.227						184.205	287.895
								139.789	276.883						112.672	216.954						209.648	287.73
								72.7669	276.565						114.259	216.847						168.94	287.626
								93.8311	276.473						93.6288	216.83						193.365	287.488
								139.789	276.372						114.259	216.727						209.648	287.104
								147.449	276.288						85.6942	216.189						219.825	286.942
								135.959	276.217						101.563	216.16						174.028	286.635
								107.235	276.125						111.085	215.99						122.125	286.377
								109.15	276.119						111.085	215.984						180.135	286.242
								112.98	275.932						122.194	215.929						289.029	285.811
								155.108	275.511						111.085	215.475						194.382	285.629
								126.385	275.483						123.78	215.464						149.603	285.479
								157.023	274.828						131.715	215.188						168.94	284.911
								124.47	274.807						95.2158	214.941						216.772	284.772
								99.5758	274.519						109.498	214.909						145.532	284.769
								139.789	274.497						90.455	214.606						163.851	284.744
								105.321	274.41						123.78	213.799						163.851	284.587
								112.98	274.073						104.737	213.102						152.656	284.561
								143.619	274.027						99.9766	213.07						159.78	284.497
								114.895	273.877						126.954	212.752						238.144	284.473
								78.5117	273.668						133.302	212.733						168.94	283.436
								97.6609	273.556						138.063	212.22						196.418	283.253
								91.9161	273.448						123.78	212.038						208.63	283.132
								126.385	273.393						109.498	211.998						171.993	283.095
								74.6819	273.198						93.6288	211.876						138.408	283.04
								143.619	273.154						104.737	211.738						169.957	283.029
								70.852	273.127						98.3896	211.705						115.001	282.964
								130.215	272.779						96.8027	211.631						149.603	282.545
								166.598	272.57						142.824	211.508						162.833	282.441
								134.044	271.888						123.78	211.015						140.444	282.379
								116.81	271.676						109.498	210.768						177.081	282.357
								141.704	271.608						125.367	210.745						169.957	282.175
								134.044	271.499						95.2158	210.693						158.763	281.289
								116.81	270.931						123.78	210.67						170.975	281.035
								118.725	270.553						131.715	210.62						131.285	280.894
								168.513	270.308						79.3465	210.563						227.967	280.14
								134.044	269.977						106.324	210.492						199.471	280.078
								139.789	269.969						139.65	210.469						183.188	280.066
								67.0222	269.841						96.8027	210.226						265.622	280.051
								80.4266	269.463						115.846	210.035						185.223	279.922
								116.81	269.384						114.259	209.928						169.957	279.847
								139.789	269.338						209.475	209.859						192.347	279.625
								147.449	269.126						90.455	209.79						164.869	279.423
								145.534	269.039						117.433	209.612						184.205	279.352
								135.959	268.958						104.737	209.6						163.851	279.089
								124.47	268.436						128.541	209.357						188.276	279.065
								151.279	268.381						104.737	209.315						181.152	278.754
								118.725	268.104						87.2811	209.153						150.621	278.558
								149.364	267.957						84.1073	208.858						152.656	278.422
								135.959	267.938						82.5203	208.699						175.046	278.338
								185.747	267.797						95.2158	208.653						161.816	277.844
								120.64	267.724						152.345	208.638						110.93	277.805
								124.47	267.634						114.259	208.448						227.967	277.335
								99.5758	267.58						117.433	208.112						188.276	277.09
								128.3	267.533						104.737	207.846						146.55	276.916
								130.215	267.21						117.433	207.668						173.011	276.554
								93.8311	267.142						150.758	207.572						193.365	276.302
								130.215	267.126						155.519	207.237						198.453	276.277
								124.47	266.911						150.758	207.053						133.32	276.258
								128.3	266.908						69.8249	206.862						171.993	276.197
								90.0012	266.851						136.476	206.663						169.957	276.17
								124.47	266.791						93.6288	206.229						159.78	276.164
								149.364	266.713						199.953	205.871						170.975	275.3
								120.64	266.683						111.085	205.867						155.71	275.253
								126.385	266.666						111.085	205.666						162.833	275.19
								93.8311	266.626						133.302	205.373						153.674	275.154
								137.874	266.079						88.868	205.291						175.046	274.955
								122.555	265.614						101.563	205.281						186.241	274.634
								124.47	265.606						85.6942	205.184						154.692	274.545
								130.215	265.514						93.6288	205.165						127.214	274.414
								109.15	265.506						101.563	205.067						176.064	274.194
								124.47	265.487						115.846	204.931						141.462	274.111
								111.065	265.237						120.607	204.302						168.94	273.973
								101.491	265.231						185.671	204.271						150.621	273.851
								139.789	265.098						134.889	204.254						173.011	273.736
								116.81	264.987						128.541	204.152						133.32	273.622
								126.385	264.791						72.9988	204.099						183.188	273.559
								149.364	264.658						115.846	204.028						201.506	273.539
								166.598	264.609						92.0419	204.005						240.179	273.394
								111.065	264.535						88.868	203.969						164.869	273.255
								134.044	264.446						87.2811	203.861						181.152	273.005
								141.704	264.438						404.667	203.752						169.957	272.974
								76.5968	264.356						126.954	203.687						170.975	272.639
								134.044	264.266						88.868	203.544						148.586	272.619
								72.7669	263.872						72.9988	203.525						185.223	272.125
								80.4266	263.853						147.584	203.199						202.524	272.054
								134.044	263.802						139.65	203.014						171.993	271.975
								112.98	263.418						126.954	202.834						146.55	271.629
								183.832	263.31						139.65	202.507						159.78	271.524
								93.8311	263.166						93.6288	202.461						221.861	271.505
								128.3	263.152						111.085	202.407						167.922	271.496
								107.235	263.035						195.192	202.304						170.975	271.332
								134.044	262.959						114.259	202.103						175.046	271.083
								155.108	262.902						80.9334	202.065						134.338	270.946
								76.5968	262.655						114.259	201.959						184.205	270.923
								91.9161	262.589						99.9766	201.818						207.613	270.87
								93.8311	262.472						139.65	201.791						173.011	270.813
								114.895	262.459						134.889	201.783						150.621	270.703
								130.215	262.388						69.8249	201.758						153.674	270.611
								132.129	261.888						125.367	201.722						183.188	270.094
								164.683	261.584						120.607	201.686						111.948	269.789
								134.044	261.573						115.846	201.575						143.497	269.517
								128.3	261.516						92.0419	201.536						146.55	269.445
								114.895	261.505						99.9766	201.496						187.259	268.97
								126.385	261.478						107.911	201.385						168.94	268.886
								134.044	261.084						85.6942	201.238						118.054	268.769
								122.555	260.964						120.607	201.179						127.214	268.608
								76.5968	260.94						104.737	201.146						182.17	268.608
								139.789	260.757						93.6288	201.018						141.462	268.502
								80.4266	260.668						119.02	200.869						174.028	268.496
								120.64	260.178						123.78	200.756						123.143	268.324
								168.513	260.081						122.194	200.712						146.55	267.908
								74.6819	260.007						104.737	200.57						157.745	267.903
								82.3415	259.654						139.65	200.526						130.267	267.845
								145.534	259.591						120.607	200.511						170.975	267.746
								130.215	259.591						103.15	200.189						173.011	267.487
								130.215	259.192						106.324	200.176						166.904	267.437
								78.5117	258.885						111.085	200.174						166.904	267.348
								164.683	258.586						82.5203	199.822						171.993	267.303
								130.215	258.542						126.954	199.791						147.568	266.82
								153.194	258.333						107.911	199.743						133.32	266.766
								120.64	258.295						120.607	199.632						138.408	266.661
								72.7669	258.143						114.259	199.269						134.338	266.612
								130.215	257.993						130.128	199.118						160.798	266.262
								137.874	257.792						312.625	199.024						164.869	266.236
								147.449	257.493						131.715	199.014						189.294	266.225
								120.64	257.471						103.15	198.85						182.17	266.006
								124.47	257.444						76.1726	198.821						159.78	265.908
								130.215	257.314						114.259	198.806						152.656	265.689
								120.64	257.11						149.171	198.66						217.79	265.593
								122.555	257.094						101.563	198.392						176.064	265.103
								99.5758	257.064						109.498	198.373						135.355	264.964
								145.534	257.061						92.0419	198.339						152.656	264.784
								101.491	256.99						114.259	198.325						145.532	264.62
								164.683	256.977						119.02	198.299						145.532	264.56
								68.9371	256.958						117.433	198.251						132.302	264.539
								149.364	256.767						90.455	198.251						156.727	264.419
								158.938	256.314						128.541	198.232						190.312	264.292
								78.5117	256.295						115.846	198.008						270.711	264.192
								116.81	256.256						125.367	197.971						164.869	264.191
								99.5758	256.243						122.194	197.956						180.135	264.173
								155.108	256.161						138.063	197.876						153.674	263.894
								126.385	256.034						136.476	197.774						178.099	263.824
								130.215	255.618						139.65	197.635						124.161	263.46
								78.5117	255.471						96.8027	197.416						180.135	263.33
								76.5968	255.466						74.5857	197.351						180.135	263.204
								105.321	255.319						119.02	197.221						138.408	263.197
								101.491	255.254						192.018	197.129						181.152	263.191
								114.895	255.191						69.8249	197.087						153.674	263.085
								107.235	255.15						88.868	197.041						186.241	263.058
								149.364	255.123						158.693	197.009						176.064	262.717
								143.619	255.12						111.085	196.873						124.161	262.66
								155.108	254.892						99.9766	196.747						152.656	262.553
								114.895	254.859						136.476	196.731						167.922	262.524
								122.555	254.775						112.672	196.695						110.93	262.259
								155.108	254.702						106.324	196.576						140.444	262.146
								72.7669	254.419						98.3896	196.565						233.055	262.07
								137.874	254.011						107.911	196.32						160.798	261.943
								137.874	253.933						120.607	196.228						167.922	261.813
								122.555	253.661						114.259	196.15						137.391	261.729
								88.0863	253.634						122.194	196.14						165.887	261.657
								105.321	253.558						138.063	195.983						168.94	261.232
								114.895	253.337						122.194	195.968						214.737	261.066
								116.81	253.204						149.171	195.907						235.091	260.975
								149.364	253.125						119.02	195.876						148.586	260.701
								112.98	253.068						158.693	195.763						175.046	260.596
								155.108	252.862						138.063	195.759						179.117	260.583
								70.852	252.685						122.194	195.715						149.603	260.441
								70.852	252.603						96.8027	195.29						149.603	260.379
								132.129	252.432						122.194	195.25						129.249	260.376
								120.64	252.353						114.259	194.898						132.302	260.288
								122.555	252.334						103.15	194.678						233.055	260.172
								76.5968	251.929						87.2811	194.615						163.851	259.793
								168.513	251.679						79.3465	194.406						192.347	259.618
								128.3	251.649						122.194	194.391						123.143	259.611
								74.6819	251.103						133.302	194.311						163.851	259.543
								91.9161	251.024						119.02	194.259						189.294	259.434
								151.279	251.005						112.672	194.232						158.763	259.326
								114.895	250.997						106.324	194.127						166.904	259.159
								135.959	250.981						88.868	194.11						175.046	259.089
								103.406	250.687						125.367	194.092						186.241	259.076
								139.789	250.581						106.324	194.039						148.586	258.997
								111.065	250.541						158.693	193.983						195.4	258.993
								135.959	250.367						117.433	193.966						144.515	258.723
								137.874	250.299						119.02	193.926						132.302	258.351
								135.959	250.288						79.3465	193.765						236.109	258.319
								155.108	250.255						85.6942	193.677						241.197	258.316
								111.065	250.076						117.433	193.618						213.719	258.248
								143.619	250.068						123.78	193.553						148.586	258.177
								103.406	249.951						93.6288	193.421						126.196	258.177
								97.6609	249.812						134.889	193.409						168.94	258.162
								130.215	249.774						101.563	193.231						176.064	258.085
								157.023	249.445						138.063	193.084						123.143	257.969
								141.704	249.437						111.085	192.766						162.833	257.872
								111.065	248.961						95.2158	192.638						163.851	257.819
								97.6609	248.918						150.758	192.556						156.727	257.603
								132.129	248.76						109.498	192.271						173.011	257.539
								91.9161	248.758						120.607	192.129						157.745	257.41
								76.5968	248.733						115.846	191.976						154.692	257.338
								124.47	248.7						125.367	191.949						189.294	257.317
								76.5968	248.673						98.3896	191.459						190.312	257.129
								95.746	248.619						136.476	191.444						133.32	256.904
								118.725	248.255						99.9766	191.431						145.532	256.609
								139.789	248.214						109.498	191.364						178.099	256.468
								149.364	248.135						147.584	191.253						122.125	256.338
								153.194	248.01						142.824	191.107						133.32	256.249
								132.129	247.91						84.1073	191.098						146.55	256.169
								139.789	247.684						150.758	191.004						175.046	256.14
								132.129	247.35						66.651	190.989						186.241	255.854
								153.194	247.268						115.846	190.872						178.099	255.807
								116.81	247.187						130.128	190.816						122.125	255.743
								134.044	247.165						126.954	190.816						208.63	255.724
								128.3	247.113						107.911	190.78						184.205	255.696
								70.852	247.029						220.583	190.751						144.515	255.542
								151.279	246.928						92.0419	190.661						228.985	255.401
								128.3	246.676						136.476	190.61						165.887	255.388
								67.0222	246.667						128.541	190.598						204.56	255.36
								120.64	246.643						88.868	190.466						133.32	255.348
								141.704	246.624						130.128	190.302						173.011	255.182
								112.98	246.57						114.259	190.273						147.568	255.015
								114.895	246.499						117.433	190.143						147.568	254.928
								111.065	246.189						114.259	190.045						142.479	254.69
								137.874	246.186						82.5203	189.961						162.833	254.58
								130.215	246.148						103.15	189.911						122.125	254.548
								109.15	245.896						131.715	189.85						184.205	254.546
								111.065	245.83						95.2158	189.735						145.532	254.536
								120.64	245.67						123.78	189.706						126.196	254.534
								122.555	245.629						126.954	189.63						137.391	254.36
								111.065	245.558						125.367	189.571						225.931	254.319
								68.9371	245.556						125.367	189.224						141.462	254.286
								143.619	245.404						142.824	189.199						157.745	254.175
								114.895	245.393						119.02	189.004						180.135	254.116
								137.874	245.265						101.563	188.809						125.178	253.993
								95.746	245.164						136.476	188.79						195.4	253.979
								109.15	245.159						125.367	188.769						146.55	253.805
								97.6609	244.974						107.911	188.761						145.532	253.77
								128.3	244.882						101.563	188.711						167.922	253.763
								145.534	244.765						74.5857	188.514						187.259	253.547
								109.15	244.691						142.824	188.352						157.745	253.038
								120.64	244.52						93.6288	188.346						133.32	252.909
								109.15	244.403						93.6288	188.346						157.745	252.901
								126.385	244.219						117.433	188.189						239.162	252.797
								111.065	244.191						133.302	188.074						128.231	252.764
								132.129	244.17						139.65	187.934						96.6824	252.725
								143.619	244.161						104.737	187.854						157.745	252.457
								137.874	244.094						112.672	187.829						217.79	252.337
								145.534	244.08						126.954	187.758						170.975	252.297
								109.15	243.977						88.868	187.695						154.692	252.294
								107.235	243.92						128.541	187.404						136.373	252.272
								116.81	243.911						96.8027	187.307						140.444	252.252
								93.8311	243.857						112.672	187.221						196.418	252.115
								137.874	243.724						136.476	187.217						180.135	252.02
								112.98	243.593						134.889	187.203						139.426	251.993
								141.704	243.544						93.6288	186.985						187.259	251.885
								72.7669	243.373						128.541	186.976						182.17	251.833
								155.108	243.33						115.846	186.947						173.011	251.799
								122.555	243.292						99.9766	186.884						196.418	251.796
								105.321	243.251						157.106	186.811						179.117	251.557
								101.491	243.028						98.3896	186.775						186.241	251.52
								114.895	242.957						128.541	186.75						139.426	251.302
								112.98	242.911						142.824	186.641						167.922	251.264
								132.129	242.841						85.6942	186.606						182.17	251.105
								155.108	242.626						149.171	186.585						141.462	251.079
								70.852	242.604						117.433	186.543						124.161	251.048
								122.555	242.566						144.411	186.405						171.993	251.043
								147.449	242.452						131.715	186.367						126.196	251.017
								105.321	241.835						80.9334	186.331						160.798	250.924
								135.959	241.549						133.302	186.256						166.904	250.707
								141.704	241.541						90.455	186.086						128.231	250.693
								107.235	241.495						115.846	185.912						131.285	250.676
								149.364	241.435						120.607	185.904						149.603	250.627
								88.0863	241.403						103.15	185.902						147.568	250.611
								128.3	241.337						176.149	185.883						228.985	250.579
								101.491	241.337						138.063	185.866						142.479	250.568
								124.47	241.223						128.541	185.86						117.037	250.55
								141.704	241.166						130.128	185.431						126.196	250.427
								101.491	241.068						104.737	185.334						163.851	250.397
								68.9371	241.028						119.02	185.326						165.887	250.339
								80.4266	240.908						125.367	185.179						162.833	250.265
								65.1073	240.854						115.846	185.098						163.851	250.15
								118.725	240.832						114.259	185.014						179.117	250.035
								130.215	240.818						131.715	184.984						180.135	250.031
								130.215	240.807						133.302	184.951						199.471	249.918
								109.15	240.625						95.2158	184.903						254.427	249.865
								70.852	240.462						155.519	184.744						168.94	249.863
								78.5117	240.316						107.911	184.727						179.117	249.755
								139.789	240.283						111.085	184.647						221.861	249.669
								135.959	240.155						122.194	184.645						121.107	249.612
								126.385	240.03						79.3465	184.641						103.806	249.378
								139.789	239.949						131.715	184.299						184.205	249.366
								74.6819	239.78						104.737	184.262						118.054	249.145
								139.789	239.549						138.063	184.245						165.887	249.127
								143.619	239.546						114.259	184.222						188.276	249.073
								99.5758	239.443						114.259	184.021						146.55	249.035
								111.065	239.397						87.2811	183.952						210.666	248.914
								157.023	239.253						112.672	183.826						157.745	248.897
								145.534	239.196						103.15	183.74						167.922	248.737
								176.173	239.049						69.8249	183.619						161.816	248.73
								162.768	239.035						99.9766	183.529						176.064	248.697
								126.385	238.978						123.78	183.491						188.276	248.633
								118.725	238.783						134.889	183.453						159.78	248.613
								135.959	238.679						114.259	183.447						210.666	248.564
								157.023	238.516						133.302	183.426						153.674	248.481
								124.47	238.481						109.498	183.367						158.763	248.468
								101.491	238.418						287.234	183.231						140.444	248.365
								114.895	238.348						139.65	183.053						155.71	248.364
								128.3	238.263						244.387	183.045						183.188	248.312
								130.215	238.234						195.192	183.016						160.798	248.218
								126.385	238.147						123.78	182.848						137.391	247.827
								74.6819	238.109						128.541	182.827						173.011	247.649
								70.852	238.041						117.433	182.8						140.444	247.601
								137.874	238.027						85.6942	182.77						171.993	247.546
								166.598	237.842						125.367	182.555						157.745	247.319
								135.959	237.766						106.324	182.525						152.656	247.299
								95.746	237.494						101.563	182.381						126.196	247.112
								72.7669	237.451						115.846	182.379						171.993	247.105
								74.6819	237.372						82.5203	182.343						226.949	247.105
								118.725	237.244						109.498	182.299						155.71	247.1
								112.98	237.236						125.367	182.146						152.656	247.026
								132.129	237.176						101.563	182.144						196.418	247.013
								107.235	237.116						96.8027	182.09						130.267	246.999
								132.129	237.005						112.672	181.993						189.294	246.954
								143.619	236.991						112.672	181.97						135.355	246.765
								91.9161	236.918						95.2158	181.727						184.205	246.74
								122.555	236.847						114.259	181.715						134.338	246.617
								76.5968	236.777						111.085	181.7						189.294	246.516
								118.725	236.383						61.8902	181.656						245.268	246.507
								91.9161	236.233						95.2158	181.621						130.267	246.469
								72.7669	236.13						95.2158	181.482						139.426	246.411
								112.98	235.863						341.19	181.44						184.205	246.176
								116.81	235.804						90.455	181.315						232.038	246.158
								157.023	235.749						138.063	181.292						162.833	246.113
								91.9161	235.73						98.3896	181.258						145.532	246.098
								74.6819	235.673						98.3896	181.239						195.4	246.089
								109.15	235.608						203.127	181.227						165.887	246.019
								130.215	235.573						133.302	181.21						142.479	245.905
								153.194	235.535						123.78	181.166						154.692	245.881
								97.6609	235.352						61.8902	181.042						149.603	245.8
								126.385	235.323						85.6942	180.929						130.267	245.782
								120.64	235.266						115.846	180.869						212.701	245.742
								124.47	235.032						104.737	180.825						173.011	245.665
								116.81	235.005						98.3896	180.825						195.4	245.564
								132.129	234.969						214.235	180.67						191.329	245.272
								112.98	234.939						114.259	180.653						149.603	245.265
								149.364	234.765						95.2158	180.626						160.798	245.216
								116.81	234.73						87.2811	180.496						97.7001	245.186
								109.15	234.629						123.78	180.456						163.851	245.185
								116.81	234.428						117.433	180.362						130.267	245.132
								101.491	234.417						122.194	180.326						130.267	244.952
								137.874	234.355						111.085	180.282						163.851	244.952
								95.746	234.23						119.02	180.238						184.205	244.87
								122.555	234.181						111.085	180.154						158.763	244.853
								91.9161	234.14						112.672	180.146						123.143	244.775
								67.0222	234.083						133.302	180.119						165.887	244.75
								101.491	234.07						288.821	180.022						192.347	244.737
								141.704	234.061						115.846	180.02						202.524	244.65
								137.874	234.018						109.498	179.987						206.595	244.593
								128.3	233.746						104.737	179.939						150.621	244.494
								88.0863	233.55						98.3896	179.924						153.674	244.468
								114.895	233.477						119.02	179.909						122.125	244.252
								158.938	233.463						128.541	179.777						167.922	244.244
								120.64	233.453						103.15	179.725						130.267	244.137
								114.895	233.401						68.238	179.683						185.223	244.076
								109.15	233.284						95.2158	179.673						136.373	243.966
								111.065	233.271						65.0641	179.647						141.462	243.866
								180.002	233.208						141.237	179.612						175.046	243.846
								206.811	233.192						114.259	179.497						161.816	243.692
								101.491	233.116						133.302	179.415						170.975	243.69
								103.406	233.086						117.433	179.342						156.727	243.651
								90.0012	232.982						133.302	179.289						188.276	243.639
								126.385	232.857						111.085	179.197						140.444	243.501
								124.47	232.852						98.3896	179.153						156.727	243.483
								122.555	232.732						138.063	179.103						122.125	243.475
								128.3	232.577						125.367	179.055						127.214	243.44
								103.406	232.482						99.9766	178.965						154.692	243.329
								68.9371	232.45						95.2158	178.931						205.577	243.291
								147.449	232.439						172.975	178.749						98.7178	243.271
								101.491	232.433						99.9766	178.669						187.259	243.242
								130.215	232.36						76.1726	178.504						128.231	243.09
								70.852	232.341						104.737	178.372						144.515	243.075
								120.64	232.322						115.846	178.368						211.684	243.029
								116.81	232.292						93.6288	178.347						154.692	242.99
								112.98	232.287						112.672	178.142						129.249	242.987
								107.235	232.284						63.4772	178.135						118.054	242.853
								114.895	232.265						145.998	178.123						145.532	242.853
								72.7669	232.257						77.7595	178.087						177.081	242.576
								114.895	232.143						90.455	178.074						211.684	242.573
								120.64	232.056						123.78	178.037						134.338	242.485
								132.129	232.05						120.607	178.016						153.674	242.352
								76.5968	232.039						128.541	178.01						143.497	242.289
								109.15	231.876						96.8027	177.976						150.621	242.221
								118.725	231.863						120.607	177.972						142.479	242.09
								84.2565	231.776						74.5857	177.955						167.922	242.046
								128.3	231.713						112.672	177.938						138.408	241.993
								126.385	231.536						79.3465	177.829						175.046	241.945
								72.7669	231.46						74.5857	177.75						124.161	241.874
								114.895	231.441						122.194	177.702						226.949	241.848
								124.47	231.349						84.1073	177.641						189.294	241.769
								147.449	231.281						79.3465	177.463						130.267	241.732
								379.154	231.227						133.302	177.417						120.09	241.701
								74.6819	231.205						122.194	177.377						131.285	241.691
								112.98	231.123						76.1726	177.362						167.922	241.599
								294.898	231.023						72.9988	177.323						157.745	241.561
								120.64	230.982						111.085	177.239						156.727	241.424
								137.874	230.966						92.0419	177.18						139.426	241.416
								160.853	230.9						112.672	177.172						169.957	241.232
								95.746	230.775						119.02	177.067						129.249	241.108
								134.044	230.71						120.607	177.013						130.267	241.094
								111.065	230.588						111.085	176.973						184.205	241.039
								120.64	230.205						171.388	176.904						161.816	241.023
								86.1714	230.169						98.3896	176.835						158.763	240.964
								145.534	230.129						112.672	176.732						105.842	240.771
								147.449	230.126						114.259	176.7						137.391	240.685
								111.065	230.047						106.324	176.665						126.196	240.65
								109.15	229.895						114.259	176.583						170.975	240.599
								143.619	229.705						76.1726	176.583						145.532	240.544
								114.895	229.626						95.2158	176.575						154.692	240.392
								101.491	229.555						65.0641	176.411						146.55	240.342
								114.895	229.555						85.6942	176.405						169.957	240.336
								139.789	229.514						107.911	176.405						149.603	240.309
								95.746	229.503						112.672	176.361						111.948	240.212
								118.725	229.354						96.8027	176.349						132.302	240.103
								72.7669	229.348						101.563	176.33						147.568	239.929
								149.364	229.267						145.998	176.265						215.754	239.529
								128.3	229.221						117.433	176.233						183.188	239.521
								122.555	229.21						72.9988	176.215						168.94	239.442
								112.98	229.131						123.78	176.152						156.727	239.333
								122.555	229.112						115.846	176.091						111.948	239.32
								132.129	229.074						85.6942	176.089						178.099	239.312
								84.2565	229.028						120.607	176.068						189.294	239.206
								122.555	228.954						139.65	176.032						152.656	239.17
								82.3415	228.764						150.758	176.016						125.178	239.147
								74.6819	228.721						87.2811	175.969						144.515	239.069
								157.023	228.62						103.15	175.921						137.391	238.989
								134.044	228.587						88.868	175.879						146.55	238.946
								134.044	228.571						109.498	175.844						124.161	238.89
								101.491	228.566						122.194	175.699						167.922	238.879
								74.6819	228.53						92.0419	175.615						165.887	238.807
								72.7669	228.362						119.02	175.565						109.913	238.801
								105.321	228.356						145.998	175.557						162.833	238.711
								122.555	228.335						112.672	175.433						165.887	238.705
								90.0012	228.117						142.824	175.255						203.542	238.361
								80.4266	228.074						111.085	175.226						156.727	238.281
								116.81	228.071						125.367	175.161						124.161	238.268
								141.704	228.03						131.715	175.102						148.586	238.264
								91.9161	227.897						119.02	175.096						157.745	238.258
								141.704	227.886						112.672	175.079						144.515	238.194
								126.385	227.791						120.607	174.962						140.444	238.16
								145.534	227.761						122.194	174.943						170.975	237.774
								93.8311	227.753						136.476	174.912						211.684	237.689
								67.0222	227.734						136.476	174.889						134.338	237.597
								141.704	227.685						107.911	174.866						161.816	237.529
								124.47	227.682						74.5857	174.642						149.603	237.407
								143.619	227.68						115.846	174.629						152.656	237.389
								90.0012	227.522						119.02	174.623						150.621	237.333
								99.5758	227.514						123.78	174.495						154.692	237.198
								112.98	227.294						122.194	174.489						132.302	237.08
								111.065	227.228						85.6942	174.405						181.152	237.025
								107.235	227.033						99.9766	174.231						153.674	237.025
								109.15	227.022						112.672	174.227						99.7355	237.022
								130.215	226.91						171.388	174.024						238.144	236.948
								118.725	226.802						119.02	173.952						131.285	236.86
								130.215	226.707						123.78	173.756						126.196	236.834
								86.1714	226.669						106.324	173.577						154.692	236.787
								134.044	226.611						76.1726	173.575						158.763	236.72
								135.959	226.59						142.824	173.571						131.285	236.63
								112.98	226.582						120.607	173.487						174.028	236.609
								109.15	226.497						126.954	173.383						191.329	236.607
								76.5968	226.408						111.085	173.251						158.763	236.598
								137.874	226.239						117.433	173.234						189.294	236.514
								145.534	226.209						119.02	173.207						179.117	236.445
								130.215	226.174						122.194	173.077						147.568	236.392
								122.555	226.092						69.8249	173.031						247.303	236.273
								116.81	226.076						107.911	172.987						143.497	236.258
								135.959	226.071						79.3465	172.962						192.347	236.171
								151.279	226.022						112.672	172.951						119.072	236.074
								132.129	225.967						60.3033	172.934						171.993	235.959
								132.129	225.937						96.8027	172.895						148.586	235.818
								135.959	225.875						98.3896	172.857						189.294	235.762
								124.47	225.804						117.433	172.821						157.745	235.658
								134.044	225.725						163.454	172.759						109.913	235.655
								135.959	225.725						130.128	172.746						165.887	235.652
								128.3	225.706						111.085	172.742						224.914	235.536
								63.1923	225.603						109.498	172.738						144.515	235.507
								134.044	225.587						112.672	172.733						139.426	235.407
								153.194	225.421						111.085	172.725						157.745	235.309
								88.0863	225.367						96.8027	172.708						138.408	235.277
								145.534	225.31						114.259	172.683						191.329	235.209
								141.704	225.214						126.954	172.545						134.338	235.128
								143.619	225.127						93.6288	172.49						146.55	235.089
								76.5968	225.068						103.15	172.405						100.753	235.015
								114.895	225.04						109.498	172.373						149.603	234.964
								90.0012	225.027						104.737	172.338						162.833	234.96
								97.6609	225.011						117.433	172.338						163.851	234.929
								90.0012	224.981						142.824	172.312						132.302	234.862
								116.81	224.915						104.737	172.294						116.019	234.823
								120.64	224.88						130.128	172.218						139.426	234.806
								122.555	224.807						136.476	172.069						149.603	234.761
								80.4266	224.774						123.78	172.053						174.028	234.659
								114.895	224.755						133.302	172.036						160.798	234.654
								114.895	224.752						117.433	171.921						105.842	234.554
								134.044	224.739						115.846	171.803						120.09	234.419
								116.81	224.731						107.911	171.803						141.462	234.327
								147.449	224.589						101.563	171.732						158.763	234.301
								103.406	224.538						101.563	171.726						146.55	234.274
								74.6819	224.44						119.02	171.686						158.763	234.268
								124.47	224.111						93.6288	171.651						130.267	234.163
								78.5117	224.105						126.954	171.539						132.302	234.023
								101.491	224.067						107.911	171.483						129.249	233.959
								99.5758	223.989						119.02	171.443						125.178	233.944
								126.385	223.847						69.8249	171.399						135.355	233.911
								118.725	223.801						117.433	171.368						149.603	233.77
								130.215	223.79						82.5203	171.336						158.763	233.76
								107.235	223.76						63.4772	171.315						125.178	233.705
								103.406	223.758						106.324	171.307						178.099	233.697
								135.959	223.717						95.2158	171.286						133.32	233.653
								143.619	223.695						88.868	171.286						126.196	233.646
								120.64	223.692						99.9766	171.259						122.125	233.61
								70.852	223.676						128.541	171.196						164.869	233.588
								103.406	223.562						117.433	171.137						119.072	233.443
								99.5758	223.497						104.737	171.112						193.365	233.41
								153.194	223.486						93.6288	171.047						140.444	233.354
								141.704	223.437						120.607	171.026						160.798	233.351
								124.47	223.426						84.1073	171.022						140.444	233.342
								107.235	223.336						134.889	170.972						151.639	233.172
								135.959	223.293						126.954	170.94						162.833	233.055
								137.874	223.26						120.607	170.909						190.312	233.051
								109.15	223.165						114.259	170.842						169.957	232.98
								101.491	223.002						111.085	170.838						149.603	232.87
								99.5758	222.929						92.0419	170.815						170.975	232.77
								135.959	222.926						117.433	170.79						148.586	232.742
								95.746	222.91						125.367	170.771						183.188	232.69
								103.406	222.896						79.3465	170.731						175.046	232.664
								130.215	222.893						152.345	170.637						128.231	232.609
								137.874	222.812						125.367	170.601						130.267	232.505
								134.044	222.763						119.02	170.538						134.338	232.505
								145.534	222.749						126.954	170.408						196.418	232.498
								124.47	222.719						134.889	170.379						149.603	232.361
								128.3	222.657						87.2811	170.371						167.922	232.311
								63.1923	222.578						134.889	170.329						165.887	232.232
								135.959	222.483						163.454	170.323						140.444	232.185
								134.044	222.453						90.455	170.314						150.621	232.162
								135.959	222.45						65.0641	170.23						170.975	232.152
								112.98	222.42						71.4118	170.222						159.78	232.054
								124.47	222.293						109.498	170.174						131.285	232.047
								135.959	222.271						122.194	170.092						225.931	232.023
								105.321	222.23						104.737	170.092						162.833	231.976
								111.065	222.23						123.78	170.082						116.019	231.939
								118.725	222.181						119.02	169.912						155.71	231.938
								93.8311	222.157						131.715	169.874						183.188	231.914
								130.215	222.121						142.824	169.866						189.294	231.868
								111.065	221.961						136.476	169.845						130.267	231.852
								114.895	221.956						274.539	169.828						166.904	231.825
								101.491	221.754						120.607	169.791						130.267	231.778
								122.555	221.749						120.607	169.772						134.338	231.569
								128.3	221.719						98.3896	169.761						144.515	231.412
								107.235	221.697						104.737	169.713						184.205	231.367
								118.725	221.689						74.5857	169.69						164.869	231.251
								120.64	221.624						101.563	169.516						149.603	231.186
								132.129	221.616						120.607	169.508						111.948	231.16
								109.15	221.575						77.7595	169.501						152.656	231.155
								72.7669	221.513						79.3465	169.495						122.125	231.017
								124.47	221.483						128.541	169.474						194.382	230.958
								111.065	221.455						69.8249	169.432						153.674	230.94
								141.704	221.325						134.889	169.384						187.259	230.919
								90.0012	221.311						99.9766	169.376						130.267	230.909
								88.0863	221.2						93.6288	169.323						121.107	230.798
								143.619	221.2						115.846	169.248						131.285	230.74
								134.044	221.192						215.822	169.166						120.09	230.685
								176.173	221.132						93.6288	169.16						132.302	230.674
								101.491	221.064						92.0419	169.156						109.913	230.672
								109.15	221.031						117.433	169.143						163.851	230.597
								80.4266	220.95						103.15	169.133						153.674	230.555
								114.895	220.936						131.715	169.093						153.674	230.554
								139.789	220.877						122.194	169.091						181.152	230.531
								105.321	220.863						134.889	169.018						156.727	230.51
								116.81	220.858						87.2811	169.001						149.603	230.42
								68.9371	220.719						117.433	168.978						149.603	230.356
								99.5758	220.673						92.0419	168.965						211.684	230.344
								122.555	220.654						107.911	168.936						159.78	230.328
								78.5117	220.564						134.889	168.909						151.639	230.318
								118.725	220.518						126.954	168.9						124.161	230.222
								107.235	220.491						126.954	168.831						148.586	230.099
								126.385	220.444						90.455	168.722						125.178	230.001
								74.6819	220.436						101.563	168.697						218.808	229.969
								86.1714	220.428						68.238	168.683						130.267	229.901
								107.235	220.404						111.085	168.636						145.532	229.867
								124.47	220.281						61.8902	168.567						145.532	229.845
								76.5968	220.208						92.0419	168.559						117.037	229.816
								76.5968	220.194						134.889	168.544						171.993	229.777
								112.98	220.148						133.302	168.542						155.71	229.77
								134.044	220.056						101.563	168.521						112.966	229.687
								143.619	219.985						117.433	168.469						142.479	229.65
								134.044	219.955						104.737	168.465						145.532	229.636
								65.1073	219.933						101.563	168.461						144.515	229.578
								147.449	219.909						166.628	168.345						124.161	229.37
								147.449	219.817						119.02	168.339						166.904	229.298
								128.3	219.727						139.65	168.266						112.966	229.298
								139.789	219.711						95.2158	168.224						119.072	229.281
								151.279	219.672						85.6942	168.157						184.205	229.268
								155.108	219.564						117.433	168.083						164.869	229.115
								147.449	219.542						111.085	168.083						145.532	229.032
								120.64	219.33						85.6942	168.073						141.462	229.027
								170.428	219.216						71.4118	168.06						163.851	229.014
								170.428	219.164						107.911	168.058						140.444	228.942
								80.4266	219.151						114.259	167.97						150.621	228.931
								139.789	219.096						120.607	167.964						202.524	228.902
								109.15	219.05						131.715	167.878						145.532	228.888
								132.129	218.958						106.324	167.784						146.55	228.717
								112.98	218.901						115.846	167.74						163.851	228.673
								118.725	218.857						106.324	167.719						171.993	228.644
								112.98	218.77						88.868	167.575						194.382	228.623
								103.406	218.71						138.063	167.549						175.046	228.568
								143.619	218.626						139.65	167.535						209.648	228.514
								124.47	218.602						131.715	167.457						174.028	228.493
								97.6609	218.425						69.8249	167.447						140.444	228.473
								134.044	218.411						101.563	167.411						144.515	228.402
								114.895	218.357						145.998	167.394						113.983	228.358
								68.9371	218.352						117.433	167.39						117.037	228.28
								99.5758	218.3						111.085	167.334						174.028	228.22
								145.534	218.297						90.455	167.319						193.365	228.134
								107.235	218.294						107.911	167.25						126.196	228.102
								128.3	218.188						66.651	167.149						149.603	228.08
								155.108	218.077						112.672	167.135						154.692	228.011
								126.385	218.036						130.128	167.114						166.904	227.977
								80.4266	218.034						95.2158	167.089						125.178	227.947
								109.15	218.014						109.498	167.038						164.869	227.931
								118.725	217.995						123.78	167.026						129.249	227.876
								93.8311	217.985						145.998	166.852						134.338	227.874
								101.491	217.928						115.846	166.837						195.4	227.871
								151.279	217.9						141.237	166.835						148.586	227.863
								134.044	217.868						101.563	166.816						133.32	227.843
								112.98	217.83						79.3465	166.795						134.338	227.827
								132.129	217.827						134.889	166.762						180.135	227.803
								70.852	217.781						66.651	166.735						141.462	227.736
								126.385	217.764						111.085	166.603						107.877	227.669
								158.938	217.59						131.715	166.58						140.444	227.65
								132.129	217.544						114.259	166.575						158.763	227.596
								134.044	217.542						101.563	166.492						163.851	227.55
								68.9371	217.517						131.715	166.395						180.135	227.541
								128.3	217.482						134.889	166.395						154.692	227.427
								134.044	217.43						99.9766	166.391						144.515	227.422
								130.215	217.387						114.259	166.309						134.338	227.344
								116.81	217.202						144.411	166.299						145.532	227.329
								143.619	217.199						126.954	166.184						141.462	227.307
								109.15	217.194						112.672	166.15						198.453	227.266
								118.725	217.166						136.476	166.1						126.196	227.266
								128.3	217.099						71.4118	166.041						149.603	227.264
								132.129	216.96						134.889	165.941						127.214	227.193
[truncated: 39,362 more rows]

## Sheet: Figure 3 reconstructions
PPL1	Note: z values need to be corrected according to the voxel size
[truncated: 12,856 more rows]

[truncated: 6 more sheets: Figure 4, Figure 4 reconstructions, Figure 6, Figure 6 reconstructions, Figure 7, Figure 7 figure supplement]
